# Supplementary material for: Genomic Insights into the Fungal Lignocellulolytic Machinery of Flammulina rossica
Source: Microorganisms. 2019 Oct 8;7(10):421. doi: 10.3390/microorganisms7100421 (PMC6843371; doi:10.3390/microorganisms7100421)
Supplement: Supplementary file 1 [file microorganisms-07-00421-s001.xlsx]

## Sheet: Table S1
Table S1. Gene prediction and annotation of the Flammulina rossica genome.
AUGUSTUS gene prediction						BLASTP search (NCBI NR)
gene ID	start	end	score	strand		Accession	Percent identity	Alignment length	Number of mismatches	Number of gap opens.	Start position in query	End position in query	Start position in subject	End position in subject	E-value	Bit score	description
g1	1	759	0.86	+
g2	1	723	0.21	+
g3	1695	2450	0.56	-
g4	2929	5890	0.78	+		SJL13218.1	28	200	120	7	705	885	586	780	2.3e-08	71.2	uncharacterized protein ARMOST_16657 [Armillaria ostoyae]
g5	5983	7128	0.29	-		SJL03176.1	36	344	209	6	7	344	3	341	2.6e-53	219.2	uncharacterized protein ARMOST_06522 [Armillaria ostoyae]
g6	7563	8363	0.65	+
g7	8411	9220	0.44	-
g8	9692	10640	0.45	+
g9	11300	11920	0.12	+
g10	81	1184	0.16	+
g11	1	603	0.72	+		PBK72172.1	71.7	191	37	1	1	191	192	365	1.2e-74	289.3	Suf-domain-containing protein [Armillaria solidipes]
g12	1	384	0.4	-
g13	2	413	0.55	-
g14	766	2257	0.62	-		KIY61649.1	40.8	299	147	8	185	457	2	296	1.6e-53	220.3	hypothetical protein CYLTODRAFT_362575 [Cylindrobasidium torrendii FP15055 ss-10]
g15	2507	4363	0.02	+		PPQ80089.1	32.6	350	156	12	144	424	449	787	2.9e-26	129.8	hypothetical protein CVT24_006543 [Panaeolus cyanescens]
g16	4987	9061	0.01	-		SJL02376.1	30	427	278	9	395	809	7	424	1e-37	168.7	uncharacterized protein ARMOST_05703 [Armillaria ostoyae]
g17	38	6435	0.07	-		KIY61680.1	35.4	1549	867	31	5	1463	7	1511	1.9e-253	886.3	hypothetical protein CYLTODRAFT_447602 [Cylindrobasidium torrendii FP15055 ss-10]
g18	2	407	0.56	-		PPQ75845.1	34	100	65	1	1	100	574	672	7.6e-09	69.7	hypothetical protein CVT26_001221 [Gymnopilus dilepis]
g19	2	254	0.52	-
g20	243	2354	0.7	+		KIY73483.1	47.5	642	288	9	1	618	1	617	3.6e-101	379	Bromodomain-containing protein [Cylindrobasidium torrendii FP15055 ss-10]
g21	2794	5854	0.08	+		KIY62722.1	72.5	665	178	4	20	680	19	682	1.2e-299	1038.5	hypothetical protein CYLTODRAFT_383261 [Cylindrobasidium torrendii FP15055 ss-10]
g22	6155	7096	0.94	-		XP_003034286.1	52.2	337	132	8	4	313	12	346	6.9e-85	323.9	hypothetical protein SCHCODRAFT_66464 [Schizophyllum commune H4-8]
g23	7432	8647	0.67	+		KIY73484.1	67.1	277	90	1	1	277	1	276	8.7e-103	383.3	alkaline phytoceramidase [Cylindrobasidium torrendii FP15055 ss-10]
g24	9770	10740	0.26	-		PBK78888.1	49.4	308	145	6	1	301	1	304	2.5e-71	278.9	NAD(P)-binding protein [Armillaria solidipes]
g25	11219	12888	0.9	+		PBK76843.1	74.7	521	124	5	1	519	1	515	3.5e-219	770.8	hypothetical protein ARMSODRAFT_948688 [Armillaria solidipes]
g26	13117	14624	0.6	-		OCB83899.1	68.1	329	104	1	21	349	603	930	2.4e-139	505	amidase signature enzyme [Sanghuangporus baumii]
g27	14738	16167	0.51	+		OCB83898.1	62.9	337	124	1	2	337	3	339	1.5e-122	449.1	hypothetical protein A7U60_g9104 [Sanghuangporus baumii]
g28	16284	19490	0.03	-		GAT57421.1	47.2	752	227	13	3	649	4	690	8.4e-178	633.6	stearoyl-CoA desaturase [Mycena chlorophos]
g29	19608	22595	0.67	+		KIY73480.1	63.8	917	312	5	1	914	1	900	0	1179.1	hypothetical protein CYLTODRAFT_434156 [Cylindrobasidium torrendii FP15055 ss-10]
g30	22673	25064	0.16	-		KIY73478.1	62.2	225	82	2	5	229	4	225	1.8e-76	297	hypothetical protein CYLTODRAFT_416851 [Cylindrobasidium torrendii FP15055 ss-10]
g31	25577	27523	0.45	-		PBK76825.1	79.7	429	82	4	1	427	1	426	1.3e-195	692.2	hypothetical protein ARMSODRAFT_245299 [Armillaria solidipes]
g32	28009	30398	0.06	+		KIY73476.1	72	672	180	4	8	676	5	671	8.2e-285	989.2	glycosyltransferase family 22 protein [Cylindrobasidium torrendii FP15055 ss-10]
g33	30579	31206	0.63	-		KIY65805.1	52.2	134	53	2	9	134	5	135	2e-33	151.8	hypothetical protein CYLTODRAFT_399821 [Cylindrobasidium torrendii FP15055 ss-10]
g34	31762	33564	0.97	+		PBL00606.1	44.3	592	291	15	10	578	7	582	2.4e-102	382.9	hypothetical protein ARMGADRAFT_1072952 [Armillaria gallica]
g35	33873	34413	0.94	-		XP_001831685.1	100	103	0	0	1	103	1	103	1.4e-47	198.4	histone H4 [Coprinopsis cinerea okayama7#130]
g36	34586	35261	0.54	+		TFK41810.1	66.7	171	42	2	1	157	1	170	8.9e-57	229.6	thioredoxin-domain-containing protein [Crucibulum laeve]
g37	35332	36288	0.89	-		KIY73470.1	54.8	272	108	5	3	263	5	272	1.1e-64	256.5	hypothetical protein CYLTODRAFT_439765 [Cylindrobasidium torrendii FP15055 ss-10]
g38	36589	41328	0.35	+		PBL00602.1	71.6	1298	349	9	78	1360	11	1304	0	1864.7	hypothetical protein ARMGADRAFT_1117408 [Armillaria gallica]
g39	41774	43056	0.24	+		KIY67185.1	92.5	321	24	0	1	321	1	321	1.3e-168	602.1	inorganic diphosphatase [Cylindrobasidium torrendii FP15055 ss-10]
g40	43162	44016	0.44	-		KIY73583.1	68.3	262	70	4	1	251	45	304	3e-91	344.7	atypical/PIKK/FRAP protein kinase [Cylindrobasidium torrendii FP15055 ss-10]
g41	44321	48924	0.27	+		KIY67186.1	75.8	702	162	5	1	702	1	694	8.7e-302	1046.6	hypothetical protein CYLTODRAFT_376523 [Cylindrobasidium torrendii FP15055 ss-10]
g42	49062	51006	0.73	-		PBL00596.1	64	509	174	5	42	546	32	535	5.1e-176	627.5	hypothetical protein ARMGADRAFT_1159913 [Armillaria gallica]
g43	52201	53593	0.16	-		PBK76814.1	65.5	339	78	3	8	307	6	344	2.3e-107	398.7	hypothetical protein ARMSODRAFT_244836 [Armillaria solidipes]
g44	53873	56962	0.03	+		GAV98832.1	54.8	454	190	7	21	460	31	483	1e-139	507.3	hypothetical protein LENED_000241 [Lentinula edodes]
g45	57620	58678	0.52	-		KIY67188.1	48.6	354	177	2	4	352	49	402	9.4e-91	343.6	6-phosphogluconate dehydrogenase C-terminal domain-like protein [Cylindrobasidium torrendii FP15055 ss-10]
g46	59265	63184	0.22	+		TFK90803.1	46.6	721	309	17	2	684	6	688	1.5e-157	567	hypothetical protein K466DRAFT_660549 [Polyporus arcularius HHB13444]
g47	66940	68473	0.23	+		KIY67191.1	51.1	456	182	13	1	439	1	432	5.3e-99	371.3	hypothetical protein CYLTODRAFT_422745 [Cylindrobasidium torrendii FP15055 ss-10]
g48	68807	73120	0.03	-		PPQ97714.1	60.2	1015	306	13	1	918	25	1038	0	1146.3	hypothetical protein CVT26_001904 [Gymnopilus dilepis]
g49	75720	77549	0.64	+		PBL00591.1	39	518	285	6	93	591	61	566	3.4e-104	389	hypothetical protein ARMGADRAFT_386081 [Armillaria gallica]
g50	77781	79847	0.98	+		KIY67195.1	63.1	561	203	3	1	558	1	560	8.5e-207	729.9	P-loop containing nucleoside triphosphate hydrolase protein [Cylindrobasidium torrendii FP15055 ss-10]
g51	80268	81926	0.71	+		KIY67196.1	45.9	573	232	20	1	542	1	526	3.6e-89	339	hypothetical protein CYLTODRAFT_490831 [Cylindrobasidium torrendii FP15055 ss-10]
g52	84042	86526	0.19	-		AGG68682.2	99.2	777	6	0	1	777	1	777	0	1538.1	putative mitochondrial intermediate peptidase, partial [Flammulina velutipes]
g53	91899	94975	0.26	-		PBL00565.1	62.9	641	233	5	2	637	4	644	8e-229	803.5	hypothetical protein ARMGADRAFT_384889 [Armillaria gallica]
g54	95246	97742	0.11	+		KIY69176.1	56.5	623	258	5	14	625	15	635	4.3e-195	691	hypothetical protein CYLTODRAFT_237652 [Cylindrobasidium torrendii FP15055 ss-10]
g55	98885	100001	0.49	-
g56	100743	103010	0.89	-		KIY69177.1	45.6	747	383	9	1	739	1	732	3.1e-184	655.2	hypothetical protein CYLTODRAFT_489187 [Cylindrobasidium torrendii FP15055 ss-10]
g57	103207	103611	0.51	+		PBK76782.1	93.8	32	2	0	1	32	1	32	2.8e-08	67.8	secE/sec61-gamma protein [Armillaria solidipes]
g58	103701	108740	0.01	-		SJL06196.1	44.8	1291	566	29	1	1225	1	1210	4.4e-260	907.9	uncharacterized protein ARMOST_09532 [Armillaria ostoyae]
g59	1	1151	0.82	+		KJA21201.1	70.6	235	66	1	116	347	239	473	1.2e-53	220.3	hypothetical protein HYPSUDRAFT_1089381 [Hypholoma sublateritium FD-334 SS-4]
g60	53	689	0.71	-		PBK66901.1	46.8	156	80	3	3	157	23	176	8.6e-29	136.7	hypothetical protein ARMSODRAFT_1086314 [Armillaria solidipes]
g61	2	247	0.75	-
g62	1	974	0.31	+		RDB22515.1	51.9	241	114	1	6	246	1499	1737	2.6e-66	261.9	putative AC transposase [Hypsizygus marmoreus]
g63	1	795	0.17	-		SJL12907.1	59.5	168	56	2	1	156	1	168	1.6e-45	192.2	uncharacterized protein ARMOST_16340 [Armillaria ostoyae]
g64	1041	8719	0.49	+		KIY63168.1	70.7	2451	665	17	1	2423	1	2427	0	3373.2	hypothetical protein CYLTODRAFT_494122 [Cylindrobasidium torrendii FP15055 ss-10]
g65	9491	12353	0.18	-		ATV82108.1	58.2	849	310	12	1	819	1	834	5.2e-233	817.4	putative zinc finger protein [Strobilurus tenacellus]
g66	12685	14076	0.7	-		KIY70830.1	91.9	344	28	0	1	344	1	344	1.1e-187	665.6	NADP+-dependent D-mannitol dehydrogenase [Cylindrobasidium torrendii FP15055 ss-10]
g67	14725	15268	0.56	-		SJK99773.1	68.2	129	36	1	1	129	1	124	4.7e-40	173.7	related to GRX1-glutaredoxin [Armillaria ostoyae]
g68	15531	17097	0.45	-		KIY70834.1	68.9	499	137	7	9	490	6	503	1.7e-199	705.3	hypothetical protein CYLTODRAFT_419368 [Cylindrobasidium torrendii FP15055 ss-10]
g69	17636	18321	0.9	+		KIY63163.1	36.5	181	92	7	27	192	34	206	1.8e-06	62.8	hypothetical protein CYLTODRAFT_446781 [Cylindrobasidium torrendii FP15055 ss-10]
g70	18581	19284	0.28	-		SJL07593.1	71.6	148	39	2	6	150	9	156	6.4e-52	213.8	related to HHE domain protein [Armillaria ostoyae]
g71	2	556	0.47	-
g72	674	1869	0.5	-
g73	1969	2504	0.96	+
g74	2553	3270	0.47	-
g75	3961	7608	0.32	+		RDB20084.1	41.8	905	442	8	105	1002	17	843	5.3e-180	641.7	hypothetical protein Hypma_012873 [Hypsizygus marmoreus]
g76	8967	10774	0.13	+		PBK65173.1	75.4	345	69	4	50	379	37	380	7.7e-139	503.4	purine and uridine phosphorylase [Armillaria solidipes]
g77	14023	15126	0.92	+		TFK33739.1	56.4	227	65	8	19	213	35	259	4.2e-48	201.8	hypothetical protein BDQ12DRAFT_690688 [Crucibulum laeve]
g78	16542	17226	0.07	-
g79	19364	24273	0.31	+		OCK97884.1	31.8	333	204	7	10	334	5	322	1.2e-38	172.6	NAD(P)-binding protein [Cenococcum geophilum 1.58]
g80	26880	28573	0.5	+		SJL14826.1	28.3	187	120	5	11	190	50	229	1.5e-10	77.8	uncharacterized protein ARMOST_18297 [Armillaria ostoyae]
g81	28867	30453	0.55	+		SJL14817.1	26	450	290	15	14	437	153	585	1.4e-21	114.4	uncharacterized protein ARMOST_18288 [Armillaria ostoyae]
g82	32405	34538	0.12	-		PBK63063.1	24.8	500	318	15	20	501	30	489	2.2e-21	114	hypothetical protein ARMSODRAFT_963606 [Armillaria solidipes]
g83	34953	36659	0.47	-		PBK67108.1	43.9	280	151	4	1	278	1	276	1.6e-54	223.8	hypothetical protein ARMSODRAFT_1021068 [Armillaria solidipes]
g84	37314	48434	0.01	+		KIY63600.1	52.9	656	298	6	746	1395	17	667	4.4e-196	696	hypothetical protein CYLTODRAFT_425967 [Cylindrobasidium torrendii FP15055 ss-10]
g85	48779	50132	0.89	-		SJL16086.1	35.8	383	213	9	11	387	15	370	3.1e-51	212.6	uncharacterized protein ARMOST_19602 [Armillaria ostoyae]
g86	50882	52028	0.78	+
g87	52089	54375	0.23	-		PBK68229.1	46.3	633	280	12	4	616	2	594	8.4e-151	543.9	cytochrome P450 monooxygenase pc-3 [Armillaria solidipes]
g88	55665	56419	0.27	+		PIL33061.1	66	235	69	3	3	226	89	323	1.5e-81	312.4	hypothetical protein GSI_04510 [Ganoderma sinense ZZ0214-1]
g89	56594	57534	0.7	-		ADX23539.1	87.7	253	31	0	1	253	131	383	4.2e-128	467.2	putative pheromone receptor [Flammulina velutipes]
g90	1	770	0.22	+
g91	203	1279	0.96	+		PBK66556.1	34.7	248	129	6	79	298	243	485	2.7e-25	125.9	hypothetical protein ARMSODRAFT_1021353 [Armillaria solidipes]
g92	1318	2014	0.85	-
g93	2588	3244	0.46	+
g94	4643	5413	0.35	+
g95	2	541	0.7	-
g96	1	999	0.01	+
g97	1	225	0.35	+
g98	1	1238	0.4	+
g99	895	1187	0.52	-
g100	696	2358	0.1	-		KIY68933.1	70.7	338	93	4	11	345	11	345	7.1e-126	460.3	hypothetical protein CYLTODRAFT_421165 [Cylindrobasidium torrendii FP15055 ss-10]
g101	2912	8460	0.01	-		KIY68934.1	77.9	569	102	5	524	1088	15	563	4.9e-263	917.5	catalase-domain-containing protein [Cylindrobasidium torrendii FP15055 ss-10]
g102	9567	12662	0.09	-		SJL00713.1	30.7	909	507	31	81	919	87	942	2.1e-79	307.4	uncharacterized protein ARMOST_04027 [Armillaria ostoyae]
g103	24	3564	0.14	+		KIY64410.1	73.7	899	210	7	30	926	1	875	0	1273.8	hypothetical protein CYLTODRAFT_493150 [Cylindrobasidium torrendii FP15055 ss-10]
g104	3699	5879	0.56	-		KIY64409.1	59.9	633	230	8	1	628	1	614	2.8e-154	555.4	hypothetical protein CYLTODRAFT_401941 [Cylindrobasidium torrendii FP15055 ss-10]
g105	6388	8383	0.29	-		KIY64408.1	80.9	439	73	3	1	437	1	430	3.8e-182	647.5	DUF155-domain-containing protein [Cylindrobasidium torrendii FP15055 ss-10]
g106	10124	11294	0.46	-		KIY64407.1	65.9	302	99	3	1	299	1	301	2.1e-107	398.7	hypothetical protein CYLTODRAFT_425236 [Cylindrobasidium torrendii FP15055 ss-10]
g107	14407	15818	0.67	-		KIY64406.1	56.2	320	115	3	1	318	1	297	6.1e-97	364	Di-copper centre-containing protein [Cylindrobasidium torrendii FP15055 ss-10]
g108	16185	18622	0.57	+		PBK94652.1	76.9	744	150	11	3	740	5	732	0	1067.8	NUC153 and WD40 repeat-containing nucleolar rRNA processing-related protein [Armillaria gallica]
g109	19374	19929	0.57	-		KIY61421.1	52.7	169	73	3	1	162	13	181	1.6e-40	175.6	hypothetical protein CYLTODRAFT_447710 [Cylindrobasidium torrendii FP15055 ss-10]
g110	20582	23291	0.01	+		KIY63167.1	67.6	722	176	5	4	686	9	711	4e-263	917.1	DNA mismatch repair protein MutL [Cylindrobasidium torrendii FP15055 ss-10]
g111	24887	25815	0.34	+
g112	25885	27026	0.13	+
g113	28379	28954	0.31	+
g114	29203	33775	0.02	-		KIY61422.1	74.5	415	101	3	289	702	1	411	1.5e-176	630.6	WD40 repeat-like protein [Cylindrobasidium torrendii FP15055 ss-10]
g115	1	756	0.82	+		KIM89536.1	41.6	166	87	5	1	163	408	566	1.1e-21	113.6	hypothetical protein PILCRDRAFT_60342 [Piloderma croceum F 1598]
g116	38	1578	0.92	-		KTB38906.1	54.9	506	192	6	3	506	778	1249	2.7e-147	531.9	putative gag-pol protein [Moniliophthora roreri]
g117	2	234	0.41	-		XP_007385856.1	64	75	27	0	1	75	191	265	3.4e-17	97.1	cytochrome P450 [Punctularia strigosozonata HHB-11173 SS5]
g118	674	3859	0.13	+		SJL13072.1	40.1	812	360	14	89	815	159	929	6.1e-149	538.1	uncharacterized protein ARMOST_16509 [Armillaria ostoyae]
g119	924	3521	0.06	+		KIY71971.1	66.7	571	160	4	5	554	3	564	1.7e-211	745.3	amp dependent CoA ligase [Cylindrobasidium torrendii FP15055 ss-10]
g120	3995	8318	0.02	+		PBK75157.1	78.6	735	129	5	297	1005	6	738	0	1149.8	AMP deaminase [Armillaria solidipes]
g121	10387	11765	0.75	+		PBK75156.1	56.8	324	130	3	3	320	2	321	9.6e-98	366.7	hypothetical protein ARMSODRAFT_951241 [Armillaria solidipes]
g122	12471	14667	0.45	-		PBK88895.1	84.3	521	80	1	55	575	1	519	6.8e-256	892.9	general substrate transporter [Armillaria gallica]
g123	15712	18935	0.12	+		PBK97347.1	56.6	830	311	11	11	803	15	832	3.2e-247	864.8	Rad4-domain-containing protein [Armillaria gallica]
g124	19157	22932	0.07	+		SJL00063.1	27.2	276	180	7	185	450	26	290	0.00034	57.4	uncharacterized protein ARMOST_03375 [Armillaria ostoyae]
g125	23252	25362	0.09	-		KIY69461.1	49.4	316	154	3	105	419	23	333	1.1e-69	273.9	hypothetical protein CYLTODRAFT_372585 [Cylindrobasidium torrendii FP15055 ss-10]
g126	3	621	0.91	-		KZP06766.1	60.2	171	65	2	1	170	124	292	4.1e-55	224.2	hypothetical protein FIBSPDRAFT_914630 [Fibularhizoctonia sp. CBS 109695]
g127	1422	1855	0.46	+
g128	1	2964	0.02	+		PBK65869.1	67	725	220	3	48	769	2	710	1.4e-291	1011.9	hypothetical protein ARMSODRAFT_960763 [Armillaria solidipes]
g129	4267	4763	0.27	-		PBK81722.1	55.3	150	47	2	1	149	106	236	4.6e-39	170.6	hypothetical protein ARMGADRAFT_1020080 [Armillaria gallica]
g130	4855	5091	0.34	-		KIY63665.1	77.3	66	13	1	1	66	28	91	2.2e-16	94.4	hypothetical protein CYLTODRAFT_457921 [Cylindrobasidium torrendii FP15055 ss-10]
g131	5511	8061	0.21	+		PBK65868.1	75.1	670	142	10	1	656	1	659	7.8e-272	946	RhoGAP-domain-containing protein [Armillaria solidipes]
g132	8296	9547	0.44	-		SJL03396.1	67.7	365	117	1	10	374	8	371	2.6e-134	488.4	uncharacterized protein ARMOST_06750 [Armillaria ostoyae]
g133	1	946	0.91	+		KDQ50847.1	54.2	271	117	4	1	268	49	315	9.1e-73	283.5	hypothetical protein JAAARDRAFT_62885 [Jaapia argillacea MUCL 33604]
g134	1	1622	0.33	+		PPQ89298.1	31.7	120	72	4	76	188	177	293	1.1e-06	63.5	hypothetical protein CVT25_000314 [Psilocybe cyanescens]
g135	1691	3211	0.22	-		KIY62840.1	30.2	377	217	13	38	400	62	406	3.9e-32	149.1	acid protease [Cylindrobasidium torrendii FP15055 ss-10]
g136	4431	6426	0.4	+		KIY67240.1	67.8	410	127	4	13	419	1	408	3.4e-141	511.5	hypothetical protein CYLTODRAFT_353638 [Cylindrobasidium torrendii FP15055 ss-10]
g137	6812	7752	0.09	-		PBL03043.1	74.5	200	50	1	1	199	1	200	7.7e-82	313.2	DJ-1 protein [Armillaria gallica]
g138	10100	12070	0.21	-		KIY67214.1	67.2	472	152	2	1	472	1	469	3.5e-181	644.4	MFS general substrate transporter [Cylindrobasidium torrendii FP15055 ss-10]
g139	12685	14075	0.99	-		KIY68975.1	56.6	290	121	2	4	290	2	289	4.1e-84	321.6	lytic polysaccharide monooxygenase [Cylindrobasidium torrendii FP15055 ss-10]
g140	1	476	0.14	+
g141	911	4268	0.03	+		KIY61187.1	24.7	283	189	9	542	818	210	474	2.6e-15	94.4	hypothetical protein CYLTODRAFT_479614 [Cylindrobasidium torrendii FP15055 ss-10]
g142	4404	5830	0.2	-
g143	6042	11024	0.26	-		XP_001882684.1	24.3	1738	1061	53	44	1570	161	1855	3.6e-81	313.9	predicted protein [Laccaria bicolor S238N-H82]
g144	11548	12151	0.58	+
g145	59	540	0.31	-		KIY61813.1	53.8	91	41	1	2	91	417	507	2.2e-17	98.2	hypothetical protein CYLTODRAFT_384282 [Cylindrobasidium torrendii FP15055 ss-10]
g146	530	2616	0.9	-		KTB46206.1	25.2	674	355	17	2	565	81	715	1.4e-35	161	hypothetical protein WG66_1218 [Moniliophthora roreri]
g147	2945	6025	0.22	+		SJL16081.1	37.2	487	288	4	342	820	99	575	7.4e-70	275.4	uncharacterized protein ARMOST_19597 [Armillaria ostoyae]
g148	1	1025	0.49	-		TFK53306.1	45.3	316	161	5	1	311	475	783	2.1e-65	259.2	hypothetical protein OE88DRAFT_1733256 [Heliocybe sulcata]
g149	48	3733	0.06	-
g150	4646	6352	0.73	-		PBK92424.1	40.5	304	160	8	144	447	162	444	8.2e-50	208	hypothetical protein ARMGADRAFT_1080509 [Armillaria gallica]
g151	6659	13219	0.13	+		GAT48229.1	35.6	1952	1109	42	132	2015	186	2056	2.5e-289	1005.7	ATP-dependent DNA helicase [Mycena chlorophos]
g152	13265	14541	0.47	-		KIY63091.1	25.2	492	269	9	3	399	97	584	4.5e-20	109	hypothetical protein CYLTODRAFT_494174 [Cylindrobasidium torrendii FP15055 ss-10]
g153	1	1775	0.97	+		GAT48786.1	27.5	207	131	3	2	208	73	260	3.3e-11	80.1	predicted protein, partial [Mycena chlorophos]
g154	53	370	0.6	+
g155	257	2033	0.13	-
g156	1	3079	0.31	+		KII88046.1	29.8	292	179	9	118	405	306	575	5.1e-25	126.7	hypothetical protein PLICRDRAFT_30508 [Plicaturopsis crispa FD-325 SS-3]
g157	599	1489	0.05	-
g158	2	147	0.35	-
g159	1	962	0.54	+		KIK71811.1	27.7	213	132	7	42	237	36	243	4.7e-07	65.1	hypothetical protein PAXRUDRAFT_22802 [Paxillus rubicundulus Ve08
g160	984	2492	0.88	-		PBK84887.1	24.2	447	277	15	6	423	20	433	1.1e-15	94.7	hypothetical protein ARMGADRAFT_1131991 [Armillaria gallica]
g161	3966	5340	0.48	-		KIY66828.1	72.4	395	107	1	4	398	6	398	9.6e-167	596.3	family 88 glycosyl hydrolase [Cylindrobasidium torrendii FP15055 ss-10]
g162	5925	6500	0.83	-
g163	6887	7347	0.18	+		PBK88036.1	50	84	42	0	1	84	1	84	7e-16	92.8	hypothetical protein ARMGADRAFT_439818 [Armillaria gallica]
g164	8615	9507	0.76	+
g165	10380	10631	0.79	-
g166	88	1845	0.86	-		PBK96366.1	65.8	468	144	1	1	452	75	542	5.9e-170	607.1	hypothetical protein ARMGADRAFT_1010037 [Armillaria gallica]
g167	1	983	0.04	+
g168	1	493	0.33	+
g169	655	1091	0.48	+
g170	32	1774	0.19	+
g171	1125	2379	0.33	+
g172	2799	4106	0.6	-
g173	4601	9946	0.01	+		PBK70514.1	73.6	288	73	2	201	488	17	301	4.3e-103	386.3	hypothetical protein ARMSODRAFT_956016 [Armillaria solidipes]
g174	10820	11086	0.07	+
g175	11995	15950	0.03	+		KIY67852.1	77.7	368	71	3	578	936	3	368	4.4e-135	492.3	hypothetical protein CYLTODRAFT_436819 [Cylindrobasidium torrendii FP15055 ss-10]
g176	16295	17407	0.66	-
g177	1	788	0.76	+		KIY67374.1	86	243	27	3	2	244	25	260	2e-108	401.7	Pkinase-domain-containing protein [Cylindrobasidium torrendii FP15055 ss-10]
g178	1	453	0.08	+
g179	81	2385	0.01	-		GAW07994.1	54.7	53	24	0	408	460	4	56	2.5e-06	63.5	60S ribosomal protein L13a [Lentinula edodes]
g180	4366	6348	0.01	-
g181	6443	7673	0.09	+
g182	91	3186	0.25	+		KIY73086.1	67.4	883	256	12	1	874	1	860	5.5e-305	1056.6	COG complex component [Cylindrobasidium torrendii FP15055 ss-10]
g183	3300	3896	0.51	-		GAW09499.1	66.4	143	48	0	18	160	18	160	3.6e-47	198	PUA-like domain [Lentinula edodes]
g184	3977	5139	0.56	+		KIY73091.1	77.2	285	62	2	3	286	4	286	1.4e-124	455.7	NGG1 interacting factor 3-like protein [Cylindrobasidium torrendii FP15055 ss-10]
g185	5196	12971	0.1	-		SJK97811.1	60.1	1533	552	20	841	2341	16	1520	0	1745.3	uncharacterized protein ARMOST_01066 [Armillaria ostoyae]
g186	13041	14217	0.49	+		KIK04039.1	59.8	348	116	5	1	327	1	345	2.5e-117	431.8	hypothetical protein K443DRAFT_93998 [Laccaria amethystina LaAM-08-1]
g187	14336	16309	0.59	-		PBK74319.1	59.1	487	154	17	136	584	134	613	3.9e-105	392.1	hypothetical protein ARMSODRAFT_951948 [Armillaria solidipes]
g188	16575	18540	0.35	+		KIY73089.1	84.3	542	83	1	16	555	2	543	8.4e-267	929.1	threonine ammonia-lyase [Cylindrobasidium torrendii FP15055 ss-10]
g189	18608	20981	0.05	-		KIY73120.1	31.6	450	215	14	102	465	35	477	9.3e-47	198	hypothetical protein CYLTODRAFT_485833 [Cylindrobasidium torrendii FP15055 ss-10]
g190	21690	22472	0.67	-		KIY73122.1	56.5	271	97	5	3	254	2	270	5.4e-75	290.8	hypothetical protein CYLTODRAFT_342910 [Cylindrobasidium torrendii FP15055 ss-10]
g191	23670	26180	0.13	+		KIY73120.1	34	520	297	10	79	580	1	492	1.4e-76	297.4	hypothetical protein CYLTODRAFT_485833 [Cylindrobasidium torrendii FP15055 ss-10]
g192	26646	28789	0.7	-		KIY66952.1	76.8	488	110	2	4	489	6	492	1.7e-210	741.9	MFS general substrate transporter [Cylindrobasidium torrendii FP15055 ss-10]
g193	29285	29964	0.34	+		KIP04870.1	66.2	216	64	2	2	208	4	219	3.8e-47	198	hypothetical protein PHLGIDRAFT_129251 [Phlebiopsis gigantea 11061_1 CR5-6]
g194	30235	31207	0.44	+		KIY73124.1	52.4	246	93	4	1	243	1	225	8.3e-65	256.9	hypothetical protein CYLTODRAFT_387625 [Cylindrobasidium torrendii FP15055 ss-10]
g195	31658	35245	0.11	-		PPR03558.1	31.9	847	498	27	93	911	733	1528	1.4e-80	311.2	hypothetical protein CVT26_006100 [Gymnopilus dilepis]
g196	35734	44309	0.01	-		PPR03556.1	25.4	1808	988	56	370	1883	82	1822	2.8e-102	384.4	hypothetical protein CVT26_006098 [Gymnopilus dilepis]
g197	2	981	0.1	-
g198	1920	2258	0.25	+
g199	3213	9901	0.01	+
g200	2	1721	0.39	-		PBK60627.1	46.3	436	213	5	77	496	450	880	3.5e-99	372.1	hypothetical protein ARMSODRAFT_921980 [Armillaria solidipes]
g201	365	1666	0.25	+
g202	3308	3508	0.47	+
g203	3512	7585	0.02	-		PBK58826.1	42.7	723	357	15	74	756	17	722	3.3e-156	562.4	hypothetical protein ARMSODRAFT_967413 [Armillaria solidipes]
g204	8779	9894	0.15	+		KIY65570.1	51.5	163	75	2	72	234	23	181	2.1e-33	152.5	SRA-YDG protein [Cylindrobasidium torrendii FP15055 ss-10]
g205	9976	11160	0.49	-		PBK78288.1	51.4	325	157	1	2	325	1	325	2.4e-101	378.6	alpha/beta-hydrolase [Armillaria solidipes]
g206	11708	13330	0.96	+		SJL15319.1	23.5	341	231	7	16	355	24	335	1.8e-16	97.4	uncharacterized protein ARMOST_18812 [Armillaria ostoyae]
g207	13896	14327	0.55	+
g208	14881	20168	0.13	-		PBK97395.1	77.7	980	210	5	425	1398	110	1086	0	1530.8	hypothetical protein ARMGADRAFT_987069 [Armillaria gallica]
g209	22637	24530	0.94	-		PBK61124.1	75.6	595	144	1	6	600	8	601	4.5e-266	926.8	hypothetical protein ARMSODRAFT_965302 [Armillaria solidipes]
g210	24616	25233	1	+		KIY63369.1	77.5	204	46	0	1	204	1	204	2.2e-84	321.6	phosphoribosylglycinamide formyltransferase [Cylindrobasidium torrendii FP15055 ss-10]
g211	25361	26421	0.76	-		KIY70467.1	59.6	265	102	3	4	266	3	264	3.9e-84	321.2	phosphoglycerate mutase [Cylindrobasidium torrendii FP15055 ss-10]
g212	26777	27674	0.22	+		KIY63913.1	54.3	208	86	4	14	217	9	211	4e-47	198	phosphoglycerate mutase-like protein [Cylindrobasidium torrendii FP15055 ss-10]
g213	27985	30051	0.94	-		PBK97377.1	74.1	464	118	1	1	464	1	462	4.1e-206	727.6	aspartic peptidase A1 [Armillaria gallica]
g214	30575	32642	0.13	+		PBK97378.1	50.7	483	217	7	7	476	7	481	7e-130	474.2	acid protease [Armillaria gallica]
g215	33687	36089	0.19	-		PBK75014.1	76	292	68	1	173	464	6	295	5.2e-121	444.5	hypothetical protein ARMSODRAFT_951083 [Armillaria solidipes]
g216	36917	39112	0.14	+		SJL00766.1	43.3	654	308	19	24	643	239	863	2.8e-141	512.3	uncharacterized protein ARMOST_04080 [Armillaria ostoyae]
g217	39701	42062	0.06	-		PBK75013.1	60.6	543	159	14	9	517	10	531	1.1e-167	599.7	UPF0187-domain-containing protein [Armillaria solidipes]
g218	42741	43789	0.33	-
g219	44207	45053	0.53	-		KIY71334.1	38.3	162	82	6	1	145	1	161	1.6e-15	93.2	hypothetical protein CYLTODRAFT_450828 [Cylindrobasidium torrendii FP15055 ss-10]
g220	45676	46579	0.22	-		PBK75166.1	82.9	211	35	1	1	211	31	240	1.3e-95	359	YjeF N-terminal domain-like protein [Armillaria solidipes]
g221	47104	48666	0.32	+		PBK97331.1	47.9	376	180	6	1	360	1	376	1e-83	320.5	hypothetical protein ARMGADRAFT_1075826 [Armillaria gallica]
g222	49354	50033	0.53	+
g223	50389	53991	0.12	-		PBK75169.1	81.3	358	65	2	401	757	4	360	3.6e-176	628.6	hypothetical protein ARMSODRAFT_1056270 [Armillaria solidipes]
g224	54587	54983	0.14	-
g225	55439	56786	0.23	-		KIY71994.1	67.9	271	84	1	1	268	1	271	1.1e-101	379.8	Aldo/keto reductase [Cylindrobasidium torrendii FP15055 ss-10]
g226	57088	59979	0.13	-		SJL07814.1	77	734	136	7	6	715	11	735	0	1095.9	uncharacterized protein ARMOST_11166 [Armillaria ostoyae]
g227	60105	61863	0.12	+		PBK97327.1	81	195	37	0	38	232	4	198	4.4e-96	361.7	hypothetical protein ARMGADRAFT_922728 [Armillaria gallica]
g228	62522	64326	0.04	+		AGG68702.2	97.9	288	6	0	1	288	38	325	3.6e-160	574.3	putative pheromone receptor [Flammulina velutipes]
g229	64799	69738	0.01	+		KIY72318.1	50.2	824	313	18	374	1110	35	848	1.7e-207	733	hypothetical protein CYLTODRAFT_440727 [Cylindrobasidium torrendii FP15055 ss-10]
g230	70667	73649	0.14	+		PBK75189.1	49.2	457	193	7	274	706	7	448	2.1e-118	436.4	hypothetical protein ARMSODRAFT_929274 [Armillaria solidipes]
g231	73864	77215	0.15	-
g232	1	1071	0.38	+		XP_027609396.1	41.8	318	160	3	1	294	325	641	5.2e-66	261.2	hypothetical protein SCP_0113720 [Sparassis crispa]
g233	984	2000	0.11	-		KIY62743.1	61.2	201	63	2	28	213	167	367	1.7e-59	239.2	Zn-dependent exopeptidase [Cylindrobasidium torrendii FP15055 ss-10]
g234	2028	5340	0.04	-		SJL13405.1	41.3	283	157	3	145	424	111	387	1.3e-55	228	uncharacterized protein ARMOST_16848 [Armillaria ostoyae]
g235	794	2109	0.41	-		XP_007301850.1	45.4	284	146	5	1	280	235	513	2.1e-59	239.2	cytochrome P450 [Stereum hirsutum FP-91666 SS1]
g236	240	1781	0.18	+		PBK66952.1	48.6	111	51	2	38	142	544	654	6.2e-14	88.6	hypothetical protein ARMSODRAFT_996151 [Armillaria solidipes]
g237	2386	5538	0.26	-		PBK61181.1	25.4	169	103	7	734	900	470	617	0.00016	58.5	hypothetical protein ARMSODRAFT_1025904 [Armillaria solidipes]
g238	2	321	0.36	-		KIM80685.1	62.1	87	33	0	1	87	529	615	2.8e-23	117.5	hypothetical protein PILCRDRAFT_9490 [Piloderma croceum F 1598]
g239	2	1945	0.1	-
g240	3852	4952	0.66	-		KNZ72396.1	39.1	384	187	12	1	365	32	387	1.5e-62	250	hypothetical protein J132_03488 [Termitomyces sp. J132]
g241	5264	6292	0.04	-
g242	6595	7884	0.51	-
g243	8216	9394	0.23	+		PBK83556.1	34.4	308	164	6	25	296	4	309	9.8e-44	187.2	hypothetical protein ARMGADRAFT_876973, partial [Armillaria gallica]
g244	11639	13752	0.04	+		XP_007863071.1	48.8	170	84	2	294	462	5	172	3.8e-31	146	hypothetical protein GLOTRDRAFT_57634 [Gloeophyllum trabeum ATCC 11539]
g245	14452	14713	0.23	+
g246	15557	16117	0.19	+
g247	16363	22292	0.53	-		KIL60986.1	38.3	1780	911	26	19	1745	17	1662	0	1119.8	hypothetical protein M378DRAFT_1060074 [Amanita muscaria Koide BX008]
g248	23833	24250	0.49	+		KIY71663.1	34.7	98	58	4	11	102	64	161	3.5e-06	60.8	hypothetical protein CYLTODRAFT_441067 [Cylindrobasidium torrendii FP15055 ss-10]
g249	2	462	0.5	-		KIK53144.1	55.8	120	53	0	1	120	96	215	2.9e-31	144.4	hypothetical protein GYMLUDRAFT_207531, partial [Gymnopus luxurians FD-317 M1]
g250	1	515	0.72	-
g251	1985	3302	0.07	+		KIM38536.1	41.8	256	141	4	95	345	111	363	7.2e-49	204.5	hypothetical protein M413DRAFT_30083 [Hebeloma cylindrosporum h7]
g252	4705	8338	0.01	-
g253	1016	1389	0.56	-		KIY69872.1	68.9	45	14	0	2	46	33	77	7.4e-07	63.2	asparaginyl-tRNA synthetase [Cylindrobasidium torrendii FP15055 ss-10]
g254	1	2946	0.07	+		KIY66407.1	70.9	522	112	6	1	514	200	689	9.3e-212	746.1	OPT superfamily oligopeptide transporter [Cylindrobasidium torrendii FP15055 ss-10]
g255	4031	6800	0.06	+		KIY65704.1	72.2	288	76	2	14	297	14	301	1.2e-118	437.2	carbohydrate esterase family 16 protein [Cylindrobasidium torrendii FP15055 ss-10]
g256	11329	12702	0.18	-		SJK98273.1	56.7	372	142	10	44	406	73	434	7.6e-103	384	uncharacterized protein ARMOST_01536 [Armillaria ostoyae]
g257	13304	14208	0.45	-		PBK90942.1	71.7	212	55	3	1	212	1	207	1.2e-70	276.2	hypothetical protein ARMGADRAFT_968755 [Armillaria gallica]
g258	14265	17111	0.08	+		PBK94709.1	47.2	426	137	10	234	616	1	381	5.1e-90	342	hypothetical protein ARMGADRAFT_991005 [Armillaria gallica]
g259	17319	19500	0.21	-		KIL60534.1	37.2	274	163	5	13	284	87	353	9.1e-35	158.3	hypothetical protein M378DRAFT_168028 [Amanita muscaria Koide BX008]
g260	20063	23854	0.11	-		PBK92489.1	21.4	946	546	26	108	1001	43	842	2.4e-22	117.9	hypothetical protein ARMGADRAFT_1013091 [Armillaria gallica]
g261	24876	25896	0.42	-		PBK88975.1	72.4	156	36	1	1	149	1	156	2e-60	242.3	hypothetical protein ARMGADRAFT_1015672 [Armillaria gallica]
g262	30071	30731	0.3	+
g263	32697	34108	0.2	-		SJL08517.1	25.5	459	290	16	2	434	89	521	2.5e-27	133.3	uncharacterized protein ARMOST_11881 [Armillaria ostoyae]
g264	1085	1474	0.99	-
g265	5	1218	0.41	+		SJK99940.1	71.7	382	106	2	5	384	2092	2473	1.2e-168	602.4	uncharacterized protein ARMOST_03251 [Armillaria ostoyae]
g266	386	1907	0.69	+		KIY69872.1	68.4	459	141	3	1	457	1	457	7.5e-181	643.3	asparaginyl-tRNA synthetase [Cylindrobasidium torrendii FP15055 ss-10]
g267	2049	5038	0.04	-		GAT49283.1	37.2	755	385	18	34	735	190	908	5.6e-109	405.2	predicted protein [Mycena chlorophos]
g268	5674	6655	0.49	+		KIY63922.1	70.2	272	78	2	7	275	10	281	2.7e-109	404.8	hypothetical protein CYLTODRAFT_381577 [Cylindrobasidium torrendii FP15055 ss-10]
g269	6985	9044	0.43	-		PBK64692.1	52.8	513	231	7	1	512	1	503	8.8e-154	553.5	cytochrome P450 [Armillaria solidipes]
g270	9596	10995	0.73	+		KIY69881.1	76.7	387	82	5	7	390	10	391	1.4e-167	599	hypothetical protein CYLTODRAFT_348670 [Cylindrobasidium torrendii FP15055 ss-10]
g271	32	486	0.56	+		KIY63321.1	48.9	90	43	2	1	89	375	462	7.9e-14	86.3	hypothetical protein CYLTODRAFT_426202 [Cylindrobasidium torrendii FP15055 ss-10]
g272	1481	3599	0.37	+		PBL04157.1	52	469	213	4	3	469	7	465	2.2e-135	492.3	homogentisate 1,2-dioxygenase [Armillaria gallica]
g273	4083	6022	0.21	-		PBK76307.1	66.4	441	123	6	8	430	20	453	1.4e-163	585.9	hypothetical protein ARMSODRAFT_948108 [Armillaria solidipes]
g274	9726	11774	0.07	-		KIY66583.1	37.2	277	131	7	238	501	259	505	1.5e-32	151	carbohydrate-binding module family 21 protein [Cylindrobasidium torrendii FP15055 ss-10]
g275	12100	13739	0.13	-		PBK76254.1	47.5	385	154	10	23	382	13	374	2.5e-64	256.1	hypothetical protein ARMSODRAFT_998908 [Armillaria solidipes]
g276	18825	22825	0.5	+		KIY66584.1	64.7	730	212	13	42	742	1	713	6.8e-234	820.8	hypothetical protein CYLTODRAFT_431727 [Cylindrobasidium torrendii FP15055 ss-10]
g277	23018	24611	0.92	+		KIY66207.1	78.3	497	103	3	2	497	3	495	8.6e-215	756.1	nucleotide-diphospho-sugar transferase [Cylindrobasidium torrendii FP15055 ss-10]
g278	26601	27870	0.43	+		PBK76307.1	71.7	127	34	1	8	132	20	146	5.7e-45	191	hypothetical protein ARMSODRAFT_948108 [Armillaria solidipes]
g279	27941	30026	0.08	+		PBK76307.1	62.6	214	74	3	6	217	290	499	6.2e-70	275	hypothetical protein ARMSODRAFT_948108 [Armillaria solidipes]
g280	628	3052	0.04	-		KIY64372.1	46.2	606	285	8	1	573	1	598	2.6e-133	485.7	hypothetical protein CYLTODRAFT_102547 [Cylindrobasidium torrendii FP15055 ss-10]
g281	3333	3572	0.42	-
g282	1	1036	0.28	-
g283	1	102	0.95	+
g284	2	1616	0.65	-		KZP09283.1	51.5	497	213	6	1	487	779	1257	7.6e-131	477.2	hypothetical protein FIBSPDRAFT_938563 [Fibularhizoctonia sp. CBS 109695]
g285	242	1301	0.34	+		RDB15905.1	25	248	163	8	9	253	15	242	7.6e-07	64.7	hypothetical protein Hypma_003561 [Hypsizygus marmoreus]
g286	1712	4748	0.34	-		PBK60997.1	63.5	1022	281	28	1	963	1	989	0	1070.1	STE-domain-containing protein [Armillaria solidipes]
g287	7075	7689	0.22	-		KZT25013.1	81.2	80	15	0	32	111	1	80	1.3e-28	136	signal recognition particle, SRP9/SRP14 subunit [Neolentinus lepideus HHB14362 ss-1]
g288	7754	9387	0.1	+		KIK98374.1	85.5	289	41	1	2	290	3	290	1.3e-143	519.2	hypothetical protein PAXRUDRAFT_692252 [Paxillus rubicundulus Ve08
g289	9606	11361	0.52	-		TFK68745.1	27.5	200	112	7	232	405	21	213	0.00015	57.8	hypothetical protein BDN72DRAFT_841437 [Pluteus cervinus]
g290	11972	12918	0.5	-
g291	13270	13950	0.33	-
g292	14451	15568	0.06	+		KIY68188.1	34.5	388	202	13	3	341	5	389	1.1e-25	127.5	hypothetical protein CYLTODRAFT_490004 [Cylindrobasidium torrendii FP15055 ss-10]
g293	15777	16499	0.04	+
g294	17622	18602	0.07	+		KIY66476.1	31.2	154	90	4	60	205	64	209	9.6e-05	57.8	hypothetical protein CYLTODRAFT_423386 [Cylindrobasidium torrendii FP15055 ss-10]
g295	18901	19880	0.03	+
g296	20222	23779	0.06	-		PBK61009.1	55.8	565	211	6	2	532	4	563	4.2e-177	631.7	Gpi1-domain-containing protein [Armillaria solidipes]
g297	23862	24613	0.53	+		PBK61010.1	91.9	198	16	0	4	201	11	208	4e-102	380.6	hypothetical protein ARMSODRAFT_965382 [Armillaria solidipes]
g298	24814	25941	0.68	-		KIY66476.1	26.3	198	131	5	39	226	26	218	1.2e-07	67.4	hypothetical protein CYLTODRAFT_423386 [Cylindrobasidium torrendii FP15055 ss-10]
g299	27668	27952	0.43	+
g300	28127	32495	0.01	-		XP_007866771.1	40	145	76	4	27	162	41	183	2.1e-15	94.4	hypothetical protein GLOTRDRAFT_139052 [Gloeophyllum trabeum ATCC 11539]
g301	35429	35917	0.53	-		XP_007768450.1	31.8	132	83	4	1	131	1	126	1.7e-09	72.4	hypothetical protein CONPUDRAFT_90076 [Coniophora puteana RWD-64-598 SS2]
g302	36193	36758	0.87	+		KIY63892.1	64.2	162	56	1	10	171	5	164	7.4e-49	203.4	hypothetical protein CYLTODRAFT_493552, partial [Cylindrobasidium torrendii FP15055 ss-10]
g303	1	388	0.82	-		SJL09303.1	70.8	113	33	0	1	113	1	113	2.3e-38	167.9	uncharacterized protein ARMOST_12680 [Armillaria ostoyae]
g304	2	946	0.35	-		TFK22962.1	28.7	251	140	7	27	252	94	330	3e-17	99	hypothetical protein FA15DRAFT_705880 [Coprinopsis marcescibilis]
g305	1631	2846	0.59	-		KIY60670.1	31.2	240	152	6	114	351	13	241	3e-18	102.8	hypothetical protein CYLTODRAFT_460550 [Cylindrobasidium torrendii FP15055 ss-10]
g306	3330	7637	0.3	-		SJL05573.1	66.2	1276	326	24	76	1259	4	1266	0	1524.2	uncharacterized protein ARMOST_08933 [Armillaria ostoyae]
g307	8802	10092	0.87	-
g308	10518	12010	0.56	-		KIY67346.1	72.8	463	119	3	2	463	4	460	7.1e-195	689.9	glycosyltransferase family 21 protein [Cylindrobasidium torrendii FP15055 ss-10]
g309	12082	13752	0.37	+		KIY63757.1	32.3	496	295	16	4	470	8	491	4.3e-52	215.7	hypothetical protein CYLTODRAFT_425829 [Cylindrobasidium torrendii FP15055 ss-10]
g310	13937	15563	0.47	-		PBL01187.1	33	488	292	16	1	478	50	512	1.5e-57	233.8	hypothetical protein ARMGADRAFT_415220 [Armillaria gallica]
g311	15856	20262	0.04	+		TCD69894.1	47.7	1174	485	29	10	1083	5	1149	2.3e-268	935.3	Amino-acid acetyltransferase, mitochondrial [Steccherinum ochraceum]
g312	20370	22300	0.53	-		PBL01185.1	56.3	419	153	6	138	530	1206	1620	7.8e-121	444.1	hypothetical protein ARMGADRAFT_1043215 [Armillaria gallica]
g313	22801	26634	0.72	+		KIY70158.1	71.2	770	217	3	1	768	1	767	0	1096.3	hypothetical protein CYLTODRAFT_488311 [Cylindrobasidium torrendii FP15055 ss-10]
g314	27350	29031	0.49	-		PBK77402.1	58.2	459	174	7	1	448	50	501	5.1e-140	507.7	hypothetical protein ARMSODRAFT_904125 [Armillaria solidipes]
g315	29266	37391	0.01	+		PPQ64495.1	48.4	952	376	17	6	919	2	876	3.4e-251	879	hypothetical protein CVT26_002034 [Gymnopilus dilepis]
g316	37490	40873	0.06	-		SJL05546.1	56.3	920	354	12	3	886	6	913	5.7e-294	1020	uncharacterized protein ARMOST_08914 [Armillaria ostoyae]
g317	41202	41982	0.54	+		KTB31461.1	29.4	126	83	3	17	140	31	152	1.4e-05	60.1	hypothetical protein WG66_15967 [Moniliophthora roreri]
g318	42315	43216	0.27	+
g319	43398	44611	0.93	-
g320	45078	47142	0.61	+
g321	47465	53055	0.07	+		PBL00394.1	40.3	1274	641	35	274	1474	1	1227	1.9e-225	793.1	S-adenosyl-L-methionine-dependent methyltransferase [Armillaria gallica]
g322	53397	54266	0.66	-		KIY62635.1	62.8	215	71	2	1	210	1	211	1.1e-65	259.6	hypothetical protein CYLTODRAFT_383345 [Cylindrobasidium torrendii FP15055 ss-10]
g323	54585	57790	0.22	+		PBK77380.1	61.4	874	266	21	2	807	10	880	1.7e-273	951.8	hypothetical protein ARMSODRAFT_904089 [Armillaria solidipes]
g324	58075	60292	0.62	+		PBK77381.1	76.6	582	132	1	21	602	42	619	3.9e-246	860.5	DUF1212-domain-containing protein [Armillaria solidipes]
g325	61167	61997	0.47	+
g326	62445	66957	0.04	-		KIY62258.1	55.6	674	214	9	349	1015	45	640	4.9e-186	661.8	GMC oxidoreductase [Cylindrobasidium torrendii FP15055 ss-10]
g327	72200	75326	0.06	+		KIY70350.1	69.1	669	193	9	127	790	51	710	3.9e-241	844.3	cysteine proteinase [Cylindrobasidium torrendii FP15055 ss-10]
g328	75809	78164	0.44	-		KIO32631.1	26.5	676	340	20	8	558	114	757	1.7e-43	187.6	hypothetical protein M407DRAFT_18394 [Tulasnella calospora MUT 4182]
g329	78896	81543	0.11	-		TBU31318.1	31.3	588	340	15	73	608	8	583	1.8e-62	250.8	hypothetical protein BD311DRAFT_786655 [Dichomitus squalens]
g330	81692	84885	0.33	+		ACZ59473.1	100	215	0	0	630	844	3	217	5.5e-113	418.7	60S ribosomal protein I1-a [Flammulina velutipes]
g331	85203	87406	0.52	+		KIY70355.1	75.6	586	139	3	1	584	1	584	6.5e-278	966.1	glycoside hydrolase family 13 protein [Cylindrobasidium torrendii FP15055 ss-10]
g332	87526	88983	0.51	-		AQZ41232.1	53.5	370	158	4	19	377	1	367	4.4e-110	407.9	putative glucuronoyl esterase, partial [synthetic construct]
g333	2340	4061	0.55	-		KIY61956.1	35.5	363	224	5	39	392	85	446	1.7e-51	213.8	hypothetical protein CYLTODRAFT_415075 [Cylindrobasidium torrendii FP15055 ss-10]
g334	4399	5026	0.75	+
g335	5198	5953	0.81	+
g336	6164	6997	0.59	+
g337	7798	11742	0.21	+		KIY61963.1	36.8	1146	642	22	34	1140	7	1109	2.3e-194	689.5	hypothetical protein CYLTODRAFT_494956 [Cylindrobasidium torrendii FP15055 ss-10]
g338	234	781	0.38	+
g339	52	1481	0.45	+		KJA22341.1	30.3	185	109	9	173	353	192	360	2.1e-06	63.5	hypothetical protein HYPSUDRAFT_202156 [Hypholoma sublateritium FD-334 SS-4]
g340	982	2082	0.52	+		SJL12204.1	76.6	299	70	0	1	299	1	299	1.1e-127	466.1	related to Protein kti12 [Armillaria ostoyae]
g341	2310	4921	0.42	+		PBK93238.1	61.4	661	248	3	8	665	4	660	2.8e-240	841.3	phospholipase B [Armillaria gallica]
g342	5003	6730	0.05	-		KIY68038.1	26.9	375	229	12	93	448	41	389	8.6e-17	98.6	hypothetical protein CYLTODRAFT_453912 [Cylindrobasidium torrendii FP15055 ss-10]
g343	6917	10195	0.13	-		PBK93207.1	68.5	270	72	4	1	269	2	259	4.9e-94	355.9	hypothetical protein ARMGADRAFT_1053780 [Armillaria gallica]
g344	10844	12487	0.44	+		KIY63803.1	28.4	373	242	9	70	430	62	421	3.2e-21	113.2	hypothetical protein CYLTODRAFT_493624 [Cylindrobasidium torrendii FP15055 ss-10]
g345	12781	14177	0.15	-
g346	15517	16056	0.98	+		KIY68881.1	37.1	186	110	5	1	179	1	186	3.1e-13	85.1	hypothetical protein CYLTODRAFT_453123 [Cylindrobasidium torrendii FP15055 ss-10]
g347	17130	19482	0.54	+		KIY65569.1	71	599	163	7	3	598	4	594	1.7e-257	898.3	glycoside hydrolase family 16 protein [Cylindrobasidium torrendii FP15055 ss-10]
g348	19938	24568	0.41	-		SJL12257.1	29.2	1486	708	53	45	1265	92	1498	2.1e-90	344.4	uncharacterized protein ARMOST_15680 [Armillaria ostoyae]
g349	25083	26660	0.95	+		KIY63592.1	27.3	455	254	20	121	522	69	499	1.9e-15	94	hypothetical protein CYLTODRAFT_457960 [Cylindrobasidium torrendii FP15055 ss-10]
g350	26698	28302	0.4	-		KIY70436.1	35.6	495	272	9	10	496	11	466	2.7e-59	239.6	hypothetical protein CYLTODRAFT_392047 [Cylindrobasidium torrendii FP15055 ss-10]
g351	28992	30511	0.65	-		KIY70436.1	46.7	492	205	16	8	472	11	472	1.2e-72	283.9	hypothetical protein CYLTODRAFT_392047 [Cylindrobasidium torrendii FP15055 ss-10]
g352	2	2391	0.08	-		PBK97919.1	62.7	504	160	5	76	554	1	501	2.1e-177	632.1	cytochrome P450 [Armillaria gallica]
g353	2552	3517	0.83	+		KIY71741.1	50.8	323	153	4	2	321	11	330	5.1e-83	317.8	phosphatases II [Cylindrobasidium torrendii FP15055 ss-10]
g354	3833	6642	0.57	+		KIY71698.1	73.3	756	188	6	2	749	27	776	0	1082.4	RNA-binding domain-containing protein [Cylindrobasidium torrendii FP15055 ss-10]
g355	7787	8554	0.47	+		KIY71700.1	36.1	238	138	8	10	236	12	246	2.5e-16	95.9	hypothetical protein CYLTODRAFT_418605 [Cylindrobasidium torrendii FP15055 ss-10]
g356	9002	12650	0.01	+		PBK78349.1	69.6	425	125	1	355	775	19	443	2.7e-170	609	phosphoglycerate mutase-like protein [Armillaria solidipes]
g357	12823	13926	0.68	-		SJL00583.1	50	216	86	7	11	204	10	225	1.4e-38	169.9	uncharacterized protein ARMOST_03896 [Armillaria ostoyae]
g358	13989	14843	0.41	+		PBK97924.1	37	238	121	8	4	226	2	225	2.2e-19	105.9	hypothetical protein ARMGADRAFT_661653 [Armillaria gallica]
g359	15011	16820	0.46	+		AOC97457.1	96.7	458	15	0	75	532	1	458	9.7e-257	895.6	alpha-amylase [Flammulina velutipes]
g360	17178	18496	0.39	-		KIY67051.1	80	400	59	1	1	400	1	379	1.2e-193	685.6	alpha/beta-hydrolase [Cylindrobasidium torrendii FP15055 ss-10]
g361	19320	20359	0.61	+		PBK68038.1	79.3	276	57	0	1	276	1	276	7.1e-118	433.3	NAD(P)-binding protein [Armillaria solidipes]
g362	20476	21734	0.54	+		PPQ72713.1	82.6	368	64	0	1	368	273	640	1.9e-174	621.7	hypothetical protein CVT26_003008 [Gymnopilus dilepis]
g363	22106	23315	0.26	+		KIY67141.1	39.9	253	149	1	57	309	21	270	3e-48	202.2	hypothetical protein CYLTODRAFT_14835 [Cylindrobasidium torrendii FP15055 ss-10]
g364	23459	24313	0.16	-		KIY71713.1	65.8	237	80	1	1	236	131	367	4.3e-90	340.9	hypothetical protein CYLTODRAFT_450559 [Cylindrobasidium torrendii FP15055 ss-10]
g365	25771	28704	0.07	+		PBK58826.1	45.3	716	337	14	10	674	17	728	4.8e-163	584.7	hypothetical protein ARMSODRAFT_967413 [Armillaria solidipes]
g366	30945	31997	0.45	-		PBK97814.1	86.5	133	15	1	1	130	114	246	8.7e-63	250.4	hypothetical protein ARMGADRAFT_987792 [Armillaria gallica]
g367	32120	32380	0.54	-		KIY71710.1	85.7	84	12	0	1	84	1	84	1.6e-31	144.8	hypothetical protein CYLTODRAFT_429350 [Cylindrobasidium torrendii FP15055 ss-10]
g368	32550	34670	0.57	+		PBK74726.1	40.8	649	376	5	58	701	106	751	2e-132	483	hypothetical protein ARMSODRAFT_950757 [Armillaria solidipes]
g369	35140	37958	0.08	+		PBK97812.1	78.9	688	126	10	1	673	1	684	5.7e-302	1046.2	hypothetical protein ARMGADRAFT_1060882 [Armillaria gallica]
g370	41786	47587	0.05	+		SJL07386.1	65.5	1591	431	24	1	1529	1	1535	0	1993	related to SPO14-phospholipase D [Armillaria ostoyae]
g371	47742	48881	0.77	-		PBK74714.1	78.8	293	57	1	1	293	1	288	1.1e-129	472.6	F-actin capping protein, alpha subunit [Armillaria solidipes]
g372	1	1368	0.08	+
g373	2478	3138	0.24	+		AOV80989.1	97.7	131	3	0	1	131	1	131	3.8e-61	243.8	hydrophobin [Flammulina velutipes]
g374	3365	7873	0.17	-		SJL00766.1	45.9	645	304	13	596	1226	240	853	6.3e-150	542	uncharacterized protein ARMOST_04080 [Armillaria ostoyae]
g375	8237	9576	0.63	-		GAW08621.1	29.7	323	202	9	74	381	113	425	2.7e-36	162.9	hypothetical protein LENED_010690 [Lentinula edodes]
g376	11155	13254	0.11	-		KIY62526.1	69.7	545	145	3	1	528	1	542	2.4e-231	811.2	peptidase S28 [Cylindrobasidium torrendii FP15055 ss-10]
g377	13874	15407	0.18	-		KIY71669.1	36.5	479	257	9	1	456	41	495	8e-69	271.2	hypothetical protein CYLTODRAFT_486962 [Cylindrobasidium torrendii FP15055 ss-10]
g378	16453	17827	0.12	+
g379	19401	21067	0.37	+
g380	2	839	0.68	-		KIY68320.1	50.6	176	86	1	9	183	1	176	5.6e-37	164.1	FAD/NAD(P)-binding domain-containing protein [Cylindrobasidium torrendii FP15055 ss-10]
g381	735	1012	0.79	-
g382	1	1488	0.02	-		KIY64472.1	33.5	260	146	6	48	296	284	527	4.6e-30	141.7	hypothetical protein CYLTODRAFT_380853 [Cylindrobasidium torrendii FP15055 ss-10]
g383	2443	4726	0.19	-		KIY64472.1	40.6	545	267	6	17	535	20	533	9e-112	414.1	hypothetical protein CYLTODRAFT_380853 [Cylindrobasidium torrendii FP15055 ss-10]
g384	5602	12538	0.01	-		PPQ67518.1	63	912	272	13	274	1155	11	887	4.1e-308	1067.8	hypothetical protein CVT25_006059 [Psilocybe cyanescens]
g385	13085	18772	0.04	+		TFK79619.1	42.5	1246	610	21	13	1159	38	1275	2.4e-244	855.9	hypothetical protein K466DRAFT_668051 [Polyporus arcularius HHB13444]
g386	18951	20547	0.35	-		KIY71502.1	68.2	516	114	9	1	479	1	503	2.2e-183	651.7	hypothetical protein CYLTODRAFT_390145 [Cylindrobasidium torrendii FP15055 ss-10]
g387	20777	22976	0.19	+		KIY64180.1	51.5	441	194	9	160	583	1	438	9.3e-75	291.2	hypothetical protein CYLTODRAFT_457460 [Cylindrobasidium torrendii FP15055 ss-10]
g388	23120	25064	0.62	-		PBK95722.1	67.9	368	118	0	16	383	22	389	2.2e-145	525.4	hypothetical protein ARMGADRAFT_744063 [Armillaria gallica]
g389	26327	28188	0.15	-		KIY64179.1	62.2	357	131	2	19	375	28	380	8.3e-121	443.7	hypothetical protein CYLTODRAFT_493343 [Cylindrobasidium torrendii FP15055 ss-10]
g390	28843	30545	0.03	-		KIY64179.1	53.2	355	149	5	1	345	33	380	1.6e-89	339.7	hypothetical protein CYLTODRAFT_493343 [Cylindrobasidium torrendii FP15055 ss-10]
g391	31206	32709	0.3	+		KIY64175.1	64.9	367	110	9	53	411	1	356	6.1e-57	231.5	hypothetical protein CYLTODRAFT_493339 [Cylindrobasidium torrendii FP15055 ss-10]
g392	33018	35681	0.3	-		SJL09745.1	46.7	865	372	21	16	808	10	857	1.7e-148	536.6	uncharacterized protein ARMOST_13126 [Armillaria ostoyae]
g393	35781	37699	0.52	+		PBK67883.1	58	662	222	19	1	623	1	645	1.2e-120	443.7	hypothetical protein ARMSODRAFT_976614 [Armillaria solidipes]
g394	38403	39116	0.51	+		KIY64166.1	55.8	86	36	1	3	88	15	98	1e-16	97.1	hypothetical protein CYLTODRAFT_493331 [Cylindrobasidium torrendii FP15055 ss-10]
g395	39744	42381	0.31	-		PBL03507.1	75.7	687	134	5	1	686	1	655	0	1069.3	methionyl-tRNA synthetase [Armillaria gallica]
g396	45348	46844	0.09	+		XP_007331671.1	43.7	375	187	5	13	378	18	377	1.2e-83	320.1	hypothetical protein AGABI1DRAFT_130117 [Agaricus bisporus var. burnettii JB137-S8]
g397	47567	48662	0.35	+
g398	51561	55035	0.04	-		PBL01971.1	64.9	974	314	9	54	1006	3	969	0	1213.7	hypothetical protein ARMGADRAFT_1071476 [Armillaria gallica]
g399	55661	57953	0.56	-		KIY64182.1	77.6	664	121	7	5	663	10	650	4.5e-275	956.8	Pkinase-domain-containing protein [Cylindrobasidium torrendii FP15055 ss-10]
g400	59859	61341	0.41	+		KIY64174.1	67.4	350	114	0	1	350	4	353	1.3e-140	509.2	alpha/beta-hydrolase [Cylindrobasidium torrendii FP15055 ss-10]
g401	61401	63329	0.22	-		KIY64173.1	90.6	235	22	0	192	426	1	235	6.4e-118	434.1	armadillo/beta-catenin/plakoglobin [Cylindrobasidium torrendii FP15055 ss-10]
g402	303	1774	0.13	+		PPQ71065.1	57.4	303	124	2	118	416	177	478	9.3e-93	350.5	hypothetical protein CVT26_011467, partial [Gymnopilus dilepis]
g403	1057	2697	0.93	+
g404	1056	1786	0.14	+
g405	385	933	0.47	-		GAT48941.1	51.6	155	56	4	1	143	290	437	3e-32	148.3	predicted protein [Mycena chlorophos]
g406	24	1155	0.34	+		SJL03509.1	36.2	378	193	16	7	353	6	366	8.9e-36	161	uncharacterized protein ARMOST_06865 [Armillaria ostoyae]
g407	1773	2797	0.59	-		KIY67311.1	67.7	266	84	2	18	282	40	304	9.2e-97	363.2	NAD(P)-binding protein [Cylindrobasidium torrendii FP15055 ss-10]
g408	3175	4140	0.15	+		TFK55087.1	43.7	215	119	1	12	224	42	256	4.5e-49	204.5	hypothetical protein OE88DRAFT_997628 [Heliocybe sulcata]
g409	4425	5416	0.66	-		OJA16605.1	34.6	280	147	8	12	262	47	319	1.1e-29	140.6	hypothetical protein AZE42_09257 [Rhizopogon vesiculosus]
g410	6496	9576	0.25	+		KIY67528.1	58.7	247	99	2	1	245	1	246	1.3e-70	278.1	tetrapyrrole biosynthesis, uroporphyrinogen III synthase [Cylindrobasidium torrendii FP15055 ss-10]
g411	9698	10402	0.43	+
g412	14818	15777	0.25	+
g413	16004	25283	0.01	+		PBK82115.1	86.2	734	98	1	3	733	2	735	0	1297	P-loop containing nucleoside triphosphate hydrolase protein [Armillaria gallica]
g414	28640	30699	0.41	-		KIK69907.1	80.6	573	106	3	1	573	1	568	4.6e-260	906.7	hypothetical protein GYMLUDRAFT_212825 [Gymnopus luxurians FD-317 M1]
g415	31056	32952	0.1	+		KIY68109.1	45.9	85	41	2	222	301	176	260	2.3e-08	69.7	Aldo/keto reductase [Cylindrobasidium torrendii FP15055 ss-10]
g416	34764	35681	0.93	-		KIY65088.1	73.1	219	47	1	1	207	1	219	1.1e-86	329.7	hypothetical protein CYLTODRAFT_424661 [Cylindrobasidium torrendii FP15055 ss-10]
g417	35829	39387	0.72	-		SJL03516.1	89.3	1163	106	3	1	1150	1	1158	0	1838.5	probable splicing factor 3b subunit 1 [Armillaria ostoyae]
g418	40249	41447	0.89	+		KXN91968.1	83.7	331	54	0	1	331	1	331	1.3e-150	542.3	Ribose-phosphate pyrophosphokinase 2 [Leucoagaricus sp. SymC.cos]
g419	41924	46548	0.07	-		PBK60492.1	75.8	1399	256	15	1	1326	1	1390	0	1907.1	hypothetical protein ARMSODRAFT_966082 [Armillaria solidipes]
g420	47409	47915	0.98	-		GAT46755.1	76.7	116	27	0	1	116	1	116	3.4e-37	164.1	vacuolar ATP synthase subunit [Mycena chlorophos]
g421	48030	52253	0.2	+		PBK99225.1	68.2	1200	320	13	2	1175	12	1175	0	1479.9	hypothetical protein ARMGADRAFT_958417 [Armillaria gallica]
g422	354	2173	0.69	-		KIY67533.1	60.7	448	142	9	1	443	1	419	8.1e-126	460.7	Mob1/phocein [Cylindrobasidium torrendii FP15055 ss-10]
g423	2463	3647	0.55	+		KIY69041.1	61.1	324	124	2	1	323	1	323	1.4e-112	416	hypothetical protein CYLTODRAFT_452975 [Cylindrobasidium torrendii FP15055 ss-10]
g424	3713	7633	0.46	-		PBK94825.1	48.1	599	213	22	15	549	3	567	1.5e-114	424.5	hypothetical protein ARMGADRAFT_1011701 [Armillaria gallica]
g425	8074	9553	0.07	+		KIK70039.1	41.8	311	150	6	1	302	17	305	1.2e-50	210.3	hypothetical protein GYMLUDRAFT_34478 [Gymnopus luxurians FD-317 M1]
g426	11830	14561	0.12	-		KIY63435.1	77.9	348	74	1	292	636	1	348	9.8e-161	577	Dihydroorotase [Cylindrobasidium torrendii FP15055 ss-10]
g427	15176	16076	0.06	-		KIY66015.1	62.9	143	48	1	87	229	47	184	1.4e-45	193	hypothetical protein CYLTODRAFT_399491 [Cylindrobasidium torrendii FP15055 ss-10]
g428	16441	21470	0.1	+		RDB18406.1	45.3	457	249	1	335	791	43	498	3.5e-114	422.9	hypothetical protein Hypma_000372 [Hypsizygus marmoreus]
g429	22037	25462	0.33	-		KIY66014.1	54	1190	383	23	1	1090	11	1136	8.5e-223	783.9	hypothetical protein CYLTODRAFT_455796 [Cylindrobasidium torrendii FP15055 ss-10]
g430	26827	27232	0.32	+		PBK74419.1	55.7	115	35	4	1	99	63	177	9.4e-20	105.9	Ctr copper transporter [Armillaria solidipes]
g431	27832	32375	0.15	-		KZT07523.1	54.8	584	240	10	679	1253	1	569	4.8e-161	578.9	hypothetical protein LAESUDRAFT_114042 [Laetiporus sulphureus 93-53]
g432	32964	35789	0.48	-		PBL02779.1	90.7	162	15	0	582	743	1	162	8.7e-78	301.6	cyclophilin, partial [Armillaria gallica]
g433	36696	38156	0.19	+		PBK99630.1	31.5	429	203	19	45	404	9	415	1.4e-14	90.9	hypothetical protein ARMGADRAFT_1161253 [Armillaria gallica]
g434	40611	43030	0.59	+		KIY66007.1	67.2	682	222	2	7	686	5	686	3.4e-278	967.2	hypothetical protein CYLTODRAFT_423832 [Cylindrobasidium torrendii FP15055 ss-10]
g435	43137	45585	0.05	-		PBK74414.1	67.3	306	82	2	211	516	67	354	1.1e-119	440.3	hypothetical protein ARMSODRAFT_588579 [Armillaria solidipes]
g436	46153	48055	0.41	+		PBK61624.1	63.1	556	186	3	9	564	6	542	1.2e-209	739.2	amidase signature enzyme [Armillaria solidipes]
g437	48460	51630	0.45	-		PBK61619.1	57.2	1024	315	33	1	954	1	971	1.7e-222	782.7	hypothetical protein ARMSODRAFT_981381 [Armillaria solidipes]
g438	52164	53813	0.2	-		KIY66002.1	73.9	394	102	1	1	394	1	393	5.8e-178	633.6	alpha/beta-hydrolase [Cylindrobasidium torrendii FP15055 ss-10]
g439	54126	59253	0.03	+		KIY67059.1	45.4	857	406	13	339	1173	1	817	1.1e-194	690.6	hypothetical protein CYLTODRAFT_376814 [Cylindrobasidium torrendii FP15055 ss-10]
g440	59642	61657	0.23	+		KIY65999.1	49.8	570	253	6	88	629	2	566	3.3e-134	488.8	hypothetical protein CYLTODRAFT_455780 [Cylindrobasidium torrendii FP15055 ss-10]
g441	61940	62786	0.79	-		ESK91746.1	51.9	233	105	3	1	226	1	233	4e-58	234.6	short chain type [Moniliophthora roreri MCA 2997]
g442	64163	65956	0.82	+		PBK76022.1	51.7	576	216	18	1	542	1	548	2e-95	359.8	hypothetical protein ARMSODRAFT_950395 [Armillaria solidipes]
g443	66491	71475	0.01	-		PPQ73621.1	42.4	1069	574	23	30	1080	601	1645	2e-232	815.8	hypothetical protein CVT24_007620 [Panaeolus cyanescens]
g444	71927	74031	0.04	-		SJL04411.1	50.8	482	231	5	34	511	2	481	6.5e-136	494.2	uncharacterized protein ARMOST_07777 [Armillaria ostoyae]
g445	75430	77656	0.14	-		SJL04411.1	47.5	495	243	6	33	514	2	492	1.7e-134	489.6	uncharacterized protein ARMOST_07777 [Armillaria ostoyae]
g446	78130	80339	0.26	-		SJL04411.1	49.9	493	235	7	37	519	2	492	2.3e-139	505.8	uncharacterized protein ARMOST_07777 [Armillaria ostoyae]
g447	80772	81167	0.42	+
g448	2	1690	0.27	-		SJL13933.1	33.1	350	194	10	143	479	130	452	6.3e-37	165.2	uncharacterized protein ARMOST_17384 [Armillaria ostoyae]
g449	1	716	0.71	+		PBK93062.1	56.1	239	103	2	1	237	301	539	1.1e-69	273.1	alpha/beta-hydrolase [Armillaria gallica]
g450	2	1857	0.27	-		KIY61741.1	53.8	318	134	4	4	313	10	322	1.9e-80	309.3	hypothetical protein CYLTODRAFT_427363 [Cylindrobasidium torrendii FP15055 ss-10]
g451	2318	6631	0.26	-		KIY62208.1	81.3	1219	224	4	1	1217	1	1217	0	1839.3	TIP120-domain-containing protein [Cylindrobasidium torrendii FP15055 ss-10]
g452	7483	7993	0.12	+		PBK58256.1	55.6	133	54	2	9	136	4	136	7.7e-33	149.8	hypothetical protein ARMSODRAFT_967883 [Armillaria solidipes]
g453	8198	13456	0.14	-		PBK60168.1	64.7	1389	482	4	14	1399	57	1439	0	1842.8	hypothetical protein ARMSODRAFT_898410 [Armillaria solidipes]
g454	14287	17187	0.26	-		PBK89159.1	66.7	963	275	19	1	931	1	949	3.3e-207	731.9	hypothetical protein ARMGADRAFT_1033260 [Armillaria gallica]
g455	19819	22338	0.13	+		PBK96087.1	58.8	371	108	3	135	503	1	328	2.4e-104	389.4	zincin [Armillaria gallica]
g456	23390	25277	0.21	+		KIY61741.1	58.5	311	121	3	6	308	12	322	7.9e-92	347.1	hypothetical protein CYLTODRAFT_427363 [Cylindrobasidium torrendii FP15055 ss-10]
g457	26959	34784	0.11	+		XP_003027160.1	57.3	2411	735	20	39	2413	7	2158	0	2314.3	hypothetical protein SCHCODRAFT_258691 [Schizophyllum commune H4-8]
g458	35666	36452	0.69	-		PBK79833.1	40.7	209	98	6	14	216	2	190	8.8e-26	127.1	hypothetical protein ARMGADRAFT_100162 [Armillaria gallica]
g459	38662	39376	0.77	+		KIY61744.1	82	178	30	1	1	178	1	176	2.1e-78	301.6	hypothetical protein CYLTODRAFT_427366, partial [Cylindrobasidium torrendii FP15055 ss-10]
g460	40208	41249	0.23	-
g461	42069	43876	0.61	-		KIY61774.1	81.3	477	89	0	5	481	8	484	6.4e-231	809.7	MFS general substrate transporter [Cylindrobasidium torrendii FP15055 ss-10]
g462	44769	46871	0.3	-		KIY62312.1	24.5	697	423	25	3	636	11	667	8.2e-32	148.7	hypothetical protein CYLTODRAFT_494726, partial [Cylindrobasidium torrendii FP15055 ss-10]
g463	47195	47855	0.98	+
g464	51892	53149	0.08	+
g465	53437	54003	0.13	+
g466	54241	55436	0.08	+
g467	56679	59637	0.3	-		KIY62780.1	36.1	574	331	12	32	596	59	605	4.4e-79	306.2	hypothetical protein CYLTODRAFT_458696 [Cylindrobasidium torrendii FP15055 ss-10]
g468	59908	63128	0.02	-
g469	1	538	0.33	-
g470	1	847	0.3	+
g471	1	1853	0.06	+		PBK87932.1	32.8	302	76	10	27	204	61	359	6.4e-18	100.9	glycoside hydrolase family 16 protein [Armillaria gallica]
g472	1	4905	0.03	+		XP_027609819.1	43.5	835	365	8	606	1339	2	830	1.1e-185	661	Retrovirus-related Pol polyprotein from transposon 412 [Sparassis crispa]
g473	4968	5974	0.42	+		XP_027609818.1	52.5	301	98	2	14	270	1	300	6.2e-80	307.4	hypothetical protein SCP_0201020 [Sparassis crispa]
g474	2183	2461	0.29	-
g475	4314	6434	0.34	+		KIK53172.1	49.4	419	205	3	125	542	114	526	1.6e-108	403.3	hypothetical protein GYMLUDRAFT_942491 [Gymnopus luxurians FD-317 M1]
g476	6904	8660	0.2	-
g477	11025	13315	0.28	+		KIK53172.1	45.6	609	314	7	39	640	97	695	2.4e-143	519.2	hypothetical protein GYMLUDRAFT_942491 [Gymnopus luxurians FD-317 M1]
g478	2	182	0.8	-		XP_007763113.1	86.4	59	8	0	1	59	589	647	1.5e-20	107.8	beta and beta-prime subunits of DNA dependent RNA-polymerase [Coniophora puteana RWD-64-598 SS2]
g479	1	490	0.81	+		AOV80985.1	95.4	87	4	0	1	87	26	112	9.3e-40	172.2	hydrophobin [Flammulina velutipes]
g480	1112	2572	0.29	+		ADX07331.1	41.2	410	190	13	43	443	670	1037	5.5e-51	211.8	putative hydrophobin [Flammulina velutipes]
g481	1	890	0.21	+
g482	1587	2490	0.15	-
g483	2917	3445	0.67	+
g484	4054	7314	0.52	+		SJL04778.1	30.4	915	512	24	85	930	90	948	9e-81	312	uncharacterized protein ARMOST_08148 [Armillaria ostoyae]
g485	2	2641	0.13	-		TEB10746.1	20.8	212	158	3	207	415	612	816	0.00061	56.2	hypothetical protein FA13DRAFT_1806247 [Coprinellus micaceus]
g486	2789	11048	0.03	-		OBZ66042.1	29.4	1476	899	38	828	2270	4	1369	8.9e-158	568.9	ATP-dependent DNA helicase tlh2 [Grifola frondosa]
g487	11164	12217	0.58	+
g488	292	2285	0.12	+		XP_007328498.1	67	424	140	0	10	433	14	437	2e-167	598.6	hypothetical protein AGABI1DRAFT_112644 [Agaricus bisporus var. burnettii JB137-S8]
g489	5431	8797	0.24	+		PBK91622.1	56.9	1104	402	33	9	1050	1	1092	3.7e-276	961.1	hypothetical protein ARMGADRAFT_968434 [Armillaria gallica]
g490	9006	9931	0.39	-		EOD50927.1	61	269	101	3	1	267	118	384	6.3e-87	330.5	putative sirq protein [Neofusicoccum parvum UCRNP2]
g491	10013	10309	0.31	-		PVH73411.1	57.8	102	37	2	2	97	3	104	4.3e-25	123.6	hypothetical protein DL98DRAFT_469359 [Cadophora sp. DSE1049]
g492	11715	16230	0.12	+		PBK91621.1	61.6	1354	423	34	1	1304	26	1332	0	1379.4	hypothetical protein ARMGADRAFT_1166428 [Armillaria gallica]
g493	87	6291	0.01	-		KTB28717.1	32.8	772	412	25	399	1155	66	745	1.4e-96	364.8	hypothetical protein WG66_18722 [Moniliophthora roreri]
g494	6753	7568	0.51	-		KIY63322.1	46.6	238	111	2	4	237	187	412	1.8e-48	202.6	hypothetical protein CYLTODRAFT_494000 [Cylindrobasidium torrendii FP15055 ss-10]
g495	2391	4656	0.3	+		PBK84848.1	66.7	541	157	7	6	535	8	536	4.5e-193	684.1	cytochrome P450 [Armillaria gallica]
g496	5702	6891	0.42	+		PBK86433.1	44.8	391	190	12	1	372	1	384	3.3e-65	258.8	hypothetical protein ARMGADRAFT_1169159 [Armillaria gallica]
g497	2651	3594	0.15	-		PBK73870.1	78.7	202	43	0	3	204	2	203	1.5e-87	332.4	RraA-like protein [Armillaria solidipes]
g498	3671	5640	0.53	+		PBK91415.1	66.1	549	157	5	3	523	2	549	7e-199	703.4	RabGAP/TBC [Armillaria gallica]
g499	5673	7686	0.82	-		SJK97443.1	39.6	642	252	16	7	609	18	562	2.4e-57	233.4	uncharacterized protein ARMOST_00695 [Armillaria ostoyae]
g500	8061	9894	0.87	+		KIY74358.1	77.7	529	109	3	1	528	1	521	9.4e-228	799.3	galactokinase gal [Cylindrobasidium torrendii FP15055 ss-10]
g501	10105	11433	0.17	-		PBK73867.1	40.6	446	245	10	11	442	44	483	4.4e-77	298.5	hypothetical protein ARMSODRAFT_652353 [Armillaria solidipes]
g502	12027	13778	0.16	-		PBK95451.1	37.5	592	294	14	6	526	5	591	4.2e-66	262.3	hypothetical protein ARMGADRAFT_1164022 [Armillaria gallica]
g503	14327	15185	0.88	-		KIY74348.1	70	200	59	1	6	205	3	201	4.5e-77	297.4	hypothetical protein CYLTODRAFT_385158 [Cylindrobasidium torrendii FP15055 ss-10]
g504	15645	16209	1	+		PBK67795.1	70.2	151	43	1	1	151	1	149	1.7e-52	215.3	HSP20-like chaperone [Armillaria solidipes]
g505	1	1342	0.1	+		PBK99161.1	37.5	291	141	6	2	255	54	340	2.8e-39	172.2	cytochrome P450 [Armillaria gallica]
g506	2	292	0.51	-		PBK61280.1	78.2	78	17	0	1	78	1	78	3.3e-28	133.7	ARM repeat-containing protein [Armillaria solidipes]
g507	465	950	0.35	+		RKF61612.1	90.1	81	8	0	23	103	73	153	3.4e-34	154.1	Serine/threonine-protein phosphatase PP1 [Oidium neolycopersici]
g508	285	873	0.64	+		PBL01191.1	70.3	155	46	0	1	155	50	204	2e-59	238.4	hypothetical protein ARMGADRAFT_415350 [Armillaria gallica]
g509	166	2430	0.09	+		KIY67480.1	77.6	501	104	2	73	571	54	548	1.3e-219	772.3	GTP-binding protein Obg/CgtA [Cylindrobasidium torrendii FP15055 ss-10]
g510	2629	5242	0.12	+		KIY63476.1	70.2	699	193	5	1	698	1	685	5.4e-223	783.9	hypothetical protein CYLTODRAFT_403191 [Cylindrobasidium torrendii FP15055 ss-10]
g511	5393	6293	0.12	-		KIY63477.1	70.6	177	47	3	40	215	1	173	4.5e-43	184.5	ClpS-like protein [Cylindrobasidium torrendii FP15055 ss-10]
g512	6455	8093	0.06	-		KIK65632.1	52.6	306	112	5	10	308	13	292	5.4e-78	301.2	hypothetical protein GYMLUDRAFT_240138 [Gymnopus luxurians FD-317 M1]
g513	10027	12131	0.1	+		SJL01615.1	60.3	312	112	4	31	335	58	364	8.1e-87	330.5	uncharacterized protein ARMOST_04938 [Armillaria ostoyae]
g514	12908	16080	0.3	+		PBK72956.1	76.4	488	107	4	3	485	50	534	1.4e-220	775.8	cytochrome P450 [Armillaria solidipes]
g515	16429	18004	0.04	-
g516	18735	21300	0.71	-		KIY71781.1	50.7	817	342	20	13	819	12	777	1.1e-185	660.2	hypothetical protein CYLTODRAFT_486897 [Cylindrobasidium torrendii FP15055 ss-10]
g517	22113	24174	0.64	-		PBL02147.1	71.3	694	163	9	1	669	1	683	4.4e-230	807.4	hypothetical protein ARMGADRAFT_980595 [Armillaria gallica]
g518	25535	26854	0.59	-		SJL11127.1	32.6	319	179	10	5	302	24	327	8.4e-32	147.9	uncharacterized protein ARMOST_14530 [Armillaria ostoyae]
g519	515	4834	0.44	-		KIY61672.1	88	510	61	0	1	510	1	510	2.5e-272	948.3	catalase [Cylindrobasidium torrendii FP15055 ss-10]
g520	6264	6761	0.05	+		PBK72099.1	49.7	143	55	1	1	143	1	126	2.7e-23	118.2	hypothetical protein ARMSODRAFT_953779 [Armillaria solidipes]
g521	2	1388	0.71	-
g522	1661	2232	0.18	+
g523	47	625	0.09	+
g524	1	571	0.63	-
g525	2	803	0.82	-		PPQ84978.1	43.3	120	66	2	133	251	113	231	6.4e-17	97.8	hypothetical protein CVT25_010531 [Psilocybe cyanescens]
g526	1	833	0.95	+
g527	2072	3653	0.11	-		XP_007313567.1	30.7	313	185	12	2	294	16	316	2e-28	136.7	hypothetical protein SERLADRAFT_412873 [Serpula lacrymans var. lacrymans S7.9]
g528	4870	5238	0.37	-		KIY68136.1	73.6	106	26	1	1	104	1	106	2.5e-39	171	ubiquitin-related modifier 1 [Cylindrobasidium torrendii FP15055 ss-10]
g529	5764	8271	0.07	+		PBK66691.1	33.3	360	208	7	12	353	12	357	1.4e-41	181	hypothetical protein ARMSODRAFT_977266 [Armillaria solidipes]
g530	8744	11864	0.99	-		KIY68035.1	63.5	947	317	12	1	936	1	929	3.9e-192	681.8	Utp14-domain-containing protein [Cylindrobasidium torrendii FP15055 ss-10]
g531	12159	13155	0.19	+		PBK67650.1	65.9	167	48	2	100	266	22	179	9.7e-56	226.9	hypothetical protein ARMSODRAFT_888718 [Armillaria solidipes]
g532	13532	14120	0.15	-		KIY71191.1	33.6	107	66	4	22	124	3	108	2.8e-07	65.1	hypothetical protein CYLTODRAFT_487409 [Cylindrobasidium torrendii FP15055 ss-10]
g533	14431	16959	0.29	+		KIY68127.1	46.4	616	263	13	11	587	12	599	8.9e-122	447.6	hypothetical protein CYLTODRAFT_267864 [Cylindrobasidium torrendii FP15055 ss-10]
g534	1	2907	0.02	+		PBL00743.1	39.8	382	196	8	294	643	38	417	2.7e-54	223.4	hypothetical protein ARMGADRAFT_1006867 [Armillaria gallica]
g535	3601	4663	0.38	+		SJL06030.1	42	388	167	11	1	334	1	384	1.9e-56	229.6	uncharacterized protein ARMOST_09366 [Armillaria ostoyae]
g536	4769	5681	0.31	-		SJL17774.1	59.7	216	87	0	1	216	1	216	3.7e-77	297.7	uncharacterized protein ARMOST_21336 [Armillaria ostoyae]
g537	6011	7993	0.49	+		KIY72750.1	63.3	668	175	10	1	660	1	606	7.5e-190	673.7	hypothetical protein CYLTODRAFT_434554 [Cylindrobasidium torrendii FP15055 ss-10]
g538	9075	12321	0.34	-		KTB42852.1	51.6	920	308	19	6	881	10	836	7.6e-222	780.4	putative chondroitin AC/alginate lyase [Moniliophthora roreri]
g539	12548	15261	0.02	+		KIY72780.1	73.4	530	137	2	91	616	40	569	1.9e-232	815.1	acetyl-CoA synthetase-like protein [Cylindrobasidium torrendii FP15055 ss-10]
g540	15355	17346	0.43	-		PBK76967.1	86.5	489	66	0	48	536	25	513	1.3e-248	868.6	FAD-binding domain-containing protein [Armillaria solidipes]
g541	17514	21662	0.64	+		PBK76968.1	61.9	1358	475	22	5	1329	4	1352	0	1287.3	hypothetical protein ARMSODRAFT_926397 [Armillaria solidipes]
g542	21839	23528	0.64	+		KIY72777.1	60.3	459	162	6	7	462	5	446	2.8e-151	545	hypothetical protein CYLTODRAFT_6905 [Cylindrobasidium torrendii FP15055 ss-10]
g543	23558	25018	0.88	-		ESK98352.1	73.6	417	85	2	2	393	5	421	4.1e-167	597.4	cmgc cdk pitslre protein kinase [Moniliophthora roreri MCA 2997]
g544	25106	26888	0.58	+		PBK77208.1	93.6	424	27	0	1	424	1	424	5.5e-233	816.6	putative rRNA pseudouridine synthase [Armillaria solidipes]
g545	27251	29002	0.61	-		RXW24765.1	62.4	391	123	11	5	392	3	372	1.5e-121	446	hypothetical protein EST38_g1075 [Psathyrella aberdarensis]
g546	31320	32921	0.62	+		XP_001828839.2	90.9	363	33	0	1	363	1	363	9.8e-192	679.1	CMGC/MAPK protein kinase [Coprinopsis cinerea okayama7#130]
g547	33029	34874	0.5	-		PBL01000.1	42	617	248	18	7	528	6	607	3.1e-45	193	hypothetical protein ARMGADRAFT_405231 [Armillaria gallica]
g548	35056	40249	0.01	+		GAT58985.1	49.1	1433	563	36	4	1317	3	1387	0	1082.8	predicted protein [Mycena chlorophos]
g549	40763	43276	0.19	+		PBL00969.1	43.5	819	356	24	8	762	9	784	3.8e-137	498.8	hypothetical protein ARMGADRAFT_1160231 [Armillaria gallica]
g550	43440	44273	0.76	+		KIY72838.1	72	211	56	1	1	211	1	208	1.2e-75	292.7	DnaJ-domain-containing protein [Cylindrobasidium torrendii FP15055 ss-10]
g551	44476	50019	0.23	-		PBK77205.1	60.8	1645	552	26	1	1594	1	1603	0	1693.3	hypothetical protein ARMSODRAFT_949107 [Armillaria solidipes]
g552	50641	52730	0.51	-		PBK77204.1	90.6	499	40	2	1	492	1	499	1e-252	882.1	fumarate hydratase [Armillaria solidipes]
g553	52900	54166	0.32	+		KIY72841.1	69	239	63	2	1	229	4	241	7.8e-86	326.6	peroxisomal biogenesis factor 11 [Cylindrobasidium torrendii FP15055 ss-10]
g554	54216	54622	0.89	-		PBK77202.1	80.9	94	18	0	1	94	1	94	4.2e-36	160.2	hypothetical protein ARMSODRAFT_949103 [Armillaria solidipes]
g555	54725	57527	0.09	+		KIY72843.1	78.4	380	75	2	6	379	2	380	8e-169	604	mitochondrial Lipoyl synthase [Cylindrobasidium torrendii FP15055 ss-10]
g556	57596	62980	0.02	-		OJA10823.1	54.8	1305	506	18	2	1248	3	1281	0	1225.7	hypothetical protein AZE42_00288 [Rhizopogon vesiculosus]
g557	63116	66181	0.07	+		PPR00646.1	49.7	841	355	19	6	816	9	811	4e-148	535.4	hypothetical protein CVT24_000869 [Panaeolus cyanescens]
g558	66577	68988	0.47	+		PBK75033.1	72.4	290	75	2	1	290	1	285	2.4e-113	419.5	mRNA capping enzyme [Armillaria solidipes]
g559	69098	70617	0.41	-		PBK98220.1	66.2	331	99	5	1	323	1	326	1.5e-111	412.5	taurine catabolism dioxygenase [Armillaria gallica]
g560	70874	72327	0.86	+		SJL12137.1	50.8	423	179	5	49	444	7	427	8.3e-116	427.2	uncharacterized protein ARMOST_15558 [Armillaria ostoyae]
g561	72441	72951	0.06	-		KIN08582.1	37	92	26	2	26	85	89	180	0.00031	54.3	hypothetical protein OIDMADRAFT_16691 [Oidiodendron maius Zn]
g562	73650	75291	0.62	+		SJL05787.1	64.1	507	168	9	13	511	5	505	6.3e-160	573.9	uncharacterized protein ARMOST_09123 [Armillaria ostoyae]
g563	75316	76236	0.94	-		PBL00982.1	60.8	222	64	8	1	212	1	209	5e-47	197.6	hypothetical protein ARMGADRAFT_1073303 [Armillaria gallica]
g564	76360	77840	0.56	+		PBK77192.1	68.4	395	107	9	30	415	26	411	2.4e-133	485.3	hypothetical protein ARMSODRAFT_949092 [Armillaria solidipes]
g565	78156	83395	0.04	-		PBK60545.1	73.2	923	246	1	6	927	7	929	0	1448	glycoside hydrolase family 3 protein [Armillaria solidipes]
g566	83945	84486	0.39	+		KIY72850.1	44.4	133	72	2	11	142	50	181	4.2e-16	94.4	hypothetical protein CYLTODRAFT_417627 [Cylindrobasidium torrendii FP15055 ss-10]
g567	84591	86993	0.96	-		PBK77189.1	56.9	731	274	17	57	764	58	770	2.1e-172	615.9	hypothetical protein ARMSODRAFT_999533 [Armillaria solidipes]
g568	87163	88142	0.79	+		PBK77188.1	40.8	321	162	9	2	304	3	313	5.3e-53	218	hypothetical protein ARMSODRAFT_949087, partial [Armillaria solidipes]
g569	88442	90318	0.7	-		PBK77187.1	71.5	534	151	1	1	534	1	533	2.4e-231	811.2	acetyl-CoA synthetase-like protein [Armillaria solidipes]
g570	91674	94001	1	+		SJL05795.1	45.3	771	405	9	1	765	1	760	2.5e-136	496.1	uncharacterized protein ARMOST_09131 [Armillaria ostoyae]
g571	94060	95679	0.29	-		PBK77185.1	56.2	527	172	12	1	506	1	489	2.1e-128	469.2	hypothetical protein ARMSODRAFT_1012372 [Armillaria solidipes]
g572	95932	98526	0.6	-		KIY72856.1	82.2	734	129	2	1	732	1	734	0	1279.6	translation initiation factor eIF-3b [Cylindrobasidium torrendii FP15055 ss-10]
g573	98620	101115	0.05	+		PBL00972.1	38.6	712	373	17	1	690	1	670	1.5e-116	430.3	hypothetical protein ARMGADRAFT_1024812 [Armillaria gallica]
g574	101201	104255	0.91	-		PBL00971.1	71.6	835	220	5	1	831	1	822	7.6e-275	956.4	hypothetical protein ARMGADRAFT_1050963 [Armillaria gallica]
g575	104390	107002	0.07	+		RDB29516.1	45.1	565	232	10	3	521	21	553	4.8e-123	451.8	hypothetical protein Hypma_015424 [Hypsizygus marmoreus]
g576	107570	108513	0.05	+		KIY72865.1	91.3	196	13	1	1	192	1	196	2.6e-98	367.9	small GTPase rac1p [Cylindrobasidium torrendii FP15055 ss-10]
g577	116989	118972	0.05	-		ESK89309.1	60	450	170	4	18	459	61	508	6.7e-161	577	cytochrome p450 [Moniliophthora roreri MCA 2997]
g578	119332	126491	0.01	+		SJL05670.1	71.6	877	131	9	788	1654	1	769	0	1219.1	uncharacterized protein ARMOST_09006 [Armillaria ostoyae]
g579	126778	127554	0.77	-		PBK77302.1	33	203	120	4	15	208	10	205	7.3e-20	107.5	hypothetical protein ARMSODRAFT_1012476 [Armillaria solidipes]
g580	127696	130927	0.44	+		PBK77303.1	59.9	984	311	24	1	942	1	942	7e-266	926.8	hypothetical protein ARMSODRAFT_1079334 [Armillaria solidipes]
g581	131149	132779	0.21	-		SJL05666.1	55.8	455	174	6	1	449	1	434	4.6e-138	501.1	uncharacterized protein ARMOST_09003 [Armillaria ostoyae]
g582	133044	137271	0.29	+		KIY62429.1	78.3	1030	220	1	5	1031	47	1076	0	1642.5	hypothetical protein CYLTODRAFT_426923 [Cylindrobasidium torrendii FP15055 ss-10]
g583	137308	138150	0.29	-		PBL01088.1	63.2	253	80	3	1	240	93	345	7.4e-50	207.2	hypothetical protein ARMGADRAFT_1073398 [Armillaria gallica]
g584	138767	139884	0.82	-		PBK77297.1	82.9	339	48	5	1	334	1	334	6.8e-139	503.4	cytoplasmic protein [Armillaria solidipes]
g585	140175	140936	0.63	-		OBZ79254.1	96	200	8	0	1	200	1	200	3.2e-104	387.5	60S ribosomal protein L16 [Grifola frondosa]
g586	141601	142177	0.63	-		KIY62453.1	82.5	120	20	1	1	119	1	120	1.4e-41	178.7	acyl carrier protein [Cylindrobasidium torrendii FP15055 ss-10]
g587	142444	143408	0.38	+		KIY62454.1	76.6	274	64	0	1	274	1	274	2.3e-116	428.3	mitochondrial ribosomal protein L17 [Cylindrobasidium torrendii FP15055 ss-10]
g588	143584	145263	0.47	+		KIY72728.1	30.8	402	230	14	29	414	75	444	9.3e-24	121.7	hypothetical protein CYLTODRAFT_417727 [Cylindrobasidium torrendii FP15055 ss-10]
g589	145324	147506	0.02	+		KIY72793.1	73.2	373	99	1	1	373	1	372	2e-146	529.3	hypothetical protein CYLTODRAFT_486032 [Cylindrobasidium torrendii FP15055 ss-10]
g590	147512	148343	0.96	-		PBL01060.1	45.7	256	121	4	1	241	1	253	1.7e-59	239.2	hypothetical protein ARMGADRAFT_1073374 [Armillaria gallica]
g591	150561	152851	0.36	+		KIY72789.1	82.9	211	28	3	1	205	1	209	2.1e-94	356.7	hypothetical protein CYLTODRAFT_366949 [Cylindrobasidium torrendii FP15055 ss-10]
g592	153148	154402	0.79	-		KIY72796.1	63.5	373	126	7	1	367	1	369	5.4e-121	444.1	hypothetical protein CYLTODRAFT_449537 [Cylindrobasidium torrendii FP15055 ss-10]
g593	154718	155155	0.99	+		PBK68710.1	89.2	93	10	0	1	93	1	93	3.2e-38	167.2	Sm-like ribonucleo protein [Armillaria solidipes]
g594	156276	158590	0.08	+		PBK77255.1	76.9	520	93	7	61	560	1	513	2.1e-193	685.3	RIO1-domain-containing protein [Armillaria solidipes]
g595	160117	160849	0.46	-		GAW08016.1	73.7	133	32	1	24	153	64	196	5.4e-49	203.8	hypothetical protein LENED_010049 [Lentinula edodes]
g596	161816	163197	0.7	+		SJL05709.1	39.8	327	136	7	29	326	32	326	4.1e-46	195.3	uncharacterized protein ARMOST_09045 [Armillaria ostoyae]
g597	163363	165147	0.95	-		TFK41096.1	63.6	505	158	7	1	490	1	494	2.7e-145	525.4	Eisosome component PIL1-domain-containing protein [Crucibulum laeve]
g598	165722	166804	0.61	-		PBK77260.1	81.7	295	51	3	1	294	1	293	5.6e-129	470.3	translation initiation factor eIF4e [Armillaria solidipes]
g599	167047	168222	0.36	+		PBL01050.1	76.9	338	77	1	5	342	5	341	2.8e-148	534.6	mitochondrial carrier [Armillaria gallica]
g600	168395	172144	0.2	-		KTB42775.1	61.3	1034	312	14	8	1008	8	986	0	1154.8	hypothetical protein WG66_4574 [Moniliophthora roreri]
g601	172277	174081	0.75	+		PBK77265.1	79.7	590	102	5	4	583	6	587	8.8e-243	849.4	SPRY-domain-containing protein [Armillaria solidipes]
g602	174469	174927	0.61	-		SJL05701.1	41.5	135	56	4	1	135	538	649	9e-14	86.7	related to DPS1-aspartyl-tRNA synthetase, cytosolic [Armillaria ostoyae]
g603	175208	177171	0.7	-		ESK87893.1	82.1	541	95	1	1	539	1	541	6e-238	833.2	aspartate-trna ligase [Moniliophthora roreri MCA 2997]
g604	177376	178898	0.72	+		SJL05700.1	88.2	423	49	1	1	422	1	423	1.2e-217	765.4	probable aspartate aminotransferase, mitochondrial precursor [Armillaria ostoyae]
g605	179247	181362	0.42	+		SJL05699.1	37.1	706	302	29	7	602	58	731	6.5e-61	245.4	uncharacterized protein ARMOST_09035 [Armillaria ostoyae]
g606	184202	184645	0.34	+		PBL01067.1	81.3	107	18	1	1	107	1	105	2.3e-43	184.5	Ndufb11, NADH dehydrogenase 1 beta subcomplex subunit [Armillaria gallica]
g607	184776	187284	0.1	-		GAW08010.1	72.8	562	105	3	1	557	52	570	2.6e-228	801.2	translation elongation factor Tu [Lentinula edodes]
g608	187672	195202	0.07	+		OJA21177.1	43.9	1844	873	23	263	1963	6	1831	0	1110.9	hypothetical protein AZE42_04559 [Rhizopogon vesiculosus]
g609	195281	197129	0.24	-		PBL01080.1	63.8	500	140	8	2	496	3	466	8.2e-141	510.4	cation efflux protein [Armillaria gallica]
g610	197278	199849	0.33	+		PPQ64402.1	61.1	663	209	6	1	658	1	619	5e-162	581.3	hypothetical protein CVT26_002109 [Gymnopilus dilepis]
g611	200202	203015	0.49	-		KIY62434.1	64.1	710	222	10	1	708	1	679	2.5e-239	838.2	hypothetical protein CYLTODRAFT_361490 [Cylindrobasidium torrendii FP15055 ss-10]
g612	203244	204548	0.15	+		PFH54548.1	35	406	113	6	4	258	8	413	3.7e-55	224.9	glycoside hydrolase family 5 protein [Amanita thiersii Skay4041]
g613	204820	206868	0.18	+		PBL01076.1	73.2	403	106	1	21	423	27	427	1.2e-185	659.1	glycoside hydrolase [Armillaria gallica]
g614	207449	208162	0.55	-		KIY62457.1	64	175	58	2	1	172	1	173	2.4e-55	224.9	hypothetical protein CYLTODRAFT_426909 [Cylindrobasidium torrendii FP15055 ss-10]
g615	208322	209525	0.43	+		PBL01073.1	62	287	105	3	1	284	1	286	2.3e-93	352.1	hypothetical protein ARMGADRAFT_1160322 [Armillaria gallica]
g616	209970	212010	0.34	-		KNZ71398.1	73	470	107	2	1	452	1	468	5.1e-198	700.3	Protein MEMO1 [Termitomyces sp. J132]
g617	212584	216997	0.17	+		PPQ64378.1	75.8	1065	200	12	71	1122	6	1025	0	1540.4	hypothetical protein CVT26_002085 [Gymnopilus dilepis]
g618	217306	220074	0.18	-		KIY72782.1	74.1	375	76	2	1	371	113	470	9.1e-153	550.4	hypothetical protein CYLTODRAFT_366932 [Cylindrobasidium torrendii FP15055 ss-10]
g619	2	1722	0.19	-		KIY63841.1	79.4	335	66	1	1	332	1	335	4e-147	531.2	AAA-domain-containing protein [Cylindrobasidium torrendii FP15055 ss-10]
g620	1784	3349	0.9	+		KIY63840.1	72.4	239	66	0	3	241	5	243	3.3e-96	362.1	ribosomal protein L1 [Cylindrobasidium torrendii FP15055 ss-10]
g621	3502	5063	0.34	-		PBK77809.1	56.4	454	147	7	7	452	31	441	8.6e-137	496.9	PNK3P-domain-containing protein [Armillaria solidipes]
g622	5254	7728	0.04	+		KIY63842.1	52.5	383	165	4	227	605	11	380	6.8e-105	391.3	PEBP-like protein [Cylindrobasidium torrendii FP15055 ss-10]
g623	10015	15549	0.05	-		RDB23999.1	45.2	1097	542	19	264	1325	1	1073	6.4e-249	870.9	Serine/threonine-protein kinase STY17 [Hypsizygus marmoreus]
g624	15750	16522	1	+		KIY63197.1	74.7	217	54	1	10	225	2	218	2.1e-83	318.5	COQ7-domain-containing protein [Cylindrobasidium torrendii FP15055 ss-10]
g625	16552	16997	1	-		KIY67726.1	53.7	82	35	1	3	81	4	85	5.9e-15	89.7	hypothetical protein CYLTODRAFT_490416 [Cylindrobasidium torrendii FP15055 ss-10]
g626	17079	19810	0.05	+		KIY67725.1	59.3	725	230	18	1	686	1	699	1e-205	726.5	hypothetical protein CYLTODRAFT_375598 [Cylindrobasidium torrendii FP15055 ss-10]
g627	19960	21029	0.39	-		KIY67727.1	66.8	208	53	3	1	193	1	207	1.2e-66	263.1	PEBP-like protein [Cylindrobasidium torrendii FP15055 ss-10]
g628	21244	23389	0.26	-		KIY63845.1	78.6	490	103	2	29	517	1078	1566	2.6e-202	714.9	hypothetical protein CYLTODRAFT_493592 [Cylindrobasidium torrendii FP15055 ss-10]
g629	600	1313	0.21	+
g630	49	963	0.97	+		PBK63611.1	43.6	296	156	3	6	300	506	791	3.8e-56	228.4	hypothetical protein ARMSODRAFT_894015 [Armillaria solidipes]
g631	219	520	0.39	-
g632	21	2194	0.05	-		SJL12351.1	23.9	213	134	4	470	682	151	335	9e-05	58.9	uncharacterized protein ARMOST_15776 [Armillaria ostoyae]
g633	2875	4525	0.04	-		PBK59815.1	43.1	332	161	6	26	348	4	316	7.3e-59	237.7	hypothetical protein ARMSODRAFT_770611 [Armillaria solidipes]
g634	4893	5724	0.54	+		XP_006463384.1	91	133	11	1	57	189	5	136	1.2e-55	226.1	histone 2A [Agaricus bisporus var. bisporus H97]
g635	6885	8971	0.34	+		KIY67080.1	61.7	603	191	8	1	569	1	597	5.4e-205	723.8	alpha/beta-hydrolase [Cylindrobasidium torrendii FP15055 ss-10]
g636	9213	10095	0.28	+		SJL08711.1	29.1	158	88	5	22	161	20	171	0.00065	54.7	uncharacterized protein ARMOST_12080 [Armillaria ostoyae]
g637	11093	12342	0.34	+
g638	12565	17176	0.28	-		KIY62915.1	82.9	898	140	6	12	903	17	906	0	1470.7	protein transporter SEC24 [Cylindrobasidium torrendii FP15055 ss-10]
g639	17279	18172	0.6	+		PBK68916.1	52	150	49	4	55	181	34	183	3.2e-26	128.3	hypothetical protein ARMSODRAFT_1004725 [Armillaria solidipes]
g640	42	1037	0.11	-
g641	315	876	0.15	+
g642	43	557	0.92	+		RDB19555.1	68.3	145	46	0	2	146	329	473	6.1e-55	223.4	hypothetical protein Hypma_013355 [Hypsizygus marmoreus]
g643	433	2095	0.04	+		TFK34761.1	50.9	424	119	13	1	362	1	397	6e-92	347.8	hypothetical protein BDQ12DRAFT_761294 [Crucibulum laeve]
g644	2490	7255	0.02	-		KIJ64585.1	53.4	296	122	6	310	595	1	290	1.2e-77	300.8	hypothetical protein HYDPIDRAFT_111952 [Hydnomerulius pinastri MD-312]
g645	8415	10567	0.54	+
g646	1	860	0.53	+		KIY61104.1	25.5	212	150	5	17	220	555	766	5.6e-13	84.7	hypothetical protein CYLTODRAFT_495401 [Cylindrobasidium torrendii FP15055 ss-10]
g647	891	2023	0.45	+
g648	598	1212	0.51	-		KIY67967.1	55.3	179	72	2	1	173	137	313	7.1e-45	190.3	hypothetical protein CYLTODRAFT_277105 [Cylindrobasidium torrendii FP15055 ss-10]
g649	1	2002	0.21	+		KIY62258.1	58.3	547	228	0	1	547	93	639	4.5e-196	694.1	GMC oxidoreductase [Cylindrobasidium torrendii FP15055 ss-10]
g650	2	1885	0.01	-
g651	2	751	0.52	-		OCH91659.1	66.1	233	68	4	8	234	13	240	3.5e-73	284.6	hypothetical protein OBBRIDRAFT_792010 [Obba rivulosa]
g652	912	1340	0.66	-		XP_007371243.1	87	108	13	1	1	108	1	107	1.5e-42	181.8	hsp10-like protein [Dichomitus squalens LYAD-421 SS1]
g653	1	982	0.61	+		KII82811.1	48.8	295	143	2	3	297	36	322	1.9e-55	226.1	hypothetical protein PLICRDRAFT_181010 [Plicaturopsis crispa FD-325 SS-3]
g654	1	620	0.71	+		SJL09454.1	34	191	87	5	12	163	174	364	9.3e-14	87	uncharacterized protein ARMOST_12832 [Armillaria ostoyae]
g655	1	668	0.65	+
g656	169	2930	0.77	+		SJK99940.1	54	939	375	10	3	886	1107	2043	2.3e-282	981.5	uncharacterized protein ARMOST_03251 [Armillaria ostoyae]
g657	2	1256	0.07	-
g658	2	403	0.33	-		KIK53166.1	42	88	51	0	30	117	91	178	6.5e-12	80.1	hypothetical protein GYMLUDRAFT_1026911 [Gymnopus luxurians FD-317 M1]
g659	689	3136	0.14	-		SJL04657.1	70.3	434	109	6	289	717	346	764	5e-163	584.7	uncharacterized protein ARMOST_08025 [Armillaria ostoyae]
g660	3370	4096	0.52	+		SJL04624.1	47.5	183	68	6	1	177	18	178	5.2e-28	134.4	uncharacterized protein ARMOST_07992 [Armillaria ostoyae]
g661	4387	5712	0.9	-		KIY69317.1	64	297	103	2	7	303	3	295	5.3e-106	394	RTA1 like protein [Cylindrobasidium torrendii FP15055 ss-10]
g662	7175	7966	0.98	+		KIY46410.1	48.9	264	133	2	1	263	1	263	1e-65	260	kinase-like protein [Fistulina hepatica ATCC 64428]
g663	8093	9297	0.97	-		KIY66361.1	71.1	287	81	2	1	286	1	286	2.1e-108	402.1	hypothetical protein CYLTODRAFT_463573 [Cylindrobasidium torrendii FP15055 ss-10]
g664	9751	10404	0.97	-		KIY61169.1	66.3	184	57	2	1	180	1	183	2.4e-53	218.4	hypothetical protein CYLTODRAFT_427659 [Cylindrobasidium torrendii FP15055 ss-10]
g665	10480	12179	0.41	+		KIY61170.1	60.3	458	172	6	11	463	4	456	3.2e-155	558.1	acid protease [Cylindrobasidium torrendii FP15055 ss-10]
g666	13155	14376	0.81	+		KIY61171.1	71	334	96	1	4	336	23	356	4.5e-151	543.9	hypothetical protein CYLTODRAFT_384793 [Cylindrobasidium torrendii FP15055 ss-10]
g667	14674	17980	0.13	-		AYG88103.1	97.1	718	10	1	61	778	62	768	0	1387.5	exo-beta-1,3-glucanase, partial [Flammulina velutipes]
g668	23995	30596	0.66	+		PBK64451.1	75.3	1970	431	18	1	1933	1	1951	0	2829.3	SNF2 chromatin remodeling protein [Armillaria solidipes]
g669	35449	36943	0.2	+		KIY63756.1	64.5	380	135	0	17	396	19	398	1e-141	513.1	glycoside hydrolase family 88 protein, partial [Cylindrobasidium torrendii FP15055 ss-10]
g670	37090	39402	0.31	-		KIY45944.1	43.7	531	252	10	13	502	16	540	4.9e-125	458	hypothetical protein FISHEDRAFT_76178 [Fistulina hepatica ATCC 64428]
g671	40212	41563	0.31	+		XP_009548181.1	36	239	104	1	29	218	3	241	1.1e-36	163.3	hypothetical protein HETIRDRAFT_440726 [Heterobasidion irregulare TC 32-1]
g672	85	2298	0.48	+		RDB18820.1	58.1	565	235	2	158	722	328	890	1.7e-190	676	Integrase/recombinase xerD [Hypsizygus marmoreus]
g673	1	750	0.64	+		PAV19090.1	79.9	224	45	0	17	240	286	509	3.6e-102	380.9	hypothetical protein PNOK_0593400 [Pyrrhoderma noxium]
g674	770	1226	0.63	-		KTB33323.1	40.9	88	51	1	8	95	434	520	1.2e-06	62.4	hypothetical protein WG66_14103 [Moniliophthora roreri]
g675	139	1663	0.8	+		RDB16619.1	71.6	476	116	9	1	461	1	472	6.6e-169	603.6	Phospholipid-transporting ATPase DNF1 [Hypsizygus marmoreus]
g676	1	1446	0.83	-		GAW09795.1	37.9	219	121	8	193	406	74	282	7.3e-26	128.3	hypothetical protein LENED_011988 [Lentinula edodes]
g677	208	2318	0.16	-		F7J1C8.1	89.7	263	7	3	1	262	1	244	4.1e-119	438.3	RecName: Full=Galactan endo-beta-1,3-galactanase; AltName: Full=Endo-beta-1,3-galactanase; Short=FvEN3GAL; Flags: Precursor
g678	2769	4791	0.41	+		PBK70911.1	78.4	463	80	3	27	487	1	445	3e-212	747.7	phosphoglycerate mutase-like protein [Armillaria solidipes]
g679	5311	6676	0.25	+		PBK70910.1	64.4	393	139	1	6	397	6	398	2.9e-152	548.1	kinase-like protein [Armillaria solidipes]
g680	6712	9482	0.22	-		PBK94643.1	71.1	343	99	0	1	343	1	343	2.2e-148	535.8	oxidoreductase [Armillaria gallica]
g681	10082	11605	0.05	+		KIY65741.1	62.8	382	127	2	2	368	4	385	7.2e-126	460.3	MFS general substrate transporter [Cylindrobasidium torrendii FP15055 ss-10]
g682	2	1071	0.08	-		RXW21512.1	25.2	226	150	6	21	235	11	228	0.001	53.9	hypothetical protein EST38_g4321 [Psathyrella aberdarensis]
g683	2015	3790	0.74	-		PBK86426.1	78.1	565	113	5	1	556	1	563	1.9e-263	917.9	hypothetical protein ARMGADRAFT_972949 [Armillaria gallica]
g684	3865	6793	0.15	+		KIY69273.1	88.5	496	54	2	15	509	1	494	1e-268	936	glycosyltransferase family 69 protein [Cylindrobasidium torrendii FP15055 ss-10]
g685	6924	8497	0.19	-		KIY70758.1	48.3	487	222	8	7	486	7	470	2.5e-118	435.6	hypothetical protein CYLTODRAFT_487781 [Cylindrobasidium torrendii FP15055 ss-10]
g686	8989	10152	0.31	+		KIM44979.1	41.8	316	159	8	25	327	18	321	5.6e-61	244.6	hypothetical protein M413DRAFT_25370 [Hebeloma cylindrosporum h7]
g687	10675	14435	0.21	-		PBK92535.1	72.6	460	115	6	1	455	1	454	4.3e-178	635.2	Thioesterase/thiol ester dehydrase-isomerase [Armillaria gallica]
g688	14657	15921	0.79	+		ESK90079.1	60.2	339	125	2	43	372	56	393	3e-111	411.8	hypothetical protein Moror_7857 [Moniliophthora roreri MCA 2997]
g689	16866	20698	0.03	+		B8XC03.1	59.9	247	99	0	1	247	1	247	2.7e-69	273.5	RecName: Full=Ice-binding protein; AltName: Full=Antifreeze protein; Short=AFP; Flags: Precursor
g690	20782	22670	0.54	-		KIY71848.1	71.4	468	130	1	18	485	5	468	7.4e-203	716.5	amine oxidase [Cylindrobasidium torrendii FP15055 ss-10]
g691	22968	23993	0.44	+		KIM35352.1	47.4	302	127	6	1	290	1	282	1.1e-71	280	hypothetical protein M413DRAFT_449809 [Hebeloma cylindrosporum h7]
g692	241	2557	0.04	+
g693	2	825	0.35	-
g694	1119	3828	0.79	+
g695	3860	7136	0.39	-		KIY67230.1	65.8	985	312	8	1	977	1	968	0	1297.7	P-loop containing nucleoside triphosphate hydrolase protein [Cylindrobasidium torrendii FP15055 ss-10]
g696	7262	8847	0.34	-		KIY67224.1	80.4	444	87	0	1	444	1	444	5.2e-211	743.4	hypothetical protein CYLTODRAFT_490791 [Cylindrobasidium torrendii FP15055 ss-10]
g697	10876	12917	0.96	+		KIY62498.1	73.3	469	125	0	1	469	1	469	8.7e-209	736.1	hypothetical protein CYLTODRAFT_383512 [Cylindrobasidium torrendii FP15055 ss-10]
g698	13008	15534	0.2	-		KDQ32954.1	70.3	239	65	2	40	273	71	308	6.6e-79	305.1	hypothetical protein PLEOSDRAFT_1073316 [Pleurotus ostreatus PC15]
g699	15759	17147	0.83	+		PBK84726.1	69.9	435	108	4	1	429	1	418	1.4e-165	592.4	mannos-6-phosphate isomerase [Armillaria gallica]
g700	17920	20957	0.35	+		PBK66242.1	59.5	647	234	9	6	638	18	650	1.2e-197	699.5	P-loop containing nucleoside triphosphate hydrolase protein [Armillaria solidipes]
g701	21148	22210	0.17	-
g702	1	510	0.52	+		XP_007871323.1	41.5	164	96	0	5	168	308	471	2.1e-27	132.1	hypothetical protein GLOTRDRAFT_24483, partial [Gloeophyllum trabeum ATCC 11539]
g703	127	701	1	-		SJK99228.1	56.9	181	78	0	6	186	804	984	6.5e-54	220.3	uncharacterized protein ARMOST_02519 [Armillaria ostoyae]
g704	215	4183	0.64	-		RXW18423.1	32.1	1158	662	19	18	1146	2	1064	4.2e-157	565.8	hypothetical protein EST38_g7441 [Psathyrella aberdarensis]
g705	188	701	0.63	+
g706	98	1263	0.77	+
g707	1378	2264	0.61	+		KIJ19531.1	35.3	119	74	2	7	122	157	275	6.1e-09	71.2	hypothetical protein PAXINDRAFT_153425 [Paxillus involutus ATCC 200175]
g708	2299	3373	0.82	-		PPQ96959.1	49.7	320	160	1	1	319	1	320	2.5e-82	315.5	hypothetical protein CVT26_005981 [Gymnopilus dilepis]
g709	788	2170	0.47	-		PBL02132.1	39.1	432	205	6	7	390	72	493	5.8e-73	284.6	hypothetical protein ARMGADRAFT_980581 [Armillaria gallica]
g710	305	1687	0.08	+
g711	500	3414	0.34	-		SJK98632.1	83.3	466	75	2	373	835	41	506	2.7e-205	725.3	related to Probable 26S proteasome regulatory subunit rpn3 [Armillaria ostoyae]
g712	3506	6317	0.65	+		KIY72637.1	60.6	728	235	13	43	733	130	842	6.3e-205	724.2	hypothetical protein CYLTODRAFT_367405 [Cylindrobasidium torrendii FP15055 ss-10]
g713	6588	7224	0.6	-		OAQ29897.1	34	97	49	4	40	136	21	102	2.4e-05	58.5	hypothetical protein K457DRAFT_137466 [Mortierella elongata AG-77]
g714	8012	8906	0.52	+		RDB24638.1	50.4	244	121	0	3	246	2	245	3.3e-58	235	putative kinetochore protein SPC25 [Hypsizygus marmoreus]
g715	9314	10018	0.47	-
g716	10503	12897	0.77	-		PBK89015.1	45.2	857	340	34	1	763	1	821	4.3e-80	309.3	hypothetical protein ARMGADRAFT_1167792 [Armillaria gallica]
g717	13227	13830	0.98	+		KIY61678.1	96.3	162	6	0	1	162	1	162	5e-87	330.1	ubiquitin-conjugating enzyme [Cylindrobasidium torrendii FP15055 ss-10]
g718	13931	18239	0.13	-		KIY66430.1	57.9	810	287	12	1	781	1	785	1.4e-272	949.1	hypothetical protein CYLTODRAFT_423460 [Cylindrobasidium torrendii FP15055 ss-10]
g719	20422	21665	0.65	+		KIY65369.1	76.7	361	52	2	1	361	1	329	3.4e-144	521.2	Mo25-like protein [Cylindrobasidium torrendii FP15055 ss-10]
g720	22059	22831	0.98	-		XP_007323358.1	85.2	149	22	0	1	149	1	149	1.1e-37	166	hypothetical protein SERLADRAFT_401260 [Serpula lacrymans var. lacrymans S7.9]
g721	23032	24452	0.36	+		PBK73282.1	92.1	355	27	1	1	355	1	354	4.3e-184	653.7	heterotrimeric G-protein alpha subunit, GPA1-like protein [Armillaria solidipes]
g722	25698	27342	0.37	+		KIY64068.1	76.8	409	92	2	1	407	1	408	5.5e-151	543.9	carbohydrate-binding module family 13 protein [Cylindrobasidium torrendii FP15055 ss-10]
g723	27739	28699	0.53	-		AVL25507.1	99.3	267	2	0	1	267	1	267	4.6e-154	553.5	succinate dehydrogenase iron-sulfur subunit [Flammulina velutipes]
g724	29479	31621	0.51	+		PBK62818.1	35.5	186	77	9	358	525	197	357	1.8e-10	77.8	hypothetical protein ARMSODRAFT_1024579 [Armillaria solidipes]
g725	32493	34532	0.89	+		PBK95806.1	79.4	562	112	2	1	558	1	562	3.3e-239	837.4	MFS general substrate transporter [Armillaria gallica]
g726	2	398	0.7	-
g727	1	805	0.26	+
g728	1	1449	0.11	+		PBL00362.1	63.7	226	39	4	1	185	75	298	9.3e-64	253.8	CBF-domain-containing protein, partial [Armillaria gallica]
g729	603	1142	0.34	+
g730	2	977	0.11	-
g731	1	218	0.53	-
g732	415	1277	0.3	+
g733	1975	2386	0.64	+
g734	3930	5330	0.18	+		XP_006463106.1	45.5	358	174	4	24	360	6	363	6.4e-85	324.3	hypothetical protein AGABI2DRAFT_119934 [Agaricus bisporus var. bisporus H97]
g735	6227	7810	0.17	-		PIL33833.1	26.4	458	218	16	2	458	10	349	1.9e-27	133.7	hypothetical protein GSI_03539 [Ganoderma sinense ZZ0214-1]
g736	2	594	0.71	-
g737	2605	4903	0.14	-		KIY70849.1	78.8	528	109	3	1	526	1	527	2.7e-235	824.3	polysaccharide lyase family 4 protein [Cylindrobasidium torrendii FP15055 ss-10]
g738	6274	8070	0.14	+		SJL12843.1	44.4	351	171	7	155	488	70	413	7.8e-67	264.6	uncharacterized protein ARMOST_16275 [Armillaria ostoyae]
g739	8225	8851	0.12	-		KIY70861.1	84.1	138	22	0	7	144	7	144	1.2e-60	242.3	hypothetical protein CYLTODRAFT_419399 [Cylindrobasidium torrendii FP15055 ss-10]
g740	9258	9719	0.12	-		PBK70962.1	86.1	101	12	1	1	101	1	99	2.9e-40	174.1	hypothetical protein ARMSODRAFT_955695 [Armillaria solidipes]
g741	9869	11503	0.46	+		KIY70854.1	72	357	97	1	10	363	13	369	2.8e-157	564.7	glycoside hydrolase family 16 protein [Cylindrobasidium torrendii FP15055 ss-10]
g742	11684	12707	0.54	-		PBK70967.1	86.3	277	34	2	1	277	1	273	1.5e-131	478.8	20S proteasome subunit [Armillaria solidipes]
g743	12822	14888	0.23	+		PBK94713.1	79.2	490	85	1	1	490	1	473	1.4e-222	781.9	succinate semialdehyde dehydrogenase [Armillaria gallica]
g744	15234	20042	0.29	+		SJL12855.1	54.5	1296	502	19	1	1247	1	1257	0	1115.5	uncharacterized protein ARMOST_16287 [Armillaria ostoyae]
g745	20562	22128	0.29	-		KIY69335.1	72.3	444	119	2	13	453	12	454	1.7e-201	711.8	hypothetical protein CYLTODRAFT_442758 [Cylindrobasidium torrendii FP15055 ss-10]
g746	23667	24384	0.44	-		PBK61440.1	36.4	165	88	5	43	206	72	220	1.3e-18	103.2	hypothetical protein ARMSODRAFT_1008801 [Armillaria solidipes]
g747	24763	25200	0.41	-		KIY70057.1	41.9	86	41	4	5	88	40	118	0.00047	54.3	hypothetical protein CYLTODRAFT_452081 [Cylindrobasidium torrendii FP15055 ss-10]
g748	25250	26449	0.47	-		KIY70872.1	71.5	298	78	2	1	291	1	298	8.2e-113	416.8	mitochondrial carrier [Cylindrobasidium torrendii FP15055 ss-10]
g749	26558	28328	0.07	+		KIY70871.1	78.1	228	45	3	7	229	9	236	5e-89	338.2	ribosome recycling factor [Cylindrobasidium torrendii FP15055 ss-10]
g750	28786	30563	0.41	+		XP_007865129.1	67.4	546	173	4	1	542	1	545	1.1e-202	716.1	hypothetical protein GLOTRDRAFT_75030 [Gloeophyllum trabeum ATCC 11539]
g751	32431	34512	0.08	+		KIY70873.1	68.8	471	134	5	1	467	1	462	1.1e-179	639.4	putative G protein alpha chain [Cylindrobasidium torrendii FP15055 ss-10]
g752	34831	39785	0.07	-		KIY70869.1	35.9	964	421	33	427	1369	1	788	2.2e-61	248.1	hypothetical protein CYLTODRAFT_487754 [Cylindrobasidium torrendii FP15055 ss-10]
g753	40934	42196	0.84	-		PBK66703.1	21.8	363	257	8	33	385	67	412	3.6e-12	82.8	hypothetical protein ARMSODRAFT_1005826 [Armillaria solidipes]
g754	42566	44430	0.32	+		SJL12841.1	50.3	578	237	12	1	557	1	549	1.8e-139	506.1	uncharacterized protein ARMOST_16273 [Armillaria ostoyae]
g755	44679	45804	0.72	+		PBK94690.1	54.1	209	96	0	16	224	6	214	2.4e-63	251.9	thioredoxin-like protein [Armillaria gallica]
g756	46066	48272	0.14	-		KIY70868.1	41	473	230	8	63	493	2	467	1.6e-75	293.5	hypothetical protein CYLTODRAFT_441713 [Cylindrobasidium torrendii FP15055 ss-10]
g757	48397	49341	0.41	+		PBK94690.1	58.3	204	83	1	1	204	1	202	8.8e-65	256.5	thioredoxin-like protein [Armillaria gallica]
g758	50181	51539	0.38	-		SJL12864.1	52.4	450	179	11	1	433	1	432	7.5e-106	394	uncharacterized protein ARMOST_16296 [Armillaria ostoyae]
g759	52812	54941	0.21	+		PBK70950.1	92.5	429	32	0	94	522	1	429	1.9e-233	818.1	putative adenosylhomocysteinase [Armillaria solidipes]
g760	57378	58925	0.94	+		KIY71476.1	74.4	461	115	2	4	462	11	470	2.3e-217	764.6	delta 9-fatty acid desaturase protein [Cylindrobasidium torrendii FP15055 ss-10]
g761	59863	60607	0.61	+
g762	60887	63841	0.75	-		KIY64352.1	56.1	619	258	8	1	611	1	613	6.1e-194	687.2	GMC oxidoreductase [Cylindrobasidium torrendii FP15055 ss-10]
g763	65493	65940	0.76	-
g764	66946	68599	0.55	+		KIY70874.1	48.6	424	141	8	2	397	8	382	6.3e-99	370.9	Pkinase-domain-containing protein [Cylindrobasidium torrendii FP15055 ss-10]
g765	68715	70249	0.34	-		PBK74855.1	72.6	398	87	3	1	382	1	392	2.7e-123	451.8	nucleic acid-binding protein [Armillaria solidipes]
g766	71541	72583	0.99	-		KIY70877.1	75.7	107	24	2	4	110	8	112	2.2e-33	152.9	hypothetical protein CYLTODRAFT_165938 [Cylindrobasidium torrendii FP15055 ss-10]
g767	72731	73067	0.82	+		SJL12822.1	69.6	79	20	2	1	76	1	78	1.6e-16	94.7	uncharacterized protein ARMOST_16253 [Armillaria ostoyae]
g768	75819	77011	0.94	+		KIY63975.1	59.9	382	149	2	1	380	1	380	7e-124	453.8	hypothetical protein CYLTODRAFT_493511 [Cylindrobasidium torrendii FP15055 ss-10]
g769	77728	78812	0.31	+		KIY63976.1	88.7	151	16	1	163	312	1	151	1.4e-66	263.1	TAFII28-domain-containing protein [Cylindrobasidium torrendii FP15055 ss-10]
g770	80413	81810	0.52	-		PBK65147.1	46.6	429	157	13	4	398	2	392	7.8e-55	224.6	hypothetical protein ARMSODRAFT_961421 [Armillaria solidipes]
g771	85172	86036	0.42	+		TFK70864.1	65.6	163	50	2	21	179	25	185	3.5e-57	231.1	hypothetical protein BDN72DRAFT_838395 [Pluteus cervinus]
g772	86582	90596	0.77	-		PBK94765.1	89.4	1163	119	2	1	1162	1	1160	0	2072.7	ATP-citrate synthase [Armillaria gallica]
g773	92239	93023	1	-		KIO23466.1	42.9	84	44	1	11	90	21	104	3.4e-07	65.5	hypothetical protein M407DRAFT_45884, partial [Tulasnella calospora MUT 4182]
g774	93943	94701	0.72	-		XP_002911955.1	36.2	94	53	1	8	94	81	174	4.3e-07	65.1	hypothetical protein CC1G_13994 [Coprinopsis cinerea okayama7#130]
g775	95646	96622	0.76	-		AER36156.1	82.4	296	49	3	1	293	1	296	1.4e-143	518.8	delta7-sterol-C-5-desaturase [Flammulina velutipes]
g776	96912	98684	0.36	-		PBL01714.1	77.7	264	50	4	95	350	95	357	2.7e-106	395.6	RNA-binding domain-containing protein [Armillaria gallica]
g777	99174	100433	0.93	+		KIY66224.1	51.6	438	145	15	1	419	1	390	1.8e-59	240	hypothetical protein CYLTODRAFT_455566 [Cylindrobasidium torrendii FP15055 ss-10]
g778	101487	103146	0.76	+		KIY69073.1	53.6	528	195	17	1	510	1	496	1.2e-115	426.8	hypothetical protein CYLTODRAFT_489291 [Cylindrobasidium torrendii FP15055 ss-10]
g779	104701	105233	0.29	-
g780	2	288	0.6	-
g781	403	817	0.27	+
g782	1	2095	0.53	+		CDO75561.1	49.2	545	267	5	68	606	5	545	4.7e-138	501.5	hypothetical protein BN946_scf184858.g1 [Trametes cinnabarina]
g783	237	1018	0.03	-		KIY64051.1	39.3	168	80	3	11	156	141	308	3.1e-16	95.1	FMN-linked oxidoreductase [Cylindrobasidium torrendii FP15055 ss-10]
g784	1246	1914	0.03	-
g785	2	790	0.23	-
g786	58	1525	0.08	+
g787	686	1044	0.37	+		KIY72552.1	79.5	73	12	1	2	74	3	72	1.3e-19	105.5	hypothetical protein CYLTODRAFT_417753 [Cylindrobasidium torrendii FP15055 ss-10]
g788	2523	3052	0.45	-
g789	8063	8515	0.77	-		PBK71230.1	80.2	106	21	0	2	107	3	108	1.4e-40	175.3	APG12-domain-containing protein [Armillaria solidipes]
g790	8968	9780	0.57	-		XP_008040989.1	88.4	43	5	0	211	253	231	273	2.2e-12	82.8	hypothetical protein TRAVEDRAFT_30612 [Trametes versicolor FP-101664 SS1]
g791	10653	11133	0.53	-
g792	12410	15960	0.17	+		GAV99107.1	21.7	1023	626	39	5	939	3	938	2.9e-15	94.4	hypothetical protein LENED_000540 [Lentinula edodes]
g793	16652	17330	0.21	-		KIY61681.1	45.2	186	71	4	1	155	1	186	2.8e-34	154.8	hypothetical protein CYLTODRAFT_362538 [Cylindrobasidium torrendii FP15055 ss-10]
g794	316	612	0.9	-
g795	190	573	0.79	-
g796	1118	3809	0.63	+		PBK91420.1	83.6	681	111	1	1	680	1	681	0	1194.9	glutamate-cysteine ligase catalytic subunit [Armillaria gallica]
g797	3938	4589	0.98	+		KIY74337.1	86.2	145	20	0	19	163	3	147	2.1e-61	245	epsilon subunit of F1F0-ATP synthase N-terminal domain-containing protein [Cylindrobasidium torrendii FP15055 ss-10]
g798	4646	7231	0.38	-		SJK97451.1	40.4	790	397	22	7	745	1	767	4.4e-122	448.7	uncharacterized protein ARMOST_00703 [Armillaria ostoyae]
g799	7823	8757	0.26	+
g800	8989	10300	0.5	-		PBK79545.1	25.6	359	201	11	7	360	12	309	1.1e-12	84.3	hypothetical protein ARMGADRAFT_1172331 [Armillaria gallica]
g801	651	1252	0.22	-
g802	992	1771	0.26	+		KTB37278.1	44.8	230	114	6	33	257	7	228	5.2e-46	194.5	hypothetical protein WG66_10149, partial [Moniliophthora roreri]
g803	1	2332	0.69	+		RDB20168.1	24.9	530	308	14	123	634	133	590	3.4e-25	126.7	hypothetical protein Hypma_012721 [Hypsizygus marmoreus]
g804	413	3592	0.01	-		PBK73997.1	73.4	470	101	3	1	461	35	489	5.2e-205	724.2	alpha/beta-hydrolase [Armillaria solidipes]
g805	3738	4524	0.55	+		KIL68741.1	90.9	187	17	0	1	187	1	187	7.7e-63	250	hypothetical protein M378DRAFT_157848 [Amanita muscaria Koide BX008]
g806	4750	7614	0.45	-		PBL03289.1	61.6	831	293	11	1	819	9	825	4.9e-215	757.7	P-loop containing nucleoside triphosphate hydrolase protein [Armillaria gallica]
g807	7870	14361	0.24	-		PBK92884.1	61.2	2122	736	31	5	2041	8	2127	0	2477.6	putative polyketide synthase [Armillaria gallica]
g808	16449	18883	0.82	-		PBK74083.1	91.2	651	57	0	1	651	1	651	0	1148.3	heat shock protein 70 [Armillaria solidipes]
g809	19155	28787	0.01	-		PBK74084.1	63.4	1261	423	14	1	1238	1	1246	0	1582.8	hypothetical protein ARMSODRAFT_951651 [Armillaria solidipes]
g810	28912	33302	0.19	-		PBK67267.1	54.6	401	167	6	226	617	5	399	1.2e-104	391.3	hypothetical protein ARMSODRAFT_915615 [Armillaria solidipes]
g811	33968	39212	0.07	+		PBK74087.1	59.4	579	189	13	970	1539	1	542	1.4e-154	557.8	hypothetical protein ARMSODRAFT_929640 [Armillaria solidipes]
g812	39559	40845	0.9	+		TFK40279.1	44.9	437	202	12	2	428	14	421	2.4e-80	309.3	hypothetical protein BDQ12DRAFT_628147 [Crucibulum laeve]
g813	41291	42434	0.37	+		PBK60609.1	62.7	343	94	7	7	328	1	330	6.9e-104	387.1	mitochondrial carrier, partial [Armillaria solidipes]
g814	42659	44754	0.1	-		GAT57389.1	32.9	562	338	10	8	538	17	570	1.2e-63	254.2	predicted protein [Mycena chlorophos]
g815	45657	48559	0.2	-		KIY65318.1	79.8	647	108	4	81	721	42	671	1.3e-275	958.7	hypothetical protein CYLTODRAFT_379636 [Cylindrobasidium torrendii FP15055 ss-10]
g816	48663	50381	0.62	+		KIY65317.1	46.3	564	275	7	1	539	43	603	5.1e-128	468	hypothetical protein CYLTODRAFT_400625 [Cylindrobasidium torrendii FP15055 ss-10]
g817	50654	51740	0.51	-		PBK82773.1	40.4	225	133	1	14	238	20	243	6.5e-35	157.5	hypothetical protein ARMGADRAFT_1170748 [Armillaria gallica]
g818	52059	53820	0.45	+		SJK97949.1	54.2	552	225	10	1	534	1	542	1.6e-134	489.6	uncharacterized protein ARMOST_01205 [Armillaria ostoyae]
g819	54318	56038	0.5	+		KIY65321.1	53.4	616	189	16	1	540	1	594	5.9e-100	374.8	hypothetical protein CYLTODRAFT_456430 [Cylindrobasidium torrendii FP15055 ss-10]
g820	57039	58627	0.58	+		KIY65319.1	66.9	450	124	5	1	448	1	427	4.9e-177	630.6	hypothetical protein CYLTODRAFT_424459 [Cylindrobasidium torrendii FP15055 ss-10]
g821	1583	3524	0.56	-		PBK79914.1	82.9	556	83	3	1	555	1	545	1.3e-264	921.8	NMD3-domain-containing protein [Armillaria gallica]
g822	3834	13334	0.01	+		PBK67418.1	65.4	1542	473	17	13	1498	16	1553	0	2002.6	hypothetical protein ARMSODRAFT_958990 [Armillaria solidipes]
g823	13991	14706	0.89	-		KIY74246.1	29.9	231	140	6	3	221	7	227	1.9e-17	99.4	hypothetical protein CYLTODRAFT_484576 [Cylindrobasidium torrendii FP15055 ss-10]
g824	15624	17267	0.14	-		KIY74246.1	48.1	54	28	0	101	154	120	173	5.8e-05	58.5	hypothetical protein CYLTODRAFT_484576 [Cylindrobasidium torrendii FP15055 ss-10]
g825	17453	19475	0.48	+		KIJ19531.1	29.4	272	173	9	220	485	24	282	6.5e-15	92.4	hypothetical protein PAXINDRAFT_153425 [Paxillus involutus ATCC 200175]
g826	19505	20572	0.9	-		PPR06839.1	46.4	321	168	3	1	319	1	319	4.1e-77	298.1	hypothetical protein CVT26_003829 [Gymnopilus dilepis]
g827	21045	21730	0.95	-		KIY74246.1	32	194	127	3	17	210	39	227	9.2e-17	97.1	hypothetical protein CYLTODRAFT_484576 [Cylindrobasidium torrendii FP15055 ss-10]
g828	26	711	0.61	-
g829	1781	4186	0.21	+		KIJ92328.1	38	458	204	9	11	415	121	551	7.9e-76	294.7	hypothetical protein K443DRAFT_13697 [Laccaria amethystina LaAM-08-1]
g830	259	1606	0.01	-
g831	1	2014	0.01	+		KIY62358.1	40.3	484	231	11	1	438	59	530	2.8e-84	322.4	cytochrome P450 [Cylindrobasidium torrendii FP15055 ss-10]
g832	2278	4466	0.47	-		KIY74365.1	67.6	661	185	17	1	646	23	669	4.4e-227	797.3	hypothetical protein CYLTODRAFT_416207 [Cylindrobasidium torrendii FP15055 ss-10]
g833	4792	6564	0.43	+		SJL10134.1	42.4	422	229	6	4	412	23	443	1.1e-74	290.8	uncharacterized protein ARMOST_13518 [Armillaria ostoyae]
g834	6967	7758	0.14	-		PBK73772.1	41.1	158	75	2	11	167	7	147	1.3e-20	109.8	hypothetical protein ARMSODRAFT_952846 [Armillaria solidipes]
g835	7958	10065	0.37	+		KIY74252.1	34.4	418	240	8	247	650	129	526	5.5e-28	136	hypothetical protein CYLTODRAFT_448016 [Cylindrobasidium torrendii FP15055 ss-10]
g836	10349	11125	0.85	+		KII88326.1	45.4	207	88	6	72	256	114	317	1.2e-31	146.7	hypothetical protein PLICRDRAFT_54171 [Plicaturopsis crispa FD-325 SS-3]
g837	11204	12497	0.25	-		KIY65925.1	78.4	301	63	1	28	326	15	315	1.1e-133	486.1	mitochondrial carrier [Cylindrobasidium torrendii FP15055 ss-10]
g838	12840	13576	0.55	+		KIY64096.1	73.2	213	54	1	1	213	68	277	5.2e-84	320.5	Isy1-like splicing factor [Cylindrobasidium torrendii FP15055 ss-10]
g839	13668	17819	0.37	-		SJL09619.1	84.8	811	123	0	286	1096	1	811	0	1408.3	probable 6-phosphofructokinase [Armillaria ostoyae]
g840	18165	18734	0.59	-		PBK73827.1	88.4	138	16	0	1	138	1	138	1.7e-67	265	UBC-like protein [Armillaria solidipes]
g841	18932	21730	0.4	+		KIY64100.1	69.4	638	131	7	1	634	1	578	1.6e-184	656.4	hypothetical protein CYLTODRAFT_381376 [Cylindrobasidium torrendii FP15055 ss-10]
g842	21882	24219	0.36	+		RDB29982.1	93.2	601	41	0	1	601	1	601	0	1128.6	ABC transporter E family member 2 [Hypsizygus marmoreus]
g843	24415	29543	0.05	-		PBK76201.1	73.9	568	118	3	855	1392	2	569	8e-226	794.3	histidyl-tRNA synthetase [Armillaria solidipes]
g844	29960	31272	0.88	+		GAW00713.1	90.8	370	34	0	1	370	1	370	3.1e-185	657.5	60s ribosomal protein l2 [Lentinula edodes]
g845	31546	34819	0.29	+		KIY66207.1	81.7	497	81	5	1	489	1	495	2.8e-222	781.9	nucleotide-diphospho-sugar transferase [Cylindrobasidium torrendii FP15055 ss-10]
g846	35661	36184	0.54	-		KDQ60226.1	63.5	148	43	5	3	142	2	146	7.3e-35	156.8	hypothetical protein JAAARDRAFT_174251 [Jaapia argillacea MUCL 33604]
g847	36405	39738	0.02	-		KIY66204.1	84.9	654	81	3	228	864	1	653	0	1107.8	Ca2+-binding actin-bundling protein [Cylindrobasidium torrendii FP15055 ss-10]
g848	40040	41955	0.44	+		PBK67874.1	75	519	107	9	2	511	3	507	2.1e-214	755	DUF1692-domain-containing protein [Armillaria solidipes]
g849	42144	43407	0.37	+		KIY66200.1	72.1	337	90	3	64	396	48	384	3.7e-139	504.6	mitochondrial matrix Mmp37 [Cylindrobasidium torrendii FP15055 ss-10]
g850	43482	45448	0.7	-		GAT53371.1	24.7	599	387	23	47	613	12	578	1.3e-21	114.8	predicted protein [Mycena chlorophos]
g851	45506	48094	0.42	+		PBK95688.1	61.6	795	240	10	1	779	1	746	5e-201	711.1	hypothetical protein ARMGADRAFT_812349 [Armillaria gallica]
g852	48933	50310	0.71	+		KIY69569.1	63.4	314	111	4	1	313	1	311	6e-105	390.6	hypothetical protein CYLTODRAFT_420637 [Cylindrobasidium torrendii FP15055 ss-10]
g853	50569	54746	0.79	+		KIY66197.1	64.6	1223	376	7	1	1189	1	1200	2.1e-299	1038.5	hypothetical protein CYLTODRAFT_491663 [Cylindrobasidium torrendii FP15055 ss-10]
g854	54889	56501	0.64	+		KIY63347.1	61.4	391	116	7	46	410	27	408	5.6e-130	474.2	HAD-like protein, partial [Cylindrobasidium torrendii FP15055 ss-10]
g855	56578	58655	0.26	-		SJL13979.1	39.5	618	301	12	2	565	30	628	7.5e-125	457.6	uncharacterized protein ARMOST_17431 [Armillaria ostoyae]
g856	58832	61666	0.51	-		KIY63344.1	68.9	879	224	19	5	859	12	865	7e-297	1029.6	ATP-NAD kinase [Cylindrobasidium torrendii FP15055 ss-10]
g857	61823	63182	0.75	-		KIY63346.1	66.3	401	127	6	2	398	3	399	4.1e-143	517.7	hypothetical protein CYLTODRAFT_493971 [Cylindrobasidium torrendii FP15055 ss-10]
g858	63617	64154	0.63	+		PBK73717.1	89.1	101	11	0	6	106	2	102	5.4e-45	189.9	UPF0041-domain-containing protein [Armillaria solidipes]
g859	64250	64903	0.99	-		PBK73718.1	46.3	218	109	4	1	217	8	218	1.5e-46	196.1	hypothetical protein ARMSODRAFT_952822 [Armillaria solidipes]
g860	65161	65826	0.32	+		RDB25326.1	42.1	171	66	9	1	159	1	150	8.8e-18	100.1	hypothetical protein Hypma_008053 [Hypsizygus marmoreus]
g861	66743	69316	0.45	+		PBK73720.1	79.4	632	122	3	28	658	1	625	1.1e-297	1031.9	hypothetical protein ARMSODRAFT_986659 [Armillaria solidipes]
g862	69496	70847	0.44	+		PBK73721.1	84.6	356	49	3	1	350	1	356	3.6e-171	610.9	WD40 repeat-like protein [Armillaria solidipes]
g863	71315	73571	0.5	+		PBK95685.1	80.4	572	107	3	9	578	7	575	1.2e-252	882.1	hypothetical protein ARMGADRAFT_811980 [Armillaria gallica]
g864	76415	77617	0.05	-		PBK98010.1	63.1	295	104	3	2	295	3	293	2.4e-103	385.2	ectomycorrhiza-regulated esterase [Armillaria gallica]
g865	77809	78552	0.34	-		SJK97298.1	60	170	62	2	12	175	6	175	1.7e-43	185.7	uncharacterized protein ARMOST_00549 [Armillaria ostoyae]
g866	78714	80273	0.58	+		KIY63349.1	47.1	310	163	1	20	328	58	367	4.5e-73	285.4	TPR-like protein [Cylindrobasidium torrendii FP15055 ss-10]
g867	82485	83378	0.56	-
g868	83651	84675	0.89	+		KIY65929.1	63.9	341	81	2	1	299	1	341	8.2e-120	439.9	hypothetical protein CYLTODRAFT_423912, partial [Cylindrobasidium torrendii FP15055 ss-10]
g869	1	4893	0.02	+
g870	2	1431	0.7	-		SJL04785.1	77.7	470	92	3	1	459	1	468	6.6e-193	683.3	probable YEF3-translation elongation factor eEF3 [Armillaria ostoyae]
g871	2108	3653	0.19	+		ADX07309.1	89.7	233	23	1	87	318	1141	1373	6e-121	444.1	putative chitin synthase [Flammulina velutipes]
g872	3887	5228	0.15	+		TBU25013.1	45.2	135	69	2	260	389	816	950	2.3e-21	113.2	hypothetical protein BD311DRAFT_670462 [Dichomitus squalens]
g873	5656	9751	0.01	-		KIY74373.1	75.5	216	53	0	40	255	50	265	1.5e-89	340.9	PTPLA-domain-containing protein [Cylindrobasidium torrendii FP15055 ss-10]
g874	10360	11628	0.64	+		KIY74374.1	67.7	331	105	2	7	336	8	337	1.9e-136	495.4	glycoside hydrolase family 16 protein [Cylindrobasidium torrendii FP15055 ss-10]
g875	11777	16467	0.56	-		SJL07518.1	92	1071	82	3	209	1277	1	1069	0	1671	probable PRP2-RNA-dependent ATPase of DEAH box family [Armillaria ostoyae]
g876	17371	18242	0.74	-		TBU25013.1	37.5	208	124	3	53	255	744	950	9.7e-29	137.1	hypothetical protein BD311DRAFT_670462 [Dichomitus squalens]
g877	1	1092	0.97	+
g878	2325	2974	0.14	-
g879	3652	5472	0.08	+
g880	1	1607	0.03	+		XP_003027160.1	41	417	94	6	59	323	1056	1472	4.1e-67	265	hypothetical protein SCHCODRAFT_258691 [Schizophyllum commune H4-8]
g881	1	152	0.39	-
g882	1013	1392	0.25	-
g883	1000	2389	0.33	+		KIK56686.1	30.1	349	204	9	3	324	21	356	3.1e-27	132.5	hypothetical protein GYMLUDRAFT_87215 [Gymnopus luxurians FD-317 M1]
g884	2488	3312	0.67	-
g885	4259	6689	0.5	+		KIY69696.1	84.6	680	105	0	1	680	1	680	0	1256.9	glycoside hydrolase family 13 protein [Cylindrobasidium torrendii FP15055 ss-10]
g886	6983	9081	0.27	+		KIY73849.1	74.8	270	64	1	133	402	129	394	1.4e-117	433	hypothetical protein CYLTODRAFT_416504 [Cylindrobasidium torrendii FP15055 ss-10]
g887	9322	13103	0.03	-		KIY73824.1	69.2	467	137	2	1	467	1	460	3.8e-177	632.1	hypothetical protein CYLTODRAFT_416481 [Cylindrobasidium torrendii FP15055 ss-10]
g888	13166	14630	0.39	+		PBK86425.1	62.2	452	117	7	2	437	1	414	5e-134	487.6	hypothetical protein ARMGADRAFT_1017409 [Armillaria gallica]
g889	14792	16819	0.42	-		KIY73826.1	62.9	528	148	6	1	523	1	485	2.1e-171	612.1	auxin efflux carrier [Cylindrobasidium torrendii FP15055 ss-10]
g890	17533	18676	0.52	-		PBK87143.1	37.1	313	154	9	5	284	4	306	1.2e-35	160.2	hypothetical protein ARMGADRAFT_1085909 [Armillaria gallica]
g891	19186	21608	0.11	+		XP_007299026.1	52.4	534	241	6	32	556	25	554	5.4e-165	590.9	FAD-binding domain-containing protein [Stereum hirsutum FP-91666 SS1]
g892	23003	23455	0.25	-
g893	24164	25842	0.37	-		PBK69926.1	36.4	511	246	16	18	489	21	491	1.3e-61	247.3	hypothetical protein ARMSODRAFT_974989 [Armillaria solidipes]
g894	26253	27787	0.53	-		PBK69927.1	70.4	361	107	0	2	362	3	363	2.7e-141	511.5	retinal short-chain dehydrogenase/reductase [Armillaria solidipes]
g895	28220	31400	0.65	+
g896	31754	33637	0.18	-		AOC97538.1	78.1	343	12	1	101	443	19	298	7.3e-141	510.4	pathogenesis-related protein 1 [Flammulina velutipes]
g897	33702	36101	0.58	+		SJL02304.1	53.4	483	146	10	1	480	60	466	1.2e-89	340.5	related to NADH-ubiquinone oxidoreductase subunit 8 [Armillaria ostoyae]
g898	36683	38265	0.51	-		PBK69934.1	50.2	546	202	21	5	489	25	561	5.5e-89	338.2	hypothetical protein ARMSODRAFT_956755 [Armillaria solidipes]
g899	38747	39446	0.47	+		SJL02306.1	55	191	45	5	4	180	10	173	5.8e-44	187.2	related to NADH-ubiquinone oxidoreductase B16.6 subunit [Armillaria ostoyae]
g900	40091	42050	0.29	+		PBK69936.1	60.6	614	204	13	1	590	1	600	2.2e-172	615.5	hypothetical protein ARMSODRAFT_935831 [Armillaria solidipes]
g901	42346	43049	0.47	-		PBL02862.1	64.8	165	55	2	3	165	7	170	4.9e-53	217.2	acyl-CoA N-acyltransferase [Armillaria gallica]
g902	43214	48527	0.01	+		PBL02863.1	45.6	1226	610	24	45	1237	1	1202	7.4e-220	774.6	hypothetical protein ARMGADRAFT_981744 [Armillaria gallica]
g903	48638	50405	0.14	-		SJL02312.1	59.5	400	118	9	40	415	1	380	3e-86	328.9	uncharacterized protein ARMOST_05638 [Armillaria ostoyae]
g904	50506	51928	0.21	-		KII95002.1	72.2	374	92	3	2	363	3	376	7e-130	473.8	hypothetical protein PLICRDRAFT_33832 [Plicaturopsis crispa FD-325 SS-3]
g905	52471	53438	0.26	-		KIK52052.1	61	269	85	4	2	250	4	272	3.2e-80	308.1	hypothetical protein GYMLUDRAFT_88833 [Gymnopus luxurians FD-317 M1]
g906	53522	58314	0.07	+		PBK69954.1	77.3	963	195	12	1	955	1	947	0	1337	ARM repeat-containing protein [Armillaria solidipes]
g907	59003	65461	0.01	-		OJA19366.1	53.6	1505	491	19	5	1459	2	1349	0	1453.3	hypothetical protein AZE42_00424 [Rhizopogon vesiculosus]
g908	66101	67741	0.19	+		KIY69720.1	58.2	459	182	4	1	459	1	449	8.2e-151	543.5	Las1-domain-containing protein [Cylindrobasidium torrendii FP15055 ss-10]
g909	70139	71312	0.27	+		TFK43108.1	46.7	257	132	5	5	258	19	273	3e-44	188.7	hypothetical protein BDQ12DRAFT_642516 [Crucibulum laeve]
g910	71815	72342	0.97	+
g911	72590	76597	0.52	-		PPQ65596.1	63.3	1097	278	18	82	1130	89	1108	0	1242.6	hypothetical protein CVT26_000545 [Gymnopilus dilepis]
g912	76932	78353	1	-		KIY69726.1	74.6	480	105	7	3	473	7	478	4e-193	684.1	hypothetical protein CYLTODRAFT_420410 [Cylindrobasidium torrendii FP15055 ss-10]
g913	78663	79131	0.56	+		PPQ65569.1	40.2	87	52	0	36	122	99	185	2.3e-08	68.6	hypothetical protein CVT26_000518 [Gymnopilus dilepis]
g914	79698	84480	0.03	+		PBL02619.1	50.2	293	134	5	620	903	45	334	1.4e-69	275	hypothetical protein ARMGADRAFT_263370 [Armillaria gallica]
g915	84860	85546	0.47	+
g916	85906	89086	0.79	+		KIY69729.1	65.2	868	280	7	4	855	7	868	0	1129.4	Zn-dependent exopeptidase [Cylindrobasidium torrendii FP15055 ss-10]
g917	89185	90524	0.33	-		KIY69730.1	82.6	396	53	1	1	396	1	380	1.4e-180	642.1	3-isopropylmalate dehydrogenase [Cylindrobasidium torrendii FP15055 ss-10]
g918	90954	92116	0.2	+		PBK69757.1	82.4	261	41	1	84	339	194	454	1.3e-121	446	hypothetical protein ARMSODRAFT_1037140 [Armillaria solidipes]
g919	92152	92845	0.95	-		PBL02689.1	88.3	180	21	0	1	180	1	180	1.2e-86	328.9	actin-related protein ARPC3 [Armillaria gallica]
g920	93310	96919	0.2	+		XP_001884478.1	75.5	669	159	4	242	909	273	937	7e-290	1006.5	predicted protein [Laccaria bicolor S238N-H82]
g921	97382	98785	0.22	-		KIK56686.1	34.2	310	177	7	3	289	20	325	6.7e-33	151.4	hypothetical protein GYMLUDRAFT_87215 [Gymnopus luxurians FD-317 M1]
g922	99994	102077	0.12	-		PBK69766.1	62.8	530	174	11	1	511	1	526	6.9e-182	647.1	cysteine proteinase [Armillaria solidipes]
g923	102327	103835	0.54	+		SJL11557.1	31.5	479	310	9	17	479	25	501	1.6e-51	213.8	uncharacterized protein ARMOST_14962 [Armillaria ostoyae]
g924	104015	104269	0.44	-
g925	104628	105557	0.19	-		KIK82158.1	48.6	249	109	7	1	240	1	239	4.7e-25	124.8	hypothetical protein PAXRUDRAFT_154419 [Paxillus rubicundulus Ve08
g926	108238	110470	0.15	+		KIY69736.1	70.1	568	160	5	1	559	1	567	2.8e-241	844.3	glycoside hydrolase family 16 protein [Cylindrobasidium torrendii FP15055 ss-10]
g927	110731	113300	0.53	-		KIY69735.1	51.9	823	333	23	1	785	1	798	7.3e-200	707.2	hypothetical protein CYLTODRAFT_215242 [Cylindrobasidium torrendii FP15055 ss-10]
g928	1	723	0.39	+		PBK72555.1	96.8	126	4	0	1	126	51	176	1.7e-61	245.4	Pkinase-domain-containing protein [Armillaria solidipes]
g929	1	881	0.46	-		SJL15929.1	57	256	94	4	1	253	444	686	1.7e-73	285.8	uncharacterized protein ARMOST_19437 [Armillaria ostoyae]
g930	1	3520	0.05	-		KIY61685.1	57.9	893	345	7	21	886	146	1034	1.4e-279	972.2	hypothetical protein CYLTODRAFT_459658 [Cylindrobasidium torrendii FP15055 ss-10]
g931	1280	3100	0.02	+
g932	314	1846	0.43	-		KIY61748.1	62.9	496	180	2	1	493	1	495	3.3e-185	657.9	hypothetical protein CYLTODRAFT_427358 [Cylindrobasidium torrendii FP15055 ss-10]
g933	4328	5888	0.47	+		KIY61747.1	70.2	262	59	1	129	390	1	243	1.6e-67	266.9	galactose oxidase [Cylindrobasidium torrendii FP15055 ss-10]
g934	6186	8735	0.62	-		PBK88470.1	55.5	548	234	4	7	546	2	547	1.4e-161	579.7	hypothetical protein ARMGADRAFT_970953 [Armillaria gallica]
g935	9778	12553	0.27	-		PBK88470.1	56.9	522	220	3	62	580	24	543	2.4e-159	572.4	hypothetical protein ARMGADRAFT_970953 [Armillaria gallica]
g936	13091	14449	0.69	+		KIM44979.1	40.5	311	155	7	69	365	27	321	5e-58	235	hypothetical protein M413DRAFT_25370 [Hebeloma cylindrosporum h7]
g937	14659	19888	0.08	-		KIY72954.1	59.1	1733	626	23	1	1683	1	1701	0	1919.4	hypothetical protein CYLTODRAFT_387821 [Cylindrobasidium torrendii FP15055 ss-10]
g938	22682	27159	0.02	+		KIY70330.1	56.6	999	390	11	1	980	24	997	6.1e-289	1003.4	hypothetical protein CYLTODRAFT_392083 [Cylindrobasidium torrendii FP15055 ss-10]
g939	29038	30078	0.28	-		KIM44979.1	38.2	322	147	7	14	303	13	314	2.6e-52	215.7	hypothetical protein M413DRAFT_25370 [Hebeloma cylindrosporum h7]
g940	30704	31570	0.23	-		KZP04452.1	100	173	0	0	19	191	1	173	1.2e-88	335.9	40S ribosomal protein S9 [Fibularhizoctonia sp. CBS 109695]
g941	31686	32753	0.39	+		KIY62148.1	79.6	147	27	1	1	147	14	157	1.9e-59	238.8	hypothetical protein CYLTODRAFT_459235 [Cylindrobasidium torrendii FP15055 ss-10]
g942	32969	36188	0.92	-		KIY62153.1	72.1	976	252	6	10	965	18	993	3.8e-150	542.3	hypothetical protein CYLTODRAFT_361928 [Cylindrobasidium torrendii FP15055 ss-10]
g943	36282	37085	0.67	+		KIY44662.1	68	175	54	1	58	232	1	173	5.9e-65	257.3	hypothetical protein FISHEDRAFT_50938 [Fistulina hepatica ATCC 64428]
g944	37116	37913	0.96	-		KIY44663.1	73.1	268	69	1	1	265	1	268	1.2e-114	422.5	kinase-like protein [Fistulina hepatica ATCC 64428]
g945	38011	39601	0.26	+		KIY69256.1	75.4	479	89	6	1	454	1	475	1.6e-178	635.6	hypothetical protein CYLTODRAFT_394021 [Cylindrobasidium torrendii FP15055 ss-10]
g946	39822	43138	0.15	-		PBK60062.1	86.4	553	68	4	359	905	3	554	1.5e-265	925.6	AGC/NDR protein kinase [Armillaria solidipes]
g947	275	1401	0.15	+		CDO76662.1	26.7	161	86	5	40	168	23	183	0.00014	57	hypothetical protein BN946_scf184897.g1 [Trametes cinnabarina]
g948	1527	5679	0.09	+
g949	6410	7843	0.59	-		KIY68394.1	32.5	160	88	6	7	155	2	152	5.5e-06	62.4	hypothetical protein CYLTODRAFT_453551 [Cylindrobasidium torrendii FP15055 ss-10]
g950	25	4496	0.1	-		KIK53172.1	44.5	796	421	11	1	788	124	906	2.1e-178	636.7	hypothetical protein GYMLUDRAFT_942491 [Gymnopus luxurians FD-317 M1]
g951	9279	9485	0.08	-
g952	11198	11674	0.5	-
g953	13844	14830	0.11	+		PBK75253.1	53.3	75	33	1	46	118	585	659	1.6e-11	80.1	hypothetical protein ARMSODRAFT_1000886 [Armillaria solidipes]
g954	15822	19304	0.01	+
g955	1	1066	0.34	+		EEB92848.1	45.8	249	129	4	1	245	107	353	4.8e-57	231.1	hypothetical protein MPER_08580, partial [Moniliophthora perniciosa FA553]
g956	1	4722	0.33	+		SJL15315.1	36.3	826	452	23	221	1000	48	845	1.8e-126	464.2	uncharacterized protein ARMOST_18808 [Armillaria ostoyae]
g957	4751	5748	0.89	-
g958	1	639	0.73	+		TFK33525.1	40.9	149	83	4	1	147	166	311	2.1e-22	115.5	hypothetical protein BDQ12DRAFT_715773 [Crucibulum laeve]
g959	1326	1901	0.65	+
g960	1	485	0.46	-		PBK62850.1	84.6	130	20	0	1	130	667	796	2.8e-56	227.6	V0/A0 complex, 116-kDa subunit of ATPase [Armillaria solidipes]
g961	606	1169	0.8	+		KZT07523.1	69.2	107	33	0	2	108	123	229	2.1e-33	152.1	hypothetical protein LAESUDRAFT_114042 [Laetiporus sulphureus 93-53]
g962	1217	1897	0.45	+		PWW72996.1	57.9	242	66	5	1	207	347	587	3.3e-67	264.6	hypothetical protein C7212DRAFT_354227 [Tuber magnatum]
g963	2281	2595	0.57	-
g964	2	444	0.68	-		KIY63621.1	87.6	113	14	0	1	113	1	113	8.3e-57	229.2	FAD dependent oxidoreductase [Cylindrobasidium torrendii FP15055 ss-10]
g965	1851	3620	0.08	+		KIY63621.1	85.2	317	40	1	59	368	1	317	6.9e-156	560.1	FAD dependent oxidoreductase [Cylindrobasidium torrendii FP15055 ss-10]
g966	4756	6604	0.41	-
g967	6857	7540	1	+		PBK89203.1	34.8	138	64	4	35	154	43	172	4.5e-09	71.6	hypothetical protein ARMGADRAFT_1167530 [Armillaria gallica]
g968	7860	8936	0.09	-
g969	11199	12253	0.33	-		KIY67255.1	46.6	309	151	6	19	317	4	308	6.8e-48	201.1	hypothetical protein CYLTODRAFT_422665 [Cylindrobasidium torrendii FP15055 ss-10]
g970	13589	19481	0.43	+		KIY67256.1	74.1	1584	369	16	3	1551	4	1580	0	2283.8	Serine/threonine-protein kinase [Cylindrobasidium torrendii FP15055 ss-10]
g971	19611	20642	0.94	-		KIY67257.1	55.9	345	132	7	14	342	12	352	2.6e-101	378.6	hypothetical protein CYLTODRAFT_353567 [Cylindrobasidium torrendii FP15055 ss-10]
g972	21246	22972	0.6	+		SJL09895.1	62.3	512	175	3	1	494	1	512	6e-176	627.1	uncharacterized protein ARMOST_13276 [Armillaria ostoyae]
g973	23485	24128	0.76	-
g974	25058	26957	0.5	-		PBK75671.1	84.2	455	61	2	4	447	1	455	1.5e-216	761.9	DEAD-domain-containing protein [Armillaria solidipes]
g975	27173	41692	0.21	-		SJL09661.1	82.5	3925	673	6	429	4346	1	3920	0	6552.6	related to fatty acid synthase, beta and alpha chains [Armillaria ostoyae]
g976	41831	45162	0.23	+		SJL09663.1	77.9	870	160	8	1	857	1	851	0	1242.3	related to VTC4-Vacuolar Transporter Chaperone [Armillaria ostoyae]
g977	46554	48901	0.39	-		KIY69100.1	64.5	664	223	7	3	658	39	697	3.9e-239	837.4	hypothetical protein CYLTODRAFT_421025 [Cylindrobasidium torrendii FP15055 ss-10]
g978	50192	52212	0.27	-		PBL03597.1	43.4	629	317	17	1	603	1	616	1.6e-114	423.3	hypothetical protein ARMGADRAFT_1004314 [Armillaria gallica]
g979	52955	54543	0.55	-		PBL03596.1	65.2	488	152	9	4	482	5	483	1.5e-150	542.7	PH-domain-containing protein [Armillaria gallica]
g980	54882	55400	0.72	+		OJT02250.1	65	103	17	1	1	103	1	84	1.2e-25	125.9	Acyl-CoA-binding protein [Trametes pubescens]
g981	57538	60656	0.89	-		PBL03593.1	49.5	1042	471	26	2	1006	9	1032	2.6e-218	768.8	hypothetical protein ARMGADRAFT_1157686 [Armillaria gallica]
g982	62205	65404	0.27	+		SJL09676.1	81.7	372	65	3	373	742	41	411	2.9e-174	622.1	related to Prk1p [Armillaria ostoyae]
g983	65486	66449	0.96	-		KIY64997.1	57.7	194	48	4	1	161	1	193	9.6e-13	84	hypothetical protein CYLTODRAFT_445638 [Cylindrobasidium torrendii FP15055 ss-10]
g984	69619	71629	0.19	+		KIY69104.1	67.4	552	150	3	1	526	1	548	1.7e-221	778.5	lanosterol 14-alpha-demethylase [Cylindrobasidium torrendii FP15055 ss-10]
g985	71799	73200	0.39	-		KIY64999.1	67.6	413	97	3	2	377	1	413	4.5e-139	504.2	glycoside hydrolase family 10 protein [Cylindrobasidium torrendii FP15055 ss-10]
g986	73941	75082	0.24	-		KIY64999.1	55.5	229	64	2	63	253	107	335	4.4e-58	234.6	glycoside hydrolase family 10 protein [Cylindrobasidium torrendii FP15055 ss-10]
g987	75513	76578	0.11	-		ADX07327.1	88.7	266	28	1	1	264	82	347	1.7e-127	465.3	putative endo-1,4-beta-xylanase precursor [Flammulina velutipes]
g988	80185	81366	0.2	-		KIY66312.1	46.6	324	171	2	1	323	1	323	3.1e-80	308.5	alpha/beta-hydrolase [Cylindrobasidium torrendii FP15055 ss-10]
g989	81860	82528	0.14	+		SJL05026.1	72.1	122	33	1	32	153	19	139	5.8e-39	170.6	uncharacterized protein ARMOST_08398 [Armillaria ostoyae]
g990	82898	83218	0.96	-		KIY63624.1	80.7	109	18	1	1	106	330	438	6e-41	176.4	FAD dependent oxidoreductase [Cylindrobasidium torrendii FP15055 ss-10]
g991	1	665	0.25	+
g992	1	978	0.22	-
g993	1683	4749	0.85	+		RDB28214.1	34.9	870	500	21	15	837	23	873	1.2e-124	457.6	hypothetical protein Hypma_001371 [Hypsizygus marmoreus]
g994	5850	7477	0.4	+		KIY62779.1	36.6	352	215	5	60	406	5	353	2.1e-50	209.9	hypothetical protein CYLTODRAFT_426666 [Cylindrobasidium torrendii FP15055 ss-10]
g995	273	634	0.15	-
g996	2525	3118	0.47	+		XP_001830158.2	28.8	208	116	7	16	197	189	390	5.2e-06	61.2	hypothetical protein CC1G_09318 [Coprinopsis cinerea okayama7#130]
g997	48	1366	0.19	+		KIY61687.1	66.4	268	58	7	92	350	1	245	3e-66	262.3	hypothetical protein CYLTODRAFT_495117 [Cylindrobasidium torrendii FP15055 ss-10]
g998	2058	12782	0.01	+		KIY65127.1	70.2	1635	459	13	551	2175	14	1629	0	2173.7	P-loop containing nucleoside triphosphate hydrolase protein [Cylindrobasidium torrendii FP15055 ss-10]
g999	13316	14128	0.89	-		XP_001828214.1	36	172	99	6	23	191	19	182	3.8e-15	92	hypothetical protein CC1G_02795 [Coprinopsis cinerea okayama7#130]
g1000	14507	15730	0.23	+
g1001	16201	17491	0.55	+
g1002	172	1201	0.93	+		KIM37020.1	32.8	128	72	3	204	331	184	297	2.7e-05	59.7	hypothetical protein M413DRAFT_448748 [Hebeloma cylindrosporum h7]
g1003	1004	2145	0.21	-
g1004	3315	7222	0.05	+		KIY63697.1	78.8	684	126	4	360	1043	38	702	0	1078.5	chaps-domain-containing protein [Cylindrobasidium torrendii FP15055 ss-10]
g1005	7611	9071	0.16	-		XP_007301163.1	22	449	298	13	42	446	48	488	6.8e-17	98.6	hypothetical protein STEHIDRAFT_153990 [Stereum hirsutum FP-91666 SS1]
g1006	9922	11242	0.08	+		PBK69393.1	30	217	138	6	50	263	116	321	9.7e-10	74.3	hypothetical protein ARMSODRAFT_957006 [Armillaria solidipes]
g1007	11489	13300	0.41	-		KZV63600.1	24.6	508	294	17	2	444	5	488	2.7e-17	100.1	hypothetical protein PENSPDRAFT_757834 [Peniophora sp. CONT]
g1008	14541	15419	0.99	+		KIY62925.1	50.5	299	129	8	1	292	1	287	6.5e-69	270.8	hypothetical protein CYLTODRAFT_403940 [Cylindrobasidium torrendii FP15055 ss-10]
g1009	15651	16864	0.42	-		KIY69912.1	59.5	321	119	6	1	311	1	320	2.8e-102	381.7	hypothetical protein CYLTODRAFT_208692 [Cylindrobasidium torrendii FP15055 ss-10]
g1010	17724	20416	0.02	+		KIY72746.1	63.6	522	178	5	23	535	34	552	4.6e-182	647.9	FAD-linked oxidoreductase [Cylindrobasidium torrendii FP15055 ss-10]
g1011	21693	22294	0.61	-		KIY69908.1	67.8	152	45	2	18	165	2	153	1e-50	209.5	small heat shock protein [Cylindrobasidium torrendii FP15055 ss-10]
g1012	22489	23384	0.59	+		PBK63343.1	64.2	254	85	2	1	248	1	254	4.1e-88	334.3	Der1-like protein [Armillaria solidipes]
g1013	24165	24604	0.55	-		KIY69914.1	66.9	127	33	3	3	128	2	120	5.4e-36	160.2	hypothetical protein CYLTODRAFT_420230 [Cylindrobasidium torrendii FP15055 ss-10]
g1014	26898	28152	0.53	+		KIY69913.1	51.1	333	163	0	1	333	11	343	1.1e-91	346.7	hypothetical protein CYLTODRAFT_208691 [Cylindrobasidium torrendii FP15055 ss-10]
g1015	28469	29188	0.52	-		KIK97211.1	29	217	114	9	39	222	3	212	4.1e-05	58.5	hypothetical protein PAXRUDRAFT_825186 [Paxillus rubicundulus Ve08
g1016	29666	33976	0.08	+		PBK84947.1	65.8	556	186	3	403	956	2	555	6.2e-217	764.2	acetyl-CoA synthetase-like protein [Armillaria gallica]
g1017	34199	35983	0.32	-		ADX07304.1	95.8	424	18	0	1	424	1	424	2e-236	827.8	putative endoglucanase [Flammulina velutipes]
g1018	39327	41185	0.05	-		RDB18697.1	46.7	458	231	4	3	450	4	458	4.5e-107	398.3	Salicylaldehyde dehydrogenase [Hypsizygus marmoreus]
g1019	41907	42933	0.28	-		ACV60538.1	57.7	284	103	5	18	292	5	280	1.3e-81	313.2	endo-beta-N-acetylglucosaminidase [Flammulina velutipes]
g1020	45004	48935	0.07	+		PBK63373.1	55.9	1205	431	16	1	1158	1	1152	0	1147.1	hypothetical protein ARMSODRAFT_963270 [Armillaria solidipes]
g1021	49261	50394	0.43	+		ESK86951.1	70.5	319	94	0	20	338	15	333	1.5e-122	449.1	glucokinase regulator family [Moniliophthora roreri MCA 2997]
g1022	50471	51697	0.83	-		AUB29460.1	94.5	326	17	1	1	326	1	325	3.1e-181	644	SAM-dependent methyltransferase [Flammulina velutipes]
g1023	52011	53103	0.47	-		KIY71363.1	28.3	283	177	6	1	273	1	267	4.9e-19	105.1	hypothetical protein CYLTODRAFT_450858 [Cylindrobasidium torrendii FP15055 ss-10]
g1024	53577	56020	0.49	+		KIY63685.1	60	568	205	3	30	577	1	566	7.8e-199	703.4	cytochrome P450 monooxygenase pc-2 [Cylindrobasidium torrendii FP15055 ss-10]
g1025	57520	58203	0.56	+		SJL12815.1	33.1	157	93	4	4	151	3	156	5.9e-08	67.4	related to peroxisomal half ABC transporter [Armillaria ostoyae]
g1026	701	2087	0.25	+		KIY65004.1	38.4	422	237	7	16	427	4	412	4.1e-64	255.4	hypothetical protein CYLTODRAFT_492641 [Cylindrobasidium torrendii FP15055 ss-10]
g1027	2	462	0.24	-
g1028	34	835	0.33	-		ADX07303.1	61.6	138	50	3	9	146	565	699	5.4e-36	161	putative laccase 1 [Flammulina velutipes]
g1029	2686	4020	1	+		PBK72491.1	55.3	443	151	13	5	440	3	405	9.4e-104	387.1	hypothetical protein ARMSODRAFT_761024 [Armillaria solidipes]
g1030	4422	5113	0.75	-		PBK72489.1	68.3	164	51	1	1	164	1	163	6.4e-56	226.9	hypothetical protein ARMSODRAFT_954193 [Armillaria solidipes]
g1031	5925	6806	0.41	+		ADX07303.1	63.1	179	57	4	1	175	526	699	1.5e-50	209.5	putative laccase 1 [Flammulina velutipes]
g1032	7936	8940	0.83	-		PBK66902.1	39.6	298	164	7	13	300	73	364	6.1e-55	224.6	hypothetical protein ARMSODRAFT_330636 [Armillaria solidipes]
g1033	11100	14151	0.04	-		KIY68873.1	83.9	492	78	1	308	798	1	492	5e-241	844	alcohol dehydrogenase [Cylindrobasidium torrendii FP15055 ss-10]
g1034	15384	17344	0.35	-		KIY71862.1	44.3	677	297	24	5	637	7	647	3e-111	412.5	hypothetical protein CYLTODRAFT_407797 [Cylindrobasidium torrendii FP15055 ss-10]
g1035	17644	19036	0.72	+		TFK39865.1	71.5	375	104	2	1	374	1	373	3.4e-147	531.2	aminopeptidase [Crucibulum laeve]
g1036	20322	21007	0.26	+		EEB96184.1	75	92	23	0	33	124	12	103	5.9e-30	140.2	hypothetical protein MPER_04725, partial [Moniliophthora perniciosa FA553]
g1037	22010	24642	0.56	+		PBK92497.1	91.8	698	54	2	1	695	1	698	0	1227.2	Adaptor protein complex beta subunit [Armillaria gallica]
g1038	24817	26299	0.46	-		PBK85310.1	53.7	335	135	3	21	354	14	329	3.1e-92	348.6	UbiA-domain-containing protein [Armillaria gallica]
g1039	28051	30649	0.41	+		PBK92496.1	71.6	539	147	4	4	541	3	536	3.6e-230	807.4	glucan endo-1,6-beta-glucosidase [Armillaria gallica]
g1040	31154	31685	0.01	+		KIY71902.1	94.4	125	7	0	1	125	86	210	2.8e-61	244.2	vacuolar protein sorting-associated protein 28 [Cylindrobasidium torrendii FP15055 ss-10]
g1041	31811	33748	0.29	-		KIY71912.1	65.8	486	140	3	2	485	1	462	6.6e-159	570.5	carbohydrate esterase family 4 protein [Cylindrobasidium torrendii FP15055 ss-10]
g1042	875	3081	0.34	-		SJL00766.1	43.9	638	327	16	14	633	231	855	1.1e-148	537	uncharacterized protein ARMOST_04080 [Armillaria ostoyae]
g1043	1	295	0.93	+
g1044	247	450	0.43	-
g1045	1	409	0.47	+
g1046	1	4970	0.73	+		GAT44597.1	53.9	1276	513	13	1	1274	1259	2461	0	1392.9	polyprotein, partial [Mycena chlorophos]
g1047	45	1009	0.4	-
g1048	1307	3287	0.05	+		KIY73298.1	39.8	299	131	12	262	532	241	518	3.3e-27	133.3	hypothetical protein CYLTODRAFT_258156 [Cylindrobasidium torrendii FP15055 ss-10]
g1049	4872	6873	0.8	-		SJL11103.1	21	566	361	18	30	554	341	861	2.4e-07	67.4	uncharacterized protein ARMOST_14506 [Armillaria ostoyae]
g1050	2	277	0.48	-
g1051	2	1116	0.2	-		KIY72595.1	43.7	245	121	4	65	293	909	1152	1.5e-36	163.3	hypothetical protein CYLTODRAFT_486241 [Cylindrobasidium torrendii FP15055 ss-10]
g1052	1625	4422	0.7	+		PBK61879.1	87	354	42	4	158	509	48	399	6.2e-174	620.9	Pkinase-domain-containing protein, partial [Armillaria solidipes]
g1053	216	545	0.37	-
g1054	1	2147	0.51	-		PPQ96823.1	57.1	706	280	9	5	706	1323	2009	3.1e-218	768.1	hypothetical protein CVT26_006235 [Gymnopilus dilepis]
g1055	2	1831	0.06	-		ADX07302.1	77.6	156	33	1	253	408	182	335	9.7e-63	250.8	putative peroxiredoxin Q [Flammulina velutipes]
g1056	532	2270	0.52	+		KIY61154.1	39.9	208	99	7	366	562	2	194	1.4e-19	107.8	hypothetical protein CYLTODRAFT_415635 [Cylindrobasidium torrendii FP15055 ss-10]
g1057	270	1514	0.04	+		TFK61872.1	80.3	218	41	1	81	298	1	216	4.5e-97	364.4	small oligopeptide transporter, partial [Pluteus cervinus]
g1058	574	1002	0.56	-		KIY66788.1	94.5	109	6	0	1	109	74	182	1.9e-50	208	alpha-L RNA-binding motif-containing protein [Cylindrobasidium torrendii FP15055 ss-10]
g1059	1753	4951	0.75	+		PBK73147.1	49.5	874	378	21	1	857	1	828	1.9e-173	619.8	hypothetical protein ARMSODRAFT_953627 [Armillaria solidipes]
g1060	6633	8028	0.26	-
g1061	8703	9508	0.03	-		KIY73285.1	39.5	147	81	3	1	144	13	154	5.4e-18	101.3	HMG-box [Cylindrobasidium torrendii FP15055 ss-10]
g1062	9962	12983	0.13	+		PBL01984.1	46.6	762	332	24	74	798	7	730	5.6e-126	461.8	hypothetical protein ARMGADRAFT_234567 [Armillaria gallica]
g1063	14715	16348	0.42	+		SJL01360.1	81.4	440	82	0	11	450	17	456	8.9e-211	742.7	related to cyclopropane-fatty-acyl-phospholipid synthase [Armillaria ostoyae]
g1064	16855	17883	0.7	+		KIY73284.1	32.3	189	88	6	168	341	182	345	1.8e-09	73.6	hypothetical protein CYLTODRAFT_417244 [Cylindrobasidium torrendii FP15055 ss-10]
g1065	20332	23362	0.72	-		SJL11103.1	43.3	413	213	7	122	519	102	508	7e-75	292.4	uncharacterized protein ARMOST_14506 [Armillaria ostoyae]
g1066	24525	27223	0.34	-		PBK99383.1	48.4	339	150	7	1	320	154	486	4.6e-70	276.2	hypothetical protein ARMGADRAFT_500737 [Armillaria gallica]
g1067	27989	29904	0.25	+		KZV87590.1	38.4	138	74	3	148	274	6	143	8.4e-17	98.2	hypothetical protein EXIGLDRAFT_752159 [Exidia glandulosa HHB12029]
g1068	30001	30963	0.58	-		PBK73144.1	61.2	67	23	1	1	64	1	67	3.2e-16	95.5	hypothetical protein ARMSODRAFT_717825 [Armillaria solidipes]
g1069	31565	32879	0.27	-		SJL17533.1	34.9	301	165	8	1	289	1	282	1.3e-31	147.1	uncharacterized protein ARMOST_21085 [Armillaria ostoyae]
g1070	34117	36532	0.2	+		PBL01914.1	70.6	700	197	7	1	696	1	695	1.4e-276	961.8	alpha/beta-hydrolase [Armillaria gallica]
g1071	2	337	0.77	-		SJL11103.1	56.9	51	19	2	46	94	34	83	6.2e-05	56.6	uncharacterized protein ARMOST_14506 [Armillaria ostoyae]
g1072	1663	4777	0.81	+		PBK69468.1	43.4	505	266	9	20	510	2	500	1.3e-100	377.9	hypothetical protein ARMSODRAFT_164162 [Armillaria solidipes]
g1073	8283	9762	0.18	-		SJL03905.1	61.9	465	146	3	2	435	4	468	8.6e-158	566.6	uncharacterized protein ARMOST_07262 [Armillaria ostoyae]
g1074	11245	14333	0.13	-		PBK70383.1	46.2	489	230	10	27	501	31	500	1e-120	444.1	cytochrome P450 [Armillaria solidipes]
g1075	15181	16204	0.72	-		PBK92413.1	58.5	234	60	8	49	250	68	296	4.1e-64	254.6	hypothetical protein ARMGADRAFT_159682 [Armillaria gallica]
g1076	18496	19647	0.62	-		KIY63816.1	56.3	261	109	3	2	260	3	260	4.8e-79	304.7	hypothetical protein CYLTODRAFT_446378 [Cylindrobasidium torrendii FP15055 ss-10]
g1077	20370	20840	0.68	-		ESK94505.1	65.3	167	39	2	6	153	5	171	1.2e-53	219.2	diaminohydroxyphosphoribosylamino-pyrimidine deaminase [Moniliophthora roreri MCA 2997]
g1078	21095	21979	0.23	+		KDQ10605.1	33.7	252	138	6	5	238	10	250	3.2e-26	128.6	hypothetical protein BOTBODRAFT_163721 [Botryobasidium botryosum FD-172 SS1]
g1079	22260	25715	0.01	-		PBK59752.1	67	572	181	5	147	712	1	570	1.3e-219	772.7	FAD-binding domain-containing protein [Armillaria solidipes]
g1080	27760	28547	0.92	-		KIY66934.1	66.8	226	66	3	1	226	1	217	3.3e-52	214.9	hypothetical protein CYLTODRAFT_354093 [Cylindrobasidium torrendii FP15055 ss-10]
g1081	28629	31611	0.25	+		KIY66935.1	79	143	27	1	1	143	1	140	9.3e-57	231.5	hypothetical protein CYLTODRAFT_422949 [Cylindrobasidium torrendii FP15055 ss-10]
g1082	33280	33727	0.52	+
g1083	34026	41137	0.01	-		SJL11108.1	34.4	799	427	19	921	1666	24	778	1.8e-100	378.3	uncharacterized protein ARMOST_14511 [Armillaria ostoyae]
g1084	42027	42580	0.67	-
g1085	211	3434	0.37	-		RDB17742.1	42.9	751	410	7	194	939	8	744	1.8e-161	580.1	RNA-directed DNA polymerase from mobile element jockey [Hypsizygus marmoreus]
g1086	2	721	0.55	-
g1087	29	352	0.66	+		GAT53001.1	63.4	112	33	2	1	106	1005	1114	3.1e-29	137.5	predicted protein [Mycena chlorophos]
g1088	1	407	0.61	+
g1089	2	1484	0.1	-
g1090	1	871	0.61	+		ESK88561.1	36.9	176	108	1	5	180	256	428	1.5e-27	132.9	hypothetical protein Moror_3176 [Moniliophthora roreri MCA 2997]
g1091	3855	4758	0.42	-		PBK78433.1	35.6	225	121	8	29	248	241	446	1.3e-21	113.6	hypothetical protein ARMSODRAFT_1011012 [Armillaria solidipes]
g1092	5322	6508	0.09	-		XP_019639525.1	31.9	94	51	2	152	245	326	406	0.00024	56.2	PREDICTED: uncharacterized protein LOC109481412 [Branchiostoma belcheri]
g1093	200	595	0.64	+
g1094	2682	3787	0.03	-
g1095	5633	7004	0.44	-
g1096	226	3460	0.12	-		PPR06046.1	25.9	522	295	21	136	630	56	512	8.6e-23	119.4	hypothetical protein CVT26_007519 [Gymnopilus dilepis]
g1097	3563	12595	0.59	-		RDB18869.1	47.3	2758	1255	33	266	3001	136	2717	0	2069.7	hypothetical protein Hypma_014481 [Hypsizygus marmoreus]
g1098	2	458	0.62	-		PAV16360.1	47.2	142	75	0	1	142	80	221	6.8e-38	166.8	hypothetical protein PNOK_0798000 [Pyrrhoderma noxium]
g1099	1	2485	0.03	+		KIY65991.1	45.2	93	44	1	415	500	271	363	3.8e-11	79.7	hypothetical protein CYLTODRAFT_423871 [Cylindrobasidium torrendii FP15055 ss-10]
g1100	2889	7294	0.57	-		RDB29425.1	46.8	1318	570	33	50	1281	5	1277	4.2e-291	1011.1	5'-3' exoribonuclease 1 [Hypsizygus marmoreus]
g1101	2	631	0.11	-		PPQ80569.1	45.8	83	43	2	58	138	66	148	2.5e-10	75.1	hypothetical protein CVT25_001603 [Psilocybe cyanescens]
g1102	864	1417	0.66	-
g1103	2	1243	0.15	-		KIN94450.1	32.3	223	136	6	75	293	17	228	3.4e-17	99.4	hypothetical protein M404DRAFT_168313 [Pisolithus tinctorius Marx 270]
g1104	1383	2776	0.85	+		OBZ70899.1	49.2	423	202	5	4	415	52	472	3e-107	398.7	hypothetical protein A0H81_09541, partial [Grifola frondosa]
g1105	1167	1787	0.8	-
g1106	2086	3038	0.37	-		PBK74292.1	42.9	210	112	2	63	264	75	284	4.4e-40	174.9	hypothetical protein ARMSODRAFT_1001205 [Armillaria solidipes]
g1107	1	1873	0.55	+		PPQ99689.1	48.4	552	271	9	5	554	9	548	3.5e-132	481.9	hypothetical protein CVT26_009115 [Gymnopilus dilepis]
g1108	1877	5733	0.28	-		KII88046.1	22.8	1361	735	48	2	1193	437	1650	5.6e-42	183.3	hypothetical protein PLICRDRAFT_30508 [Plicaturopsis crispa FD-325 SS-3]
g1109	2	410	0.55	-		PBK77804.1	38.1	113	54	2	1	97	1	113	0.00073	53.1	hypothetical protein ARMSODRAFT_946680 [Armillaria solidipes]
g1110	2	656	0.39	-
g1111	1127	1731	0.96	-		PBK90151.1	95.2	147	7	0	1	147	1	147	1.2e-50	209.1	putative RPL28-60S large subunit ribosomal protein L27a.e [Armillaria gallica]
g1112	2429	2976	0.48	+		PBK68757.1	70.7	150	37	3	1	146	1	147	2.1e-52	214.9	RBP11-like subunits of RNA polymerase [Armillaria solidipes]
g1113	3492	5118	0.77	+		PBK79671.1	32.8	516	318	14	3	502	8	510	2.2e-59	240	hypothetical protein ARMGADRAFT_977597 [Armillaria gallica]
g1114	5711	6599	0.13	-		KIY67387.1	72.1	233	59	2	1	228	1	232	2.5e-84	321.6	hypothetical protein CYLTODRAFT_376171 [Cylindrobasidium torrendii FP15055 ss-10]
g1115	7199	10442	0.03	-		KIY67376.1	67	336	95	7	371	694	71	402	2.6e-108	402.9	hypothetical protein CYLTODRAFT_454483 [Cylindrobasidium torrendii FP15055 ss-10]
g1116	2	266	0.71	-
g1117	1	987	0.73	+		PBK84863.1	29.3	266	159	6	20	263	124	382	2.3e-22	116.3	hypothetical protein ARMGADRAFT_597313 [Armillaria gallica]
g1118	2175	3275	0.12	+		ADX07331.1	53.8	333	77	8	1	283	1	306	1.3e-69	273.1	putative hydrophobin [Flammulina velutipes]
g1119	77	1464	0.45	+
g1120	1830	3350	0.39	+		KIM80375.1	28.3	237	142	8	36	263	65	282	5.1e-13	85.9	hypothetical protein PILCRDRAFT_89650 [Piloderma croceum F 1598]
g1121	3776	6771	0.52	-		KIY72462.1	21.9	1022	626	31	9	927	6	958	4.7e-28	136.7	hypothetical protein CYLTODRAFT_417860 [Cylindrobasidium torrendii FP15055 ss-10]
g1122	2	418	0.7	-		EEB91688.1	54.9	82	36	1	6	86	5	86	3.2e-16	94	hypothetical protein MPER_09919, partial [Moniliophthora perniciosa FA553]
g1123	1752	3539	0.79	-
g1124	3648	12481	0.1	-		KIK33454.1	31.2	1547	951	26	1192	2683	162	1650	2.1e-206	730.7	hypothetical protein CY34DRAFT_18358 [Suillus luteus UH-Slu-Lm8-n1]
g1125	12753	13394	0.02	+
g1126	14894	16809	0.03	+		KIY65018.1	63.1	401	98	13	93	471	1	373	2.3e-77	299.7	HLH-domain-containing protein [Cylindrobasidium torrendii FP15055 ss-10]
g1127	20578	21518	0.8	-		PBK67844.1	39.6	298	164	6	7	292	6	299	1.6e-51	213	hypothetical protein ARMSODRAFT_303822 [Armillaria solidipes]
g1128	207	942	0.41	-
g1129	1782	2484	0.37	+
g1130	902	3729	0.01	-		PBL03642.1	57.7	362	126	9	281	638	1	339	1.4e-95	360.5	WLM-domain-containing protein [Armillaria gallica]
g1131	4634	6149	0.43	-		PBK83108.1	38.2	432	222	6	34	447	38	442	7.8e-64	254.6	hypothetical protein ARMGADRAFT_679182 [Armillaria gallica]
g1132	6298	7963	0.24	+		PBL03680.1	33.3	360	140	9	1	354	1	266	9.6e-32	147.9	hypothetical protein ARMGADRAFT_952759 [Armillaria gallica]
g1133	11022	11658	0.73	+		PBK76802.1	81.9	138	24	1	21	158	24	160	8.9e-57	229.6	hypothetical protein ARMSODRAFT_948642 [Armillaria solidipes]
g1134	12035	13628	0.99	-		KIY72374.1	48.2	384	186	7	85	456	97	479	6.6e-93	351.3	hypothetical protein CYLTODRAFT_388737, partial [Cylindrobasidium torrendii FP15055 ss-10]
g1135	14763	19784	0.81	-		KIY72373.1	41.6	1529	726	32	100	1552	106	1543	7.7e-254	887.5	hypothetical protein CYLTODRAFT_417957 [Cylindrobasidium torrendii FP15055 ss-10]
g1136	21698	23441	0.97	+		KIY72372.1	64.9	433	131	8	1	422	1	423	2.2e-126	462.6	hypothetical protein CYLTODRAFT_417956 [Cylindrobasidium torrendii FP15055 ss-10]
g1137	25425	26485	0.57	+
g1138	26874	28619	0.24	+		PBK83108.1	55.1	535	187	10	43	550	38	546	3.7e-148	535	hypothetical protein ARMGADRAFT_679182 [Armillaria gallica]
g1139	1168	1906	0.57	+		KIY60910.1	50.7	221	109	0	8	228	30	250	2.6e-57	231.9	hypothetical protein CYLTODRAFT_495472 [Cylindrobasidium torrendii FP15055 ss-10]
g1140	23	1070	0.13	-
g1141	213	1295	0.22	-		PBK58844.1	69.1	220	61	2	6	218	5	224	1.2e-84	322.8	hypothetical protein ARMSODRAFT_967353 [Armillaria solidipes]
g1142	1348	2437	0.48	+		KIY74328.1	38.6	399	143	9	1	307	1	389	1.6e-52	216.5	hypothetical protein CYLTODRAFT_484647 [Cylindrobasidium torrendii FP15055 ss-10]
g1143	2560	3878	0.33	-		PBK58849.1	69.9	332	93	2	21	345	1	332	7.9e-130	473.4	hypothetical protein ARMSODRAFT_946017 [Armillaria solidipes]
g1144	3945	4567	0.45	-		PBK58848.1	75.5	155	38	0	1	155	1	155	1.3e-63	252.3	hypothetical protein ARMSODRAFT_1091033 [Armillaria solidipes]
g1145	5284	7337	0.7	-		KIY69426.1	42.3	615	297	18	8	591	21	608	1.4e-87	334	hypothetical protein CYLTODRAFT_488928 [Cylindrobasidium torrendii FP15055 ss-10]
g1146	8303	9438	0.4	+		KIY70245.1	35.3	303	148	8	104	360	154	454	1.3e-26	130.6	hypothetical protein CYLTODRAFT_488283 [Cylindrobasidium torrendii FP15055 ss-10]
g1147	9825	12910	0.37	+		KIY74321.1	59.6	861	305	13	1	848	1	831	2.3e-228	802	hypothetical protein CYLTODRAFT_484641 [Cylindrobasidium torrendii FP15055 ss-10]
g1148	13210	13850	0.18	+		KIY74322.1	41.7	192	93	4	1	174	1	191	4.6e-25	124.4	hypothetical protein CYLTODRAFT_448083 [Cylindrobasidium torrendii FP15055 ss-10]
g1149	13982	19594	0.2	-		SJK97462.1	66.7	1233	324	15	1	1202	1	1177	0	1550.8	uncharacterized protein ARMOST_00714 [Armillaria ostoyae]
g1150	19836	20977	0.23	+		KIY74325.1	80.6	346	67	0	1	346	1	346	1.3e-148	535.8	electron transfer flavo protein, alpha subunit [Cylindrobasidium torrendii FP15055 ss-10]
g1151	21067	21701	0.4	+		KIM41146.1	37.6	210	96	2	4	179	10	218	1.1e-31	146.4	hypothetical protein M413DRAFT_445859 [Hebeloma cylindrosporum h7]
g1152	21853	23084	0.94	-		PBK87822.1	72.9	354	75	1	6	359	7	339	1.2e-101	379.8	hypothetical protein ARMGADRAFT_1085150 [Armillaria gallica]
g1153	309	1505	0.42	+		KIY70992.1	81.3	315	53	4	14	326	2	312	3.7e-150	540.8	hypothetical protein CYLTODRAFT_346712 [Cylindrobasidium torrendii FP15055 ss-10]
g1154	1952	2438	0.67	-
g1155	2825	4849	0.13	-		KIY72948.1	59	525	172	10	1	486	1	521	1.3e-144	523.1	DUF803-domain-containing protein [Cylindrobasidium torrendii FP15055 ss-10]
g1156	4942	6458	0.35	+		KIY72947.1	67.8	354	113	1	1	354	1	353	3.7e-135	491.1	WD40 repeat-like protein [Cylindrobasidium torrendii FP15055 ss-10]
g1157	6630	8471	0.43	-		KIY72949.1	43.1	594	305	10	28	599	9	591	7.6e-120	441	hypothetical protein CYLTODRAFT_417461 [Cylindrobasidium torrendii FP15055 ss-10]
g1158	8766	9512	0.94	+		KIY70365.1	46.2	210	111	1	1	208	1	210	5.4e-41	177.6	hypothetical protein CYLTODRAFT_419837 [Cylindrobasidium torrendii FP15055 ss-10]
g1159	9625	10435	0.97	-		KIY62903.1	74.7	253	59	2	1	252	1	249	2.2e-81	312	TFIID-31kDa-domain-containing protein [Cylindrobasidium torrendii FP15055 ss-10]
g1160	10579	11294	0.91	+		PBL02229.1	89.7	185	18	1	1	184	1	185	1.1e-85	325.9	FeS cluster assembly scaffold IscU [Armillaria gallica]
g1161	11592	13133	0.59	-		KIY72952.1	67.6	441	129	9	1	435	1	433	3.8e-150	541.2	ACBP-domain-containing protein [Cylindrobasidium torrendii FP15055 ss-10]
g1162	17631	18959	0.31	-		SJL14570.1	28.8	316	186	11	79	384	153	439	2.8e-14	89.7	uncharacterized protein ARMOST_18033 [Armillaria ostoyae]
g1163	19217	19966	0.96	+		TFK42930.1	74.6	248	63	0	1	248	1	248	3.4e-103	384.4	EAP30/Vps36 family-domain-containing protein [Crucibulum laeve]
g1164	20175	22219	0.57	+		KIY72964.1	70.9	313	84	2	1	312	1	307	2.9e-114	422.5	SMAD/FHA domain-containing protein [Cylindrobasidium torrendii FP15055 ss-10]
g1165	22549	22943	0.59	+		PPQ95489.1	79.6	54	11	0	24	77	6	59	2.1e-14	87.8	hypothetical protein CVT26_008517 [Gymnopilus dilepis]
g1166	23674	24927	0.15	+		SJL14570.1	26.7	359	237	11	1	350	75	416	2.3e-13	86.7	uncharacterized protein ARMOST_18033 [Armillaria ostoyae]
g1167	25051	26921	0.08	+		PBK65853.1	47.8	335	149	11	26	338	21	351	1.5e-65	260.4	hypothetical protein ARMSODRAFT_960749 [Armillaria solidipes]
g1168	27221	29278	0.13	+		SJL15758.1	32.9	434	205	7	155	530	207	612	4.4e-50	209.1	uncharacterized protein ARMOST_19263 [Armillaria ostoyae]
g1169	414	1464	0.65	-
g1170	1363	2610	0.82	+
g1171	5835	7322	0.22	-		PBK69524.1	34.9	172	99	5	10	171	74	242	3.2e-13	85.9	hypothetical protein ARMSODRAFT_1018915 [Armillaria solidipes]
g1172	7676	9048	0.65	-		KIY63625.1	26.3	331	211	10	67	371	88	411	1.6e-10	77.4	hypothetical protein CYLTODRAFT_425937 [Cylindrobasidium torrendii FP15055 ss-10]
g1173	1030	1371	0.84	+
g1174	1	1932	0.09	+		KIY73519.1	54.1	146	67	0	135	280	409	554	1.8e-39	172.9	acyl-CoA oxidase [Cylindrobasidium torrendii FP15055 ss-10]
g1175	3392	3991	0.87	-		KIY72521.1	74.9	199	49	1	1	198	1	199	1.6e-82	315.5	GINS complex, Psf1 component [Cylindrobasidium torrendii FP15055 ss-10]
g1176	4046	8516	0.24	+		SJL07513.1	57.5	1123	430	15	9	1090	11	1127	0	1194.9	uncharacterized protein ARMOST_10863 [Armillaria ostoyae]
g1177	1	574	0.42	+
g1178	1	594	0.97	+
g1179	2	1146	0.71	-
g1180	1	774	0.31	+		KTB38619.1	46.6	161	84	2	1	159	308	468	1.1e-30	143.3	putative CMGC/SRPK protein kinase [Moniliophthora roreri]
g1181	2284	3708	0.29	+		KIY67871.1	70.8	319	91	2	1	317	1	319	4.8e-134	487.3	glycoside hydrolase family 16 protein [Cylindrobasidium torrendii FP15055 ss-10]
g1182	6499	12540	0.02	+		KIY70253.1	43.1	696	204	15	730	1274	311	965	6.4e-137	498.8	hypothetical protein CYLTODRAFT_371381 [Cylindrobasidium torrendii FP15055 ss-10]
g1183	12882	16171	0.97	-		PBK79915.1	91.4	986	83	2	4	989	6	989	0	1754.6	plasma-membrane proton-e [Armillaria gallica]
g1184	1	1254	0.66	+		PBL00343.1	79	319	67	0	1	319	1163	1481	3.4e-148	534.3	hypothetical protein ARMGADRAFT_916371 [Armillaria gallica]
g1185	1426	3299	0.25	-		KIY73410.1	69.2	464	134	5	42	502	18	475	6.1e-184	653.7	DUF1479-domain-containing protein [Cylindrobasidium torrendii FP15055 ss-10]
g1186	3861	4938	0.33	+		KIY63603.1	61.1	306	108	1	4	309	6	300	1.7e-104	389	NAD(P)-binding protein [Cylindrobasidium torrendii FP15055 ss-10]
g1187	5223	7082	0.21	+		PBL00390.1	52	490	195	15	1	480	17	476	3.9e-109	405.2	hypothetical protein ARMGADRAFT_376590 [Armillaria gallica]
g1188	7382	8645	0.8	-		KIY73391.1	71.2	323	88	3	1	321	1	320	7e-133	483.4	cytochrome-b5 reductase [Cylindrobasidium torrendii FP15055 ss-10]
g1189	8933	10690	0.27	+		PBK76567.1	93.9	363	20	1	1	361	1	363	1.3e-196	695.3	mitogen activated protein kinase [Armillaria solidipes]
g1190	10919	13001	0.31	-		KIY73420.1	80.3	345	68	0	1	345	1164	1508	8.2e-162	580.1	ABC-transporter [Cylindrobasidium torrendii FP15055 ss-10]
g1191	1	764	0.51	+		KIY62977.1	52.3	214	94	5	1	211	179	387	5.5e-49	204.1	hypothetical protein CYLTODRAFT_473141 [Cylindrobasidium torrendii FP15055 ss-10]
g1192	232	2159	0.75	-		PBL02820.1	75.5	220	49	3	311	526	335	553	1.4e-82	317	hypothetical protein ARMGADRAFT_1058115 [Armillaria gallica]
g1193	2339	4718	0.61	+		KIY73729.1	67.2	537	172	3	43	576	4	539	5.9e-215	756.9	PLP-dependent transferase [Cylindrobasidium torrendii FP15055 ss-10]
g1194	5007	6056	0.83	+		KIY73728.1	70.7	256	74	1	1	255	1	256	9.4e-96	359.8	14-3-3 protein [Cylindrobasidium torrendii FP15055 ss-10]
g1195	6143	7465	0.62	-		RDX55435.1	87.1	350	45	0	3	352	8	357	4.5e-181	643.7	Deoxyhypusine synthase [Polyporus brumalis]
g1196	7607	14125	0.28	+		PBK69799.1	71.9	1878	480	14	14	1864	8	1865	0	2550	Sec7-domain-containing protein [Armillaria solidipes]
g1197	14229	17951	0.47	-		KIY73779.1	59.3	1124	372	16	10	1097	7	1081	8e-253	883.6	hypothetical protein CYLTODRAFT_386449 [Cylindrobasidium torrendii FP15055 ss-10]
g1198	18199	20166	0.85	+		PBK69797.1	82.9	573	96	1	1	573	1	571	3.5e-244	854	hypothetical protein ARMSODRAFT_956594 [Armillaria solidipes]
g1199	20277	21559	0.97	-		PBK63793.1	70.7	355	99	3	20	374	19	368	6.6e-151	543.5	BNR/Asp-box repeat protein [Armillaria solidipes]
g1200	22106	22652	0.88	+		KIY73778.1	82.8	145	24	1	1	144	1	145	2.7e-60	241.1	Sedlin [Cylindrobasidium torrendii FP15055 ss-10]
g1201	22820	26025	0.67	-		KIY73777.1	58	999	398	10	44	1032	1	987	0	1068.1	hypothetical protein CYLTODRAFT_406490 [Cylindrobasidium torrendii FP15055 ss-10]
g1202	26981	29075	0.06	+		KIY68237.1	39.3	359	164	10	51	403	4	314	3.6e-41	179.1	hypothetical protein CYLTODRAFT_443505 [Cylindrobasidium torrendii FP15055 ss-10]
g1203	29429	31528	0.96	-		KIY73772.1	51.6	723	265	18	11	681	6	695	1.7e-149	539.7	hypothetical protein CYLTODRAFT_485275 [Cylindrobasidium torrendii FP15055 ss-10]
g1204	32174	34988	0.51	-		KIY73773.1	66.4	948	266	18	1	922	1	921	0	1093.2	SAICAR synthase-like protein [Cylindrobasidium torrendii FP15055 ss-10]
g1205	35985	37614	0.94	+
g1206	38009	40159	0.95	-		SJL02182.1	56.2	683	204	12	1	635	1	636	7.3e-140	507.7	uncharacterized protein ARMOST_05508 [Armillaria ostoyae]
g1207	40307	41023	0.99	+		TFK43236.1	73.6	193	51	0	3	195	5	197	1.9e-75	292	mitochondrial 18 KDa protein-domain-containing protein [Crucibulum laeve]
g1208	41213	44803	0.03	-		PBK69818.1	87.2	335	43	0	99	433	81	415	7.4e-160	574.3	IF-2B-domain-containing protein [Armillaria solidipes]
g1209	44990	48465	0.29	+		SJL02189.1	68	883	238	10	2	854	67	934	0	1166.4	related to 5'-3' exoribonuclease 2 [Armillaria ostoyae]
g1210	1	276	0.5	-
g1211	786	1430	0.85	+		KIY69125.1	63.3	196	58	4	12	194	2	196	1.9e-62	248.8	hypothetical protein CYLTODRAFT_350240 [Cylindrobasidium torrendii FP15055 ss-10]
g1212	1525	1998	0.91	-		PBK65881.1	50.7	140	53	5	20	147	9	144	1.4e-25	125.9	hypothetical protein ARMSODRAFT_379046 [Armillaria solidipes]
g1213	2402	3404	0.74	-		PBK65880.1	73.3	258	69	0	1	258	1	258	7.1e-104	386.7	NAD(P)-binding protein [Armillaria solidipes]
g1214	3776	5632	0.53	-		PBK65885.1	68.2	513	162	1	1	512	896	1408	4.5e-204	720.7	hypothetical protein ARMSODRAFT_939973 [Armillaria solidipes]
g1215	138	2666	0.06	+		KIY61307.1	32.7	226	148	3	613	838	524	745	8.2e-24	122.5	hypothetical protein CYLTODRAFT_459967 [Cylindrobasidium torrendii FP15055 ss-10]
g1216	2856	5299	0.13	+		RDB16200.1	60.4	728	262	6	46	751	125	848	1.8e-259	905.2	Transposon Tf2-6 polyprotein [Hypsizygus marmoreus]
g1217	6436	7276	0.6	+
g1218	100	1516	0.18	-		XP_007318566.1	46.6	73	33	1	253	325	429	495	1.3e-06	63.9	hypothetical protein SERLADRAFT_468033 [Serpula lacrymans var. lacrymans S7.9]
g1219	467	3241	0.38	+		PBK60627.1	34.6	769	401	12	152	855	166	897	1.1e-111	414.5	hypothetical protein ARMSODRAFT_921980 [Armillaria solidipes]
g1220	2	718	0.83	-		EEB91041.1	44.9	138	76	0	66	203	477	614	1.7e-23	119.4	hypothetical protein MPER_10671, partial [Moniliophthora perniciosa FA553]
g1221	100	8936	0.04	-		KIY67882.1	74.8	2027	468	11	485	2500	1	1995	0	2897.1	clathrin-coated vesicle protein [Cylindrobasidium torrendii FP15055 ss-10]
g1222	9804	11379	0.63	-		KDQ22230.1	47.4	441	211	4	6	436	10	439	9e-107	397.1	hypothetical protein PLEOSDRAFT_1086943 [Pleurotus ostreatus PC15]
g1223	12149	16280	0.11	+		XP_018178755.1	80.5	539	97	3	545	1076	1	538	2.3e-265	925.2	metalloprotease protein [Purpureocillium lilacinum]
g1224	16612	18082	0.99	-		SJK98533.1	62.9	463	159	6	1	454	1	459	1.4e-155	559.3	uncharacterized protein ARMOST_01801 [Armillaria ostoyae]
g1225	18147	19990	0.32	+		KIY72645.1	51.4	360	164	4	5	356	11	367	3.3e-85	325.5	RNI-like protein [Cylindrobasidium torrendii FP15055 ss-10]
g1226	20192	22635	0.11	-		KIY72640.1	76.1	326	78	0	2	327	4	329	2.6e-143	518.8	glycoside hydrolase family 53 protein [Cylindrobasidium torrendii FP15055 ss-10]
g1227	1240	4141	0.05	+		SJL11029.1	27.2	268	178	6	189	451	48	303	8.9e-19	105.5	uncharacterized protein ARMOST_14430 [Armillaria ostoyae]
g1228	4391	6093	0.54	-		PBK80604.1	53.3	533	228	8	13	531	11	536	3.3e-148	535	hypothetical protein ARMGADRAFT_1002902 [Armillaria gallica]
g1229	6142	7765	0.46	+		KIY63879.1	60.5	395	138	9	9	395	5	389	2.1e-131	478.8	WD40 repeat-like protein [Cylindrobasidium torrendii FP15055 ss-10]
g1230	7931	10053	0.1	-		PBK81572.1	49.3	347	124	7	8	348	4	304	6.5e-79	304.3	hypothetical protein ARMGADRAFT_1020212, partial [Armillaria gallica]
g1231	10551	11584	0.99	-		KIY70478.1	64.2	288	103	0	1	288	1	288	5.1e-106	394	Phosphoenolpyruvate/pyruvate domain-containing protein [Cylindrobasidium torrendii FP15055 ss-10]
g1232	12334	14450	0.08	+		PBK71989.1	54.5	448	168	4	1	412	1	448	7.4e-138	500.7	hypothetical protein ARMSODRAFT_954789 [Armillaria solidipes]
g1233	14665	17540	0.19	-		PBK69538.1	74.5	518	108	5	1	510	1	502	6.6e-211	743.8	ubiquitin carboxyl-terminal hydrolase 6 [Armillaria solidipes]
g1234	17644	18326	0.89	+		PBK69537.1	62.6	211	61	2	1	194	1	210	3.5e-55	224.6	B-cell receptor-associated 31-like protein [Armillaria solidipes]
g1235	19573	21035	0.63	-		KIY67653.1	34.7	412	233	11	1	391	1	397	3.1e-48	202.6	hypothetical protein CYLTODRAFT_490483 [Cylindrobasidium torrendii FP15055 ss-10]
g1236	22779	24640	0.39	-		PBK85788.1	53.9	527	216	9	3	508	2	522	1.8e-154	555.8	hypothetical protein ARMGADRAFT_1017871 [Armillaria gallica]
g1237	26974	28082	0.18	+		XP_024334897.1	67.4	218	63	2	1	218	1	210	1e-63	253.1	hypothetical protein POSPLADRAFT_1185506 [Postia placenta MAD-698-R-SB12]
g1238	28835	30730	0.25	+		PBK85785.1	41.9	571	256	18	3	523	4	548	9.8e-100	374	hypothetical protein ARMGADRAFT_555149 [Armillaria gallica]
g1239	31379	32433	0.87	-		TFK49760.1	78.3	249	53	1	4	252	2	249	3.3e-114	421	cyanamide hydratase [Heliocybe sulcata]
g1240	33804	34571	0.55	-		KIY63881.1	54.8	259	101	4	1	255	56	302	1.7e-65	259.2	hypothetical protein CYLTODRAFT_402592 [Cylindrobasidium torrendii FP15055 ss-10]
g1241	35507	36973	0.74	+		PBK69448.1	34.7	274	175	3	106	378	111	381	1.1e-39	174.1	hypothetical protein ARMSODRAFT_957071 [Armillaria solidipes]
g1242	37112	39493	0.16	-		KDR78264.1	32.9	359	239	2	6	363	2	359	1.2e-42	184.5	hypothetical protein GALMADRAFT_119275 [Galerina marginata CBS 339.88]
g1243	39806	41366	0.42	+		PBK69446.1	26.8	261	157	8	188	439	41	276	2.1e-13	87	hypothetical protein ARMSODRAFT_1018853 [Armillaria solidipes]
g1244	41403	42490	0.48	-		KIY67627.1	55.8	317	132	4	8	317	5	320	7.4e-90	340.5	hypothetical protein CYLTODRAFT_396708 [Cylindrobasidium torrendii FP15055 ss-10]
g1245	42808	43518	0.16	+		PBK86290.1	39.7	78	45	1	10	87	4	79	8.9e-07	63.5	hypothetical protein ARMGADRAFT_540520 [Armillaria gallica]
g1246	44251	48866	0.01	-		SJL14895.1	27.7	401	254	9	67	439	19	411	1.1e-25	129	uncharacterized protein ARMOST_18371 [Armillaria ostoyae]
g1247	49845	52426	0.1	+		KIY63096.1	37.8	704	395	19	50	739	23	697	5e-110	408.7	hypothetical protein CYLTODRAFT_458419 [Cylindrobasidium torrendii FP15055 ss-10]
g1248	52921	54064	0.96	-
g1249	54630	59869	0.01	+		PBK59662.1	45.5	895	408	21	175	1051	3	835	2e-191	679.9	hypothetical protein ARMSODRAFT_848553, partial [Armillaria solidipes]
g1250	60722	61892	0.49	+		PBK87980.1	25	280	180	11	18	285	143	404	4.2e-09	72.4	hypothetical protein ARMGADRAFT_1084957 [Armillaria gallica]
g1251	63288	65492	0.42	+		KIY67644.1	65	483	150	5	6	475	21	497	7.6e-168	600.1	G-alpha-domain-containing protein [Cylindrobasidium torrendii FP15055 ss-10]
g1252	65932	68155	0.39	-		PBK85775.1	79	682	106	11	1	672	1	655	7e-260	906.4	sodium/hydrogen exchanger [Armillaria gallica]
g1253	68465	68986	0.74	+		KIY70407.1	68	172	54	1	2	173	5	175	2e-65	258.5	hypothetical protein CYLTODRAFT_419764 [Cylindrobasidium torrendii FP15055 ss-10]
g1254	69176	69949	0.94	-		KIM47096.1	36.7	177	102	6	24	200	36	202	1.5e-17	99.8	hypothetical protein M413DRAFT_440626 [Hebeloma cylindrosporum h7]
g1255	69999	71135	0.17	+
g1256	72275	72877	0.81	-
g1257	73017	74688	0.47	+		PBK61519.1	23	413	250	13	80	455	47	428	4e-08	69.7	hypothetical protein ARMSODRAFT_1064734 [Armillaria solidipes]
g1258	74826	75104	0.82	+
g1259	75284	76566	0.19	+
g1260	79903	82192	0.59	+		KIY73009.1	68.5	216	68	0	151	366	3	218	2.6e-74	290	hypothetical protein CYLTODRAFT_318169, partial [Cylindrobasidium torrendii FP15055 ss-10]
g1261	86374	87447	0.5	+		PBK84887.1	27	282	181	9	4	279	171	433	4.1e-09	72.4	hypothetical protein ARMGADRAFT_1131991 [Armillaria gallica]
g1262	87594	88883	0.38	+
g1263	89343	90641	0.69	+
g1264	91305	91712	0.41	+
g1265	1148	2449	0.29	-		KIM74717.1	34.9	252	109	5	11	210	10	258	2e-31	146.4	hypothetical protein PILCRDRAFT_695592 [Piloderma croceum F 1598]
g1266	3313	3984	0.23	-		KIM74717.1	49.3	138	65	2	7	142	88	222	2.6e-26	128.6	hypothetical protein PILCRDRAFT_695592 [Piloderma croceum F 1598]
g1267	5001	5482	0.9	+
g1268	213	1306	0.03	+
g1269	1	1260	0.55	+		PBL02152.1	22.7	251	164	6	26	270	174	400	6.2e-05	58.5	hypothetical protein ARMGADRAFT_1005579 [Armillaria gallica]
g1270	3442	6066	0.57	-		SJL01578.1	88.3	760	86	2	1	757	1	760	0	1379.4	probable 3-isopropylmalate dehydratase [Armillaria ostoyae]
g1271	6486	8960	0.06	+		SJL08570.1	80.3	463	90	1	33	495	50	511	3.7e-218	767.3	related to putative tartrate transporter [Armillaria ostoyae]
g1272	13762	16014	0.76	-		KIY72886.1	48.6	669	306	10	55	708	79	724	8.6e-158	567.4	hypothetical protein CYLTODRAFT_485867 [Cylindrobasidium torrendii FP15055 ss-10]
g1273	16867	17895	0.75	-
g1274	18110	19451	0.21	+		KIY63482.1	47.3	402	193	9	6	397	27	419	2.2e-88	335.9	protein serine/threonine phosphatase 2C [Cylindrobasidium torrendii FP15055 ss-10]
g1275	20094	20884	0.29	+		OBZ66235.1	43.5	237	117	6	6	233	29	257	2.9e-38	168.7	hypothetical protein A0H81_13720 [Grifola frondosa]
g1276	20968	24791	0.04	-		KIY72875.1	78.2	505	104	3	1	502	1	502	2.6e-220	775.4	hexokinase [Cylindrobasidium torrendii FP15055 ss-10]
g1277	1	1981	0.32	+
g1278	1	2432	0.07	-		PBK66695.1	28.2	404	227	19	31	427	68	415	8.7e-20	108.6	hypothetical protein ARMSODRAFT_1021137 [Armillaria solidipes]
g1279	2693	3638	0.7	+		SJL03329.1	48.1	285	128	7	1	274	1	276	1.3e-56	229.9	uncharacterized protein ARMOST_06682 [Armillaria ostoyae]
g1280	5892	8050	0.06	+		KIY64057.1	41.6	623	266	18	16	548	6	620	3.6e-113	418.7	hypothetical protein CYLTODRAFT_402376 [Cylindrobasidium torrendii FP15055 ss-10]
g1281	8609	9562	0.18	-		TEB30922.1	34.4	122	58	6	1	116	1	106	2.9e-05	59.3	hypothetical protein FA13DRAFT_503053 [Coprinellus micaceus]
g1282	9939	10576	0.07	+		KIY72324.1	46.4	69	31	1	1	63	1	69	2.5e-10	75.1	hypothetical protein CYLTODRAFT_56749 [Cylindrobasidium torrendii FP15055 ss-10]
g1283	10767	12774	0.12	-		PBK61926.1	46.8	263	121	5	5	260	12	262	4.1e-49	205.7	hypothetical protein ARMSODRAFT_943494 [Armillaria solidipes]
g1284	15442	17414	0.5	+		PBK66127.1	62.6	441	139	8	145	572	1	428	2.6e-98	369.4	hypothetical protein ARMSODRAFT_370128 [Armillaria solidipes]
g1285	18944	19328	0.92	-		KIY72286.1	80.3	71	14	0	4	74	3	73	9.7e-22	112.1	hypothetical protein CYLTODRAFT_55878 [Cylindrobasidium torrendii FP15055 ss-10]
g1286	22427	27355	0.03	-		PBK89561.1	62.8	1091	370	7	3	1081	1	1067	0	1282.7	multidrug resistance-associated ABC transporter [Armillaria gallica]
g1287	28792	29130	0.56	+
g1288	29351	30652	0.32	-		PBK89673.1	74	269	70	0	1	269	1	269	2.6e-113	418.3	Aldo/keto reductase [Armillaria gallica]
g1289	31166	40803	0.02	+		KIY70000.1	62.5	1259	381	19	1342	2576	96	1287	0	1433.7	hypothetical protein CYLTODRAFT_371735 [Cylindrobasidium torrendii FP15055 ss-10]
g1290	41985	43402	0.11	+		KIY72247.1	59.4	254	61	3	1	253	124	336	2.1e-79	305.8	aromatic compound dioxygenase [Cylindrobasidium torrendii FP15055 ss-10]
g1291	1	1700	0.16	+		KIY64976.1	31	145	83	2	51	179	191	334	2.9e-11	79	hypothetical protein CYLTODRAFT_412931 [Cylindrobasidium torrendii FP15055 ss-10]
g1292	2344	2827	0.21	+
g1293	3050	3301	0.28	+
g1294	3498	4220	0.07	+
g1295	5494	7173	0.11	+		KIY67978.1	26.9	546	335	18	3	511	44	562	3.2e-29	139.8	hypothetical protein CYLTODRAFT_422016 [Cylindrobasidium torrendii FP15055 ss-10]
g1296	8314	8634	0.82	-
g1297	8676	10541	0.09	-
g1298	11552	14245	0.3	+		KIY62049.1	24.3	337	210	8	5	326	4	310	0.00013	58.5	hypothetical protein CYLTODRAFT_494904 [Cylindrobasidium torrendii FP15055 ss-10]
g1299	15757	21901	0.01	-		KIY67978.1	25.2	520	339	16	821	1316	47	540	1.3e-25	129.4	hypothetical protein CYLTODRAFT_422016 [Cylindrobasidium torrendii FP15055 ss-10]
g1300	22243	23878	0.87	+		AGG68685.1	65.3	513	129	12	2	479	3	501	9.6e-171	609.8	putative pheromone receptor [Flammulina velutipes]
g1301	26932	29939	0.04	+		KIY67978.1	27.3	494	320	14	249	721	49	524	2.8e-26	130.6	hypothetical protein CYLTODRAFT_422016 [Cylindrobasidium torrendii FP15055 ss-10]
g1302	30356	32431	0.12	+
g1303	1	6886	0.02	+		PBK66240.1	38	661	343	18	565	1176	41	683	1e-107	402.1	hypothetical protein ARMSODRAFT_354381 [Armillaria solidipes]
g1304	7064	11593	0.05	-		ADX07308.1	87.4	1125	70	7	1	1089	1	1089	0	1964.5	putative beta-galactosidase [Flammulina velutipes]
g1305	12355	13221	0.88	+		KIY65647.1	45.7	232	106	2	1	232	1	212	1.5e-47	199.5	hypothetical protein CYLTODRAFT_400128 [Cylindrobasidium torrendii FP15055 ss-10]
g1306	13890	14765	0.66	-		PBK95272.1	39.1	274	143	8	9	271	1	261	2.5e-38	169.1	hypothetical protein ARMGADRAFT_963925 [Armillaria gallica]
g1307	15547	16331	0.28	+		XP_007391412.1	39.3	173	70	4	7	172	15	159	1.3e-19	106.7	hypothetical protein PHACADRAFT_248904 [Phanerochaete carnosa HHB-10118-sp]
g1308	16397	18858	0.24	-		KZO94635.1	37.3	204	100	2	3	180	5	206	9e-31	145.2	acyl-CoA N-acyltransferase [Calocera viscosa TUFC12733]
g1309	20278	20878	0.73	-		KIY62366.1	79	181	36	2	3	182	2	181	7.4e-31	143.7	hypothetical protein CYLTODRAFT_459045 [Cylindrobasidium torrendii FP15055 ss-10]
g1310	23218	26089	0.45	-		KIY73271.1	72.7	816	188	8	1	809	1	788	0	1138.6	Sec34-domain-containing protein [Cylindrobasidium torrendii FP15055 ss-10]
g1311	26457	27391	0.44	+		KIY68454.1	30.3	211	109	6	11	218	6	181	5.7e-17	98.2	hypothetical protein CYLTODRAFT_421574 [Cylindrobasidium torrendii FP15055 ss-10]
g1312	27455	28991	0.45	-		PBK87699.1	80.9	425	81	0	1	425	25	449	5.5e-210	740	NAD(P)-binding protein [Armillaria gallica]
g1313	29447	33881	0.1	+		SJK96916.1	78.5	553	99	2	595	1127	36	588	1.4e-260	909.4	related to Ariadne-1 protein [Armillaria ostoyae]
g1314	34192	35020	0.32	-		XP_006456913.1	42.6	190	89	4	32	205	188	373	6.7e-28	134	hypothetical protein AGABI2DRAFT_78812 [Agaricus bisporus var. bisporus H97]
g1315	35164	36476	0.33	+		XP_006456913.1	38.8	387	195	10	1	365	1	367	5.7e-62	248.1	hypothetical protein AGABI2DRAFT_78812 [Agaricus bisporus var. bisporus H97]
g1316	82	433	0.75	-		KIY63621.1	83.2	95	16	0	1	95	1	95	2.3e-42	181	FAD dependent oxidoreductase [Cylindrobasidium torrendii FP15055 ss-10]
g1317	2260	3936	0.16	+		KIY63621.1	71.8	472	62	3	1	433	1	440	9e-184	652.9	FAD dependent oxidoreductase [Cylindrobasidium torrendii FP15055 ss-10]
g1318	4085	6546	0.39	+		RDB30612.1	70.7	731	167	5	10	738	1	686	3.4e-300	1040.4	putative glutamate--tRNA ligase, cytoplasmic [Hypsizygus marmoreus]
g1319	141	628	0.57	+		BAM78532.1	96.3	109	4	0	1	109	242	350	1.2e-55	225.3	serine proteinase of peptidase S41 family, partial [Flammulina velutipes]
g1320	1728	3129	0.57	+		KIY64664.1	75.8	401	96	1	2	402	3	402	4.4e-180	640.6	FMN-linked oxidoreductase [Cylindrobasidium torrendii FP15055 ss-10]
g1321	3690	5077	0.54	-		KIK70280.1	40.6	387	216	8	5	387	2	378	3e-61	245.7	hypothetical protein GYMLUDRAFT_236686 [Gymnopus luxurians FD-317 M1]
g1322	5344	6519	0.05	+		GAT50060.1	37.6	181	107	3	96	274	49	225	3.3e-23	119	predicted protein [Mycena chlorophos]
g1323	7194	8836	0.58	+		KIY65529.1	68.3	533	138	17	11	524	4	524	6e-174	620.5	PSP1-domain-containing protein [Cylindrobasidium torrendii FP15055 ss-10]
g1324	2	826	0.07	-
g1325	188	4127	0.02	-		PBK69342.1	61.7	308	80	3	7	310	5	278	8.6e-101	377.9	hypothetical protein ARMSODRAFT_995387 [Armillaria solidipes]
g1326	1	470	0.76	+		PBK99076.1	91.8	122	1	1	1	113	17	138	3.5e-47	197.2	histone 3 [Armillaria gallica]
g1327	742	1835	0.41	-		PBK99086.1	50	328	138	5	7	327	7	315	3.9e-78	301.6	hypothetical protein ARMGADRAFT_1043449 [Armillaria gallica]
g1328	1909	3370	0.55	+		SJL03403.1	61.2	410	149	2	3	402	4	413	5.5e-135	490.7	uncharacterized protein ARMOST_06757 [Armillaria ostoyae]
g1329	3864	5699	0.6	+		PBK65864.1	65.2	474	157	5	1	467	1	473	2.4e-166	595.1	aspartic peptidase A1 [Armillaria solidipes]
g1330	5868	7249	0.24	-		KIY62728.1	53.2	427	190	5	3	424	6	427	1.7e-126	462.6	hypothetical protein CYLTODRAFT_494450 [Cylindrobasidium torrendii FP15055 ss-10]
g1331	7368	10602	0.6	+		KIY62725.1	59.8	346	136	2	586	931	14	356	2e-116	430.3	hypothetical protein CYLTODRAFT_404205 [Cylindrobasidium torrendii FP15055 ss-10]
g1332	10878	11969	0.78	+
g1333	13253	14905	0.19	+		SJL03422.1	68.8	433	114	5	1	422	1	423	2.2e-166	595.1	related to phosphatidylserine decarboxylase proenzyme 2 precursor [Armillaria ostoyae]
g1334	15238	16047	0.89	+		KIY68377.1	77.9	235	49	2	2	235	3	235	6.1e-102	380.2	GTP cyclohydrolase II [Cylindrobasidium torrendii FP15055 ss-10]
g1335	16890	20627	0.06	+		PBK65836.1	69.7	489	122	3	350	838	35	497	3.5e-184	655.2	MFS general substrate transporter [Armillaria solidipes]
g1336	21442	23796	0.69	-		KIY68385.1	66.1	292	91	4	154	438	3	293	8.3e-101	377.5	hypothetical protein CYLTODRAFT_395535 [Cylindrobasidium torrendii FP15055 ss-10]
g1337	24183	25067	0.42	-		ADX07288.1	87.9	239	28	1	1	239	1	238	3.2e-114	421	putative lectin [Flammulina velutipes]
g1338	25712	27668	0.95	+		KIY60815.1	71.2	569	154	5	1	566	1	562	7e-237	829.7	arginine N-methyltransferase 3 [Cylindrobasidium torrendii FP15055 ss-10]
g1339	1	671	0.56	+		KIY72334.1	73.3	191	47	1	1	191	797	983	4.2e-69	270.8	ARM repeat-containing protein [Cylindrobasidium torrendii FP15055 ss-10]
g1340	2	264	0.54	-		XP_003666470.1	62.1	66	21	1	9	70	6	71	2.1e-10	74.3	glycoside hydrolase family 71 protein [Thermothelomyces thermophilus ATCC 42464]
g1341	124	8929	0.01	+		PBK72467.1	47.9	2167	1041	37	61	2164	53	2193	0	1855.1	hypothetical protein ARMSODRAFT_954170 [Armillaria solidipes]
g1342	10679	11644	0.92	-
g1343	12208	15199	0.06	+		KIM75967.1	95.9	314	13	0	366	679	1	314	1.5e-177	632.9	hypothetical protein PILCRDRAFT_660517 [Piloderma croceum F 1598]
g1344	15995	17049	0.3	+		KDQ27438.1	36.4	242	130	6	66	290	7	241	2.1e-06	63.2	hypothetical protein PLEOSDRAFT_158676 [Pleurotus ostreatus PC15]
g1345	650	2017	0.01	+		PBK70497.1	41.5	212	72	4	34	193	91	302	3.5e-26	129	hypothetical protein ARMSODRAFT_115047 [Armillaria solidipes]
g1346	6544	7887	0.77	-		KIY70135.1	25.9	324	214	10	106	419	625	932	1.3e-15	94.4	hypothetical protein CYLTODRAFT_420104 [Cylindrobasidium torrendii FP15055 ss-10]
g1347	2	729	0.36	-		KLO05634.1	37.3	201	109	6	3	190	928	1124	3.1e-26	128.6	hypothetical protein SCHPADRAFT_839152 [Schizopora paradoxa]
g1348	2	590	0.52	-		KDQ25344.1	34.3	172	96	5	6	163	208	376	2.5e-09	72	hypothetical protein PLEOSDRAFT_1106287 [Pleurotus ostreatus PC15]
g1349	728	3913	0.17	-		KIY68316.1	48.7	466	156	13	451	852	1	447	6.3e-64	255.8	hypothetical protein CYLTODRAFT_443432 [Cylindrobasidium torrendii FP15055 ss-10]
g1350	5522	11147	0.08	+		PBK97703.1	56.7	656	254	12	3	632	4	655	2.4e-194	689.9	NCA2-domain-containing protein [Armillaria gallica]
g1351	11358	12059	0.8	+
g1352	12257	12724	0.91	-
g1353	68	1849	0.97	+		PBK58299.1	48.2	490	241	6	61	547	1	480	4.3e-112	415.2	hypothetical protein ARMSODRAFT_900593 [Armillaria solidipes]
g1354	123	1145	0.42	-		KIY61652.1	38.4	73	43	1	36	108	769	839	0.00016	57	hypothetical protein CYLTODRAFT_477306 [Cylindrobasidium torrendii FP15055 ss-10]
g1355	236	629	0.3	-
g1356	542	745	0.91	-
g1357	1	2297	0.94	+		KIY67374.1	49.5	741	288	21	7	727	380	1054	1.6e-137	500	Pkinase-domain-containing protein [Cylindrobasidium torrendii FP15055 ss-10]
g1358	2587	3318	0.99	-		KIY67378.1	64.2	240	82	2	1	240	31	266	1.5e-87	332.4	hypothetical protein CYLTODRAFT_422562 [Cylindrobasidium torrendii FP15055 ss-10]
g1359	3701	5323	0.69	-		PBK60814.1	33.3	510	326	7	8	510	8	510	3.3e-68	269.2	hypothetical protein ARMSODRAFT_965719 [Armillaria solidipes]
g1360	6418	6894	0.12	+		KIY65599.1	51.8	141	61	2	1	136	142	280	6.2e-34	153.7	hypothetical protein CYLTODRAFT_437797 [Cylindrobasidium torrendii FP15055 ss-10]
g1361	7185	8586	0.08	-		GAT46965.1	34.4	250	155	2	7	252	17	261	8.6e-31	144.1	predicted protein [Mycena chlorophos]
g1362	11399	13045	0.91	+		PBK65182.1	23.8	583	344	20	7	544	40	567	3.3e-18	103.2	hypothetical protein ARMSODRAFT_961471 [Armillaria solidipes]
g1363	14305	15271	0.65	+
g1364	15555	16883	0.33	-		KIY66969.1	56.1	419	169	2	4	407	6	424	1.1e-127	466.5	hypothetical protein CYLTODRAFT_18281 [Cylindrobasidium torrendii FP15055 ss-10]
g1365	18000	19667	0.32	-		PBK89260.1	25.6	555	295	21	56	555	53	544	1.7e-17	100.9	hypothetical protein ARMGADRAFT_970304 [Armillaria gallica]
g1366	20062	21800	0.25	-		SJL18371.1	71	300	79	3	1	298	1	294	7.9e-111	410.2	uncharacterized protein ARMOST_21959 [Armillaria ostoyae]
g1367	22559	23769	0.32	+		PBK59326.1	71.2	285	82	0	3	287	2	286	3.1e-116	427.9	NAD-P-binding protein [Armillaria solidipes]
g1368	24028	25455	0.3	+		KIY66955.1	76.1	355	82	1	5	359	6	357	4e-161	577.4	NAD-P-binding protein [Cylindrobasidium torrendii FP15055 ss-10]
g1369	25577	34227	0.01	-		KIY66962.1	56.6	424	139	6	70	485	1	387	2.1e-118	438	hypothetical protein CYLTODRAFT_422976 [Cylindrobasidium torrendii FP15055 ss-10]
g1370	34967	38218	0.03	-		PBK92420.1	64.8	721	223	9	21	717	13	726	8.3e-254	886.3	TrkH-domain-containing protein [Armillaria gallica]
g1371	38808	40567	0.99	-		KIY62584.1	51.9	582	241	13	20	569	21	595	8e-148	533.9	hypothetical protein CYLTODRAFT_494535 [Cylindrobasidium torrendii FP15055 ss-10]
g1372	42126	42751	0.12	+		KIY66968.1	47.2	144	65	2	21	163	21	154	2.6e-25	125.2	PIG-P-domain-containing protein [Cylindrobasidium torrendii FP15055 ss-10]
g1373	43007	44346	0.27	+		KIY66969.1	60.7	425	160	2	4	427	6	424	1.3e-147	532.7	hypothetical protein CYLTODRAFT_18281 [Cylindrobasidium torrendii FP15055 ss-10]
g1374	44415	45449	0.69	-
g1375	46421	47398	0.32	-
g1376	47942	49837	0.08	-
g1377	50856	53805	0.47	+		KIY68594.1	66.9	895	293	3	3	897	5	896	0	1276.5	hypothetical protein CYLTODRAFT_395089 [Cylindrobasidium torrendii FP15055 ss-10]
g1378	55660	59454	0.05	-		SJL11108.1	33.1	883	464	27	217	1040	26	840	2.4e-103	387.1	uncharacterized protein ARMOST_14511 [Armillaria ostoyae]
g1379	2	811	0.67	-		PPR07227.1	34.2	275	153	5	12	268	563	827	1.7e-31	146.4	hypothetical protein CVT24_010170 [Panaeolus cyanescens]
g1380	2	1053	0.42	-		EEB97428.1	28.2	220	147	8	86	299	42	256	1.6e-09	73.6	hypothetical protein MPER_03256, partial [Moniliophthora perniciosa FA553]
g1381	30	451	0.92	+		RDB30904.1	31.7	126	80	3	3	122	248	373	2.2e-07	65.1	hypothetical protein Hypma_004910 [Hypsizygus marmoreus]
g1382	984	1637	0.41	+
g1383	104	1902	0.34	-
g1384	2270	4342	0.08	-		SJL13405.1	44.7	313	168	2	255	567	139	446	1.4e-72	283.9	uncharacterized protein ARMOST_16848 [Armillaria ostoyae]
g1385	142	465	0.46	+		PBK64491.1	74	73	17	1	1	71	1	73	8.7e-20	105.5	hypothetical protein ARMSODRAFT_1087912 [Armillaria solidipes]
g1386	751	3467	0.24	-		PBK87521.1	61.5	806	240	12	1	745	1	797	3.2e-245	857.8	exo-beta-1,3-glucanase [Armillaria gallica]
g1387	4259	12813	0.05	-		KIY65379.1	72.9	605	163	1	1	604	1	605	5.2e-267	931.8	ALDH-like protein, partial [Cylindrobasidium torrendii FP15055 ss-10]
g1388	13312	16728	0.75	+		PBK83145.1	60.6	749	290	2	40	786	47	792	1.1e-278	969.1	glycosyltransferase family 1 protein [Armillaria gallica]
g1389	17178	17948	0.31	-		PBK79918.1	44.4	223	111	4	1	220	1	213	6.4e-45	190.7	hypothetical protein ARMGADRAFT_1021237 [Armillaria gallica]
g1390	24319	25549	0.13	-		KIY61971.1	65.3	343	114	3	1	340	1	341	3e-118	434.9	actin depolymerizing protein [Cylindrobasidium torrendii FP15055 ss-10]
g1391	2	855	0.39	-		PBK92116.1	51	196	93	2	18	210	181	376	3.7e-50	208	kinase-like protein [Armillaria gallica]
g1392	1	443	0.69	-		KJA16701.1	44.9	107	58	1	1	107	108	213	3.2e-21	110.9	hypothetical protein HYPSUDRAFT_47068 [Hypholoma sublateritium FD-334 SS-4]
g1393	1875	3816	0.47	+		KIY67214.1	66.5	472	155	2	1	472	1	469	2.8e-178	634.8	MFS general substrate transporter [Cylindrobasidium torrendii FP15055 ss-10]
g1394	4316	6458	0.65	-		PBK75089.1	66.2	648	172	12	1	638	1	611	6.8e-204	720.3	septin family protein [Armillaria solidipes]
g1395	7553	10476	0.13	-		PBK75090.1	55.7	792	312	13	30	789	28	812	5.1e-217	764.2	hypothetical protein ARMSODRAFT_951166 [Armillaria solidipes]
g1396	10975	12459	0.75	-		KIY62668.1	37.9	354	171	15	29	353	35	368	3.1e-25	126.3	hypothetical protein CYLTODRAFT_447066 [Cylindrobasidium torrendii FP15055 ss-10]
g1397	13408	15560	0.36	+		KIK52071.1	85.2	568	84	0	1	568	30	597	6e-289	1002.7	hypothetical protein GYMLUDRAFT_208278 [Gymnopus luxurians FD-317 M1]
g1398	16635	17897	0.19	-
g1399	18214	20814	0.41	+		PBK83474.1	54.1	486	217	5	1	484	1	482	1.1e-136	497.3	aldehyde dehydrogenase [Armillaria gallica]
g1400	20981	25795	0.24	-		EGN98500.1	43.5	924	503	6	20	928	541	1460	1.1e-161	581.3	hypothetical protein SERLA73DRAFT_169454 [Serpula lacrymans var. lacrymans S7.3]
g1401	1	543	0.99	+		KDR75234.1	48.9	131	66	1	1	130	794	924	3.2e-23	117.9	hypothetical protein GALMADRAFT_69452 [Galerina marginata CBS 339.88]
g1402	336	6894	0.11	+		GAT48229.1	35	1906	1093	44	111	1951	234	2059	5.7e-278	968	ATP-dependent DNA helicase [Mycena chlorophos]
g1403	203	1268	0.83	-		PBK67179.1	35.1	322	192	7	14	321	6	324	6.6e-41	177.9	hypothetical protein ARMSODRAFT_959333 [Armillaria solidipes]
g1404	1338	2108	0.29	+		TFK21843.1	64.4	45	13	1	22	63	486	530	2e-05	58.9	dynamin protein dnm1 [Coprinopsis marcescibilis]
g1405	3484	3839	0.27	-
g1406	8855	9772	0.44	-		SJL13890.1	51.5	264	109	6	4	251	7	267	2.7e-59	238.8	uncharacterized protein ARMOST_17339 [Armillaria ostoyae]
g1407	2	783	0.63	-		KIY66927.1	49.8	223	104	3	40	255	67	288	3e-57	231.9	hypothetical protein CYLTODRAFT_21173 [Cylindrobasidium torrendii FP15055 ss-10]
g1408	927	5465	0.1	+		AOC97452.1	93.1	522	11	1	571	1067	1	522	1.1e-296	1029.2	alpha-amylase [Flammulina velutipes]
g1409	5786	9352	0.36	-		PBK93445.1	58.1	1094	339	17	1	989	17	1096	1.1e-286	996.1	hypothetical protein ARMGADRAFT_1045953 [Armillaria gallica]
g1410	10738	11667	0.39	-		KIY66932.1	41.5	253	137	2	1	242	1	253	4.2e-45	191.4	hypothetical protein CYLTODRAFT_423016, partial [Cylindrobasidium torrendii FP15055 ss-10]
g1411	11809	14613	0.41	+		PBK74132.1	36	987	500	29	1	900	1	942	3.2e-74	290	hypothetical protein ARMSODRAFT_1081109 [Armillaria solidipes]
g1412	17498	18508	1	-		QBA29482.1	96.4	335	12	0	1	335	1	335	1.3e-182	648.7	Clp1 [Flammulina velutipes]
g1413	19048	19659	0.45	+		KIY66919.1	64.3	185	65	1	1	184	1	185	6.1e-57	230.3	hypothetical protein CYLTODRAFT_437252 [Cylindrobasidium torrendii FP15055 ss-10]
g1414	20047	22222	0.2	-		KIY66916.1	74.8	536	131	2	62	593	67	602	5.4e-248	866.7	hypothetical protein CYLTODRAFT_454937 [Cylindrobasidium torrendii FP15055 ss-10]
g1415	23573	26873	0.11	+		KIY66915.1	76	750	152	4	1	744	56	783	0	1209.5	glycoside hydrolase family 92 protein [Cylindrobasidium torrendii FP15055 ss-10]
g1416	26937	30819	0.19	-		KIY63560.1	75.5	1007	227	8	1	997	1	997	0	1449.5	AAA-domain-containing protein [Cylindrobasidium torrendii FP15055 ss-10]
g1417	31147	32772	0.92	+		PBK74089.1	48.1	470	230	8	27	488	34	497	1.4e-116	429.9	cytochrome P450 [Armillaria solidipes]
g1418	33071	33883	0.48	-
g1419	34324	35264	0.35	+		KIY66898.1	65.6	282	97	0	1	282	68	349	1.1e-100	376.3	hypothetical protein CYLTODRAFT_397963 [Cylindrobasidium torrendii FP15055 ss-10]
g1420	35966	39704	0.79	+		KIY66897.1	62.5	1186	355	26	5	1160	2	1127	0	1079.7	hypothetical protein CYLTODRAFT_397962 [Cylindrobasidium torrendii FP15055 ss-10]
g1421	40049	40863	0.84	+		KIY66900.1	48.4	244	123	3	4	244	3	246	8.1e-60	240.4	hypothetical protein CYLTODRAFT_422984 [Cylindrobasidium torrendii FP15055 ss-10]
g1422	48	910	0.41	+		KIJ50201.1	32.6	129	78	4	79	202	258	382	0.00059	54.7	hypothetical protein M422DRAFT_246037 [Sphaerobolus stellatus SS14]
g1423	1	501	0.89	+
g1424	84	883	0.91	-		KIY66577.1	29	210	130	6	13	218	68	262	3.7e-09	72	hypothetical protein CYLTODRAFT_29559 [Cylindrobasidium torrendii FP15055 ss-10]
g1425	196	2253	0.31	-		SJK99985.1	55.9	567	214	8	1	559	1	539	1.2e-161	579.7	uncharacterized protein ARMOST_03296 [Armillaria ostoyae]
g1426	2418	3007	0.25	+		KIY68829.1	65	103	34	1	1	101	1	103	7e-29	136.3	hypothetical protein CYLTODRAFT_421282 [Cylindrobasidium torrendii FP15055 ss-10]
g1427	3360	5109	0.25	-		PBK75459.1	47	455	201	12	96	531	90	523	1.4e-88	337	homeobox-domain-containing protein [Armillaria solidipes]
g1428	1	1285	0.08	+		PBK59314.1	33.4	293	94	5	1	197	88	375	9.7e-30	140.2	cytochrome P450 [Armillaria solidipes]
g1429	1771	2815	0.76	-		RDB17320.1	39.5	172	98	3	129	296	31	200	3.1e-21	112.5	hypothetical protein Hypma_001893 [Hypsizygus marmoreus]
g1430	38	767	0.85	+		XP_016638954.1	40.7	182	105	2	1	181	10	189	3e-30	141.7	hypothetical protein SAPIO_CDS10562 [Scedosporium apiospermum]
g1431	2210	4096	0.13	+		PPQ89890.1	41.7	576	251	10	5	514	165	721	2.1e-115	426	hypothetical protein CVT25_004812 [Psilocybe cyanescens]
g1432	4158	8121	0.02	-		KIK33848.1	22.6	969	592	34	78	968	5	893	5.7e-24	123.2	hypothetical protein CY34DRAFT_18118 [Suillus luteus UH-Slu-Lm8-n1]
g1433	8169	8789	0.71	-		KIY67039.1	41.2	160	83	3	45	204	12	160	2.1e-26	129	hypothetical protein CYLTODRAFT_353996 [Cylindrobasidium torrendii FP15055 ss-10]
g1434	1286	2059	0.38	-
g1435	3043	4131	0.36	+
g1436	23	1189	0.1	-		TFK88971.1	53.4	148	59	2	48	185	1	148	1.1e-36	163.7	acyl-CoA N-acyltransferase [Polyporus arcularius HHB13444]
g1437	1518	4314	0.16	-		SJL13084.1	27.3	194	128	7	474	657	2	192	2.8e-11	80.5	uncharacterized protein ARMOST_16521 [Armillaria ostoyae]
g1438	4695	5329	0.85	+		RDB29874.1	30.5	164	105	7	6	169	20	174	3.3e-13	85.1	hypothetical protein Hypma_013953 [Hypsizygus marmoreus]
g1439	5558	9351	0.8	-		KIY71721.1	23.1	709	440	19	7	676	9	651	5.2e-37	166.8	hypothetical protein CYLTODRAFT_487004 [Cylindrobasidium torrendii FP15055 ss-10]
g1440	9798	10312	0.36	+
g1441	10795	11836	0.75	-		PBK87216.1	68.4	98	30	1	4	101	2	98	1.1e-28	137.1	Prefoldin-domain-containing protein [Armillaria gallica]
g1442	12510	14118	0.23	+		RDB29874.1	30.1	186	113	7	52	236	5	174	1.7e-12	83.2	hypothetical protein Hypma_013953 [Hypsizygus marmoreus]
g1443	14326	16359	0.65	-		PBK70488.1	73	519	136	1	4	518	3	521	8e-227	796.2	general substrate transporter [Armillaria solidipes]
g1444	17781	18853	0.86	-		KIY71328.1	60.8	212	66	4	1	195	1	212	1.7e-60	243	cysteine proteinase [Cylindrobasidium torrendii FP15055 ss-10]
g1445	19171	20568	0.87	+		SJL08724.1	68.2	381	109	8	12	383	8	385	3.9e-114	421.4	uncharacterized protein ARMOST_12093 [Armillaria ostoyae]
g1446	20814	21631	0.9	-
g1447	24018	25111	0.04	+
g1448	2	708	0.36	-		SJL09919.1	46.2	197	74	12	15	201	18	192	4.7e-24	121.3	uncharacterized protein ARMOST_13300 [Armillaria ostoyae]
g1449	1	1200	0.33	+
g1450	294	1040	0.1	-
g1451	1849	3645	0.11	+		KIY64752.1	84.8	546	76	5	1	544	1	541	1.8e-266	927.9	kinase-like protein [Cylindrobasidium torrendii FP15055 ss-10]
g1452	4386	5641	0.3	-		KIY71839.1	48.8	363	178	4	5	363	7	365	5.9e-96	360.9	alpha/beta-hydrolase [Cylindrobasidium torrendii FP15055 ss-10]
g1453	6544	7890	0.99	+		PBK91886.1	34	467	270	9	10	443	44	505	3.8e-68	268.9	hypothetical protein ARMGADRAFT_191955 [Armillaria gallica]
g1454	7954	12819	0.01	-		PBK63091.1	69.9	501	128	4	380	861	1	497	1.1e-213	753.8	FAD/NAD(P)-binding domain-containing protein [Armillaria solidipes]
g1455	13700	16891	0.67	-		KIY71758.1	70.5	522	146	3	259	780	1	514	2.5e-216	761.9	endoplasmic reticulum protein [Cylindrobasidium torrendii FP15055 ss-10]
g1456	17640	20092	0.36	-		KIY71756.1	39.5	354	176	7	452	779	617	958	9.9e-24	122.1	hypothetical protein CYLTODRAFT_486875 [Cylindrobasidium torrendii FP15055 ss-10]
g1457	22296	23527	0.43	+		PBK70249.1	44.2	321	161	9	1	304	1	320	6e-60	241.1	hypothetical protein ARMSODRAFT_1018338 [Armillaria solidipes]
g1458	24365	25324	0.78	-		KIM83960.1	66.7	186	57	3	1	182	1	185	1.7e-57	232.6	hypothetical protein PILCRDRAFT_818992 [Piloderma croceum F 1598]
g1459	25648	29283	0.23	+		SJL01480.1	58.8	493	182	7	189	677	1	476	8.4e-143	517.7	uncharacterized protein ARMOST_04802 [Armillaria ostoyae]
g1460	29845	30063	0.4	+
g1461	30785	31861	0.22	+		KDR74393.1	30.5	341	204	12	15	335	49	376	4.3e-24	122.1	hypothetical protein GALMADRAFT_141437 [Galerina marginata CBS 339.88]
g1462	31873	35932	0.15	-		PBK73060.1	88.8	484	46	2	1	476	13	496	1.5e-240	842.8	adenylosuccinate lyase [Armillaria solidipes]
g1463	36067	41913	0.01	+		PBK80102.1	61.5	117	40	1	1104	1220	3	114	9.5e-29	139.4	hypothetical protein ARMGADRAFT_85956 [Armillaria gallica]
g1464	43131	45354	0.64	-		KIY71750.1	61.9	622	203	6	1	593	1	617	2.6e-213	751.5	translocation protein sec63 [Cylindrobasidium torrendii FP15055 ss-10]
g1465	47356	48350	0.13	+		KIY71751.1	67.8	311	97	2	1	308	2	312	9.2e-122	446.4	hypothetical protein CYLTODRAFT_486870 [Cylindrobasidium torrendii FP15055 ss-10]
g1466	48705	49890	0.65	-		PBK82879.1	23.2	314	209	9	26	321	32	331	4.3e-09	72.4	hypothetical protein ARMGADRAFT_1019483 [Armillaria gallica]
g1467	50288	51568	0.5	-		KIY71747.1	65.5	426	125	9	1	410	1	420	1.1e-103	386.7	hypothetical protein CYLTODRAFT_450421 [Cylindrobasidium torrendii FP15055 ss-10]
g1468	52537	54292	0.19	+
g1469	54715	55478	0.42	+		KIY71749.1	58.1	210	67	2	1	208	1	191	4.5e-59	237.7	Isochorismatase hydrolase [Cylindrobasidium torrendii FP15055 ss-10]
g1470	56381	58931	0.7	-		TCD67821.1	23.9	330	190	10	397	722	310	582	5.2e-14	89.7	hypothetical protein EIP91_011883 [Steccherinum ochraceum]
g1471	59142	60314	0.11	+		PBK79384.1	48.5	377	148	11	4	340	2	372	3.8e-76	295	NAD(P)-binding protein [Armillaria gallica]
g1472	60970	61711	0.4	+
g1473	62266	65874	0.2	+		PBK73201.1	84	506	81	0	362	867	11	516	2.7e-256	894.8	peroxisomal acyl-CoA-dehydrogenase [Armillaria solidipes]
g1474	67186	70433	0.03	+		PBK76431.1	32.4	364	196	10	560	876	81	441	1.9e-42	184.5	SET domain-containing protein [Armillaria solidipes]
g1475	70818	72707	0.38	+
g1476	72890	75091	0.11	+		KIY70439.1	56.1	189	59	6	61	226	55	242	1.1e-30	144.8	hypothetical protein CYLTODRAFT_488110 [Cylindrobasidium torrendii FP15055 ss-10]
g1477	76751	78135	0.15	-		SJL01439.1	30.3	370	228	11	6	363	34	385	2.4e-34	156.4	uncharacterized protein ARMOST_04761 [Armillaria ostoyae]
g1478	259	495	0.15	-
g1479	2	1987	0.78	-		OJT02422.1	39.1	647	331	17	26	662	41	634	2.2e-93	353.2	Copia protein [Trametes pubescens]
g1480	2175	4051	0.25	+		KIY61992.1	28.7	523	281	17	1	481	4	476	4.8e-37	165.6	hypothetical protein CYLTODRAFT_494940 [Cylindrobasidium torrendii FP15055 ss-10]
g1481	4540	5223	0.08	-
g1482	6410	7427	0.08	-
g1483	8259	12450	0.2	+		SJL04882.1	27.4	905	530	28	212	1054	36	875	2.1e-65	261.2	uncharacterized protein ARMOST_08253 [Armillaria ostoyae]
g1484	14903	18321	0.01	-		KIY69257.1	26.1	417	257	18	317	713	94	479	2.5e-19	107.5	hypothetical protein CYLTODRAFT_233983 [Cylindrobasidium torrendii FP15055 ss-10]
g1485	18791	19376	0.04	-
g1486	20375	20773	0.57	-
g1487	21123	22575	0.59	-		KIY69257.1	23	391	242	13	25	380	99	465	6.5e-12	82	hypothetical protein CYLTODRAFT_233983 [Cylindrobasidium torrendii FP15055 ss-10]
g1488	22905	24515	0.36	-		KIY70620.1	27.6	340	208	8	30	369	28	329	8e-14	88.6	hypothetical protein CYLTODRAFT_419577 [Cylindrobasidium torrendii FP15055 ss-10]
g1489	24652	25153	0.79	+
g1490	26196	27066	0.16	-
g1491	27432	28139	0.73	-
g1492	28656	30475	0.18	+		KIY65586.1	27.3	490	281	10	1	420	27	511	5.2e-41	178.7	hypothetical protein CYLTODRAFT_445259 [Cylindrobasidium torrendii FP15055 ss-10]
g1493	32305	34122	0.22	+		KIY69257.1	24	405	251	13	99	481	96	465	3.7e-17	99.8	hypothetical protein CYLTODRAFT_233983 [Cylindrobasidium torrendii FP15055 ss-10]
g1494	35653	36608	0.43	+
g1495	2	301	0.84	-
g1496	129	1263	0.27	+		XP_007768511.1	43.8	73	36	2	69	136	518	590	1e-07	67.4	hypothetical protein CONPUDRAFT_165309 [Coniophora puteana RWD-64-598 SS2]
g1497	400	5396	0.18	-		AOC97456.1	93.3	495	18	1	64	543	34	528	1e-279	973	alpha-amylase [Flammulina velutipes]
g1498	6622	8016	0.29	+		KIY68007.1	76.4	462	102	1	3	464	5	459	6.6e-193	683.3	general substrate transporter [Cylindrobasidium torrendii FP15055 ss-10]
g1499	9076	12730	0.09	+		KIY68008.1	79.6	559	113	1	1	559	1	558	2.6e-262	914.8	acyl-CoA oxidase [Cylindrobasidium torrendii FP15055 ss-10]
g1500	12966	14995	0.54	-		PBL03795.1	74.5	505	124	1	6	505	9	513	2e-211	745	hypothetical protein ARMGADRAFT_1070289 [Armillaria gallica]
g1501	16245	17693	0.28	+		KIY70040.1	67.9	386	109	4	14	389	24	404	1.5e-134	489.2	hypothetical protein CYLTODRAFT_371611 [Cylindrobasidium torrendii FP15055 ss-10]
g1502	21089	21871	0.33	-		PBK96521.1	50.4	244	106	8	3	240	26	260	2.1e-41	179.1	hypothetical protein ARMGADRAFT_1010166 [Armillaria gallica]
g1503	22555	28454	0.09	+		KIY70038.1	64.7	1871	548	41	1	1829	1	1800	0	1737.2	hypothetical protein CYLTODRAFT_420127 [Cylindrobasidium torrendii FP15055 ss-10]
g1504	28874	31658	0.13	+		KIY71646.1	71.2	590	161	4	1	587	1	584	1.9e-245	858.2	hypothetical protein CYLTODRAFT_345563 [Cylindrobasidium torrendii FP15055 ss-10]
g1505	31849	35501	0.28	-		KIY70042.1	74.3	907	216	3	1	900	1	897	0	1423.7	hypothetical protein CYLTODRAFT_392656 [Cylindrobasidium torrendii FP15055 ss-10]
g1506	36036	38871	0.83	-		SJL09032.1	42.9	923	389	28	1	873	1	835	6.3e-152	548.1	uncharacterized protein ARMOST_12408 [Armillaria ostoyae]
g1507	39267	42709	0.02	+		KIY72097.1	52.3	333	156	2	7	339	28	357	1.8e-92	350.1	NAD(P)-binding protein [Cylindrobasidium torrendii FP15055 ss-10]
g1508	43604	44955	0.7	+		KIY72097.1	49.7	328	162	2	3	330	24	348	2.1e-87	332.4	NAD(P)-binding protein [Cylindrobasidium torrendii FP15055 ss-10]
g1509	45067	46569	0.59	-		PBK77798.1	48.3	350	166	7	4	345	44	386	7e-77	297.7	hypothetical protein ARMSODRAFT_9645 [Armillaria solidipes]
g1510	792	2263	0.52	-		BAJ07535.1	94.7	457	24	0	1	457	1	457	9.9e-258	898.7	glycoside hydrolase family 7 [Flammulina velutipes]
g1511	3014	5428	0.08	-		KIY68119.1	56.5	278	118	1	24	298	60	337	3.8e-81	312.4	hypothetical protein CYLTODRAFT_421880 [Cylindrobasidium torrendii FP15055 ss-10]
g1512	6805	8222	0.15	+		PBK81429.1	88	374	45	0	1	374	1	374	3.6e-197	697.2	GDP-mannose 4,6-dehydratase [Armillaria gallica]
g1513	8370	9086	0.98	+		SJK98850.1	76.5	217	48	1	1	214	1	217	6e-89	337	related to Translocation protein sec62 [Armillaria ostoyae]
g1514	9251	13378	0.05	+		KIY68125.1	68.9	453	132	3	571	1015	1	452	8.7e-177	630.9	MFS general substrate transporter [Cylindrobasidium torrendii FP15055 ss-10]
g1515	14292	15273	0.65	-		PBK62916.1	36.4	176	100	7	89	255	21	193	4.3e-15	92	hypothetical protein ARMSODRAFT_980337 [Armillaria solidipes]
g1516	15753	18876	0.05	-		KIY68126.1	79.9	443	82	3	1	440	1	439	1.2e-189	673.3	Arginine biosynthesis bifunctional protein ArgJ beta chain [Cylindrobasidium torrendii FP15055 ss-10]
g1517	19946	21217	0.31	-		PBK81415.1	49.4	344	124	14	1	319	29	347	3.7e-49	205.7	hypothetical protein ARMGADRAFT_780183 [Armillaria gallica]
g1518	25098	25965	0.16	+		KIY68145.1	48.1	189	90	3	1	182	1	188	1.1e-27	133.3	hypothetical protein CYLTODRAFT_453844 [Cylindrobasidium torrendii FP15055 ss-10]
g1519	26331	27193	0.49	+		RDB15344.1	64.8	230	74	1	12	234	15	244	1.5e-76	295.8	4-O-methyl-glucuronoyl methylesterase [Hypsizygus marmoreus]
g1520	27782	30204	0.08	-		KIY68146.1	74.5	495	122	2	1	493	33	525	8.1e-232	812.8	hypothetical protein CYLTODRAFT_453845 [Cylindrobasidium torrendii FP15055 ss-10]
g1521	31242	35933	0.01	-		KIY68148.1	72.2	735	166	5	323	1055	2	700	0	1079.3	hypothetical protein CYLTODRAFT_374854 [Cylindrobasidium torrendii FP15055 ss-10]
g1522	36615	37893	0.53	+
g1523	38191	39649	0.98	-		KIY68151.1	70.4	405	118	1	41	445	43	445	1.6e-159	572.4	hypothetical protein CYLTODRAFT_421911 [Cylindrobasidium torrendii FP15055 ss-10]
g1524	40973	42173	0.47	+		KIY68152.1	58.9	270	104	4	45	307	31	300	8e-86	327	zincin [Cylindrobasidium torrendii FP15055 ss-10]
g1525	42742	43364	0.48	-		KIY68153.1	66.7	204	49	5	5	190	4	206	3.1e-32	148.3	hypothetical protein CYLTODRAFT_453851 [Cylindrobasidium torrendii FP15055 ss-10]
g1526	46108	49318	0.13	+		SJK97114.1	42.8	472	229	8	30	467	3	467	6.7e-89	339	uncharacterized protein ARMOST_00364 [Armillaria ostoyae]
g1527	51357	54013	0.36	-		KIY62380.1	83.4	548	85	3	10	553	9	554	2.7e-265	924.5	DNA repair exonuclease, partial [Cylindrobasidium torrendii FP15055 ss-10]
g1528	54214	55556	0.22	+		PBK84616.1	81.9	348	60	2	1	346	1	347	1.2e-149	539.3	hypothetical protein ARMGADRAFT_598802 [Armillaria gallica]
g1529	2	716	0.8	-		EEB91041.1	42.9	140	80	0	64	203	475	614	2.7e-21	112.1	hypothetical protein MPER_10671, partial [Moniliophthora perniciosa FA553]
g1530	2	699	0.71	-		KDQ24613.1	77.2	162	33	1	1	162	1	158	5.6e-62	246.9	polysaccharide lyase family 3 protein [Pleurotus ostreatus PC15]
g1531	1312	1992	0.74	-		KIK66985.1	55.5	110	45	2	102	207	5	114	2e-24	122.5	hypothetical protein GYMLUDRAFT_155809 [Gymnopus luxurians FD-317 M1]
g1532	91	531	0.93	+
g1533	570	2585	0.09	+		KIY71129.1	48.3	493	230	9	4	490	9	482	3.4e-126	461.8	cytochrome P450 [Cylindrobasidium torrendii FP15055 ss-10]
g1534	2938	4712	0.34	+		PBK80525.1	89.1	477	52	0	1	477	1	477	1.2e-250	875.2	glycine hydroxymethyltransferase [Armillaria gallica]
g1535	5038	5511	0.47	-
g1536	5795	6674	0.26	-		KIY73328.1	50	212	105	1	30	241	39	249	8.7e-54	220.3	hypothetical protein CYLTODRAFT_417017, partial [Cylindrobasidium torrendii FP15055 ss-10]
g1537	10172	15588	0.22	-		PPR00932.1	32	1441	798	42	174	1577	203	1498	5.7e-186	662.1	hypothetical protein CVT26_015537 [Gymnopilus dilepis]
g1538	16621	18227	0.06	-		XP_027616755.1	28.1	196	114	9	315	486	131	323	3.3e-09	73.2	hypothetical protein SCP_0803640 [Sparassis crispa]
g1539	18418	22007	0.46	+		PBK80630.1	32.3	1018	595	23	7	988	3	962	1.9e-126	463.8	hypothetical protein ARMGADRAFT_976944 [Armillaria gallica]
g1540	22530	24844	0.53	-		KIY72459.1	72.1	573	152	2	1	573	1	565	1.8e-261	911.4	glycoside hydrolase family 16 protein [Cylindrobasidium torrendii FP15055 ss-10]
g1541	26609	29518	0.9	+		RDB29367.1	48.1	953	416	27	1	889	1151	2088	2.1e-155	559.7	hypothetical protein Hypma_014910 [Hypsizygus marmoreus]
g1542	29899	34021	0.06	+		PBL03354.1	76.8	977	188	8	125	1064	82	1056	0	1421.4	hypothetical protein ARMGADRAFT_1004105 [Armillaria gallica]
g1543	37112	39376	0.43	+		KIY72464.1	64.4	382	122	10	1	374	1	376	2.3e-125	459.5	kinase-like protein [Cylindrobasidium torrendii FP15055 ss-10]
g1544	39814	42114	0.54	-		KIO32593.1	33.4	545	296	14	157	634	218	762	2.2e-61	246.9	hypothetical protein M407DRAFT_18367 [Tulasnella calospora MUT 4182]
g1545	42569	44639	0.16	+
g1546	45270	46456	0.94	-		KIY72440.1	57.6	170	68	3	160	326	164	332	9.6e-41	177.6	hypothetical protein CYLTODRAFT_343963 [Cylindrobasidium torrendii FP15055 ss-10]
g1547	46693	47635	0.93	+
g1548	48132	50549	0.3	+		KIO32593.1	32.6	631	350	20	60	620	104	729	2.6e-68	270	hypothetical protein M407DRAFT_18367 [Tulasnella calospora MUT 4182]
g1549	50822	52765	0.06	-
g1550	53208	55179	0.18	-
g1551	55428	57545	0.29	-
g1552	57852	58823	0.55	+		XP_001828214.1	36.7	166	87	5	19	177	29	183	2.4e-16	96.3	hypothetical protein CC1G_02795 [Coprinopsis cinerea okayama7#130]
g1553	59255	60121	0.31	+		XP_001828219.1	35.6	163	99	3	17	179	20	176	4.3e-17	98.6	hypothetical protein CC1G_02800 [Coprinopsis cinerea okayama7#130]
g1554	60721	62127	0.78	+		KIY72434.1	85.8	415	59	0	1	415	1	415	1.2e-225	792	mandelate racemase muconate lactonizing enzyme family protein [Cylindrobasidium torrendii FP15055 ss-10]
g1555	62550	65410	0.03	+		KIY72433.1	36.6	205	109	8	456	647	200	396	1.5e-07	68.2	hypothetical protein CYLTODRAFT_486278 [Cylindrobasidium torrendii FP15055 ss-10]
g1556	66088	70009	0.09	+		KIY72447.1	68.7	706	171	13	324	1014	1	671	1.6e-258	902.5	hypothetical protein CYLTODRAFT_367426 [Cylindrobasidium torrendii FP15055 ss-10]
g1557	74697	76058	0.51	-		KIY72540.1	44.2	77	36	3	294	366	51	124	5.8e-09	72	hypothetical protein CYLTODRAFT_449706 [Cylindrobasidium torrendii FP15055 ss-10]
g1558	79052	80137	0.44	-		PBK75928.1	35	197	101	6	153	322	151	347	4.8e-12	82	hypothetical protein ARMSODRAFT_415919 [Armillaria solidipes]
g1559	81361	84546	0.09	-		KIY72443.1	50.4	873	356	16	4	822	11	860	2.1e-242	848.6	hypothetical protein CYLTODRAFT_486286 [Cylindrobasidium torrendii FP15055 ss-10]
g1560	84724	85921	0.82	+		KIY72452.1	69.7	330	95	4	1	330	1	325	1.6e-122	449.1	hypothetical protein CYLTODRAFT_417851 [Cylindrobasidium torrendii FP15055 ss-10]
g1561	86178	88220	0.4	-		PBK96608.1	80.7	561	104	2	1	559	1	559	3.2e-226	794.3	hypothetical protein ARMGADRAFT_1010212 [Armillaria gallica]
g1562	1046	2187	0.92	-		KIY62888.1	75.1	342	71	3	4	340	8	340	1.2e-135	492.7	HAD-like protein [Cylindrobasidium torrendii FP15055 ss-10]
g1563	1	304	0.92	+		ESK95593.1	55	100	44	1	1	99	111	210	6.1e-19	103.2	hypothetical protein Moror_12667 [Moniliophthora roreri MCA 2997]
g1564	1	2194	0.43	-		KIY65374.1	83.1	385	65	0	1	385	1	385	1.4e-196	695.3	putative mandelate racemase/muconate lactonizing enzyme [Cylindrobasidium torrendii FP15055 ss-10]
g1565	2873	5881	0.03	-		PBL04423.1	43.9	312	155	6	69	368	17	320	4.8e-67	265.8	hypothetical protein ARMGADRAFT_1004982 [Armillaria gallica]
g1566	7178	8128	0.45	+
g1567	10028	10913	0.38	+
g1568	12556	13488	0.45	+
g1569	13726	14915	0.46	-		GAV98631.1	86.7	323	38	1	1	318	1	323	1.8e-152	548.5	enzyme in the non-oxidative pentose phosphate pathway [Lentinula edodes]
g1570	16542	20102	0.25	-		KIY69453.1	45.6	568	243	15	151	694	1	526	4.7e-87	332.8	hypothetical protein CYLTODRAFT_488952 [Cylindrobasidium torrendii FP15055 ss-10]
g1571	20719	21687	0.97	+		SJL11119.1	54.3	282	124	3	1	282	1	277	7.9e-80	307	related to nucleoside-diphosphate-sugar epimerase family protein [Armillaria ostoyae]
g1572	23562	34658	0.19	-		KIY70650.1	62.4	2550	911	12	3	2537	6	2522	0	3052.3	hypothetical protein CYLTODRAFT_391770 [Cylindrobasidium torrendii FP15055 ss-10]
g1573	35138	36759	0.79	+		PBK60722.1	59.6	359	142	1	6	364	2	357	4e-125	458	hypothetical protein ARMSODRAFT_1090165 [Armillaria solidipes]
g1574	37098	37803	0.96	-		SJK97872.1	52.2	201	82	4	1	195	1	193	9.5e-48	199.9	uncharacterized protein ARMOST_01127 [Armillaria ostoyae]
g1575	38851	41033	0.31	+		KIY70649.1	83.8	518	79	2	120	633	30	546	5.6e-227	797	DUF747-domain-containing protein [Cylindrobasidium torrendii FP15055 ss-10]
g1576	41928	42338	0.29	+		PBK79475.1	56.9	109	45	1	8	116	171	277	1.3e-23	119	NAD(P)-binding protein [Armillaria gallica]
g1577	43236	45866	0.09	+		KIY72626.1	59.9	618	216	6	5	616	8	599	1.1e-206	729.6	GMC oxidoreductase [Cylindrobasidium torrendii FP15055 ss-10]
g1578	46066	47276	0.66	-		KIY70637.1	54.1	305	109	9	49	338	60	348	7.7e-66	260.8	hypothetical protein CYLTODRAFT_435620 [Cylindrobasidium torrendii FP15055 ss-10]
g1579	47403	47813	0.4	+
g1580	48410	50250	0.26	-		KIY70636.1	71.3	477	129	3	6	478	4	476	4.3e-163	584.3	SET domain-containing protein [Cylindrobasidium torrendii FP15055 ss-10]
g1581	50460	52062	0.06	-		KZP14888.1	27.9	298	174	7	13	274	14	306	3e-16	96.3	hypothetical protein FIBSPDRAFT_959330 [Fibularhizoctonia sp. CBS 109695]
g1582	2	1000	0.05	-
g1583	1753	2124	0.34	-
g1584	1	888	0.99	+		SJL14075.1	64.6	294	104	0	2	295	1224	1517	4.6e-115	424.1	uncharacterized protein ARMOST_17530 [Armillaria ostoyae]
g1585	381	2547	0.13	-		PBK93011.1	22.9	603	332	21	33	528	79	655	3.1e-19	106.7	hypothetical protein ARMGADRAFT_1080207 [Armillaria gallica]
g1586	2686	2976	0.76	+
g1587	1	406	0.42	+
g1588	323	2494	0.26	+		KIY73154.1	75.9	539	117	3	1	536	1	529	1.7e-237	831.6	general substrate transporter [Cylindrobasidium torrendii FP15055 ss-10]
g1589	28	440	0.35	+
g1590	1	521	0.34	+
g1591	1	1353	0.9	+		ADX07310.1	38	469	264	12	1	450	1719	2179	1.4e-70	276.9	putative beta-glucosidase [Flammulina velutipes]
g1592	1734	2814	0.35	-		PBK99868.1	33.5	340	191	12	1	331	1	314	1.1e-30	144.1	hypothetical protein ARMGADRAFT_1008351 [Armillaria gallica]
g1593	5119	6068	0.2	+		KIY72540.1	51.4	74	32	2	162	231	51	124	1.4e-13	86.7	hypothetical protein CYLTODRAFT_449706 [Cylindrobasidium torrendii FP15055 ss-10]
g1594	540	1401	0.26	-
g1595	1495	2694	0.55	-		PBK59809.1	67.2	268	86	2	1	268	1	266	2.5e-93	352.1	Sec20-domain-containing protein [Armillaria solidipes]
g1596	2767	3737	0.86	+		SJL11354.1	72.7	275	75	0	1	275	1	275	6.9e-105	390.2	uncharacterized protein ARMOST_14757 [Armillaria ostoyae]
g1597	3897	4556	0.62	-		PBK94961.1	37.4	187	111	2	5	190	98	279	1.5e-30	142.9	hypothetical protein ARMGADRAFT_1011802 [Armillaria gallica]
g1598	1	1741	0.17	-		KIK51147.1	59.8	423	137	4	60	451	9	429	1.7e-140	509.2	hypothetical protein GYMLUDRAFT_252319 [Gymnopus luxurians FD-317 M1]
g1599	1153	1538	0.14	+
g1600	1	701	0.77	+
g1601	2	503	0.68	-		KIK51531.1	30.2	162	82	5	8	166	196	329	3.8e-05	58.2	hypothetical protein GYMLUDRAFT_251974 [Gymnopus luxurians FD-317 M1]
g1602	2	298	0.76	-		EME46292.1	43.1	109	44	3	2	95	417	522	8.2e-16	92.8	cytochrome p450-like protein [Dothistroma septosporum NZE10]
g1603	818	1054	0.92	+
g1604	78	652	0.51	-		GAT43857.1	46.3	121	59	2	1	117	570	688	1.5e-19	105.9	predicted protein, partial [Mycena chlorophos]
g1605	1	640	0.59	+		KIY66315.1	74.7	158	40	0	1	158	91	248	1.2e-58	235.7	alpha/beta-hydrolase [Cylindrobasidium torrendii FP15055 ss-10]
g1606	1	1136	0.64	+		ESK81321.1	39.6	270	131	8	1	251	364	620	1.2e-41	180.3	hypothetical protein Moror_12111, partial [Moniliophthora roreri MCA 2997]
g1607	445	3340	0.17	-		PBK99383.1	42.1	442	189	7	22	396	69	510	1.2e-71	281.6	hypothetical protein ARMGADRAFT_500737 [Armillaria gallica]
g1608	4764	5280	0.97	+
g1609	6882	7629	0.25	-
g1610	8137	11770	0.06	-		PBL03733.1	23.6	1020	536	33	61	1032	14	838	5.8e-33	153.3	hypothetical protein ARMGADRAFT_1157799 [Armillaria gallica]
g1611	14689	15446	0.18	+
g1612	16622	17900	0.29	+
g1613	18232	21218	0.26	-		SJL16730.1	31.7	628	331	14	37	613	233	813	2.2e-62	250.8	uncharacterized protein ARMOST_20259 [Armillaria ostoyae]
g1614	2	1599	0.06	-		XP_007299026.1	33.1	363	178	9	30	378	28	339	8.7e-50	207.6	FAD-binding domain-containing protein [Stereum hirsutum FP-91666 SS1]
g1615	1	307	0.49	-
g1616	27	468	0.36	-
g1617	614	2087	0.26	+		XP_009541748.1	85.8	316	26	1	86	401	1	297	4.9e-155	557.4	hypothetical protein HETIRDRAFT_32724 [Heterobasidion irregulare TC 32-1]
g1618	2843	5151	0.15	-		KIY71911.1	69.7	532	134	4	5	536	11	515	2e-201	711.8	MFS general substrate transporter [Cylindrobasidium torrendii FP15055 ss-10]
g1619	5943	8028	0.48	-		KIY71910.1	74.3	612	156	1	2	612	11	622	5.9e-282	979.5	acyltransferase ChoActase/COT/CPT [Cylindrobasidium torrendii FP15055 ss-10]
g1620	8699	9454	0.51	-		KIY71899.1	73.6	250	39	2	1	231	1	242	1.1e-100	375.9	cytochrome c and c1 heme-lyase [Cylindrobasidium torrendii FP15055 ss-10]
g1621	10784	13767	0.5	-		PBK72408.1	61.3	965	300	14	1	907	1	950	5.3e-295	1023.5	TFP11-domain-containing protein [Armillaria solidipes]
g1622	14448	15660	0.43	-		PBK99507.1	49.5	311	154	2	16	326	21	328	9.8e-82	313.5	S-adenosyl-L-methionine-dependent methyltransferase [Armillaria gallica]
g1623	16303	25121	0.04	+		PBK72403.1	70.9	1302	353	13	950	2238	1	1289	0	1736.1	CNH-domain-containing protein [Armillaria solidipes]
g1624	26271	28278	0.79	+		PBK72410.1	78	527	113	3	1	527	1	524	6.8e-234	819.7	MFS monosaccharide transporter [Armillaria solidipes]
g1625	29053	34911	0.26	-		KIY71877.1	55	1225	474	24	488	1662	51	1248	0	1278.8	cysteine proteinase [Cylindrobasidium torrendii FP15055 ss-10]
g1626	35266	36485	0.85	+		ESK89103.1	49.9	351	152	6	2	339	11	350	3.9e-87	331.6	hypothetical protein Moror_5276 [Moniliophthora roreri MCA 2997]
g1627	37272	43422	0.18	-		KIY71906.1	60.8	1179	422	13	1	1148	1	1170	0	1328.9	hypothetical protein CYLTODRAFT_389638 [Cylindrobasidium torrendii FP15055 ss-10]
g1628	43714	46557	0.35	+		PBK72462.1	80.8	684	129	2	4	687	3	684	0	1130.2	ras opposite [Armillaria solidipes]
g1629	46876	54763	0.01	-		KIY68203.1	83.1	710	82	3	1135	1825	1	691	0	1175.6	P-loop containing nucleoside triphosphate hydrolase protein [Cylindrobasidium torrendii FP15055 ss-10]
g1630	55054	56382	0.28	-
g1631	56848	65412	0.49	+		KIY71869.1	41.9	2727	1478	55	1	2668	1	2680	0	1900.6	hypothetical protein CYLTODRAFT_486816 [Cylindrobasidium torrendii FP15055 ss-10]
g1632	66347	67501	0.5	-		ESK89103.1	58.2	337	121	5	5	327	11	341	1.5e-101	379.4	hypothetical protein Moror_5276 [Moniliophthora roreri MCA 2997]
g1633	67995	69374	0.48	-		ESK89103.1	49.6	448	176	7	5	448	11	412	1.5e-112	416.4	hypothetical protein Moror_5276 [Moniliophthora roreri MCA 2997]
g1634	69743	71153	0.52	+		ESK89103.1	46.3	421	174	9	13	398	11	414	5.6e-87	331.3	hypothetical protein Moror_5276 [Moniliophthora roreri MCA 2997]
g1635	77833	80836	0.03	-		KIY71863.1	46.2	593	258	8	228	781	5	575	6.9e-126	461.5	hypothetical protein CYLTODRAFT_440956 [Cylindrobasidium torrendii FP15055 ss-10]
g1636	81928	83440	0.18	+
g1637	83625	83928	0.95	-		PBK72455.1	59.5	84	31	3	1	81	1	84	2.9e-14	87.4	hypothetical protein ARMSODRAFT_954161 [Armillaria solidipes]
g1638	84476	85253	0.73	+		PBK72454.1	57.6	262	81	9	3	234	4	265	2.9e-35	158.7	hypothetical protein ARMSODRAFT_954160 [Armillaria solidipes]
g1639	86218	87785	0.16	+		PBK72398.1	66.5	436	133	1	1	423	1	436	1.5e-167	599	DUF676-domain-containing protein [Armillaria solidipes]
g1640	88919	90457	0.25	+		SJL03833.1	26.6	538	345	17	2	502	28	552	4.1e-26	129.4	uncharacterized protein ARMOST_07190 [Armillaria ostoyae]
g1641	90754	92319	0.46	+		KIY71857.1	28.6	539	317	19	17	517	51	559	1.9e-31	147.1	hypothetical protein CYLTODRAFT_486804 [Cylindrobasidium torrendii FP15055 ss-10]
g1642	92607	98325	0.06	-		RDB30116.1	43	821	439	8	227	1027	54	865	3.2e-181	646.4	Vegetative incompatibility protein HET-E-1 [Hypsizygus marmoreus]
g1643	98590	102086	0.01	-		PBK99453.1	70.7	608	154	7	24	628	59	645	2.5e-231	812	hypothetical protein ARMGADRAFT_958833 [Armillaria gallica]
g1644	103166	104775	0.22	+		KIY63458.1	73	315	83	2	7	320	10	323	1e-139	506.1	glycoside hydrolase family 43 protein [Cylindrobasidium torrendii FP15055 ss-10]
g1645	104842	106464	1	-		KIY63974.1	26	473	305	15	4	457	12	458	1.2e-20	111.3	hypothetical protein CYLTODRAFT_493510 [Cylindrobasidium torrendii FP15055 ss-10]
g1646	106646	109447	0.4	+		PBK99491.1	72	786	205	3	3	783	7	782	0	1149.8	glycosyltransferase family 39 protein [Armillaria gallica]
g1647	110143	111653	0.11	+		TBU42947.1	27.7	314	134	8	39	284	12	300	1.2e-21	114	hypothetical protein BD309DRAFT_991348 [Dichomitus squalens]
g1648	112305	113282	0.5	+		KIY71857.1	37	235	136	4	21	244	38	271	8.7e-32	147.5	hypothetical protein CYLTODRAFT_486804 [Cylindrobasidium torrendii FP15055 ss-10]
g1649	114034	115873	0.86	+		KIY71857.1	35	560	329	14	16	560	20	559	2.1e-66	263.5	hypothetical protein CYLTODRAFT_486804 [Cylindrobasidium torrendii FP15055 ss-10]
g1650	115905	117452	0.6	-		XP_003032802.1	27	544	324	17	20	510	28	551	1.5e-28	137.5	expressed protein [Schizophyllum commune H4-8]
g1651	117657	120208	0.21	+		PBK72373.1	61.4	656	193	9	1	623	1	629	1.4e-199	706.1	Vps5-domain-containing protein [Armillaria solidipes]
g1652	128578	131745	0.84	+		ADX07310.1	51.8	846	353	12	5	833	1292	2099	1.6e-220	776.2	putative beta-glucosidase [Flammulina velutipes]
g1653	131758	132850	0.58	-		PBK99868.1	31.8	346	196	12	1	338	1	314	2.9e-31	146	hypothetical protein ARMGADRAFT_1008351 [Armillaria gallica]
g1654	134718	136652	0.36	-		KIY62942.1	51.4	591	262	5	5	573	7	594	4.5e-159	571.2	hypothetical protein CYLTODRAFT_382970 [Cylindrobasidium torrendii FP15055 ss-10]
g1655	137220	137862	0.29	-		KIY62943.1	80	155	31	0	7	161	6	160	1.1e-70	275.8	hypothetical protein CYLTODRAFT_360742 [Cylindrobasidium torrendii FP15055 ss-10]
g1656	143005	145235	0.2	-		KIY64472.1	49	520	258	3	14	529	13	529	1.2e-148	536.6	hypothetical protein CYLTODRAFT_380853 [Cylindrobasidium torrendii FP15055 ss-10]
g1657	145381	154980	0.22	+		KIY63461.1	46.6	3065	1499	42	69	3059	4	3004	0	2578.5	hypothetical protein CYLTODRAFT_493892 [Cylindrobasidium torrendii FP15055 ss-10]
g1658	155209	156007	0.85	-		PBK70742.1	70.3	185	51	2	1	182	1	184	3.7e-54	221.1	hypothetical protein ARMSODRAFT_994893 [Armillaria solidipes]
g1659	1	658	0.68	+
g1660	651	1114	0.37	+		ESK92538.1	62.1	95	34	1	6	100	5	97	1.9e-23	118.2	choline dehydrogenase [Moniliophthora roreri MCA 2997]
g1661	417	2092	0.5	+		SJL11645.1	37.7	435	242	12	1	418	1	423	4.3e-59	238.8	uncharacterized protein ARMOST_15051 [Armillaria ostoyae]
g1662	157	1816	0.19	-		PBK78108.1	75.2	440	90	3	1	421	1	440	7.4e-191	676.4	FAD/NAD(P)-binding domain-containing protein [Armillaria solidipes]
g1663	2035	5440	0.04	+		RDB21034.1	55.7	442	161	6	406	837	1	417	5.7e-94	355.5	hypothetical protein Hypma_011565 [Hypsizygus marmoreus]
g1664	5748	6786	0.31	-		KIY69968.1	52.2	138	65	1	3	140	5	141	3.4e-27	132.1	hypothetical protein CYLTODRAFT_348447 [Cylindrobasidium torrendii FP15055 ss-10]
g1665	6915	9551	0.33	+		KIY69969.1	83.2	751	97	5	1	742	1	731	0	1175.2	Adaptor protein complex beta subunit [Cylindrobasidium torrendii FP15055 ss-10]
g1666	9596	10618	0.59	-		TFK42624.1	58	283	115	2	1	279	1	283	1.2e-86	329.7	hypothetical protein BDQ12DRAFT_676516 [Crucibulum laeve]
g1667	10740	19300	0.01	+		GAT58726.1	52.4	1128	440	16	3	1115	5	1050	0	1087	GTP binding [Mycena chlorophos]
g1668	20224	21723	0.49	-		KIY70553.1	68.3	426	134	1	1	425	1	426	1.2e-177	632.5	PLP-dependent transferase [Cylindrobasidium torrendii FP15055 ss-10]
g1669	22067	24323	0.9	-		XP_001874825.1	94.8	616	32	0	2	617	3	618	0	1139.4	predicted protein [Laccaria bicolor S238N-H82]
g1670	24889	26658	0.97	+		PBL02133.1	36.6	644	282	23	4	581	14	597	2.9e-44	189.9	hypothetical protein ARMGADRAFT_1005566 [Armillaria gallica]
g1671	26813	28213	0.31	-		GAT47240.1	53.7	283	102	6	13	270	4	282	7.3e-74	287.3	predicted protein [Mycena chlorophos]
g1672	28345	29058	0.52	+		PBK78085.1	68.9	193	42	2	1	192	11	186	1.9e-64	255.4	hypothetical protein ARMSODRAFT_23222 [Armillaria solidipes]
g1673	29230	31472	0.38	-		PBK78084.1	80.3	646	89	6	1	643	1	611	1.5e-256	895.2	LETM1-domain-containing protein [Armillaria solidipes]
g1674	31761	33275	0.18	+		PBK78086.1	68.8	420	115	4	1	419	1	405	4.5e-172	614	hypothetical protein ARMSODRAFT_924373 [Armillaria solidipes]
g1675	33454	37422	0.02	+		KIY69995.1	76.9	873	161	9	78	939	20	862	0	1284.2	RabGAP/TBC [Cylindrobasidium torrendii FP15055 ss-10]
g1676	37791	40155	0.21	+		KIY69982.1	65.4	254	84	2	358	610	1	251	3.6e-90	342.4	HIT-like protein, partial [Cylindrobasidium torrendii FP15055 ss-10]
g1677	40260	41975	0.67	-		SJL00338.1	87.4	438	55	0	1	438	1	438	2.2e-217	764.6	uncharacterized protein ARMOST_03651 [Armillaria ostoyae]
g1678	42126	42546	0.89	-
g1679	42774	43042	0.7	+		SJL00340.1	75.7	70	17	0	3	72	8	77	1.5e-22	114.8	uncharacterized protein ARMOST_03653 [Armillaria ostoyae]
g1680	43169	48680	0.1	-		KIY69989.1	52.4	1522	641	22	1	1459	22	1523	0	1426	hypothetical protein CYLTODRAFT_442301 [Cylindrobasidium torrendii FP15055 ss-10]
g1681	48771	50199	0.31	+		KIY69991.1	59.3	388	143	5	1	377	1	384	2.7e-123	451.8	hypothetical protein CYLTODRAFT_328950, partial [Cylindrobasidium torrendii FP15055 ss-10]
g1682	50680	51391	0.77	-		KIY68598.1	65.9	211	72	0	5	215	1	211	1e-74	289.7	hypothetical protein CYLTODRAFT_320136, partial [Cylindrobasidium torrendii FP15055 ss-10]
g1683	51468	54527	0.93	+		KIY68599.1	72.7	979	231	18	1	964	1	958	0	1175.2	Dbl homology domain-containing protein [Cylindrobasidium torrendii FP15055 ss-10]
g1684	56082	58278	0.3	-		KZP29881.1	43.8	507	278	4	24	528	17	518	8.4e-131	477.2	cytochrome P450 [Fibularhizoctonia sp. CBS 109695]
g1685	59907	66907	0.3	-		PBK96771.1	66.5	510	150	4	1551	2056	1	493	1.4e-194	691	DNA primase large subunit [Armillaria gallica]
g1686	67883	72164	0.63	+		KIY70003.1	87	1106	139	3	2	1105	3	1105	0	1992.2	ubiquitin carboxyl-terminal hydrolase 5 [Cylindrobasidium torrendii FP15055 ss-10]
g1687	72407	73248	0.61	-		KIY70009.1	71.4	185	52	1	1	185	1	184	9.5e-66	260	translocation protein sec66 [Cylindrobasidium torrendii FP15055 ss-10]
g1688	73489	75707	0.56	+		PBK78073.1	83.5	462	72	1	1	458	1	462	4.5e-226	793.5	citrate synthase [Armillaria solidipes]
g1689	75901	77243	0.81	-		KIY70006.1	83.1	254	39	1	1	254	1	250	1.8e-108	402.5	hypothetical protein CYLTODRAFT_371742 [Cylindrobasidium torrendii FP15055 ss-10]
g1690	77404	79815	0.76	+		PBK78075.1	80.8	652	112	5	46	686	49	698	5.6e-289	1003	protein phosphatase 2A regulatory B subunit [Armillaria solidipes]
g1691	80171	81548	0.53	-		SJL05124.1	27.9	437	256	15	3	413	1	404	2e-23	120.2	uncharacterized protein ARMOST_08497 [Armillaria ostoyae]
g1692	82426	83861	0.11	-		PBK94866.1	70.6	384	87	7	1	370	6	377	6e-144	520.4	hypothetical protein ARMGADRAFT_1011737 [Armillaria gallica]
g1693	84010	88346	0.04	-		SJL07710.1	42.2	1217	625	31	27	1198	71	1254	3.9e-245	858.2	uncharacterized protein ARMOST_11060 [Armillaria ostoyae]
g1694	88563	90583	0.18	+		XP_001874829.1	45.1	672	207	14	1	558	1	624	8.5e-94	354.4	predicted protein [Laccaria bicolor S238N-H82]
g1695	90675	96536	0.03	-		KTB39888.1	47.2	1541	676	36	39	1530	12	1463	0	1246.1	hypothetical protein WG66_7589 [Moniliophthora roreri]
g1696	97989	100292	0.45	-		PBK78064.1	85.8	592	84	0	1	592	1	592	0	1068.9	asparagine synthase [Armillaria solidipes]
g1697	100523	101501	0.89	+		PBK78065.1	73.3	258	69	0	1	258	1	258	2.8e-100	374.8	phosphatidylinositol synthase [Armillaria solidipes]
g1698	101680	105196	0.47	+		KIY64235.1	60.1	1099	357	18	1	1071	1	1046	0	1184.1	AAA-domain-containing protein [Cylindrobasidium torrendii FP15055 ss-10]
g1699	105313	106580	0.39	-		KIY64236.1	62.8	242	85	4	2	241	21	259	4e-78	301.6	hypothetical protein CYLTODRAFT_438273 [Cylindrobasidium torrendii FP15055 ss-10]
g1700	106992	108452	0.21	+		KIY67340.1	40.5	444	223	9	1	433	47	460	2.1e-76	296.2	hypothetical protein CYLTODRAFT_422600 [Cylindrobasidium torrendii FP15055 ss-10]
g1701	108692	110401	0.78	-		PBK58817.1	41.4	505	258	11	1	482	1	490	1.3e-53	220.7	hypothetical protein ARMSODRAFT_967407 [Armillaria solidipes]
g1702	110829	113977	0.17	+		KIY70016.1	72.8	657	150	9	227	869	1	642	1.2e-232	816.2	NOL1/NOP2/sun family putative RNA met [Cylindrobasidium torrendii FP15055 ss-10]
g1703	114186	114574	0.22	-		TFK42679.1	72.2	97	27	0	1	97	133	229	6.7e-31	142.9	actin cortical patch SUR7/pH-response regulator pali [Crucibulum laeve]
g1704	206	5493	0.12	-		RDB27640.1	30.8	1632	1021	33	91	1703	931	2473	4.4e-210	742.3	ATP-dependent DNA helicase tlh1 [Hypsizygus marmoreus]
g1705	23	443	0.39	+		XP_009553168.1	67	103	34	0	1	103	202	304	3.9e-32	147.1	Esterase/lipase/thioesterase [Heterobasidion irregulare TC 32-1]
g1706	1861	3071	0.2	+		KIY67047.1	59.6	319	119	2	9	325	10	320	8e-108	400.2	Metallo-hydrolase/oxidoreductase [Cylindrobasidium torrendii FP15055 ss-10]
g1707	4307	4775	0.75	-		KIY71439.1	64.9	131	46	0	9	139	6	136	1.3e-46	195.7	Rhodanese-like protein [Cylindrobasidium torrendii FP15055 ss-10]
g1708	5068	6678	0.43	+		XP_007316512.1	72.9	343	86	4	146	486	68	405	8.3e-146	526.9	hypothetical protein SERLADRAFT_463302 [Serpula lacrymans var. lacrymans S7.9]
g1709	9937	10696	0.73	+
g1710	11372	13155	0.07	+		SJK98228.1	57.1	273	114	2	183	454	117	387	5.1e-81	311.6	uncharacterized protein ARMOST_01489 [Armillaria ostoyae]
g1711	14375	15872	0.05	-		XP_009553168.1	58.1	301	108	2	41	341	2	284	4.4e-95	358.2	Esterase/lipase/thioesterase [Heterobasidion irregulare TC 32-1]
g1712	16846	18816	0.21	-		KIY68108.1	39.1	179	106	3	1	179	1	176	1.2e-20	111.3	hypothetical protein CYLTODRAFT_453808 [Cylindrobasidium torrendii FP15055 ss-10]
g1713	19333	20673	0.31	+		PBK99868.1	33.4	308	175	10	28	329	31	314	1.1e-32	150.6	hypothetical protein ARMGADRAFT_1008351 [Armillaria gallica]
g1714	20679	23702	0.01	-		ADX07310.1	30.5	908	562	16	21	890	1284	2160	4.3e-87	332.8	putative beta-glucosidase [Flammulina velutipes]
g1715	24486	27305	0.1	-		KIY72462.1	29.5	970	564	30	9	877	19	969	1.4e-82	317.8	hypothetical protein CYLTODRAFT_417860 [Cylindrobasidium torrendii FP15055 ss-10]
g1716	27518	30494	0.06	+		PPR00161.1	26.1	889	501	22	11	807	44	868	2.1e-67	267.3	hypothetical protein CVT26_008880 [Gymnopilus dilepis]
g1717	31601	35191	0.27	+		KIY67044.1	67.1	1147	311	13	5	1126	42	1147	0	1440.6	hypothetical protein CYLTODRAFT_490952 [Cylindrobasidium torrendii FP15055 ss-10]
g1718	35689	38390	0.04	-		PPR00161.1	29.3	735	378	24	11	612	44	769	6.7e-61	245.4	hypothetical protein CVT26_008880 [Gymnopilus dilepis]
g1719	38720	41817	0.2	-		PPQ75408.1	39	831	421	24	4	802	28	804	2.1e-131	479.9	hypothetical protein CVT26_015392 [Gymnopilus dilepis]
g1720	43434	45634	0.17	+		ADX07310.1	36.3	651	346	15	70	699	1558	2160	3.3e-90	342.8	putative beta-glucosidase [Flammulina velutipes]
g1721	45640	46753	0.51	-		PBK99868.1	32.1	349	195	12	1	342	1	314	1.9e-30	143.3	hypothetical protein ARMGADRAFT_1008351 [Armillaria gallica]
g1722	47425	47741	0.54	+
g1723	47985	48488	0.71	+
g1724	49405	50370	0.9	+		KIY71941.1	82.6	201	35	0	50	250	1	201	4.2e-93	350.9	benzoquinone reductase [Cylindrobasidium torrendii FP15055 ss-10]
g1725	50831	53083	0.85	-		KIP05681.1	50.6	532	247	5	21	542	17	542	3.9e-147	531.6	hypothetical protein PHLGIDRAFT_119585 [Phlebiopsis gigantea 11061_1 CR5-6]
g1726	54404	61655	0.23	+		PBK90037.1	87.7	2154	252	8	1	2147	1	2149	0	3670.2	Sec63-domain-containing protein [Armillaria gallica]
g1727	62199	62837	0.76	-		PBK63839.1	64.7	204	70	1	9	210	16	219	1.5e-67	265.8	hypothetical protein ARMSODRAFT_996970 [Armillaria solidipes]
g1728	63887	64471	1	+
g1729	64990	66466	0.26	+		PBK63837.1	59.1	342	131	5	19	360	39	371	3e-108	401.7	glycoside hydrolase family 76 protein [Armillaria solidipes]
g1730	66992	68397	0.23	+		PBK63837.1	72.7	341	92	1	8	348	32	371	4.7e-143	517.3	glycoside hydrolase family 76 protein [Armillaria solidipes]
g1731	68550	69368	0.84	-		KIY71941.1	74.6	201	51	0	1	201	1	201	1.6e-82	315.5	benzoquinone reductase [Cylindrobasidium torrendii FP15055 ss-10]
g1732	71837	73718	0.29	+		KTB45202.1	74.9	450	108	4	135	583	58	503	1.9e-197	698.7	hypothetical protein WG66_2218 [Moniliophthora roreri]
g1733	74019	74408	0.3	-		TFK92155.1	42.6	115	49	2	1	115	5	102	4e-15	90.9	hypothetical protein K466DRAFT_513946 [Polyporus arcularius HHB13444]
g1734	74636	75481	0.44	+
g1735	75781	82053	0.02	+		KIY73930.1	32.8	598	328	14	16	582	23	577	1.1e-77	302.4	SET domain-containing protein [Cylindrobasidium torrendii FP15055 ss-10]
g1736	82496	83366	0.12	-
g1737	313	579	0.53	+
g1738	91	300	0.36	-		PBK69906.1	78	41	9	0	1	41	431	471	2.8e-07	63.9	glycoside hydrolase family 79 protein [Armillaria solidipes]
g1739	1	7750	0.24	+		RDB22792.1	54.2	1489	627	9	35	1470	1452	2938	0	1616.7	hypothetical protein Hypma_010275 [Hypsizygus marmoreus]
g1740	217	594	0.39	+
g1741	601	2375	0.24	-		KIY63260.1	35.6	188	113	4	258	440	106	290	1.9e-19	107.1	hypothetical protein CYLTODRAFT_458265 [Cylindrobasidium torrendii FP15055 ss-10]
g1742	2599	3250	0.28	+		PBK63851.1	36.3	193	118	4	4	193	3	193	9.7e-16	93.6	hypothetical protein ARMSODRAFT_1023752 [Armillaria solidipes]
g1743	3970	5048	0.25	-		SJL06111.1	63.4	325	93	8	3	316	5	314	5.7e-71	277.7	uncharacterized protein ARMOST_09447 [Armillaria ostoyae]
g1744	5387	5874	0.93	+		PBL00655.1	65.5	110	38	0	1	110	1	110	8.7e-30	139.4	tubulin binding cofactor A [Armillaria gallica]
g1745	6116	6778	0.51	-		KNZ80576.1	73.9	161	40	1	5	163	3	163	2.2e-56	228.4	hypothetical protein J132_04818, partial [Termitomyces sp. J132]
g1746	6949	8747	0.37	+		PBL00653.1	68.1	545	140	6	4	517	26	567	7e-207	729.9	P-loop containing nucleoside triphosphate hydrolase protein [Armillaria gallica]
g1747	9384	11865	0.85	-		KIY69356.1	54.9	814	295	23	6	790	4	774	1.9e-195	692.6	hypothetical protein CYLTODRAFT_442703 [Cylindrobasidium torrendii FP15055 ss-10]
g1748	12361	20599	0.09	+		PBL00664.1	61.2	2004	740	10	1	1989	1	1981	0	2460.6	hypothetical protein ARMGADRAFT_982963 [Armillaria gallica]
g1749	20790	22683	0.15	-		SJL06115.1	31.4	407	157	14	13	414	3	292	8.7e-40	174.9	uncharacterized protein ARMOST_09451 [Armillaria ostoyae]
g1750	22902	25773	0.28	-		SJL06118.1	77.7	613	128	3	2	606	4	615	1.5e-275	958.7	uncharacterized protein ARMOST_09454 [Armillaria ostoyae]
g1751	25982	27549	0.18	+		KIY69377.1	43.3	462	218	16	21	471	1	429	3.8e-63	252.3	hypothetical protein CYLTODRAFT_372820 [Cylindrobasidium torrendii FP15055 ss-10]
g1752	28509	29752	0.92	-		PBK76866.1	93.1	364	22	2	1	361	1	364	3e-193	684.1	kinase-like protein [Armillaria solidipes]
g1753	31703	34792	0.57	+		PBL00647.1	83.6	872	127	7	1	868	1	860	0	1449.5	chitin synthase [Armillaria gallica]
g1754	627	2666	0.09	-		KIY65256.1	78.7	286	59	1	30	315	20	303	7.5e-117	430.3	hypothetical protein CYLTODRAFT_68340 [Cylindrobasidium torrendii FP15055 ss-10]
g1755	2890	4986	0.33	-		KIY68402.1	23	300	192	10	3	284	2	280	1.2e-05	61.2	hypothetical protein CYLTODRAFT_421624 [Cylindrobasidium torrendii FP15055 ss-10]
g1756	5340	6873	0.04	+
g1757	7474	7722	0.24	-
g1758	8940	10454	0.22	+		AHD24915.1	88.7	106	9	3	184	286	144	249	1.4e-42	183.3	putative laccase 2 [Flammulina velutipes]
g1759	11053	12120	0.28	-
g1760	361	911	0.47	+
g1761	917	2316	0.73	-
g1762	2741	3364	0.53	+
g1763	1536	2484	0.21	-
g1764	2625	3946	0.37	+		RDB20053.1	40	310	174	8	23	328	74	375	2.6e-54	222.6	hypothetical protein Hypma_013004 [Hypsizygus marmoreus]
g1765	92	377	0.52	+		KIY66425.1	48.5	99	45	4	1	95	233	329	0.00024	54.7	hypothetical protein CYLTODRAFT_398793 [Cylindrobasidium torrendii FP15055 ss-10]
g1766	248	685	0.32	+
g1767	36	2104	0.06	+
g1768	107	3998	0.28	-		KIY68877.1	61.7	1058	342	22	113	1147	2	1019	8.7e-295	1023.1	TBC-domain-containing protein [Cylindrobasidium torrendii FP15055 ss-10]
g1769	4461	8260	0.03	+		AHD24916.1	94.9	670	31	1	1	667	1	670	0	1312.7	putative laccase 3 [Flammulina velutipes]
g1770	10147	10983	0.18	-		KIY68887.1	75.9	232	56	0	12	243	29	260	1.5e-98	369	NAD-P-binding protein [Cylindrobasidium torrendii FP15055 ss-10]
g1771	11286	12914	0.62	-		SJK97227.1	80.6	444	86	0	1	444	1	444	2.4e-208	734.6	related to SOF1-involved in 18S pre-rRNA production [Armillaria ostoyae]
g1772	13006	14812	0.62	+
g1773	15021	16995	0.1	-		KIY68882.1	42.7	637	315	15	10	607	15	640	5.9e-125	458	hypothetical protein CYLTODRAFT_489397 [Cylindrobasidium torrendii FP15055 ss-10]
g1774	18709	20233	0.24	-		PBK99597.1	62.5	421	139	6	2	408	3	418	1.4e-141	512.7	hypothetical protein ARMGADRAFT_1051596 [Armillaria gallica]
g1775	20298	24190	0.06	+		PBK76982.1	69.4	435	114	5	493	909	1	434	6.5e-160	574.7	hypothetical protein ARMSODRAFT_875407 [Armillaria solidipes]
g1776	25059	26568	0.88	+		SJL03939.1	76.7	451	101	1	1	447	1	451	4.3e-189	670.6	related to Probable gamma-glutamyl phosphate reductase [Armillaria ostoyae]
g1777	26750	28319	0.69	-		KIY68904.1	60	448	159	3	5	448	9	440	8.8e-142	513.5	hypothetical protein CYLTODRAFT_394741 [Cylindrobasidium torrendii FP15055 ss-10]
g1778	28430	29917	0.94	-		PBK99609.1	65.1	407	136	4	4	409	8	409	4.7e-102	381.3	hypothetical protein ARMGADRAFT_985370 [Armillaria gallica]
g1779	30041	32976	0.45	+		SJK97145.1	70.3	435	123	2	1	429	1	435	5.2e-175	624.8	uncharacterized protein ARMOST_00396 [Armillaria ostoyae]
g1780	33265	35567	0.48	+		KIY71084.1	30.2	245	150	7	405	631	39	280	4.3e-17	99.8	hypothetical protein CYLTODRAFT_419223 [Cylindrobasidium torrendii FP15055 ss-10]
g1781	36875	38499	0.31	-		KZP29356.1	27.3	417	275	8	18	431	7	398	2.1e-30	143.7	hypothetical protein FIBSPDRAFT_1039009 [Fibularhizoctonia sp. CBS 109695]
g1782	39520	40601	0.34	-		SJL02095.1	34.9	252	147	3	12	260	156	393	5.7e-31	144.8	uncharacterized protein ARMOST_05419 [Armillaria ostoyae]
g1783	41020	41523	0.59	-		PBK64462.1	74.8	119	27	3	1	117	1	118	4.2e-35	157.1	hypothetical protein ARMSODRAFT_941051 [Armillaria solidipes]
g1784	45101	47174	0.16	-		PBK97430.1	50.5	487	218	6	32	497	29	513	2.8e-136	495.4	cytochrome P450 [Armillaria gallica]
g1785	47613	49819	0.35	+		PBK99615.1	64.1	599	208	1	6	597	14	612	2e-234	821.6	glycoside hydrolase family 47 protein [Armillaria gallica]
g1786	50224	52226	0.35	+		PBK72506.1	75	532	133	0	4	535	5	536	3.1e-242	847.4	glycerol kinase [Armillaria solidipes]
g1787	56570	56845	0.15	-		TEB30894.1	32.6	89	48	2	2	90	506	582	0.0003	54.3	FAD-binding domain-containing protein [Coprinellus micaceus]
g1788	57391	58197	0.75	+		KIM72726.1	28.3	226	144	8	6	219	7	226	9.9e-06	60.5	hypothetical protein PILCRDRAFT_93343 [Piloderma croceum F 1598]
g1789	58418	60745	0.19	-		KIY62073.1	66.1	709	210	10	1	707	1	681	6.8e-266	926.4	hypothetical protein CYLTODRAFT_384089 [Cylindrobasidium torrendii FP15055 ss-10]
g1790	60921	63412	0.53	-		KIY66865.1	86.9	750	98	0	1	750	1	750	0	1345.1	saccharopine dehydrogenase [Cylindrobasidium torrendii FP15055 ss-10]
g1791	65041	68512	0.02	-		KIY66864.1	75.7	477	113	1	5	478	3	479	1.2e-206	729.6	hypothetical protein CYLTODRAFT_398145 [Cylindrobasidium torrendii FP15055 ss-10]
g1792	69624	73331	0.02	+		OCH90956.1	31.6	193	123	5	94	281	430	618	1.1e-25	128.3	hypothetical protein OBBRIDRAFT_887305 [Obba rivulosa]
g1793	73527	73814	0.56	-		RDB23442.1	84.3	89	14	0	1	89	59	147	3.2e-33	150.6	Homocitrate dehydratase, mitochondrial [Hypsizygus marmoreus]
g1794	74333	76313	0.62	+		SJL03947.1	96.9	509	16	0	22	530	71	579	1.4e-276	961.4	probable H+-transporting ATP synthase alpha chain, mitochondrial [Armillaria ostoyae]
g1795	76590	78169	0.37	+		KIY68913.1	61.9	425	141	3	34	457	36	440	3.2e-155	558.1	glycoside hydrolase family 71 protein [Cylindrobasidium torrendii FP15055 ss-10]
g1796	78987	80042	0.98	+		AVP77533.1	46.1	386	136	9	1	326	1	374	2.1e-71	279.3	primordium development defect 1 [Flammulina velutipes]
g1797	81115	83086	0.32	-		KIY65089.1	43.2	338	176	7	79	405	4	336	1.6e-68	270	hypothetical protein CYLTODRAFT_379994 [Cylindrobasidium torrendii FP15055 ss-10]
g1798	83604	85869	0.08	+		KIY68722.1	31.2	260	157	8	7	246	38	295	4.6e-16	96.3	hypothetical protein CYLTODRAFT_489543 [Cylindrobasidium torrendii FP15055 ss-10]
g1799	86264	87679	0.07	-		RDB23651.1	75.4	338	79	1	13	346	8	345	5.4e-139	503.8	Zinc-regulated transporter 1 [Hypsizygus marmoreus]
g1800	88722	90094	0.08	-		PBK99635.1	77	361	72	3	6	366	7	356	4.6e-149	537.3	Brix-domain-containing protein [Armillaria gallica]
g1801	90353	91315	0.91	-		KIY60777.1	47.2	197	100	1	56	248	9	205	1.4e-45	193.4	hypothetical protein CYLTODRAFT_495525 [Cylindrobasidium torrendii FP15055 ss-10]
g1802	95737	97742	0.64	-		KIY66861.1	81	437	66	1	1	437	1	420	2.2e-204	721.5	hypothetical protein CYLTODRAFT_398134 [Cylindrobasidium torrendii FP15055 ss-10]
g1803	97945	98730	0.87	+		PBK72522.1	84	50	8	0	2	51	8	57	2.1e-13	85.5	hypothetical protein ARMSODRAFT_910241 [Armillaria solidipes]
g1804	99377	100466	0.35	+		XP_007865531.1	41.8	273	139	6	14	269	18	287	3.1e-49	205.3	pseudouridine synthase [Gloeophyllum trabeum ATCC 11539]
g1805	100547	112749	0.01	-		PBK71756.1	67.9	982	297	9	1189	2163	6	976	0	1309.3	TPR-like protein [Armillaria solidipes]
g1806	115282	117157	0.38	-		PBK72444.1	46.9	672	228	32	1	601	1	614	6.3e-119	438	hypothetical protein ARMSODRAFT_1016407 [Armillaria solidipes]
g1807	127474	131284	0.37	+		KIJ63459.1	43.4	569	271	12	623	1177	704	1235	1.2e-113	421.4	hypothetical protein HYDPIDRAFT_112868 [Hydnomerulius pinastri MD-312]
g1808	131598	135121	0.32	-		SJL09399.1	30.6	1250	547	46	6	971	38	1250	4.1e-70	276.6	uncharacterized protein ARMOST_12777 [Armillaria ostoyae]
g1809	135277	137387	0.72	+		RDB15783.1	74	457	112	3	1	451	1	456	4.4e-147	531.2	putative J domain-containing protein C4H3.01 [Hypsizygus marmoreus]
g1810	137641	141111	0.06	-		KIY68870.1	70.3	256	76	0	133	388	171	426	2.3e-103	386.7	CRAL/TRIO domain-containing protein [Cylindrobasidium torrendii FP15055 ss-10]
g1811	141286	142788	0.7	+		KIY68869.1	68.9	486	130	8	8	482	1	476	2.6e-168	601.7	TPT-domain-containing protein [Cylindrobasidium torrendii FP15055 ss-10]
g1812	144660	149035	0.05	-		KIL64492.1	34.8	463	237	18	6	431	6	440	6e-53	219.5	hypothetical protein M378DRAFT_163271 [Amanita muscaria Koide BX008]
g1813	149401	153052	0.07	+		KIY71922.1	66.8	997	262	26	1	964	1	961	0	1221.1	hypothetical protein CYLTODRAFT_418465 [Cylindrobasidium torrendii FP15055 ss-10]
g1814	153378	156440	0.17	-		SJL03921.1	71.7	473	124	4	216	683	236	703	5.1e-198	701	uncharacterized protein ARMOST_07278 [Armillaria ostoyae]
g1815	156828	158947	0.35	+		OCH91485.1	73.6	462	122	0	48	509	13	474	3e-194	688	PLP-dependent transferase [Obba rivulosa]
g1816	159133	159972	0.73	+		PBK72480.1	67.8	87	21	4	116	196	126	211	1.7e-14	89.7	hypothetical protein ARMSODRAFT_954183 [Armillaria solidipes]
g1817	161017	162341	0.1	+		XP_001874598.1	89.6	48	5	0	48	95	10	57	6.2e-14	88.2	predicted protein [Laccaria bicolor S238N-H82]
g1818	162556	163146	0.82	-		ADX07302.1	49.7	157	70	6	2	156	509	658	1.5e-21	112.8	putative peroxiredoxin Q [Flammulina velutipes]
g1819	163267	169235	0.44	+		KIY68863.1	78.3	1666	277	11	25	1628	79	1722	0	2149.4	hypothetical protein CYLTODRAFT_350626 [Cylindrobasidium torrendii FP15055 ss-10]
g1820	169311	170041	0.22	-
g1821	171129	171737	0.27	+
g1822	172445	173949	0.08	-
g1823	174098	175928	0.63	+		KIY68040.1	63.5	603	198	5	7	590	3	602	3.9e-222	780.8	glycoside hydrolase family 47 protein [Cylindrobasidium torrendii FP15055 ss-10]
g1824	1	1270	0.91	+		PBK84675.1	42.6	340	158	3	6	341	199	505	2.4e-60	242.7	hypothetical protein ARMGADRAFT_600538 [Armillaria gallica]
g1825	1	2968	0.01	+		KDR80707.1	99.3	152	1	0	1	152	8	159	1.5e-78	303.5	hypothetical protein GALMADRAFT_241118 [Galerina marginata CBS 339.88]
g1826	4294	6201	0.66	+		POS74435.1	71.3	463	133	0	13	475	36	498	6.8e-191	676.8	carboxylic acid transporter [Diaporthe helianthi]
g1827	9535	16770	0.2	+		PBK99742.1	68.7	2171	608	14	87	2247	20	2129	0	2621.7	hypothetical protein ARMGADRAFT_985648 [Armillaria gallica]
g1828	17242	18727	0.4	+		KIY70593.1	68.6	334	95	3	5	333	9	337	5.3e-121	444.1	hypothetical protein CYLTODRAFT_370853 [Cylindrobasidium torrendii FP15055 ss-10]
g1829	19588	20364	0.87	+		SJL04048.1	57	263	104	3	1	258	1	259	7.4e-77	297	uncharacterized protein ARMOST_07406 [Armillaria ostoyae]
g1830	20653	22351	0.37	-		KIY70591.1	55.7	510	205	3	1	505	1	494	3.2e-172	614.8	hypothetical protein CYLTODRAFT_451621 [Cylindrobasidium torrendii FP15055 ss-10]
g1831	23822	25316	0.87	+		SJL04051.1	74.9	370	92	1	20	389	19	387	2.2e-157	565.1	related to CYB2-lactate dehydrogenase cytochrome b2 [Armillaria ostoyae]
g1832	25414	26501	0.35	-		KIY70589.1	70.6	326	96	0	1	326	1	326	7.4e-130	473.4	Pantoate-beta-alanine ligase [Cylindrobasidium torrendii FP15055 ss-10]
g1833	28739	31655	0.9	+		KIY70533.1	70.2	496	132	7	1	490	398	883	3.6e-184	655.2	hypothetical protein CYLTODRAFT_408767 [Cylindrobasidium torrendii FP15055 ss-10]
g1834	32512	34514	0.02	-		KIY70542.1	75	168	39	2	201	365	1	168	1.5e-65	260.4	hypothetical protein CYLTODRAFT_347506 [Cylindrobasidium torrendii FP15055 ss-10]
g1835	2	558	0.55	-
g1836	1048	1574	0.5	+
g1837	1617	2150	0.72	-		PBK63464.1	66.9	148	48	1	2	149	3	149	6.7e-45	190.3	hypothetical protein ARMSODRAFT_963066 [Armillaria solidipes]
g1838	2288	2680	0.75	+		KIY70386.1	57.7	123	41	5	7	129	5	116	2.8e-24	121.3	hypothetical protein CYLTODRAFT_187773 [Cylindrobasidium torrendii FP15055 ss-10]
g1839	2861	3921	0.96	-		KIY71212.1	79.3	300	60	2	2	300	3	301	5.9e-134	486.9	SAICAR synthetase [Cylindrobasidium torrendii FP15055 ss-10]
g1840	3994	5348	0.37	+		PBL02642.1	66.1	304	94	3	14	315	12	308	6.7e-107	397.1	hypothetical protein ARMGADRAFT_1042337 [Armillaria gallica]
g1841	2	6256	0.04	-		KIY71085.1	57.4	188	75	3	1178	1361	6	192	1.2e-48	205.7	S-adenosyl-L-methionine-dependent methyltransferase [Cylindrobasidium torrendii FP15055 ss-10]
g1842	1	6083	0.01	-		PBK59480.1	42.9	326	178	6	313	634	19	340	6.3e-61	245.4	hypothetical protein ARMSODRAFT_899294 [Armillaria solidipes]
g1843	233	721	0.16	+
g1844	163	2483	0.06	-		ADX07331.1	42.3	343	141	4	180	469	1	339	6.8e-52	214.9	putative hydrophobin [Flammulina velutipes]
g1845	3383	5433	0.22	-		PBK66023.1	33.7	374	210	12	154	514	428	776	2.2e-40	177.2	hypothetical protein ARMSODRAFT_960472 [Armillaria solidipes]
g1846	6445	7039	0.64	-		AOV80984.1	95.1	122	6	0	1	122	1	122	1.1e-41	179.1	hydrophobin [Flammulina velutipes]
g1847	7992	8895	0.19	+		PBK93217.1	43.7	183	89	6	6	176	86	266	4.7e-23	118.2	hypothetical protein ARMGADRAFT_1063318 [Armillaria gallica]
g1848	9353	10163	0.2	-		PSS26861.1	38.5	96	50	3	121	216	187	273	0.0002	56.2	Serine/threonine-protein kinase [Actinidia chinensis var. chinensis]
g1849	10533	12070	0.26	+		RXW23104.1	39	420	192	15	8	388	7	401	1.8e-61	246.5	hypothetical protein EST38_g2731 [Psathyrella aberdarensis]
g1850	12466	14452	0.95	-		PBK65655.1	32.1	521	293	17	147	641	445	930	3.1e-47	199.9	hypothetical protein ARMSODRAFT_1087282 [Armillaria solidipes]
g1851	15259	17339	0.13	+		KIY72567.1	76.3	565	119	7	21	579	20	575	2.6e-239	837.8	Metallo-dependent phosphatase [Cylindrobasidium torrendii FP15055 ss-10]
g1852	17507	20061	0.04	+		PVF91302.1	25.7	366	235	11	212	550	14	369	2.2e-16	97.4	kinase-like protein [Serendipita vermifera 'subsp. bescii']
g1853	20095	20474	0.69	-		PBK78800.1	57.7	71	29	1	9	79	204	273	9.1e-13	82.8	hypothetical protein ARMSODRAFT_968850 [Armillaria solidipes]
g1854	719	2102	0.62	+		KIY71455.1	34.1	287	173	6	9	294	8	279	9e-33	151.4	hypothetical protein CYLTODRAFT_123311 [Cylindrobasidium torrendii FP15055 ss-10]
g1855	1	2528	0.05	+		PBK66373.1	33.2	349	120	11	103	378	573	881	1.4e-10	78.2	hypothetical protein ARMSODRAFT_363941 [Armillaria solidipes]
g1856	2	164	0.52	-
g1857	1016	1871	0.43	-
g1858	2630	3527	0.77	-		PCH43650.1	32.7	156	90	5	4	148	12	163	9.8e-06	60.8	hypothetical protein WOLCODRAFT_18489 [Wolfiporia cocos MD-104 SS10]
g1859	1	567	0.13	-
g1860	1007	1875	0.21	+		SJL00832.1	33	100	60	3	36	135	46	138	4.2e-06	62	uncharacterized protein ARMOST_04146 [Armillaria ostoyae]
g1861	777	1649	0.93	-
g1862	32	1624	0.73	+		PIL24560.1	49	510	220	7	23	529	73	545	1e-128	470.3	hypothetical protein GSI_12444 [Ganoderma sinense ZZ0214-1]
g1863	1857	3644	0.82	+		OBZ69861.1	53.9	358	164	1	230	586	85	442	4.8e-111	411.8	Transposon Tf2-8 polyprotein [Grifola frondosa]
g1864	599	969	0.31	+
g1865	1	463	0.55	+		RDB18819.1	41.7	120	55	2	8	112	502	621	9.3e-22	112.8	hypothetical protein Hypma_014528 [Hypsizygus marmoreus]
g1866	880	1237	0.76	+
g1867	453	1297	0.04	+		KIY63498.1	32.6	141	82	5	16	156	359	486	3.4e-09	71.6	hypothetical protein CYLTODRAFT_414000 [Cylindrobasidium torrendii FP15055 ss-10]
g1868	2	1026	0.49	-		KIY65586.1	30.7	306	172	5	9	274	111	416	3.8e-31	145.2	hypothetical protein CYLTODRAFT_445259 [Cylindrobasidium torrendii FP15055 ss-10]
g1869	2	583	0.8	-		XP_007299774.1	70.6	160	46	1	1	159	161	320	9.6e-59	236.1	aromatic compound dioxygenase [Stereum hirsutum FP-91666 SS1]
g1870	355	874	0.69	-
g1871	77	1889	0.25	+		ADX07310.1	41.4	510	272	11	2	501	1614	2106	2.5e-88	336.3	putative beta-glucosidase [Flammulina velutipes]
g1872	1949	3444	0.13	-		PBK99868.1	35	226	117	7	166	382	59	263	1.6e-25	127.1	hypothetical protein ARMGADRAFT_1008351 [Armillaria gallica]
g1873	4704	5786	0.27	-		KIY72540.1	45.5	77	37	3	228	300	51	126	1.6e-09	73.6	hypothetical protein CYLTODRAFT_449706 [Cylindrobasidium torrendii FP15055 ss-10]
g1874	450	3392	0.29	+		KIY69421.1	67.6	404	107	5	295	698	2	381	1e-152	550.4	glycoside hydrolase family 105 protein [Cylindrobasidium torrendii FP15055 ss-10]
g1875	3494	5906	0.65	-		SJL09229.1	69.2	597	172	6	1	590	1	592	7.6e-234	819.7	related to PTR2-Di-and tripeptide permease [Armillaria ostoyae]
g1876	6522	8432	0.12	-		SJL09231.1	29.1	474	286	10	9	458	13	460	4.9e-31	145.6	uncharacterized protein ARMOST_12607 [Armillaria ostoyae]
g1877	8825	10145	0.34	-		KIY69419.1	85.3	407	51	2	1	406	1	399	5.2e-194	686.8	hypothetical protein CYLTODRAFT_393741 [Cylindrobasidium torrendii FP15055 ss-10]
g1878	11040	13602	0.56	+		KZV80694.1	76.1	620	145	1	2	618	15	634	2.9e-276	960.7	PTR2-domain-containing protein [Exidia glandulosa HHB12029]
g1879	14061	15541	0.5	-		KIY72015.1	81.9	298	53	1	1	298	1	297	4.1e-135	490.7	ribose-5-phosphate isomerase [Cylindrobasidium torrendii FP15055 ss-10]
g1880	16010	23657	0.06	+		KIY64149.1	79.1	1594	311	9	1	1586	4	1583	0	2476.8	Pentafunctional AroM protein [Cylindrobasidium torrendii FP15055 ss-10]
g1881	24014	26161	0.41	+		KIY69431.1	84.6	557	74	4	1	548	1	554	2e-257	897.9	sugar transporter [Cylindrobasidium torrendii FP15055 ss-10]
g1882	26888	31617	0.16	+		PBK71320.1	77.3	604	120	5	716	1303	1	603	1.5e-258	902.9	BING4CT-domain-containing protein [Armillaria solidipes]
g1883	31910	33822	0.55	-		KIY61996.1	61.3	581	202	9	5	567	7	582	6.9e-184	653.7	hypothetical protein CYLTODRAFT_494944 [Cylindrobasidium torrendii FP15055 ss-10]
g1884	33953	35493	0.07	-		PBK71457.1	72.2	407	113	0	10	416	6	412	9.6e-183	649.4	hypothetical protein ARMSODRAFT_1017354 [Armillaria solidipes]
g1885	36026	37626	0.2	+		SJL09245.1	65.4	407	128	6	33	435	6	403	9.1e-144	520	related to lactonohydrolase [Armillaria ostoyae]
g1886	785	1268	0.61	+		XP_001873407.1	43.9	82	27	1	5	86	3	65	7.9e-07	62.8	predicted protein [Laccaria bicolor S238N-H82]
g1887	1464	3265	0.53	-		PBK64444.1	32.9	307	174	8	129	417	45	337	8.5e-28	134.8	hypothetical protein ARMSODRAFT_961956 [Armillaria solidipes]
g1888	3663	4266	0.75	+		KIK32375.1	31.9	163	96	8	9	159	4	163	0.00035	55.1	hypothetical protein CY34DRAFT_19091 [Suillus luteus UH-Slu-Lm8-n1]
g1889	4867	7988	0.15	-		SJL00658.1	43.2	403	191	9	57	426	52	449	1e-70	278.5	uncharacterized protein ARMOST_03971 [Armillaria ostoyae]
g1890	10195	12201	0.71	+		KIK51147.1	61.6	492	186	3	40	529	20	510	4e-181	644.4	hypothetical protein GYMLUDRAFT_252319 [Gymnopus luxurians FD-317 M1]
g1891	13137	14810	0.48	+		KIY62756.1	61.8	536	195	3	1	526	1	536	1.1e-188	669.5	voltage-gated potassium channel [Cylindrobasidium torrendii FP15055 ss-10]
g1892	15317	16978	0.21	+		RDB29383.1	31.4	296	144	9	187	480	107	345	1.6e-27	134	Peptidyl-Lys metalloendopeptidase [Hypsizygus marmoreus]
g1893	17305	17688	0.32	-		KIY67418.1	62.3	130	45	1	2	127	494	623	2.3e-39	171.4	hypothetical protein CYLTODRAFT_376076 [Cylindrobasidium torrendii FP15055 ss-10]
g1894	17741	19333	0.39	-		KIY67418.1	67.1	474	138	5	8	466	8	478	2.1e-173	618.6	hypothetical protein CYLTODRAFT_376076 [Cylindrobasidium torrendii FP15055 ss-10]
g1895	19878	21003	0.82	+		KIY62753.1	67.5	292	89	2	1	287	1	291	5.3e-108	400.6	zincin [Cylindrobasidium torrendii FP15055 ss-10]
g1896	21131	24733	0.02	-		TFK98215.1	52.8	691	266	10	88	747	7	668	2.1e-201	712.2	glycoside hydrolase superfamily [Pterula gracilis]
g1897	25606	26170	0.74	+		PBL03065.1	46.4	151	76	3	3	149	4	153	1.4e-27	132.5	hypothetical protein ARMGADRAFT_1191 [Armillaria gallica]
g1898	27756	29716	0.73	-		KIY68950.1	85.2	466	69	0	5	470	1	466	5.2e-228	800	putative MFS sugar transporter, partial [Cylindrobasidium torrendii FP15055 ss-10]
g1899	31043	33157	0.12	+		PBL04338.1	23.3	579	256	8	204	650	219	741	8.9e-26	128.6	hypothetical protein ARMGADRAFT_1022773 [Armillaria gallica]
g1900	33281	35335	0.34	-		KIY64550.1	86.4	346	47	0	1	346	1	346	7e-172	613.6	GroES-like protein [Cylindrobasidium torrendii FP15055 ss-10]
g1901	36466	37197	0.28	-
g1902	37453	38132	0.8	-		KIY74347.1	88.9	153	17	0	1	153	1	153	7.1e-75	289.7	mitochondrial import inner membrane translocase subunit [Cylindrobasidium torrendii FP15055 ss-10]
g1903	38317	40560	0.17	+		PBK73864.1	36.6	686	340	16	10	652	7	640	3.1e-111	412.5	hypothetical protein ARMSODRAFT_1081973 [Armillaria solidipes]
g1904	1	562	0.36	+		KIY69919.1	32.3	130	72	2	1	114	142	271	4.6e-11	77.4	hypothetical protein CYLTODRAFT_208875 [Cylindrobasidium torrendii FP15055 ss-10]
g1905	994	1302	0.22	-
g1906	2485	3729	0.83	+		KIY64976.1	31.6	294	177	8	5	281	12	298	5.3e-30	141.7	hypothetical protein CYLTODRAFT_412931 [Cylindrobasidium torrendii FP15055 ss-10]
g1907	4100	7402	0.03	-
g1908	8771	9058	0.81	-		KIY69868.1	44.3	61	34	0	34	94	177	237	2.1e-05	58.2	hypothetical protein CYLTODRAFT_420311 [Cylindrobasidium torrendii FP15055 ss-10]
g1909	9877	11595	0.96	+		KIY69486.1	53.8	251	114	2	31	280	16	265	3.2e-66	262.7	hypothetical protein CYLTODRAFT_442639 [Cylindrobasidium torrendii FP15055 ss-10]
g1910	11786	12788	0.22	-		KIM72289.1	44	252	141	0	24	275	9	260	1.4e-52	216.5	hypothetical protein PILCRDRAFT_742909 [Piloderma croceum F 1598]
g1911	13263	15477	0.29	-		KIY61377.1	63.2	266	93	2	148	411	1	263	1e-80	310.8	hypothetical protein CYLTODRAFT_333793, partial [Cylindrobasidium torrendii FP15055 ss-10]
g1912	15952	18226	0.21	+		KIY66560.1	75.1	539	128	1	5	537	17	555	2.1e-238	834.7	putative general amino acid permease [Cylindrobasidium torrendii FP15055 ss-10]
g1913	18542	20251	0.17	+		PBK60739.1	25.7	323	207	9	120	431	102	402	3.6e-11	79.7	hypothetical protein ARMSODRAFT_1066331 [Armillaria solidipes]
g1914	20985	22213	0.26	-		SJK98346.1	30.1	332	199	10	10	317	12	334	1e-25	127.5	uncharacterized protein ARMOST_01611 [Armillaria ostoyae]
g1915	2	134	0.54	-		KIY61681.1	57.8	45	18	1	1	44	102	146	8.4e-05	55.1	hypothetical protein CYLTODRAFT_362538 [Cylindrobasidium torrendii FP15055 ss-10]
g1916	647	3317	0.11	+		ESK94897.1	56.1	713	303	4	1	706	1	710	7.2e-215	756.9	abc transporter related protein [Moniliophthora roreri MCA 2997]
g1917	6109	9394	0.68	-		KIY65079.1	46.7	565	281	11	489	1037	13	573	8.6e-132	481.5	hypothetical protein CYLTODRAFT_75623 [Cylindrobasidium torrendii FP15055 ss-10]
g1918	9622	12842	0.59	+		PBK99220.1	79	858	144	6	24	866	1	837	0	1192.6	Adaptor protein complex AP-1 gamma subunit [Armillaria gallica]
g1919	1	1105	0.57	+
g1920	1693	2152	0.6	-
g1921	1	629	0.4	-		PBK84478.1	41	188	108	3	2	187	106	292	9.3e-29	136.7	cytochrome P450, partial [Armillaria gallica]
g1922	324	3714	0.58	-		KIY63769.1	53.5	973	383	12	118	1076	203	1120	1.8e-294	1021.9	hypothetical protein CYLTODRAFT_125515 [Cylindrobasidium torrendii FP15055 ss-10]
g1923	4651	6832	0.18	+		RDB23198.1	36.4	316	197	1	285	596	165	480	4.9e-63	252.3	hypothetical protein Hypma_009706 [Hypsizygus marmoreus]
g1924	6903	9042	0.28	+		RDB30890.1	30	290	180	8	258	536	242	519	2.3e-27	133.7	hypothetical protein Hypma_004895 [Hypsizygus marmoreus]
g1925	22	714	0.78	-		KIY66731.1	62.8	223	69	3	1	219	186	398	6e-78	300.4	glycosyltransferase family 8 protein [Cylindrobasidium torrendii FP15055 ss-10]
g1926	2	612	0.32	-		GAW04594.1	36.8	125	66	6	55	169	106	227	5.3e-08	67.8	hypothetical protein LENED_006399 [Lentinula edodes]
g1927	1462	2178	0.53	-		PIL25252.1	68.7	182	57	0	4	185	3	184	1.9e-66	261.9	hypothetical protein GSI_13141 [Ganoderma sinense ZZ0214-1]
g1928	4420	5922	0.56	+		PBK61519.1	27	382	251	8	4	373	19	384	1e-29	141.4	hypothetical protein ARMSODRAFT_1064734 [Armillaria solidipes]
g1929	700	2214	0.16	+		PBK97803.1	50.8	455	158	10	6	438	3	413	1.4e-62	250.4	Bud-site selection protein [Armillaria gallica]
g1930	2279	4409	0.71	-		PBK78535.1	46.7	642	316	11	8	639	16	641	2.3e-167	599	hypothetical protein ARMSODRAFT_873426 [Armillaria solidipes]
g1931	5493	6128	0.45	-
g1932	6195	9412	0.27	+		KIY64980.1	86.3	924	122	3	1	920	1	923	1.1e-228	803.1	hypothetical protein CYLTODRAFT_492693 [Cylindrobasidium torrendii FP15055 ss-10]
g1933	10307	12141	0.13	+
g1934	13064	13905	0.25	+		KIY70373.1	55.8	224	89	4	6	220	3	225	5.4e-61	244.2	ribosomal protein S5 domain 2-like protein [Cylindrobasidium torrendii FP15055 ss-10]
g1935	14526	16558	0.44	-		PBK74646.1	71.6	606	136	11	2	577	4	603	7.7e-173	617.1	hypothetical protein ARMSODRAFT_950656 [Armillaria solidipes]
g1936	17671	18881	0.72	+		PBK74796.1	88.2	322	38	0	10	331	2	323	2.1e-71	279.3	rab geranylgeranyltransferase [Armillaria solidipes]
g1937	19099	19609	0.47	-
g1938	20285	21229	0.62	+		KIY64979.1	86.3	95	13	0	1	95	1	95	2.4e-35	159.1	hypothetical protein CYLTODRAFT_380157 [Cylindrobasidium torrendii FP15055 ss-10]
g1939	24775	31369	0.04	+		KIM89334.1	62.3	1714	539	11	5	1620	3	1707	0	2017.7	hypothetical protein PILCRDRAFT_813268 [Piloderma croceum F 1598]
g1940	32794	35308	0.57	+		PBK74746.1	62.1	817	266	11	1	789	1	801	7.2e-240	840.1	Tcp11-domain-containing protein [Armillaria solidipes]
g1941	36877	37410	0.92	+
g1942	37554	38363	0.64	-		KIY64969.1	60.7	178	70	0	4	181	91	268	6.8e-61	243.4	dienelactone hydrolase endo-1,3,1,4-beta-D-glucanase [Cylindrobasidium torrendii FP15055 ss-10]
g1943	686	5041	0.23	-		KIY65634.1	45.8	950	389	14	1	845	1	929	5.3e-197	698.4	hypothetical protein CYLTODRAFT_412438 [Cylindrobasidium torrendii FP15055 ss-10]
g1944	5674	8014	0.76	+
g1945	8633	10141	0.65	-		PBK98755.1	27.5	458	307	9	24	468	9	454	8.3e-48	201.4	hypothetical protein ARMGADRAFT_588175 [Armillaria gallica]
g1946	10830	12241	0.68	-		PBK74763.1	64.4	407	107	5	3	405	5	377	3.1e-130	474.9	cyclin-like protein [Armillaria solidipes]
g1947	12292	13226	0.52	+		KIY69587.1	75.7	222	53	1	24	244	24	245	2.8e-57	231.9	Snf7-domain-containing protein [Cylindrobasidium torrendii FP15055 ss-10]
g1948	13305	17779	0.12	-		KIY69583.1	78.5	1274	211	6	1	1242	1	1243	0	1892.5	putative PRP16-RNA-dependent ATPase [Cylindrobasidium torrendii FP15055 ss-10]
g1949	17831	19642	0.48	+		KIY69224.1	67.5	493	128	5	1	464	1	490	3.2e-187	664.5	WD40 repeat-like protein [Cylindrobasidium torrendii FP15055 ss-10]
g1950	20223	22855	0.52	+		KIJ95224.1	73.6	761	190	4	1	754	1	757	0	1124	hypothetical protein K443DRAFT_134482 [Laccaria amethystina LaAM-08-1]
g1951	22990	24922	0.29	-		SJL08710.1	23.8	593	365	20	2	563	3	539	7e-22	115.5	uncharacterized protein ARMOST_12079 [Armillaria ostoyae]
g1952	25156	27351	0.75	-		PBK92925.1	45.5	635	321	15	29	660	29	641	1.9e-148	536.2	hypothetical protein ARMGADRAFT_992541 [Armillaria gallica]
g1953	28256	29669	0.2	-		KIY74429.1	71.1	266	72	3	1	264	1	263	4.2e-67	265	hypothetical protein CYLTODRAFT_484740 [Cylindrobasidium torrendii FP15055 ss-10]
g1954	29920	30730	0.25	-		PBK83884.1	43	237	123	4	3	235	44	272	2.6e-50	208.8	hypothetical protein ARMGADRAFT_620802 [Armillaria gallica]
g1955	30994	32617	0.31	+		ESK90217.1	34.3	545	195	11	4	401	57	585	1.1e-74	290.4	hypothetical protein Moror_7722 [Moniliophthora roreri MCA 2997]
g1956	33105	36063	0.52	+		PBK77797.1	52.8	794	316	18	1	756	1	773	1.3e-180	643.3	hypothetical protein ARMSODRAFT_946668 [Armillaria solidipes]
g1957	36422	37066	0.74	-		KIY67643.1	76	146	34	1	1	146	1	145	3.2e-61	244.2	carbohydrate-binding module family 13 protein [Cylindrobasidium torrendii FP15055 ss-10]
g1958	37378	38119	0.62	-		PBK77804.1	43.6	202	91	6	1	190	196	386	2.4e-35	158.7	hypothetical protein ARMSODRAFT_946680 [Armillaria solidipes]
g1959	425	3698	0.81	+		RDB22515.1	43.4	800	419	12	122	917	1254	2023	1.9e-183	652.9	putative AC transposase [Hypsizygus marmoreus]
g1960	4029	4926	0.27	-
g1961	608	1096	0.94	+		PBK77371.1	60	155	59	1	6	157	460	614	2.1e-45	191.8	P-loop containing nucleoside triphosphate hydrolase protein [Armillaria solidipes]
g1962	1871	2540	0.66	-
g1963	5012	5490	0.11	-
g1964	2	1188	0.45	-		RDB22778.1	30.3	320	192	6	5	302	102	412	6.4e-34	154.8	hypothetical protein Hypma_009978 [Hypsizygus marmoreus]
g1965	921	1664	0.71	-		KIY68525.1	62.8	234	86	1	1	234	1	233	9.6e-74	286.6	NAD(P)-binding protein [Cylindrobasidium torrendii FP15055 ss-10]
g1966	3560	6637	0.19	+		EJD36564.1	26.2	683	351	19	170	802	32	611	9.5e-38	168.7	hypothetical protein AURDEDRAFT_174344 [Auricularia subglabra TFB-10046 SS5]
g1967	7253	8605	0.48	-		KIY70115.1	34.9	307	180	5	49	354	65	352	5.3e-33	151.8	hypothetical protein CYLTODRAFT_202455 [Cylindrobasidium torrendii FP15055 ss-10]
g1968	9438	10640	0.6	-		KIY61869.1	63.7	344	116	6	10	348	28	367	9.9e-109	403.3	TAP42-like protein [Cylindrobasidium torrendii FP15055 ss-10]
g1969	11542	13706	0.14	+		PAV20398.1	32.4	343	193	12	160	469	73	409	1.3e-26	131	acid protease [Pyrrhoderma noxium]
g1970	13979	18003	0.5	-		KIY66193.1	58.4	1332	482	25	1	1301	1	1291	0	1178.7	hypothetical protein CYLTODRAFT_399105 [Cylindrobasidium torrendii FP15055 ss-10]
g1971	18488	19705	0.03	-		KIY72574.1	68.3	202	50	2	12	199	40	241	1.6e-71	278.9	lytic polysaccharide monooxygenase [Cylindrobasidium torrendii FP15055 ss-10]
g1972	22072	24026	0.86	+		KIY65024.1	83	393	65	1	10	400	8	400	5.2e-187	663.7	hypothetical protein CYLTODRAFT_380082 [Cylindrobasidium torrendii FP15055 ss-10]
g1973	25787	26944	0.15	-		KIY61872.1	75.4	305	75	0	1	305	30	334	8.1e-131	476.5	UAA transporter [Cylindrobasidium torrendii FP15055 ss-10]
g1974	27156	27734	0.49	+		PBK66423.1	47.6	166	67	3	28	189	7	156	1.6e-31	146	hypothetical protein ARMSODRAFT_960407 [Armillaria solidipes]
g1975	28814	30575	0.15	+		KIY67456.1	70.9	398	108	2	28	417	33	430	2.2e-163	585.1	MFS general substrate transporter [Cylindrobasidium torrendii FP15055 ss-10]
g1976	31490	33329	0.03	+		KIY70115.1	42.1	254	138	4	68	320	86	331	8.9e-42	181	hypothetical protein CYLTODRAFT_202455 [Cylindrobasidium torrendii FP15055 ss-10]
g1977	34176	35176	0.31	+		KIY70115.1	42	200	113	2	80	279	105	301	1.4e-31	146.7	hypothetical protein CYLTODRAFT_202455 [Cylindrobasidium torrendii FP15055 ss-10]
g1978	35756	38026	0.26	-		PPQ98465.1	48.4	579	290	6	2	575	11	585	1.6e-160	576.2	hypothetical protein CVT26_013866 [Gymnopilus dilepis]
g1979	38648	39028	0.31	+
g1980	39421	40341	0.13	+
g1981	41231	43537	0.12	+		XP_007326110.1	52.9	342	146	2	263	589	24	365	9.9e-101	377.5	hypothetical protein AGABI1DRAFT_35038 [Agaricus bisporus var. burnettii JB137-S8]
g1982	43608	45667	0.11	-		PBK94424.1	35.1	501	250	15	71	526	9	479	9.2e-58	234.6	hypothetical protein ARMGADRAFT_1079102 [Armillaria gallica]
g1983	50099	51116	0.02	+		KIJ36282.1	68.4	225	69	2	9	232	10	233	7.4e-84	320.1	lytic polysaccharide monooxygenase [Sphaerobolus stellatus SS14]
g1984	51253	52010	0.43	-		KIY69039.1	67.2	201	64	1	1	201	1	199	2e-69	271.9	CGI-121-domain-containing protein [Cylindrobasidium torrendii FP15055 ss-10]
g1985	1	2338	0.38	+		PBK99383.1	41.9	544	248	11	37	517	122	660	3.7e-94	355.5	hypothetical protein ARMGADRAFT_500737 [Armillaria gallica]
g1986	871	5214	0.01	+		XP_007385856.1	39.3	575	262	5	407	959	8	517	4.5e-103	386	cytochrome P450 [Punctularia strigosozonata HHB-11173 SS5]
g1987	5991	7212	0.41	-		PBK60194.1	37.9	177	87	5	9	163	61	236	5.6e-16	94.7	hypothetical protein ARMSODRAFT_1009453 [Armillaria solidipes]
g1988	1274	1945	0.37	-
g1989	1	1393	1	+		KDQ23811.1	75.7	218	52	1	87	303	254	471	7.4e-87	330.9	hypothetical protein PLEOSDRAFT_1114137 [Pleurotus ostreatus PC15]
g1990	1646	3396	0.48	-		KIY74357.1	82.1	474	84	1	1	473	1	474	7e-246	859.4	glycoside hydrolase family 5 protein [Cylindrobasidium torrendii FP15055 ss-10]
g1991	3733	4368	0.43	-		KIY74356.1	42.7	178	78	5	1	158	1	174	2.5e-30	141.7	hypothetical protein CYLTODRAFT_3141 [Cylindrobasidium torrendii FP15055 ss-10]
g1992	6842	9227	0.36	+		PBK87838.1	86.4	601	76	2	3	598	2	601	6.8e-307	1062.4	CTP synthase [Armillaria gallica]
g1993	9556	11358	0.1	-
g1994	12308	14516	0.03	-		KII92291.1	67.3	248	76	2	306	548	1	248	1e-83	320.9	hypothetical protein PLICRDRAFT_467215 [Plicaturopsis crispa FD-325 SS-3]
g1995	14598	17592	0.42	+		PBK73808.1	82.4	732	90	3	107	800	82	812	0	1134.8	hypothetical protein ARMSODRAFT_880250 [Armillaria solidipes]
g1996	17766	19302	0.44	-		KIY72530.1	45.8	430	180	10	3	399	10	419	3.6e-94	355.1	hypothetical protein CYLTODRAFT_388656 [Cylindrobasidium torrendii FP15055 ss-10]
g1997	252	757	0.55	+
[truncated: 10,591 more rows]

## Sheet: Table S2
Table S2. Flammulina rossica CAZymes (Red means gene predicted to encode two different CAZYmes)
Gene ID	CAZyme databse			Signal peptide	amino acids
	HMMER	Hotpep	DIAMOND
g32	GT22(55-530)	GT22	GT22		MASRPQFETLRFRRPETEKPPPKVKRQDRHAGILQDQLRRSDRAPWSPSFSLGLRILFLVRFAAAMYSNIDDCDEVYNFWEPLHFFDKGVGFQTWEVTPQYAIRSWAYILLHLLPVRLASFIFGNDKRPAFFALRIALAGASTFSEVYLYRQVYEKVNNRVGRYLFFMLAFSAGMWNASTAFLPSSFAMYMSTFAFATSIPPASSQNNYRTLATTVLFAAGAVVGWPFALALAIPFVFEELFVRGADAVPPASYASWLTLRWKRLFRAGALASLIFIPVIAIDSLAYGKLTIVPWNIIQYNVFSDRGPNLYGTSPWNFYLVNLLLNFNLLLPLALISMPCLFVTYFVDRKRLGFITPTSQQSSPFTLLGLRLLPFYLWTIVLSFQEHKEERFMFPAYPL…
g139	AA9(11-270)	N	N	CS pos: 22-23. VSA-HG. Pr: 0.5863	MSSSIFIAALAALAPLLPSVSAHGQLAAAEAAGTVYLAPNVYYAPAERNAGTPLSAMYPSNGKAWNGVGDFGDANAMACEGAAVPPGQITVTSGGALRYYFNGATSELMDRVAAAFKVDDTPYPFVHAMGTVAVDIASCGGDCANVNPAGLNWNRILYEGLDYSATVDGGVKAAMAAKPEPYQGDARWGLAALIARGSWVEAIIPADLVAGNYLTRVELAAVHDPKKPQLYIGCANTVVQGAGTKALTGGTNAGALYSSGGALAQLDVYSNGWSFNGDGPALLDFASTPSTNTGSNNSGSSDSSGSSDSGSDNTDTDTEKPTEEAAPTTEASTPAASTEEPAAAESSAAPSSCRRRRRRNVTKRASAAHKRAAFPHMHSI
g161	GH105(127-386)	N	N	CS pos: 20-21. VSA-LD. Pr: 0.8948	MARMLLSLTLFKLAVHTVSALDPFALNPGFDIQSVAALAKSLPSHSWEFGTACEVLLELYTPSVSVFGEFPFPAPVLAPEAVPALEYAKQVIVLNAPGAENGLSEGDGAVGDPASLGIFAYLLGKTDGVYAEAAVKEINFQLKAPRWQNGAISHRVDVPELWADFGYMSPPYLAYYAADTWNLSLLDESYKQCGYYREVLQATDTSAPWYGVYHHIIGPQSQDLGLWSTGNGWFAGGMVRVLAVVQKAPASLALGAAWRSKAISDLTQWIKEIVDGVVNSELVDGLVRNYIDSLDAPNGFGEISGSLMIASVIYRMAVLQPEVFGAEYIAWADAMRGTISGLDVNGNPHVTATGIVTPAVNPLDWFDTTPFTSGSPEGQSFAVLMYTGWRDCVYAGYCE…
g255	CE16(41-291)	CE16	N	CS pos: 16-17. SLS-IG. Pr: 0.3898	MLAYLLLSTLFHPSLSIGITQGQIKSFVTFGDSYTDIVNVGDGGVAWPVYAAGYSNTTLHPFARSGGTCSNLITPRPFPSIFESQLPAYFADEGLDLTPEETLYTQWIGTNDVGVHSLLTGSNAASIVDVTECMVNWVKVLYEDGARNFLLQNMVPLDLVPIYAPGSYPNKFYFTERNTTEWSVFMKELVLSGNKLSRLMLQDIIPELPDAHIGIFDSHSLFQDIYDDPASYLNGTAPLNVTGVVAPCVYQLNDGSSGVCSSVEGSDKDSFLWYDELHPSEQANRIVAREIAKVITTVYTAVEIPSYCVVLDFGEDRSKFKAFDYPYSLDVCHNCRELTLNAVDMSPQALLESSSSTAPPRLSVSSLISSTDHSAVYQVTDGERLLVVKFALWSGTPGN…
g275	CBM21(253-373)	N	N		MPYLTPSSTSSTTTTTVPPTGRPTHRRSYTHDRGPGAFASLGALPRRSSAQFHFQNDISSSNSSCDSDEDDNDPTSPPIRFRLQLNTSTPVPFPRSSPTPSPLPSPSLRNHPLPPRPAPIRTSSSPILLSNGKPLKSSLKSSSSSPSIVSLRRPPPLHLRARSAPSTPALDLLSPTGSDYSASSLSTPKNVHFPDQHLETVRLFNRSAKPASLLSVEDTETDTEVSGFPFPSIPEPSYSIQTDPIPSPSLSPDVILESISIDKLTLKGSILVRNISYEKQVHVRFTLDDWQTTSEVIAHYSASLPSLPLSRPPLTVGDLAAGVVPEPWDRFSYLIRLEDYGTSLSSRTLYIVTRYTTPSGEWWDNNSGRNYCVQFVQNYGSADWNAGTQSNDNAESTIS…
g308	GT21(68-324)	GT21	GT21		MNSSLPNGTDTVIVDDARSTLLTVLATIGVVWYTALWIIGIVGCQTGRKRYRLRPRSPLAAAAPTTVPGVSILRPLKGLDTNLYENLESTFTQEYPSFEILLSVAEENDQALPIVRDLMAKYPQVDATVIIGEEIVGVNPKVNNLVRSYRQAKNDILWVLDSNVMSSPGTLARSVDALQGHDRRGKKIALVHHVPYAFATESRIGSRIDEAFLNTNHAKMYLAINAFAVDSCVVGKSNLYRRSDVDRLNGSRKPLAKQVPADSEAGRGFTAFGRFMAEDNMIASALWHELDMRHDLSCDVARNVVGKMSLMDYIQRRARWIRVRKRMVLSATVLEPFTECLLVSAIGAWAFNRLFTVPILLFLFAHYVAWLYVDLDVYNSLAGHPLPDSLRWEFMLAWV…
g313	N	PL0	PL0		MVNYNTIHDNGSNPYGAGDPYYNESTGYIAPPQVPQKKGVSNWVKFGIPIAIVVIAGAVVGGIYGSKASKNGDSDSSSSSANGGGSGSSNPTEVASIKAELGRFATATASEFMVPVYPSTTNAAAFTAPTFVSTTDETLAWPEDPFSASSPSVTNLRSDHPRLIAPAYKWDALPTLIQNDPYLKGWNDTIFGNATQYYNLDPVAYFMDGDSGILDNAREIKMRIKALAYAYRMTKDTKWADRAWMEVQNAAGNGTTEFGPEEDKWNAAHFLDVAEFAAAYAIAYDWLFDVLTDEQKSQLRFTLTKYALAPGVATFTDETNYFGWWQTNTTGNWNCVCNGGLTLASLAILDEDEYGNAATLLGLTIPNALENCVNAVASDGTWKETPNYWYFGTTGHAEM…
g315	N	GH16	GH16		MSVAPTSHPGKILLQPAYFTSSSYINALRNDIDALVKTFESEFAETAEQDKPFTLFKTIWCTMGWQWLHFKVFDARSRDMFLQVTCRMFMEEAILAGKPLARVVGLFGLYTFFSTQPSGAPTLYSLLHVPIPRDHHSKLLSLPNDLYPSLKASAVNILRILEDAKVFFILPDSEVGTHYPRILPREVMVLETAESEAPKKKGRPSKADRAQKAQLALDNLDQWLQKTASSPSDGETTHQLLLEEPTATLETYTHWKNTLLNSLQEDPNGLAGIRDANKQIHARLKQAAEITGAPPPPATESGPVSSLLSQPVRMCYKKRVDITRCHPAFLFCSPAVLIVVSDVLSLILTTVMSYNAQRNYQKPPTYGPTANLLTESSPNLSIPAAFRGPQSLRSQASTS…
g326	AA3(336-1016)	AA3	AA3_2		MSRVLVTGSTGFLATHIIDQLIRAGYNVRGTVRSEAKHDQVGRRWVSFGPAFEAKVVPDLASSNLADIMQGISAVIHVASPFTVTFEDAQKELLDPAVKGTQNVLQSAHTSGIKRIIITSSIASVFDLSKGGPRADHSYTPNDWNTLTAEALSEKSAWNFASAHPEIQLTAINPTMLYGPPVQSASTGSLNESAMELYDLFRGGMVKVPQTAVPFFVDVRDAAIAHVLALQNDSVIGKRILLSAGTYTFHEVRHTFYLRCNLTEEXXXXINHSTGHDNRTATRVNIDAAEAICKAWPSIRTLKSSNHLFVELHLTFPSFATNMWPLAVAVLSLASNVASSSDFQLRDSLRARNIVYDGTISDSYDFIIVGGGTAGLALAARLSEDSNTTVLVLEAGHTG…
g331	GH13_40(31-393)	GH13	GH13_40		MTLVSNEPWWKSSTVYQIYPVSFLDSNGDGFGDLNGIASKLDYLKDLGVDVLWLSPIYKSPLADMGYDIADYRVIDPRYGTLEDWDNLLKGVHERKMKLMMDLVVNHTSDEHEWFTESRRAKDDPKRDWYIWRPPKFDAEGKRRPPNNWRSVFQGSAWTFDESTGEYYLHLYVEKQPDLNWDNPTVRNAVWDVMRFWLDRGCDGFRMDVINIISKTDGLPDAPTADPNEEFQPASMYFANGPRVHDYIREMREKVLDHYDLITVGKTPFTHSTEELARYVLPANKELNMVFQFELMEIDQPKHTDASPLEHYSWKVSELRDIISRWQIFKRDEGFWNAVFIENHDHSRSVSRFGNDTTDELRKLSAKLLSILEVTQKGTLYVYQGQELGMKNFPRSWGL…
g332	CE15(39-354)	CE15	N	CS pos: 18-19. VSG-QC. Pr: 0.8728	MLFVTISLAFLAVQRVSGQCASLPSPLPGYNNLSAFNPLPDPFKFYNGTALSSPNDWTCRRAEIKTLLQEYMYGYYPDHASENVTATRSGNTVSITVAAKGKTGQFSATLSLPSGASKDKPAPVIIVIGFGDSTFVNNGIAQATFDAASVAADSNSKTGAFRNIYSDDVGSLLAWGWGSHRVLDALKLVAPEIDTTRVGVTGCSRYGKGALAAGIFDDRITLTIPMSSGVFGTSPIRFRYEQNGWNERLQSNVEGAPWWTKSNLKDYIPGEKRLPVDANFLTSAIAPRAAVWDQGQTDYQMNPEGVAGVVFPATQSVYKFLGAEQNVGVALRNSAHCDPSGTTNVLDFVKSVLLNAQRTRNYAAISPYQAHPDAYPWII
g347	N	GH16	GH16		MPGAHRRITSIPRRDSDQSLLSSAARMAPIPGSPSVDSHALSSESTPYTIATSARGHQSKTTSISSKYSLHADPRTWGSNLYPQYTEPDDALHNPTVKGGKVVDDVQVTWSLRGVSNLGCLSFLLIALLLLFAGYPAVSFQRRHNYDNHPLGVNASGQVPYMPGSFSLVDPDTPQDARTKKSWRDGDEWQLVFSDEFNVDGRTFYPGEDPYWEAQDIHYWGTNNMEWYDPDGLTTADGSLVVTLSEKETHNLHYQGGLMTTWNKFCFTGGLIEAAVQLPGSSNVVGLWPAVWTLGNLGRAGYGASLEGMWPYTYDSCDVGAAPNQTIEGKPLAAATSGWDDANYALSYLPGQKLSRCTCPGESHPGPVHQSDGTYVGRSAPEIDLIEAQVTDGVGEVSQ…
g359	GH13_1(59-370)	N	GH13_1	CS pos: 21-22. AFA-AS. Pr: 0.5796	MVHSLTALLSLTSVLVPAAFAASADDWKSRSIYQLVTDRFATSDGSSATCNSEDRKYCGGTYQGVINHLDYIQNMGFDAIWISPIVKNIEGETAKGEAYHGYWTEDINSLNDHFGSADDLKSLVTALHDRKMYLMLDVVVNHFVANPSSDSTSLPQSFDYSALKPFSDASDYHSECFISNYDNQTEVEDCWLGDTELPLLDVNTENTEIVSAFNDWVANVVSDYDVDAIRIDTVKHVRKDFWPDFVKASGVFSIGEVLQGDPQYVKDYTEVMDNVLDYPSWYPLIRAFTNTSGSLSELASTYTTTQSVFKNGLFTAGSFLENHDQARFQSHTTDSGLVANAVAWPFINDGIPILYYGQEQGYQGGEDPENREALWFSGYEQDKPLYTQVKALNAARKLA…
g384	GH5_5(1206-1486)	GH5	GH5_5		MMSFSPRLXXXXIHRDITPPRALARHLGYKICAPSPNLSKHNLYHRPLPPPPLSPPMSSSPTLNSYCVSCDEYFEFHKCSAGISQYDLAAIIDDSPLSLNVIWESDEDSDDESSVDEFYSDVDESDDEEFDAIVQKYSSSTAPCVSLATILESDDEEEDEDTYPHVDDFDECDDSGNTTQKPLHVSHQPTLDSILESDEEDDTSEVNSPHPSYVVECELEDLVSATQKLPVRVSRQPILDTIMESDEEEDDTPLYMGITFTIPIAITVSVTVKLSGPGGDAPSASGEFTFRAVVLGLLIGCLLCFTNLYFGLQTGFISMMSLQSALIGFLVSRILPNPMTPQEIIVVQTTAVATGTMPLAAGFVGILPALGLLDEERDGTPPIHLSWIAAAGWSVFLSP…
g488	GH5_7(118-397)	GH5	GH5_7	CS pos: 15-16. ALA-VV. Pr: 0.5774	MKVFWSLALVTPALAVVSEWGQCGGTGYGGDKICASGLNCVEINQWYFQCQKGASSAVITPSTSVAAPTSAATSAPFPAATGFVRTSGTKFTLDGAPYTVVGTNSYWVGLTGYNLSIMTTAMGDIANAGSTVVRTWGFNEVTSPSGVFYQSWQGSTPTINTGSNGLQSFDNVVAAAKAKGLRLIVALTNNWADYGGMDVYVKQILGSSGAHDSFYTDAAVIRAFKSYIQTFVSRYKDEPTILAWELANEPRCKGSPGTSSGRCTTATITTWAKDISAYIKSIDSNHLVAIGDEGFYNQPSAPTYPYQGGEGIDFDANLAISTVDFGTFHSYPGPWGQSSNPQAWGVQWIRYHAASMKANNKPVLLEEFGVTDNRPTVYSAWYAEIESSGLSGDLIWQAG…
g540	AA4(93-327)	N	N		MRTDDQNTEGEKCRVVPRDRAAAAILCPAPTPHVPYARLAVNSFRNVRASHAQSHLNSVTEQDVAHFSKILPSSSIITTLPPISMSSTELDPFNQDWMGKYKGNASTVLKPKTTQELSDIVKWCNEKRIGIVPQGGNTGLVGGSVPIGDEVIISLANMNQVRSFDPISGVLIADAGCILQALTDYVTPHNHIMPLDLGAKGSCHIGGNVATNAGGLRLLRYGSLHGSVLGLEVVLPDGTILDQLTTLRKDNTGYDLKQLFIGAEGTLGIITAVSILTPPAPQASNNVILALPHFDNVLPLYQIVKRQLSEILSAFEFIDRTAYELAVKHGQGRALSDEDIEGAECFVLVETSGGRREHDEEKLNTLLETLMEADQPLINTGVLSQSPAQFSSLWALREG…
g555	GT8(418-673)	N	N		MSFASISRAARTRSLLQIRGLATPATKASSRSNFSEVLAGGPSFDEFVSQNQPERVVLGNTRGERLPSYLKTSIPTGASFKKIKKDLRGLGLHTVCEEARCPNIGDCWGGKEGATEAEGRSAATATIMLMGDTCTRGCRFCSVKTSRAPPPLDPHEPENTSEAISRWGLGYIVLTNVNRDDLVDGGANHFAETIRKIKQKAPHILVEALTGDFDGNLEHVSIVAKSGLDVYAHNVETVEALTPFVRDRRASFQQSLKVLERAKKEGVRVTKTSIMLGVGESREQLLETLRELRKVNVDVVTFGQYMRPTKRHMKVDRYVDPSEFEEWKGIAEDMGFLYVASGPLAGEFFIENVLKGKSAERKANRLVVSGASTANVDITERVEAYRIYHCRTIGSPIDD…
g565	GH3(96-318)	GH3	GH3		MLSSLTVLTSMATYAFALSSGVKDAFLDSLVNQMTIPELVMQVHLMFGDNIIGPKSENELFDYALRHAPDAGIGVIHDWYPTEPEYYNSMQTLNFEKSRLEIPFMQLGECLHGVGSYKQSMFPQPIGLSASWDTDLVYKVGRAIGTEARAIGLHACLAPVLDLGKEPRWGRVQEAWGEDFILTSHMGVAFASGLSKNQSYSDPDAVVPVMKHFAVHGSPRGGVNAASYMGHGTRQIRMEMLTPFKAVYELGGAKGVMMAYNEFDEIPAHVHPMLYDTLEEWGYDGFVMADDTGMKMLYVRHQVSASPADTIQQWFNAGGQLQFYDYDLETYLNDTIDLVRNATVPDATLRAHARSILSVKYDLGLFDDAFIPDTVDYRAITAQNVPLTLDAAHRSIVLL…
g613	GH5_7(53-366)	N	GH5_7	CS pos: 18-19. SSA-AR. Pr: 0.6184	MEFLIFVVALAIVALSSAARPKGFVATKGRNFVLDGKPFAFVGANSYWLPLLTNQHDIDATFKEMQDTGIKVLRTWGFNAINATELPYALESNLTYYQVWNGSDWTLNDGPQGLERLDNVIATAGRYDIKVILAFTNNWIGYGGSELYVNWIAGSEATHDVFYSHPDINKSYQRYVKTIVNRYKDSSNVFAWELMNEARCRGDLPGSSACDPKSGLISKWYKKQSDFVRNLDQHHLITTGGEGQFNWKHPKHYWYNGAWESDYNYNGEAGEDFDKDLDLKNIDFGTYHMYPTFWYSKLDTPGSNFSVEKWGLEWIEDHAKAAQKIGKPLILEEFGHPGLENKTEFYPSWVGKALKSGHSGIMPWQFGMLDLTEYGGNRLIKYADAIIDGASPNDGFTYY…
g635	CE10(263-401)	N	N		MIVISCPTSHPAHKPDKEEEEDAGCCAHLKRLEALVDHYAHPGVTPPSARVFPSLKIHVQPEWKPWHSWKYAWFVATKATQMTGDALKHTIWGPRKKSWGIQMTLMSSLMRGAGEHTELMDVPSIRLFMGMGGFGPPPADALVTPVTFQVKRRRLRGILESFDVQEDGTRELSAEWIVGKRTWQRLQTEWKAAQVGKRKSQPKQTEHVILYIHGGAYYVGSAAEKRVISIPLAQYTDARVFSLNYRLAPETTFPGPLHDAICDSAGGGLSLAVLMYLRDNEYPLPAGGILMSPWVDMTMSCASWESNAAYDVIPVFNPEDHMNPIANYLGEGMEKYLLHPYASPIFGDFHDLPPLLIQSGDSEVLQDEITLLSRRAEMAGVHVRHEQYQDGVHVFQTFP…
g649	AA3_2(15-546)	AA3	AA3_2		HTGDEVADQINIPDETYFNTLTNTEYDFAYVTAQQPNLSDRTIAWPRGKVLGGSSAINAMFYVRPPQVEIDAWHSLVQDQDGADNWTWDSLYNAMLKAETFHTPSAEAVEDGGITYDESVHGTDGPLHSSYSPFQISFNGYWQPTLANAGIERRTDSTGGENWGSVISPSFINPSNWTRSYTRSAYIDPLPPRDNLDILADATVTRITFEGSGDNLRATGVEYAAAEGDETTTIGVSREVILAAGVMGSPQLLMLSGIGPEDVLNDVGIDVRKALPGVGQHLQDHLLAAMYWSTENQTAGDLHESGLDTPEFLAVVNAATAYVNITAILGESNKTEIIQNIKDTIDASVSLVPSDSDQVRAGYRAVFAKTIELFETTAMPNVEILMSITGAGSIGMQAS…
g667	GH55(37-775)	GH55	GH55	CS pos: 23-24. VSS-LG. Pr: 0.3233	MAISAPTLLLAAALSCMFTLVSSLGTACSVPLSAGTAAASDPYWLQSIKHQGTAAFDRNPASYQVFRNVKDFGAVGDGVTDDTAAINAAISTGDRCGGSIGVTNACNSTTVSPAVIYFPSGTYVVSRPITAYYYSQLIGDAKVLPTIQASASFVGLAVIDADPYIDGGSGAGCFRSVRNLRIDLTRMPAASTATGIHWQVSQATSLMNIVVDMSTAADTNHQGIWMENGSGGYMGDLVFNGGKFGMWVGNQQFTVRNVTVNNANTAIYGIWNWGWTFQRVTINNCQVGFDLTTGGTTQETQSVGAEAIIDAVVSNTPIFLRSSVATTSLAGSLVLNNIQLTNVPVAVSVLNGPVLLEGGTKTIASWGQGNIYTGTNPAGRFVQGDIVAVNKPAVLLDGS…
g669	GH88(63-384)	GH88	GH88	CS pos: 17-18. ALA-LV. Pr: 0.6585	MLLNILLHFLVLGQALALVKPAKQLISPLIPSKLLATTKSLPSHIKYPQWTTSTGSWSFFPPDNWTSGFLSTSLYALNTRKTLCGATAKNQLGIADWIQLGRETSAALAQLTINNGVGHDVGFLSFPFMEELKVNSKNTTAARIINEFAMTLAKRFNPTVGCTRSWGETDSTDFQVIIDNMMNLELLLVSSALTGNVTLKDIAISHATTTMKNHIRPDGSTWHVIQYDANTGKVTQKRTAQGYSDSSTWARGQAWGIYGFANMYNWTRNPDFLETSRKLAGFFLDSLPHDDVVPWDFAAPPVGRPADSSAATIAANALLYLSTLEDNPNKANTWRTSAIQILNKITTLSWNESWDSLLSNVTVNKPANNYLTGIVYGDYYFIRAGNELISMGLQEC
g677	N	GH16	GH16	CS pos: 22-23. VDA-AT. Pr: 0.6743	MRLFIIFACLAPGTFPGPFVDAATVIPADSFSSFSTYWNNFYPWGTDHNGSESIFSPFGVMKLSSMIGGRMASANIIVASNTLSLIATPTSNPSPPTSTSNPKPAIHYASGAIHAKEHITVTAANAYTVSGEFSAPTAVGTWPAFWLTAVSGWPPEVDIGEWKGTADNWFNTFNTSSVVKSTLVDWPTDLSFHSVKAVLTAQSNNKDVKIDFYMDNEFIVTQYGSGFVGKAMYLIINLQMEGSSGSPGPSGRTVYKARNVQLPSDAISTPFIMARTSQPLAPSNTTPADGTSSSKVSKLGIPASKPPPKATKSDGVTAPIRSEIQTQTYKKRKADTPKSKPEKKQRKETKERVISDLSPYKNMGEQAHDFQKSYFKRTKPGDAKLMLTSEDHQALTQHW…
g684	GT69(156-394)	GT69	GT69		MAPKLWNSSFPPTTMNKQPPGLGVAHHLRRIPVPIALAIGIIFGIIISRAIPWSTTTTPVWRSGHIPAKSRVQTRHAFQPPSLDQRLRVLDLLTSLTPHYTKECTRSAQPLYALQALERYAPLVGHKTPSRSSWLDTLGLGGEQPLRRDVMYNEHKYFFAINLYNSFDVIPDLFSTLFRVAAVLGYQNVFVSIYENGSTDQTKALLRIFDALTRSVGMRVTIRTSMRTRGAFNHRIEYLAEVRNAAFVPLHELRDAENEYFDTIIFMNDILPCVDDLLELIWQSRRNNAGITCAADYMYHEELGSPVFYDNWVARDINGTALENAPFESIFHHRDSSSRFQRHLPIQVQSCWNGIAVLDPAPFYSPPHVRFRMAHIMDGECSASECSLICNDYWESGYG…
g722	CBM13(33-154)	N	CBM13	CS pos: 16-17. ATA-SN. Pr: 0.5543	MNRLLALSVLVGVATASNGVPNYLGKVLLQPGLNSGKCLTASSNSDGATVTLQTCTGAAAQAFSFTNSNGNVVVHGNKCLDVPNGNTADGVKLQIWTCSNNGNANQNFYYTDDYHLAWTNHGKCMDLTDGSLADGNQIQLWSCSSGINQRWYTGYHLSSLPNTSEAGQTGTNSCGTGSSTSSQCQTAFVNSAEDFCLWAPPSVDTIGNTERIEVAWCTKSGRGTRLIPDGTLQGVHFVKTTDYVQVTGVGDFTKINIPAGDSGGELDPHGADGNGNPIGGLVYGNSFGTGLQYHEWTSFISDNEFCFRACVGSMATSYCQHIYDVMGCYWNMPANYDSGVFENCDAANDQPMGVYGTSTWYQGVQPTPAAHPAASSSNCKALPTVSVTPLRKRRGLERV…
g737	PL4_1(19-516)	PL4	PL4_1	CS pos: 21-22. TAA-FG. Pr: 0.4632	MLRLLVTAVASACLWITSTAAFGLTVSGNSYVVDTSGGLIFTVERTSGDITSMKFNGIEAQGSGKRSHISSGIGASCSYYQGGNSDNYIVITCTTSTLTQYYVARYKDPAIHMMTYTSQQPSVGELRFIARLKYDTLNRGYAVSDTVGGSAIEGSDVFLVNGQTRSKFYSSRQFIDDQVHGVTGSGIGAYMIIPGTGYESASGGPFFRDINNQGSGDQELYFYMNSGHTQTESYRTGLHGPYALWFTTGSAPSTYDYAFWEGLTGISGFVPVSGRGRVTGKASGYPSSDASLIVVGFTNSAAQYWTRADTSGNFVSPYMKPGTYTMTLYRVELAIATKSVTVSAGGTVSSNIASSETTPNYIWKIGDYDGTPRGFLNADKIETQHPSDSRMSSWGPVTY…
g741	GH16(38-316)	GH16	N	CS pos: 17-18. SLC-YD. Pr: 0.9494	MLRQWLLPLCLAGQSLCYDLVHDYSGSTFFDKWDFFGNWDNLTLGDVWWLNRNDALSQGLAYVNSAGNAIIKVDNMHDVAFNQKRNSVRITTQESYSVGSLWVIDVLHVPFGCSVWPAFWTMGPNWPEDGEIDIIEAINVMPFNQMALHTTSGCFHPPDEDQYQISATLERDCSLPSGCTVLELQENSYLTGLAAAGGGVWATQFDVAGIFIWFWSRPNVPASIAASSSSSPLDISAWGPPTASFPASHCNITEFFSPQKMVMDITLCGQWAGLPEQYFPTCGSNGPTGTCYTDRVVGPGSNFNDAFFEVKYIRAYTTGSPVPTPNALVSIPPHTAPTKLIASALAPANPTVSPLFFNAAMRNTMMPGMLSLTVCWVMIMLFI
g762	AA3_2(12-611)	N	N		MPLVTVQDVAEKAFDYVVIGGGSAGLVLAARLSDDPNTSILVLDAGKPNFDDALIIRPGQYGRTFMNPDYDWAFKTVPQENLGGREVLWNRGKSLGGSSAINFSCWSVPPKEDIDDWERLGNSGWNWKTYENCLRRVATYHSNGESDATSDIPERVEAMKPWEAGWGQGPLKISHPKNILDIEYKLQETWVKLGLPRAQASHAGSPKGVSLIANTLDPETNGRSYAATAFFKPNEARPNLEVLTSASVSRIETENVGDALLTATTVEFWHAGENGTPNKYSVKVKKEVVLCAGALKSPQILELSGIGKPDILDSLDVEVKLPLEGVGENVQDHTFLGVTYALKDDFEGDTYDILSDPEVAAKQAELFKEKKGVFMMGICSMAYAGLSTVSPRSEDLLKQ…
g807	N	N	GT2		MSSSITIPIFNGQGSSPSKMAEMRDLVLSDALRPLGCVFLSACHAAFHTELSTLTSLEHGVDLTDFTTKESLITVPKERYAYNAIISGSTLLLVQILRYLSLIDTATSLTPFSDMLNLNATHGVGVLGFSSGILPATVVATSLSSAAFLHHAVETYRLALWIGVRVQQYRTTTLNACYSEPSAPWSLVFLGSERAKVERAIEVFSKTREASPLYVTAVIDATCVTVSGRPDTLDAFAKHFGAAVHKMSLETLYHAHVHVEGARHAILSDACRRNIEFPRMADISIPLRSTFTGQALHKSDSGSLLELVVDMILTQPVNWDLVVRNAAQMALPAPVRVLNVGPGSGLAKSFVKDLGSAAVMFDLSVTNLVRPPKQEPIAIVGMAVNMPGAPNVSKLWEVL…
g810	GH12(88-228)	GH12	N	CS pos: 16-17. ASA-QT. Pr: 0.6822	MLSLSAVFLFLASASAQTLTGQFDCLEGSSYLLCQNLWGAASGTGSQSSTLIKAEGNTISWSTNWTWSGNENAVKSYANVESNTSKGVQLANVTSAPTTWTWTHESRSNSIRADVAYDIWTGVQSVGAPASANSSYELMIWLSKLGSIQPVGSQVTTGTQIAGYTWDVWRGLNTNWQVISFVGSTEITDFNVDLKDFFDYVIAEQGVASTQYIQSIQAGTEPFTGNDSDLTELTSSDEEPLSQITANKKKKTTKTVYRPALRPPRTVQYSVESLYKKLYHNELDLDPEYQREVVWKDQKQQQLIDSLMNNYYIPPLIFAVTERDGEETRVCIDGKQRLSSIQRFMDGHIMLKDSVTSQKFYYKKIGNKKEKQLPPQLKTNFENKQITCVEYENLTPDQE…
g822	GT24(1202-1449)	GT24	GT24	CS pos: 16-17. LNA-SP. Pr: 0.8199	MRRLLALALLPAILNASPPVKVSLRTSWNGAPPLVDETVALENPSAFFPLVDRISHPDTHALSHSLSPEALHQLGLETAVSSGLLLEPGSLQAVEMNLAMHSSTPKIEAFYKHYASLPANSACDGSWVDWHGSVACDVETLVQLAGKETIDSRAGEPTPFIPPKLFSFDHVHPYQTRPRRTAILYASLESANFRELHEYLLTHALSGALEYVFRHIPPLHARPKNYLTGYGVSLDLKKMDYLAIDDRNTNNAGDQVADEEAPEKLDIVASLIAAHPEPSVITDTLSEDDIVLLGLKASQIIAEAEDPLEVLRQLSQNFPKYTTALGRRVVANESITEEIHGNQLKIQAGTNAFWLNGNPIPVKDITPFGLLRLFQKERSVMTSLTSLGLSKLEAFELLT…
g871	N	N	GT2	CS pos: 23-24. AVA-AN. Pr: 0.7416	MKSFRYLSLVFLGIFQLARPAVAANGTCISSPQSSCTTLVALCVNKVASGQVLSLSLLSIGLDLWQVASNNFWSVPECFTGATCAGVYAPMVGSCASDPNGCPVTWTDFVNYFYNTVQGTLAMDWPTSGDAVLAWWAEIATWTGFCSGTNCVNGRIPYTNLDDWLRYSSEVLITTPGSPPIRDPLSPIRDENEDDWDPVTNGPCPYADSSLCGYDDGPQEPPEPDSVSFTATSAGPKPKFATLSLTRGDTSSSLVSSSIADDFLPRNVPPAVYITNGTERVAVDLNLEGGSPPERRSFSIVERAIESMNATLLQHRAPXXXXXXXXXXXXXXXXXXXXXXXXXXXXXXXXXXXXXXXXXXXXXXXXXXXXXXXXXXXXXXXXXXXXXXXXXXXXXXXXX…
g874	GH16(65-324)	GH16	N	CS pos: 22-23. VHA-RY. Pr: 0.9369	MHSILHAYSSLLLFTTLNCVHARYFNIANRFQGADFLEAWEWKTFDDPTHGRVDYVDRSTALQTNLSYVSADNQKFVMRADAYEIVSSGSRGRKSVRIESTTSYDESLLVVDMQHMPEGCSTWPAFWTLSKDGPWPNGGEIDIIEGVNTNDQNLASLHSTPGCNMSDPRPQSGRSVSSNCDSNVNYNQGCGVAFQQLNTYGSGFNGNGGGWYAMSKTRSEGVKIWFWPRNSQSVPVEVRDFRGDDTISTDAWPQPDAFFPTDSCDHSDHFNAHNMVFDLTFCGDWAGTAFGQAGCGTSTCQDYVDNNPNNFKEAYWEINSLRAYNMVQTPTPYPTQS
g885	GH13_8(231-524)	GH13+CBM48	GH13_8		MPEKPLEPQTVLDVDPWLEANVDSIVHRHDLFRKLKDSIEQHEGGYDNFSKGYLKFGLNVGANGEVVYREWAPNAREAYLIGDFNDWNRTSHPMKKDQFGVWDITLPRTSQGACAIPHDSKIKISMVIPSGQRIERLPAWIKRVTQDLSVSPVYDARFWNPPESEVYKFKNPRPPYPKDARIYEGHVGIATAEGRVGTYKEFTANVLPRIKKLGYNIIQLMAVMEHAYYASFGYQVTSFFAASSRYGTPEELKELIDTAHGMGITVLLDIVHSHACKNVLDGINEFDGTDHMYFHEGAKGRHELWDSRLFNYGSHEVLRFLLSNLRFYMEVYQFDGFRFDGVTSMMYVHHGIGTGFSGGYHEYFGPGADLEAIVYLMIANDAMHSIYPRVITIAEDVSG…
g891	AA7(138-333)	N	N	CS pos: 19-20. VSS-SR. Pr: 0.3915	MLFTATTPLILGLASVVSSSRDTQAEGLTGVVTTSSITVTQWSDLNATLVGKLSTATPFAAPCFDVVNGATNKDKSGCAAVQSGYRDPFYRASRFNAFIWPAWEGCIALEETCQLDPSSTNNSVAWEGKNCAQGSLSEYFVEVSSPQDVQNVLRFVRDTGVLVSVKNSGHDFGGRGAQIGSLSIWISHVPSFVPEGALESTGGTSVLTLGAGVSFYSAYEFAEAHNLTVVGGYHPTVGASGGWLMGGGHSILSPVFGLGVDRVLQFKVVTPDGNYLTVNEFLHPDLFWALRGGGGGTFGVVIESTIKVEPKMKLQVASLSFTQTSENARGFLKLVIDNSVKWGKAGWGGHISPRNLVSVTPLLSLEEAQESMKDAIDYTLSQNGTVVIEELPSWLAFFD…
g911	GH17(116-385)	GH17	GH17		MPSSNTHYETVGSGMTYSLEKSRARSRRSKLIVIGSIIAVLGLVAIGVGVGVSVSNNNKNNSSSSSSSGSNGPEQTDPNDPSTFVADSNLHKSLYGLAYTPEGSLLPDCGNSLGEVIKDIQLMSQLTTRVRLYGADCNQSALVLEAIKQTKVDMEVFLGIYPIPDDDSAYERQRDTIKEALQTYGADHVAGITVGNEFILNYVTEHGGSPNDATGNTAGAMLVANIKDTKSMVQALNLNKDIPIGNSDAGSYFNDLVLEAVEYGLSNVHPWFANTTVEDAAAWTATFFEETNVIPASQLPNSPKMYIAETGWPTESSDAGNANNGASPASEAGLQTFLDTFVCQANTNGTGYFFFEFTDEKWKDDQFGGVEGHWGLFHQNRTLKHIEIPDYFLLTILPR…
g926	N	GH16	GH16		MTDFSRKRYESSASVSLLGARRTPSSASFGDWGETPYGNSRSTNSLSDKFSLAADPQTWGSRLAYNDHEPDDALHNPSAKDDTSSVLCSMRAVSNLGCLFILCAAILALFMGFPILTFMQDTTSAIANNLGVNSTGQVPVIGNFGLIDMDTPQEAYTSKSLRDGSEWVLVFSDEFEQEGRSFYPGEDPYWEAVDLHYWGTNNMEWYDPAGVTTGNGSMLLTLSEKATHGLDYQGGLVQTWNKFCFTGGYIESSIRLPGIHNVVGLWPALWTMGNLGRAGYGASLEGVWPYTYDACDVGTAPNQTVTGLPEAALTSGNEDVNLELSYLPGQRLSRCTCPGESHPGPIHPDGTYVGRSAPEIDVFEAQVSNNVGEVSQSGQWAPFNEGYVWDNTSANFVIE…
g972	GT22(8-398)	GT22	N		MAVVLDAVLLATSWAHVLLAPYTKVEESFNLHATHDVLVYGVKPAALANYDHFIFPGPVPRTFVGSVLLAWLSTPVLWIAEHFGLIHSKFDIQVLVRLVLTSVNALGLCLIQRAVSRRFGRLASLFFTLFTISQFHLPFWMGRTLPNMYALFPVNVSTYLILDRAPAATRPSKTQVNMAISLLTFTAVVFRAEVALLLAPLAIQCLYLRYITFTSLVKTGLLAGILSLCLTVSVDSYFWRQYLVWPEFSGIYFNVFQGKSAQWGVDPPLTYFLAHIPKMTMSCAALAALGILIDHRIRSFMFPAICFVTMISFLGHKEWRFIIYVVPVFNVAAARSAKWMAGRGKNQLAGRLLFASIFGLVALHFFFTTIHTAASIVNYPGGEAIMLFNDRYAGASDPP…
g985	GH10(184-374)	GH10	GH10	CS pos: 17-18. TQA-QS. Pr: 0.8571	MLALVSAILLSATVTQAQSPAWGQCGGISWPGATTCVSGYTCTVHNDWFSQCLPSSTSVSASASASASVALPAATATATPLHTAAKAAGKLYFGSATDNGELSDEAYKAILSNSSLFGQITPGNSMKWDTTEPSRGTFNFTRGDMVADLAAANGQLLRGHTTVWHSQLPSWVEAGAFDNETLTNSWDVVNEPFNEDGTFRESVFYKTIGESYIATALKAARAADPNAKLYINDYNIDGTGAKSTAMINLVSSLLDQGVPIDGIGIQAHIIGGSVPSTLQANWQAMADLGVDVAITELDIRMTLPVTAALLEQQKADYQKVVAACMAVTRCVGITIWDWTDKYSWIPSVFEGQGAALPWDENFVAKPAYDGIVNAFTA
g986	N	GH10	N	CS pos: 20-21. SQC-LR. Pr: 0.1771	MRIPVSTVIISAAAVWYSQCLRSTTTATSVPASSTSASVSTSVAFPTATGTGTPLHAAATATGKLYFGTVTDNGELSDAPYKAVLSNTTSFGRITPSNSMKWEVTEPQRGTFDFTGGDVIADLAEANGHLLRGHTTVWHSLLPPWVEAGAFDNETLTQSMALCWQSIATAFKAARAADPNAKLYINDYNIDGTGVKSTGIINLVSSLLEQGVSVDGIGVQAHLVVGTVPTMLQETWKAMADLGVDVAITELDI
g987	N	N	GH10		MVGKPLDLLAKGARVLLVSRDVTKLKDLPSDAGLKTASVDYDDEKQVSQVFKDHAVEVVVSTLTTEINLIKETQVRVGRAAKEAGVQLFLPEEFGFFPDGHPEDSIWGAKSMAASRLKEVGIPTTRIITGTFTEIIPWLASTDSKPGEFVIAGTGEHKVSFTALTDITGYVAHILTALPLSFLADKILLLEGQAATLREVAEILHKDVTNLSSFDELTNTFVRNIQKVIDAGYGRTGFSIANSDAPQEVVEKRSGSGNALWEGHVWKKISDVFGA
g1017	GH5_5(98-392)	GH5	GH5_5	CS pos: 19-20. VHA-QS. Pr: 0.9636	MYRSLRVLLLSAVTLSVHAQSPLYGQCGGTGWNGDKVCVSGSVCTVLNEWYSQCLPGTAAPAPSTTIATATLTTTSTTLPTGAECAVPPASAGSLELKGVNIAGFDFGCATDGFCNTTGAWPPLTQLGGNDGEGQMRHFFNTDGFNTFRLPVGWQYLTNNVVGGNLNEANFQKYDTLVKTCLNIGATCVIDIHNYARWNGGIIGQGGPTNDQFAALWSSLASRYKDQSKVIFGLVNEPHDVPDIKVWAASVQVAVTAIRKAGATQQIILLPGNNWTSAGTFISSGSADALKTVVNLDGSTTNLVFDVHKYLDSDNSGTHIECTTNNIDGAWKPLAEWLRCNGRKAFNTETGGGNTQSCVKYTCEQTAYQAANSDVYLGYVGWSAGNFADTYELNEVPTY…
g1019	GH18(19-263)	N	N		MGAPPRSLRLSPRAEENANRVVMYYQTHFKRNDKNQETEDLVDPLHLVGQITHLMLGAFHLNEGKPEADKVTLNNHVPHDDYFKKLWPAIKEMQEKGVKVLGMLGGAAPGTYTMLTDEKWDEYYPALKKVITDHKLDGMDLDVEQPISLQTIERIIETLKKDFGDKFIITLTPVASALSGGRNLSGFNYLDLEKGKMKDKISFYNAQFYSGFGEFTYDEYVKVAEGGIDASRITATLLTDPRHGEGFVEVDKTKSAIQYLMEKYGTKWGGVGGWEYFGAKKNWAKTIHKTIQRGTEKREVGKEDPDVLQRRSGMRRVRFSREWP
g1039	GH30_3(56-408)	N	GH30_3	CS pos: 18-19. VAS-QQ. Pr: 0.7675	MRIRFLTIPLLLVSSVASQQIWDIWQTTWDRSRIFTSLAPTSPINFGSPSTIGSADIVVQDSNVYQTIAGFGGSLTDSSALLLSNLKSRNSGNYWALLNTLFNAADGANAAGLSYIRVPLGASDFAARAYTFADTPDDTSFNNFNLDAAPWYLYTVLQDIYSVNNGIKVHVIPWSPPGWMKDSGTMNGGSLKSNLINTYAAYLLKCLQGFRNRGFPLYAISIQNEPQHSNPTYPTTVFTPATEAQVGIELRRLMDSNGFQSVKLLGYDHNWDNAGSYAVQLMQNAPNAFAGVSFHCYGGSVGNQDTFRSQWPNKEIYFTECSGTIGSDWWTDLKWYMDNIFIGSVQHYSMSGLMWNIALDGSGNPKLPGTDSCGGPGCRGIVQINSDGSYSVNQEFYAM…
g1041	CE4(211-321)	CE4	CE4	CS pos: 19-20. VNA-HG. Pr: 0.7621	MLKLPAFVALFAAIGVVNAHGINPRHAHLKRQDTTASSSATAAPSGSASGSAPGSASVASTTASPSAPAGSQPAGGLASLSATRTDIPPLSEISSGMPTGTTYTATTTVQPGTVPTIADLDNAPAIPAFVFQMGEWPAQDKVPPTDSEQVKTWLKELEGFDIPDLEPTTDGYCASDPEFSGDAENRGWWTCGGWTRDTDILACPDQLTWGVSFDDGPGPYTVKLLDYLDEKDISATFFVVGSRVIERPDILKQEYTSGHEISVHSWSHSHLTKLTTEEIVAELGWTRRAIKEVLGITPTTMRPPYGDIDDRVRAISLAMGMIPILWTKGPSGTFDTNDWSVPAGNVDGVESIQKFSAILGDAAGLDTGFIVLQHDLYEITVDLSIGYSLELAQSHNPPF…
g1079	AA7(279-478)	N	N		MVSRETRQSSGGGSSRRIDEQKRRIQTIVSFRLTMYSNFAPDREQGRPVHLSIGARDSSVIILVREDHIQQDSGQKEPEAREVINPRPCSVLFVAYRILRYTAVLPYESGSSDPGFVSGSFPTSDIGEYKYMVRGLTTMPTTVLLMLIPSLGSLFFSSLMVAFIPGQSPLRVEGLEKHWIELNATLGGSLTRGVPLASACALNASSPSCSATQKGYLDGVFRSNSSGGFVNAQWESCQTTGDACLLDYTNITDLRPITGSHECRKGSVSDYYIDVRAPIDVSAAFSFARRSRIPLVVKNTGHDYKGRSSGPGSLGLWTHNLKELSYDPHFLPEGSPSDSTFPAVTMGAGVQWHEAYAFAESNNITLVGGTDRSVGASGGWLMGGGHSLLSNTMGLGVDR…
g1181	GH16(68-296)	GH16	GH16	CS pos: 22-23. ALG-AR. Pr: 0.7363	MFSLSSAAVAVLLSSVASPALGARYGLTDNYVGSSFLSAFDYMAIADPTHGRVNYVDAGTATAQNLTYASSSSVIIRADATTVLNPAGAGRNSVRLSSKKEFTTGVTVYNIRHMPQGCGTWPAVWTYGEPWPTLGEVDILEGVNDQQFNHATLHTSPGCTMTGNRAMTGVSLQDDCDVAVNGNAGCGVQIRNPLSYGPPFNANGGGWYAVETTNSFIRVWFWARNDASVPAAVRDGTNEIFTENWGTPSADFPNNSCDIPRFFGRHRITINLTFCGDWAGSVYGQFNCPSTCVDYVNNNPAAFQNAYFDFGWIKHYD
g1199	GH93(42-355)	GH93	GH93	CS pos: 20-21. SHA-LE. Pr: 0.8471	MVSPLVLLAFLFGIVSHSHALESVEPYTNKVIYSPPRDYRVPRTLYARSLLIAEDGDDKNVLLATWENYSPEPPLVWFPVYRSTDLGQTWTQISNITDDVNGWGLRYQPFLYELEEDIGNYPAGTILASGNSIPTDLSQTQIDVYASRDKGYSWEFVSHVALGGEALPNNGLTPVWEPFFLTFEGQLVIYYSDQRDPDHGQKLVHQTTSDLINWGEIVDDVAYEDYDSRPGMTTIAKLPNGQYILTYEFHGALSVSNFAAYYRLSDSPLTFNSAPGYNIKATTGQQTQSSPVVAWTPYGGINGTIVLSANNYAGLFVNTDLAAPGSPWRYISTNGNRGYARDVRVLPSPNQILLVCGGNLGGSSNSVTATVINL
g1226	GH53(21-332)	GH53	N	CS pos: 18-19. VFA-IS. Pr: 0.8916	MLPTVLWAVLLSITRVFAISYRGADISSLPVLEAQGQKYSDAGTTKPFETILASHGANLIRIRIWASDNSDYSLSRGIALAKRGKAAGMAVMVDFHYSDTWADPGKQGIPSGWATNLTALNTAVYDYTSYVIKQFVSNGVTPQYVQIGNEINDGMLWPAGQISRNGYTPLSQLLHSSSAAVRSASSSSKIIVHLANGWNRSAMLSFFQQIFIPGAFSTSDYDVMAFSMYPFYNSGATLSALRSSLTALVSAHGKDVFLVETDWPVSCSATLTEPSIPKSVAGQVTWMQNLVSILNGLSGGHGLGFVYWEPGWIGNGGLGSSCADNLLFSNFDRLLMAYGPSDQMQPKGDDRRSTEATAYLSASLFRFSVEMEWESFGLLYVGSLPGCLHGFILSCPSTS…
g1304	GH35(123-453)	GH35	GH35	CS pos: 18-19. TTA-TL. Pr: 0.5295	MKPSFLLSAAALLGATTATLIKRQSPNDESGKYVLPINSPNFYHGQSNAAVTLDQHSLLLDGKRVMFFSGEFHPFRLPAPELWYDVLQKYSFSVFLLHNHRTIPLDSRSVARQVSVFVINVYYKAAGFNGVSVYWHWGLSAPNADEVNFTYHNDISAFLEIAKEVGVLVIARPGPYVNAETAGGGLPGWLTNVPVLARSNSTEYKDAWYPYISEFAKAVAPYQYPDGPVVAIQSENEFFTSQKLGISGLSEHMQDINDAYVDNGLTKIPTIHNDKNAGAQYSEPGLGKVDLYGWDGYPQGFDCDNPSVWRELSTQHDANHQKLNPAEPLALFEWQGGAFSYWSGPGYDQCYKLINEQFVNVSPLVTFNSTYSDHVLATRYSIRFGVSFEFRLIEVHVAQ…
g1318	N	N	GT22		MASTLTASTIDFPYGVAAFAISLDTTLTLDDAASTSSLLIYGQTYQGTQAELISVLAEKNSILVGPPDIRAESLLRHAKALSTLTAFADINATLDILDDYLAFHTFIGDNAIFPIDWIAWGAIKGSVKLVGLIKNGKHHVHLLRWFSHLDGLPCTQAALTAFISSKAEKARIGSKTASSFALGLEGAVRGKVVTRFPPEPSGYLHIGHAKAAMLNQYFASMYDGKLIIRFDDTNPSKEKTEFEDTILEDLRLLGIEGDAVTHTSDHFDTLYELAVKMVKSGHAYADDTDNTTPANLTCSCPSKQHGNQTRMAFERWHGVASLRRDSTVEENLARFQEMFNGTAEGMGWCIRAKISLDDPNKAMRDPVVYRTNTTTHHRTGGKWKVYPTYDFACPAVDSL…
g1337	CBM67(64-222)	N	CBM67		MVADSGINFASAPIYDYLLPIPTGLLAALAFIASGIVSAVPADVGARDIRIEALDVPDLSLDFAQWIWTGEEGSPGGGAPIGWRGFRKNISHIQTGCPVCVTFAIASDNAYIVYVNGDVVGDNLAKLGSTLAFLQLDVYSVALNPGGANVIAVNSTNIGGPASVVVTGITQYGDGSEEAFVSDYSWLTFSGASPPAGFQDPLFNDAGWTSASQQGFMGSGPWGIPSILPFIGTECQVFT
g1377	N	N	GH146	CS pos: 20-21. IHA-QG. Pr: 0.8475	MRTSIFFALCITLWIQNIHAQGTLGLQNGFTTHQTPEFVLQLVSDSQTAYSLKPVGSDFDFIPSDFMVNRQSNRQYHLGDITIRARVEGASAWTTMDSAANRMPVTKQSVSGSTLAQANLAPTLGSSLLNVTRRWLVEDSVPQLLFDINNPQNESVLIGSIGAPLEFNNIFTGRTAEQTNTRCSLTDPYIGQDAGFVQVTPLLGTLPPLVVIPAKASPLEGWRNLDEPSTEASYWYGSQTFEGLFEWLFHTRAYAENEWAATTPWNEPTSHTLSPGQTRTYGLQFLLADSIPEIETRLVEAGHPVAAGLPGYILPTDQPAKLFLRYSSPVQSISASPSGSLSWKANSDSSTWEGYDITGLKWGQSRLSVAYEDGTVQTVHYFVTHDAVQTVANLGNFLT…
g1386	GH5_9(295-595)	GH5	GH5_9		MSGPADNSRNVAYDPLPLTGEGQGDTLYNAPSPAGTPQMQSTDDFGIPSGAAQPRFLGAALYGEGGSPTGRDSYASSHNTYPSAGARDSEYSSSVYGLTEGQRDTPGQMYAGGYRDDPRDTEYYGGDTGVPMAAVGSRNSRHMEEKRAAYAAPRSKRKVIIGCGILAGILIILAIVIPVYFAVVKPDSKNGSSNGDSDSSSGDDDGDSPASPTSTGTTKGVLITGGSGSKVKLEDGSTFTYQNEFGGYWYHDPEDPFHNGAKAQSWSPALNETFRYGIDKIWGVNLGGWLNIEPTEKDFADIAAAGLNWVRLPIPYWIIEAREDEPFYAKAGWPYFLKAIEWARKYGIRINVDLHALPGSQNGWNHSGRLGTVNFMNGPMGYANAQRSLDYIRIIAEFI…
g1388	GT1(213-521)	GT1	GT1		MIIPESANNSTPAFSAPPEYSLHAGPSTSHYGNSTYKDTLKFGGCSVTAEGLDSTALVTEDGRIDVEVDLRRTLPELPAVTLTAPIDLAQYNAYEKQMPKMNIVVMIVGSRGDVQPYVALAKRLLKDGHRVRIATHASFRSFVTDNEVEFFDIGGDPHDLMSYMVKNPGLIPGIKSLRNGDIKRKRKMLSEMIHGCWRACISPCPETKKHFLADAIISNPPAFAHVHCAEALGIPLLMSFTMPWTTTSSFPHPLVNIKRSNAERRLTNYLSYHLAELLTWQGLGDLINDFRMETLGLEPLTVKSGPGILETLRVPWTYCMSPALVPKPADWPQEIDVTGFYFLDLATNYSPPPDLVQFLANGPPPIYVGFGSVVVDDAAAMTNTIFEATRQAGVRALVS…
g1408	GH13_5(612-946)	GH13	GH13_5	CS pos: 20-21. GHG-KL. Pr: 0.8404	MVFRRVCLLGLLSLQSFGHGKLIYSPADLGQTEYDFVIVGAGTSGSVIANRLSENPDVKVLAIEAGGNNQGNIATVAPFLASSLAGSASDWNYTTVPLEGYNNRTLKFTRGFGLGGSSVINLLTWNKGSIDLWDYWADVTGDDGWSWDAMDTYWRRVSRLVTPADGHDTSGQVDPAAHGVDGEVQTSVPGFPTQLDARVVNASKELGGRFSYTIDHNAGISLGYSYMQSSIGGGERSSSATSYLYPILDRPNLDVLINTRVTKLIQTNANRGKPAFRSISLAGNSEDAPVIVTASKEIVLSAGVIGTPQILQLSGIGSRNDLRALGIKTLVDLPDVGQYLTDHPAVATYYLVNSNDTFDPLLRNSTLFGLELQKWNETRQGRFVNSPANTYAFLRLPND…
g1415	GH92(222-725)	GH92	GH92		MDTDSPGNHAGYDGDPKYNVTGFSQLHQTGTGGQVPLSNFKLFPIHNCSAFEQCLTTIISRKLLRNILPDGTPDDDAFPGYFSTNLSNSIRVELTATRRTALHRYTFPVDSVTPRILLDVTNDGQSSANDIKMLIDPESGRMTGVSQRVEITSRLFLTEIAASGSFADSFGINRYHAYACVDFRGNFERPTEYGPYKINYPDLWGTDIHQHYYTWGYEHGGLVGFPSSEFGTTSILARVGISLISVEQACATAEAEVADWDFDRVVIDSQKQWRETLQRVQVDTEGVDANTTTLLYSSLYRTHITPADYTDENPNWTSAGPYYDAFYCNWDTYRTMFPLMSLHDPVRFADIVRAMIDIHKNEGWLPECREMGTKQFVQGGSHGDPILAEFFVKFEHYAA…
g1452	CE10(94-334)	N	N		MDSKKSTKFADTNLSEKANLVAWITLLPFFLAYKIASKANSSRPWTRICTEGLSRFCTDHLQYNQIQLIQPNTQRIFKSWTKSASIESRIDDLPTGAKLLWLGPKRLDNVLLFAHGGGFLFALSEFCLAFIAHVRSQLEARGIYVGVAILAYKLYPTARYPDQLRDGCAALSFLLTSGVAPSRMHLAGESAGGNIILQILSHILHPHPEVESLPSQDDLRFAGVFLMSPWVSPSGGVVGSDEKDIISSKRLSQWGRLFLQDISQEENGYVDPLKAPEGWYGGLGRIAGRVLMTSGSCESMAPAHVLFRDTCIKEGVEMSFLLDEGGCHDSLIYDFSIRLLHILQKPQIGSLTPKVVDWFAAGLL
g1497	GH13_1(77-380)	N	GH13_1		MACFSSVGFSGNQMFCPAQISLADTLLRQHYANAALGEGVASISAYLPYHSKHSASELDFILPRILTDRFALLDGADLNVIREKLDYIQNAGFTAIWISPVNQNYDGPPTPYGMPYHGYWMADVTQLNAHFGTAEDLHALVDALHQRGMYIMVDIVVNNVMSTSTTPDYSSYLFKDASFYHPYCPIQWGNISSEQNCWLGDDTVHLPDIDTSNPEVIDIYRAWVADFVQEYDLDGLRIDAAKHVDVSFWPQFCNSAGVFCMGEVFGDENVDPVAAYQGPDALASVLNFPMYTALQSAFFIPGDNNVSALVDVLEQSQAKFVDTTVLGNFIENHDVPRWRSKSVDPQSMYNAMTWTFMTDGIPIVYAGQEQYFSGAEDPYNREPLWPSGYKNTVAYNLVS…
g1500	GH18(53-404)	GH18	GH18	CS pos: 18-19. VLA-TQ. Pr: 0.8360	MGFTKLSLLLLSITSVLATQVMHRPDNFKEAPNTFATETNAQTHTIQKRANGKTSFAYFTNWGIYGANFQPTDIVTSTVTHLLYSFADVSPDSGAIKLTDSYADEEKHYPSDSWSETGHNLYGCLKQLYLIKLANRNIKVLLSVGGWTYSQAGHFSFVTSPSSRATFVSNAVTLIEDYGFDGIDIDFEYPTSSALGQGFADLLTELRAAFDKLATSKGDSVPYLLTAAVSAGPENYAHLVVSQMDKALDFWNLMAYDYAGSWLTWADHQANLYGGAKTGVSTDAAVKYFTGAGATASKITMGMPLYGRAFEQTNGIGQPFTGIGPGTIEAGIYSYKVLPLAGAQIFEDTTDVASYSYDSAKKELVSYDTPNIVRIKTQYINDHGLAGSMFWELSTDRTG…
g1505	PL26(14-861)	N	PL26		MSTPQKPHAADGVDLTWVDGTAPSQIPTGTAFGVPWAQGEIDKTTPIALEAGGTSVPIQTWPLAYWPDGSLKWTGHALAADSPLSDTLRLTTNTPAEPSSPVSVSQSDDTITVSTGSFSSDPLVRSLSLDGAVKAEAGNLVVHVQNGPDEPELLGDRPSVVGLNGSVSEVTVEQEGPVRAVIKVTGKYSGDGHDDFLPFTVRFYVSAGSTSLRIVHFFVYDGDQTKDFIKGLGLSFTVPLSDQLHDRHIRFASTEGGIWGEAVRTVSGLRRDATAAVLTPQFEGTATPALSAWPANVSSGINDLPVWQDFTLDQLSPAHFTVKKRSSGGRDSSFLDHAGFGHRASGLGYVGGANAGGALFALKEFWQGAPRGLDIRNAGGDTASVTLWAYSPRAHAIDM…
g1510	GH7(20-454)	GH7	GH7	CS pos: 18-19. AIA-QQ. Pr: 0.5573	MFNKAALVVSALLSVAIAQQVGTQETERHPSLSIQQCSAGGSCTTQSRSVVLDSNWRWLHTTSGYTNCYTGNTWNSSICSSPSACASGCALDGAKYSETYGITTSGNALTLKFVTSSQQKNIGSRVYLMESDSSYQMFNLKNQEFTFDVDVSKLPCGLNGALYFVEMDKDGGMSKHSTNKAGAKYGTGYCDAQCPHDIKFINGEANTLGWEASPNDSNAGSGQYGACCSEMDIWEANSISSAYTPHVCTSTGLTRCQGTDCGDGDERYESICDKDGCDFNSWRQGDQSFYGPGKTVNTNSKFTVVTQFITTDGTANGALKEIRRIYVQNGKVIQNSYSTFDGLTQYNSISDEFCNAQKNVFEDNHSFEERGGMKKMGDVFSKGMVLVLSLWDDHAVNML…
g1530	PL3_2(39-161)	N	N	CS pos: 18-19. VSA-NP. Pr: 0.8741	MISQTILALALAAATVSANPTGVHLEGRAATNVFPTPPTTSHLSAPIRVLAGQTFTPPQAYTRYDRGSGACSEQAEGGDADAVFLLEEGATLSRVVIEKDQAEGIHCLGSCTIEYVFFEDVCEDAITIKQSSGTSRINYGGAKKASDKVVQHNGGGTVIINSV
g1540	N	GH16	GH16		MASAPRRFPSEQSKTSLLPRRDDDAYNTTRSSNSASSLSEKYSLAPDPASWGSSLHMNEREPDDWLHNPDPRRDKDFDQGGSVFTARGFANLGCIGLLTIAIVTLFAGYPIITYFSTDELSRNGGFNLGGINASGQIPSIGNWGLIDQDTPEDAYTKVSYESGDEMQLVFSDEFNTEGRTFYPGEDPYWEAVDLHYWGTNNLEWYDPSAIITEGGSLKITLSDTPTRGLDYKGGMMSSWNKFCFTGGLIEVSVVLPGANNIAGLWPAVWTMGNLGRAGYGGSLEGTWPYSYDACDVGTVQNQTINGQPRLATVDGDDKYDGVLSFLPGQKLSRCTCPGESHPGPMHADGTFVGRAAPEIDVFEAQVANGVGDVSQSCQWAPFNYAYQWFNTTDNLIIYD…
g1577	AA3_3(20-615)	AA3	AA3_3		MSPYFDIIFAGANFSSHQTGGTTACVVAGRLIEADPQLKILIVEPGPHIKGVETHVQPARFFSNLTSQTTLAWYVAKPNPALDGRQVVVPTGKCVGGGSAVNFMMYTRAAASDYDDWEKLGNPGWGAKDLIPLAEKLENYEPFEDERASHGSSGPVHVSPGGHTTTIGSDFLEMAASYDKDRTFAQDINDFTTCNAYGRWAKYIGHQTGERSDAAHSYIYDKPDSENLVIITGKRVNRVLFEDGTATGVECVDDKGPSSDIEVFNASKLVVLSAGAFGSPTILERSGIGASKTLNAYGIPQLVDLPGVGENYNDHNLYLPTFFVDEATSDSMTDLLRDVDHESVARRDSINSAHSLPHSSSIDHLALWKETRRGLVAHNIDAGIKIRPTAQEVENLGPE…
g1623	N	N	GT31		MDSKYELEAFFAEQDERMTVSETDLRDFVARKASPIERVVPQQQGSSLHLNKISEGPSEISPVLSKDSRQDATKKRHVEPTPAMSTSTSRAQGTDTVPSLNAAGARSSKRIGENVLAGPSRVKKQRKTIEDRERASDVEAEPKKLTDRIIIQEPKVAPKKTSPLNETETVEPDPKSSRVVKKKKTAAKQGDRVKTGTAQKPLAVEVPLAGSRYAQVLAKSGSSFLQDEIATRIAKLGQSSKPQPRVLKGAKRETLEGIEVSVSSASSAVSSRVSSPDLQISGKESSKSRPIAVKKSTTSLTKKKNAQSDRITPEKYALRILEQRRLEQENPPVKTKKPVPQFLRGKNIYYCGGEYENASDRTKKRLLLLDKFGANLQPKFDPECTTQIVVDSNVSLATL…
g1644	GH43_26(19-305)	N	N	CS pos: 18-19. AEA-FT. Pr: 0.8823	MWFFTPLVLACHLFSAEAFTNPIKSSDGSDPFMVFHEGYYYLTSTTWTNIQITRGATIDELKRATPKVVWQDSTASRCCNLWAPEIHWYNNSWYIYYTAGTAGTFDNQHTHVLKGSSNNIWQSTWSYAGRIVIPNRDVWAIDSTLLFLESTYMVYSSWDGPDQCLYISKMNNATSVGNTVKISAPTYSWERVGANVNEGAAALYHGGRTFIAYSASNCAGTGYKLGLLELTGSDPLNPSAWKKYPEPVFTNANGNYQPGHNGFFTSKDGSQIWNVYHANTATPGTCDGARYTSVQIVNWNSDGTPNFGQPLALGTQISEPS
g1646	GT39(61-302)	GT39	GT39		MPSPTSSSSAGQLRQRKHLVHIDDTQEDEQAAHVYNEPRTPHPIERILDTDKASIITVAVLTTLAFALRLFKLNQPDQVVFDEVHFGKFASYYILRTYYFDVHPPFAKLLFGLAGWFVGFDGLFQFENIGDSYTTNHVPYIGMRALPAILGSLTIPVVYAIMKQTGHSTVIAAFSASSHLVDNAHIAQSRLILLDATLIFFMSLTIYSYIRFQKLRYWEFSAEWWVWLILTGVFMACTWGSKVNGILTVATIGVATLIDLWDLLDYKKGNSMEHFWRHFRARTVGFIIVPFVIYLSFFYIHFAVLTQSGPGDSFMSPAFQETLSGNEMLLNSHEIRYFDTVTMRHKETKVFLHSHVERYPLKYDDGRISSQGQQVTGYGHEDTNNHWQIIPTKSLPESG…
g1652	N	N	GH3		MSMTDVPSLTTTQHFLSISADFVPSTTLQRHNYEPSDDASSTAPNSGRQAMAPLPPLDGYYPTSPKNNMDTNRPPSINSQQTDYPDTSPSVGPKQRAGVDPKAPFWASYNTEAAKSDRETTRGWTSSLDFLLIVTGLFSAIVTGFLVMDMSPETSDVYANGMVQFLVATTKHHLLDAVDIPPSLQRELYNLFSRPPPPSAIATAIVTFWSTSLTCTLTIFVYAFYVKFWLREYQRDLRNGSMFDCAQRRQARWDAMLKFKVEEWILFLPLLMHMAVICFVAALILKLWTYHRFAAYVQLVLSVLVFIVYAWLTIWPAFKEMCPYHNTAMVMVPRIFCGLWGYFAAGGRKIQLSILRRIPAPLLKWMVPEELDLEKGSVEAESTLPLYQAHPRTDREEQF…
g1724	AA6(53-248)	AA6	N		MCFPSKKQKANFEDDDKKPASKAKPASSPIPPTNSQPLTTTSSPTQTTKMAPKVAIVIYSMYGHIAKLAEAELEGIKAAGGDAKIFQIPETLPQNVLDLMHAPPKPAYPIIDADTLATFDAFIIGIPTRYGNFPGQWKAFWDTTGGLWAKGSLAGKYVGLFVSTASLGGGQESTAIAAQSTFAHHGIIYVPLGYSQTFGQLTNLTEVHGGSPWGAGTFAGPDGSRQPSPLELEIATIQGKQFYGVVSKAF
g1729	GH76(54-343)	GH76	N	CS pos: 22-23. VTG-RC. Pr: 0.3265	MPPYLKTFLVVTAASALNLVTGRCDKYLEPAKEAAAKLQSTYFEPGGTYRNQFVWISAVNDWHLRRLDALTNERTHESIINTVYLQDMDHLHSGVSFDDVQWVAIDYMSAGNAGEAKKYYEIAVRAKDDANGYCKGGLWWNGPRDYKNAITNELYMAMSGLMYEKTQEPQYLKELEDIWKWFKSSDMKGENGLYNDGLTRAGDKAGECKNNQQTQWTYNQGVVLVGLGYLYKFKQDQDAVKSAWEIMNAIQLHLTNKDGALQESCDSNANNACNADQQSFKGILVGYMTWFLSITGKDDGDRYSTFIKQQGDKVLENAKGGDGFYSNVWTKEKVEGAVQFTGPSQGSALGALVAAASQNC
g1730	GH76(48-330)	GH76	N	CS pos: 18-19. VNC-LC. Pr: 0.5011	MPRSLAALVLLGPTLVNCLCQKYVDAAVSAAANLQSRYFGADGTYGNQAIWISAVDDWHLQRLDALTGQSTYSSVIDTVYHGNEDYLENGGSYDDVQWVSIDYLLSGNVEMGKKYYDIASTAVDSAYCGGGLFWSGARDYKNAITNELYMATSGYLYEKTQDDQYLTNLKNTWAWLAGTGMKGANGLFNDGLTKDGTCANNGQTQWTYNQGVVLVGLGYLNKYAGSQEAVATAWEIMNAIIENLTIDSGLRESCESDTQMLCNSDQQSFKGILVEYMAWFLSITGQDDGTKYSDFIKLQADKVLANARDADGFYSNLWYATNKGAATWTGPSQGAALGALVAAAAQNC
g1731	AA6(4-199)	AA6	N		MAPKVAIVIYSMYGHIAKLAEAELEGIKAAGGEAKIFQIPETLPQNVLDLLHAPAKPDYPIIDPVTLATYDAFVLGIPTRFGNFPAQWKAFWDSTGGLWAQGALSGKYVGAFYSTAGLGGGQESTAIAVQSTFAHHGMIYVPFGNTPAAAKLFNVPELRGGSPWGAGTFAGSDGSRQPSPLELEIATLQGKQFYGVVSKAF
g1753	GT2_Chitin_synth_1(196-355)	GT2	GT2		MAYRQPNSDQYHSQPAPNYRPQDTYNNQHTTYGNTGVVDYPPHQNSYDDYDNQSNWETKSAKSFQSGYGGSQVHLNPYEMNQPIPPVPDMPYQQNYPPPARPGMYHHPSSAGYSVAREKMMKRRSVRQVELFQGNLVLDVDVPTHIVPASHANEEEMTKMRYTAATCDPDDFLKSKYSLRPYLYGRHTELFIVMTMYNEDEILFTKTMNAVIKNVAHLCSRSKSKMWGPQGWTKVVVCVVSDGRNKVNKRTLQVLSLMGVYQDGIAKDSVGGKDVTAHIFEYTSSVIVTETGEVAQGTCPVQVLFCLKEQNKKKLNSHRWFFNAFGPLIKPNVCILLDVGTKPTGTSIYELWKCFDKHKHVGGACGEICVDVGRGCSLLLTSPLAASQNFEYKISNILD…
g1769	AA1_1(171-484)	AA1	AA1_1		MAAYDALRGKDPNSPIGARHHYGDVSEELARRRRAYERQQSYNRGAKSPRYEWDSNPEERWKANMMIAFGILALVAGIAPSIFILPYRMHKNHANAVRNYSNAREEALEDANARRQGRKPHNHGGGDAVLDLQTMFPIAFGFALSLSARLAFAAIGPVTDLRIQNAHLELDGYDRSGVFADGIFPGPLIIGNKGDDFKINVINELTDEAMFKTTSIHWHGLLQKGTNWADGPSFINQCPIAPGNSFSYDFSAADQAGTFWYHSHLSTQYCDGLRGPFVVYDPEDPHGHRYDVDDESTVITLSDWYHKLAPQQGAVPLPQSTLINGRGRFPQGPSNDLAVINVVQGTRYRFRLISMSCAPNWVFSIDNHILEVIEADGINTQPLLVDSIQIFAGQRYSFV…
g1785	GH47(65-584)	GH47	GH47		MQSANLNRYLRSMRQKAAIRNIFYAGVFLLTVWGLYSSLSPRNYLQFPRPALLKWDERAEQVKQAFLHAYHGYERLAAPHDEVKPISGGYKDNFNGWGVTVFDSLDTMLLMRTEEEYQRARTIVANTKFDLPNHKFVPYFETIIRYLGGLLSAYALTKDALFLARADELAEKLEPVFNTPSGLPLYGVNPTNGEVVGPEIGILAEIASLQLEYSYLAKLTGKKLYFDHVNNVIRTFEKADLHETGGMLPIGWNLSNGRPANSRLSPGAQADSAHEYLLKQYLLTAKTDKASLAMYLRTTTHIISNLLYVSPTRHFLYVTSTTGSSFEGRAPPSDVMEHLSCFLPGLLALGVHTLPFDDLDSLGLDLETLASQDTFGFAGEGYRRLKGYKLKDLHMWAAE…
g1794	N	N	GT4		MLLPNQLLSTFSTSHSIPVRSTSPAASEVSSILESRISGASLGGNVEETGRVLSVGDGIGRVWGLRNVQADEMVEFSSGVRGMCLNLEADNVGVSIFGNDRLIKEGDTVKRTGQIVDVPVGPGLLGRVVDALGDPIDGKGPIDAAERRRASLKAPGILPRRSVNQPMMTGLKPIDAMVPIGRGQRELIIGDRQTGKTAVAIDTILNQKRLNDGNDESKKLYCVYVAVGQKRSTVAQLVKTLEENDAMKYTIIVAATASEAAPLQYLAPFSGCAMGEWFRDNGKHALIIYDDLSKQAVAYRQMSLLLRRPPGREAYPGDVFYLHSRLLERAAKMSDKFGGGSLTALPIIETQGGDVSAYIPTNVISITDGQIFLEAELFFRGVRPAINVGLSVSRVGSAA…
g1795	GH71(35-431)	GH71	GH71	CS pos: 23-24. SEA-RS. Pr: 0.8220	MFYSVWSSFFPIILLFFYSTSEARSLSKRDLRPAVVGHFMVGNTYPYATWDWIRGTRLFFLIFASNMRPKDMRLASSKGLDAFALNLGVDSWQPDRIANAFEAADICSNTYGITFKLFLSFDMTSLPCSDPGHAQLLQRYVDQYSHRSSYFQYDNLPVISTFAGERCSFGQSNLNDAWNFAIKSPFPASRFIPSFFVDPSQFSSLPVMDGAFNWNSGWPQEDNDIDFTRDDQYISELGGRIYMAAVSPWFFTHYGPETYNKNWIYRSDDWLFAERWEQLIDQRARVDIVQVISWNDYGESHYVGPIEGAQPNSEAWTTGYDHQGWLDLMQYYISAYVTGRYPVISRDRAFVWGRLAPAGADTGDRVGKPYRWQYAEDAAWGIVHLASPADVTLSCGPST…
g1823	GH47(84-575)	GH47	GH47		MMASSLLPAPVSFSDVKSYASLRRPRYILLGILIAAFLWFSFDLFHPPPPFYTVHHHHPHWPPPPPLSDSNTTNSWRAERIRNAFIHTYENYLEHAFPNDELRPLTGRNVSTLNGWGVTMFDSLDTIYIMNLPQYMDHAVSYLTNAPPSLFFLKVNQFAPFFETIIRYLGGLLSAYALSAHPIFLERADELGTMLLPAMGTASGLPTYSVNTFTGKTGNGWMAGTLWAEALSCQMEFKYLAHLTNKHEYFDKVENIMRLMEAANNNAHPEEPPKPGSGNLPPKHMLEKGVFPTLWDAVSGTPKNRLFSAGAFADSAHEYLLKQYLLTAKSEPRALSLYLDAVDAILNRLTYYSSLRDIIYVTDIDSGSGKPSHIFEHLTCFLPGMLKLGAHSLDLPPEK…
g1874	GH105(343-697)	N	N	CS pos: 16-17. VLS-VP. Pr: 0.4630	MRAFFTLALFVSSVLSVPSAPSKRQDTNTYCGQWDTVDLEDYILYINQWGKQNAQSGRSCASITSVTGTEVAWTTTWTWTGGEGVKSYTNINAKKGIDRQLSALSSIKAKWTWAQTTGSNTVTNIAYDLFTSSTAGGSDEYEIMIWLGNVNAGPISYTYNAQGNPTPIATGLSFAGKTWNLFYGNNGVNYVYSFLTADGSSITNFSGDLKVFFNYLTSKQHLNASQYLVTAQGGTEATQGSATLKRSAGRPGPCFFPSTFVFMLQRKIEITVLATLSPLLRMDALTHHFVAQLDMFLATISTLTIFVAGAVCVQARPESYAVWAADSAIARKQGNGYKDDLATTTVSYEHGELQWGLRLLYEATGNQTYYDYILAAANVIVNKDGNIVGSDYKVTDYSQ…
g1896	GH51(277-745)	GH51	GH51		MVQYLQLAVHGMDEHYIPSDVLPPNITHFQLRDACFDEFVLFYIARRFCSVDCWHVTVTDPTVDVVTLKRESILFVRPQKRMMRIPSILTSIVFLGASWVYAALNVTVNSAGHVQPQTLXLTDGLMFESGDGGLYAELLQNRAFQTVQPGASNSLNAWSRLGSSQISVVAADPPVSAALPNALAVTAPTNATGEIGFSNSGFWGINVKSEWTYTGSFYYRIPGGVTGSFQVALRSADNIVEFASASVPFEATSEWTKAEFSFQPTSSANDINNIFVVSLDGEAVKGTTLQFALFSLFPPTFMGRKNGMRIDLSETLADMKPTIFRWPGGNNLEGSVVANRWKWFNTLGDLLERPGRPGDWSYPNTDGLGIFEYLQWVEDMAMESIMGVYAGKSREVVFG…
g1927	GH152(26-172)	N	N	CS pos: 19-20. SSA-FT. Pr: 0.7214	MKLSLLLTAFASMVASSSAFTIRFQNNCGYTVWPAIGKAPNGFPDTSVSYGTRLASKASASFSINDREVGIRAWGRTGCDSNGANCATGRCNGGLVCNDAGITSAVVLSEYGWGDYGQWGGQRISWNLSKVSSSVNINTRLSSSDGQSVACTTSSCPPDQAYNVDSDHQAVRNSPLGSTFTHTFC
g1971	AA9(14-193)	AA9	N		MNDMIIVALLAYTTPVPRRIVRQIPGNGPVEDLSLIDIQCNGYTAEGYATATAPLYAKVAAGSEVGLKWTTWPDSHAGPIITYMAKVPASQAVWFKVTESGKNADRKWAATDLLTAANSIATFKIPVSLQSGQYIIRHEIIVLHGAFNYPGAQVYPSCIQVEVTGSGTKLPTPFVSFPGAYNASTPGIFIAPYQIPGPAA
g1978	AA7(120-335)	N	N	CS pos: 18-19. VSA-QR. Pr: 0.9074	MLGYILSSIVLGALSVSAQRCKCLPGDDCFPSADEWQAFADTLSQPLLSDQRPLGAVCYQESEAFDAALCAQYREGLSTSFIVEHPNTLMFGSNEGLITETEVQSCPLDASVSVNGTCFQGRVPSYLITATTVEDIQNTIVFATEHDLHLVVRNTGHEFIGRAFGIGAVELYTHNFQGIEFSDSFVPQGAPADTVGQDAITIGSGVSWGDVYKAANDNGRTVVGGWSVEGSVGAGAGWPLGGGHSILAPYYGLGVDNLLEINVVLPNASYETINEYQNPDLWWALRGGGGPNFGVVTSVTYKTHPNPVYTVAFFVATANSTDSFVNLLTTFMRFHNPISDAGWAGTYVYFDNTLYLTFSSQGPPESNPVANSTFEEFFTEARSLPALDITQAFSVQYPN…
g1983	AA9(7-214)	AA9	N	CS pos: 17-18. AVG-HY. Pr: 0.8246	MIYAFLASLLVLPLAVGHYTFPGLIFNGQTSADWQYVRTTANHWSNGPVTDVKSAAIRCYELDSTSAGSAGIATVQAGSTVGFHANSNIYHPGYFSAYLSTASPSANSTNAGLGNTWFKIWEKTPTVSGSQLAFDTSLTDITFTIPKSTPSGQYLLRGEHIALHGASGFAGAQFYIGCAQINIVNGGSGSPSPLVSFPGAYTGNEPGIMLNIYNLPGGYSGYTAPGPAVWRG
g1990	GH5_22(47-340)	GH5	GH5_22		MSLLKVSGTKIVNEKGEEVILRGAGLGGWMNMENFISGYPGCEHQIRETLAETIGQEKSELFFDKFLEYFFVEEDAKFFASLGLNCIRLPFNYRHFEDDMNPRVLKASGFKHLDRVIDLCAQYNIYTILDLHTVPGGQNTDWHADHGTHIANFWNHKDFQDRTNWLWEELAAHYKGNKWIAGYNPINEPTDPKHTRVIAFYDRVYNTVRNIDPDHAIFFDGNTFASDFSHFGDSHKKWENTAYSIHDYSVFGFPAAPEAYTGTELQQHRLRRSYEKKREWMDERGLCVWNGEWGPVYARKQYEGEKTDEINEVRYRVLKDQLDIYNKDRLSWSIWLYKDIGFQGMVYIDPKTPYMTLFSDFLAKKHRLAIDAWGADDSAVKGVYEPLVKHVLEEVDTKY…
g2002	N	N	GH37		MSRRTHTQPTAPTTGTPRPPRPAAGNNPSSSRRALPSTGSIYNYNIRVCFQLTTFESSVEYLASPRKTISLLGDYILSDTSRSLKVLHYGHEIENPSRGFLAIVWADPEHHIVSDQYNHLLSRALARRSPPSLDEIWLDAESYLWGVFSAPAVSVQIMRLKRLNDMERVIPMIADWTSRSRACEGYRDHWFNTTINVNDDEFIVVTGWDSIEAQWNARSGGDYASGLQRIQQLSENSTRRPKRPRTTKHAEYSLHSPFNALNRAYAACHSSRALTSDHAVCRRRHYRTLSSAKPPQYQQLSSNMNPASSSTTPAPASRPASSHPTPAGNASNNKQPEWKSQLRPPPKDLRPQTEDVTATKGTEFEDMFLRRELLMGIYEAGFERPSPIQEEAIPVALTG…
g2009	GH35(29-354)	GH35	GH35		MDLTKNNLLSRDETFGDGAVSFDNYSLSLYGQRVFIHAGEFHTYRLPVPSLWPDILQKIKASGFNTISIYTHWYAINPAPGVIDFDGYRALKPLYEACLDAGIWVIIRPGPYINAETSAGGMAHWVTTEVAGKLRTNATDWRESYQQYIRGVIDETVPYQITRGGPVIAVQIDNEYNQTFDGGVGGEYYDDIEDIYRDSDIVVPWTYNNAGMVGNFINGTGAVDLYGVDDYPQRYDCGNPYAWKEVKQVYREFHLQVNPSQPFFFPEFQAGSPNAWGPGSADFEGCQILTGPDWMNVVYKNLWAMNSKLLSYYMVYGGTSWGAIPFHGIYTSYDWGAAISENRTLSPKYEEMKREGYFIRSSPDFYKTEWMGDSNATHSPYLGDILSNPKIFVTLLENP…
g2053	GH28(81-246)	N	N	CS pos: 26-27. ANA-GS. Pr: 0.7927	MTPRFSGKFLSLLSLLPSFPFLCANAGSIGNTCHVSASIDASDDAPAILEAFALCGNGGSILLNDPLYHIESVMQTTDLVDAYVELTGTMLIWSTERSTDLELEYLNMTTAWKIGGKNVTFDGKGVGTLDWNGQLWYDLTKGVSNLPGRPISLVIANTTSSHFTGLRFVQSRFWTMALTHTQDVLLNNIYVNSTSNDSNPARNTDGVDTFRNWTVIGGDDNISMKANSTNIHIHDCTFHGGLGVAI
g2062	GH18(23-231)	N	N		GAWDKAYEWTSMTAGERSALKAQYAAAGIKLTVSLFGSSDVPTTVNADPVQTAQTMAAWVKQYSLDGVDVDYEDFGAFAQGTAENWLISFTTELRRQLPQGDYIITHAPVAPWFTPSLYSGGGYLKVHQAVGNLIDWYNVQFYNQGTSEYTTCNGLLNTSSGTWPKTALFEIAASGVPLSKLVIGKPATTADATNGWVSASDLAVCLQTANNRGWNGGAMVWQYPNADENWIRTVRSLSWPV
g2063	GH18(80-276)	N	N	CS pos: 21-22. AHT-SP. Pr: 0.8422	MFLRLRAIACALICLFGLAHTSPLNDTQLLNARSDLTVPGPPHFVIYGDRYVQGLTGPPPVNKIKGYNVFALSFLLLEGAWDKAYEWTTLSAKERSDVKTQYHAAGVKLIVSVFGSTDIPTTTGANPIATADMVATWVKTYDLDGVDVDYEDYEAMKHYNGQAEAWLISFTRQLRVHLPQGSYILSHAPVAPWFSKNQEIFKGGAYRTVHKEVGHLIDWYNVQFYNQGITEYTTCDSLLWNSVGEWPGTSLFEIAYSGIPWEKLVMGKPADAGSAANGFMSSVKLATCIQEAQRIGWNGGVMVWQYPDASSSWIQSIRSSSFPM
g2066	GH28(60-376)	GH28	GH28		MYSRILSHNICTIQPNLNGQDDTPSILDAFRRCGNGGRVNFLNATYHIDSVMNTTGLMNCVVDVQGTLLWSTNISYWLSNSYEIGYQNQSTAWLLGGDSITLQGHRYGTLDGNGQTWYDFNGNRSNLIGRPHALTITKTKNSLIKGMRFVQPQMWTMPIMNSRNVTLQDIYVNATSSSYNTTGNTDGANTVYADNITFRRWTIDNGDDGIALKANSTNILIEDSAFYHGHGVALGSIGQFPDQYERIENVTVRNVDYFNTGKSIYVKTWTGKQKGYPPNGGGGGKGYVRNIVLQNATLHNTRSIFAIDQCISYIGDMDDCDTSHLSLSNIDFQNVRGVAKTSGVFQCSAATPCRNVSLANISVVDPNGKAFDSYQCIPDNLNEASGIACSGPPQWEYIK…
g2085	N	N	GH3		MTPPSLLFAEDSTPAPHPSASTKGLQNSSSELPPGVRSVKPPGTPSPWYGSNLYGRAPSILGDTHTKSPYHATRPSPASGYTPENQPNLQPQYMSVTPESPFWEMYNAEATKTDKDVTQGWTSGLDVLLIITGLFSSIVTGFLVMEINPDPSEAQALVMARYLVAKARFTTSEAANLSPAAQREIFEYLSAPPEPSARRETIVACWSVSLTCTLCIVIYAFYIKFWLREYERDMKNGSAFEFAQRRQARWAALVRWKVEAWISFLPVLMLVSVGLFIAGLAMKLWVSYNKAAIAVISVSGTLLSVYFALSILPWFHKSCPYHNTALVLIPKMFAGIGSFLENCGKRVFTGLASLKRRANSKAKGDWDIEKSLPVLPLHFAPARVEEEDKYITTNKDRLT…
g2101	GH55(178-913)	GH55	GH55		MSESATSKPRVTTRPATPKDIPTILGFVIELAEYEKERDKALATPELMYEALFSDKKVAYAIIAEVEADGQKSVGFALYFYNFSTWIGKKGIYLEDLYVTPSHRSFGVGRALFRALAEVAINEDCGRIDWSVLKWNTPSIGFYESALGASRMDEWVGMRMGGARQTTTTSKHTGRSMAPSRHMFWMEAIKHQGTSPFNPNPAEYQVFRNVKDFGAKGDGKTDDSDAINLAISSGNRCGGGDCRSSTVTPAVVYFPQGVYLLKKSIIAYYYTQLIGDPKNRPTLLAHSSFNDMAVIDADPYIPGGGGKQWYTNQNNFFRSVRNFEIDLRQVPPERSQGTGIHWQVAQATSLINIVFHMSSAPGTAHQGIWMENGSGGFIGDLVFNGGKFGIWAGNQQFTV…
g2103	GH55(39-762)	GH55	GH55	CS pos: 22-23. VSS-IG. Pr: 0.4250	MAPSPWSLFFFALSCLFTLVSSIGTSCSTPLGGGTASPSDPFWLQSMTRRGTAAFNSNPSGYQVFRNVKDYGAKGDGVTDDTAAINAAVSEGGRCGRGCPSTTVSPAIVYFPAGTYLVSKPIIAFYYTQLIGDAKHLPTLLASASFTGMAVIVIEALSNAYYSFRSVRNFIIDLRRMPSTASATGIHWQVSQATSLMNIVFEMSTASGTSHQGIWMENGSGGYMGDMIFNGGKYGMWVGNQQFTVRNITINNANTAVYALWNWGWTFQRVTINNCQVGFDLATGGTSQANQSVGAEAIIDAVVTNTPVFVRSSTATNSLAGSLVLNNIQLNNVPVAVGIAGGAVVLNGGTTNIASWGQGNVYRGTNAAGTFTKGNIVAANKPSVLLEGGRIFGRSHPQY…
g2107	CE10(96-314)	N	N		MPATRYAEVNIPFLLLKIILLVSSVVYRVGSLDFASKSSNKPFMRRLAECVARVATDTLCYSEIQFVCGRPLYIYKKWARRERQPATIDDLGEGALLVWLGPKPEKLHNVILQFPGGGYVNPLEPGNLNFMRQAQLHIGKRETEVGVAVLLYKLRPEGRFPTQLRDAKLALDFLLAQDVQPGNIQLIGDSSGAHLIIQLLSHMMHPLPAMYVDPIPPMKFRSIILFSPWVSLRGDVGSDAFLRNDLHDTISAATYCSWGREYMAEVPLNLEAFGDPVAAPLGWFSGLDKLADRVLITAGEKECLVDAIIFLYERHLKDSHPDIQLWEQEDGLHVDFVLDFVFTPYHVSKMTHTIFEFLAEGFFN
g2126	AA3(418-1010)	AA3	N		MLLVRQSLTRVAARQSTLAATRSPARNMATLREIELRLKSVRNIQKITGTMKMIASAGLAKAQRTMAQAKKYGEANAEVFNQSADDISNDKKLFLVISSDKGLCGGIHSSVTKATRKAFTGAVDSPIPGVVVDSDSPIIIIGDKAKAQLSRVHPQNIHLTFNQIGRDVPTFADAASVADLVLTSGVEYDSVVLIYNRFASAISYESTALVIKGEKALANSENFKAYEMEDDFTKDLAQFSLANAIYSALVEGHASEISARRNAMDNASKNATDMIGSLQMQYNRGRQAAITNELVDIITGTIIILLTDCVLIILQVLVLCERASGHDTLMEEKLEXLRPSSIQTSTIITNYPVVDITHLLLFHDAQALVSLRAYELSALTCASTSMEEKLSDAFDKMEI…
g2179	CE4(35-153)	N	N	CS pos: 18-19. ASA-LP. Pr: 0.3936	MLSVTTLTTLALAALASALPSRRQAGNIVFSCSVPNTAAITFDDGPFQWTREIVDVLDSKNAKGTFFVNGNNYGCIYGESQAGDIKYAFDKGHQLASHTWGHRNLAQLSREEIASEMSGVDVALQKIIGASPTMMRPPFGSINDLVLQVAAELDETVVIWDFDSGDSAGVPGYQSNAMYDGLVGGHPGSILTLNHETYESTVREVLPHAIDALQGAGYRLVTVAECLVVGAGVIGLTTAIRLLESNRHVIMLAKDLPEDPLIATYASPCAGAHHLSFASDDDLVQRKVDRRTFDVMWEQIHSPKPGEEDEGAALMKLTQTEFYATPGEKHIQFFEELPDFKILEPPPHSLHSVSFTSMTMDTGPYLVALVKRFVKLGGRLERADLSSLRSILDHPLAGE…
g2184	CE4(36-144)	CE4	CE4	CS pos: 19-20. VKA-AP. Pr: 0.9072	MLFSAIALSVLACVATVKAAPAIEKRQQAQVIYGCTQPNTVALTFDDGPYXYDISNALTSRGAKGTFFFNQCIYDQGAMDQIKYAYNAGHQVASHTWGHKDLTSLTWDQIHDEMWRVELALQRIVGVQPAFMRPPYGNYDDEVLYASYIRGQKVVIWDFDSGDSVGASAAESKERYRTTSLTRPSTLLALNHETIESTAHDVLPYAIDRLQSAGYRLVTVAECLGEQPYQWTGAPQTPTSDWRC
g2185	CE4(36-191)	CE4+CBM18	N	CS pos: 24-25. SLA-AL. Pr: 0.3994	MLLSTLAFSLAILTVPTVSLPSLAALPSLVTSCTVPNTAALTFDDGPYIYSQNISDTLTAKGAKGTFFLSQFGLYPSTVQPINLSTDGKLNKCIYDTDSMERVRHAYAAGHQIASHGWSHTSLPSLSADQGKFPVLRFLDGHLHSTVELELSRVDEALKRIAGVVPAFVRPPYGNTNDQVLSITAARGQTAVNWNLDAEDWNGLSAAQTQAKYDAFISQKGSGLIALNHESYDTTAFNVLPYVIDRLQEAGYDLVTVAECLGSTPYKSEGAPGTPDGTWTC
g2192	GT49(104-398)	GT49	GT49		MNPKAAFIRASEVLLAALFCYAVSAIVYTTNHFILEPFQGRLLDLSSPKQPVEPVRPKFTNWTLYQQPKSASTRSERYTEQPYVIPESLFMSKAFSTSFTPSEIIPYYYRASTEPEAEDITITTLITSNRFHVFAGLSTTGPISVTMHIKNETNHVQDTLDALRSLYSSSPHMTQFVDVHLVIDSFDRQFNTWRNIARLFARTDFVMMLDVDFYLCTDFRSAIRKSKPILQKLRDGNAAFVIPAFEYPMHSDGSDYTKFPNDKKALLPLVKSKKISMFHDSWQAGHNSTDYPRFYAAQAGEVYKVTRYQSAYEPYVVSRADSPPWCDERFVGYGGNKAACLYEMYLSGINFYVLADHFLIHQNHVYQKVIRKNERRFNRRLYNDFREEACLRYLKAFHE…
g2247	GH74(78-192)	GH74	GH74	CS pos: 21-22. CAA-TP. Pr: 0.4232	MARLAAFSIVAAVLLPVVCAATPQAYSWKNVKIGGGGGFVPGIVFNPKEKGLAYARTDIGGAYKLNADDTWTPLLDYADDARWNYWGVDALATDPVDPNRLYLATGMYTNSWDPNNGNILVSTDRGKTFTPSALPFKIGGNMPGRGIGERLVVDPNLNSVLYFGARSGNGLFKSTDYGKTWAKVANFPSAGTYIADPSDTNGYNSDIVGIAWVTFDSTSGTSGAATPRIFVGVANKDSNSIFVSTNAGSTWSAVSGQPTTYLPHKGTISPTDKTLYISYSDGAGPYDGGAGAVYKYSITNSTWTDITPVTGSNLYFGFGGLSIDVQKPGTVMVAALNSWWPDGQIFRSTNSGASWTPLWGYSSTGAYEKYYSYSNSLAPWLGPNYPATEQGTLQIGWMM…
g2251	N	N	GT30		MATGDIGLIGLAVMGQNLILNMNDKGFNVVAYNRTIEKVDAFLANEAKGTNVQGAHSIEELCSKLKKPRKIILLVKAGAAVDSFISQLVPFLEAGDIIIDGGNSHYPDSNRRTKELEAKGLLFVGSGVSGGEEGARYGPSLMPGGSKAAWPAIKEIFQKTAAQAYGEPCCDWVGEEGAGHYVKMVHNGIEYGDMQLISEAYDILKRGLGLEEDEIADIILKWNKGVLDSFLIDITANILKFKDDDGEPVVTKILDKAGQKGTGKWTAIAALDAGTPVTLIGEAVFARCLSSIKEERVRASKIISGPQKEPFRGDKQLFIDDLEQALYASKIISYTQGFMLMRETAKEMNWNLNYAGIASMWRGGCIIKSVFLKDITSAYNKNPALESLLFDDFFNKAVH…
g2278	GH105(112-291)	N	N		MIDLGGVPLAAPFDAGFSMQGVVEHAARLPSHSWEYGATSIAFLELFSPELSEYSPSPFQNRPVDPTTIPALQAGLEWITLGSPPNSLADGDGATGDPASLGPVAYLIGQTNSDYATATKEQLEYLITGAPRSSDGTISHRADVVELWADFVFMAPPFIAYYGAQTNNASLVREAYVQSRGYRNALKSDKGAWKHIVGPQSADLGLWSTGNAWAAAGMARVLATTMHAPETIPRDLEAINGLTSFVKGIIDAAIAVPKDDGLIPNYLYSDEKWFGEVSGSALLAATAYRMAVLKPDVFGLSYVQWAEGMRETLARHITKEGIAAPAINPLNWGDKVPVMTGSPEGQAFAVMMYAAWRDXXXXQK
g2281	GT69(159-389)	N	N		MAVALRRRSLTRILLLVGGALFLRFVVFPSSSSSTWTRHSTELEIEDQNFLERATRYDKTLNVQKHRFLQSRIGRDERDDLMSDVVRNGVNDYWERFQLPFIESKETANVDAQHLLTSIDQLLSLNGWVAALCPTLTRPFGQNKHEETYDDLARENRLYYIAIVIHSADHFLVDQLAVIVQLAKRLGPSNIFVSMLDYDSNDSTETLTDLCEAVLILLGVPFRIRRVPGMTVDPAAAYYPLEEAHMKNLALDPLRELQQKRQIMFHRVIWLKGFTCPSDILETIRVSFANEAAMVCGMDWAEHNGFFIFSDRWRTRDIEGDQFRQSKSSSKSDAVPPRDTNGAARYAQHLPFQVFCCEAGTHVVDPAQSYYKGIQYRAGTDFQNISRAESSRVRDVDAA…
g2291	N	GT1	N		MLYTLLFATVWLALLACFRIFKILPQSKTLRKCHISSGHKTIAVFLGSGGHTSEVLTLISALDFERYSPRIYFVSEGDHLSVGKAKALELTKSLTPSQENFSVFTIPRARNVRQSLFTTPPTALRSLFACVNILTIKPLLNTHARTLSPDILILNGPGTCLVLCLAVYIHKFFGFRAPRIVYVESFARVRSLSLSGKLLRPLVDRFIVQWPELLGSSKGEYHGWLV
g2328	N	GH115	N		FLNDEQPGLQLWVMEKFTNGTGAAETGSPFNHNFYVKVFELLLRLKGNYLWPAMWDSAFAIDDPENQRLADVYGIAMGTRRALFSRQCLPCSRSHLFSHQEPMSRASPPEWNIFGEGPWNYTSNRDAIYDYWVDGVERAKTYDTVYTLGMRGAGDC
g2355	GH43_23(88-270)	GH43	GH43_23	CS pos: 28-29. VNA-SP. Pr: 0.9335	MTLGAMGKIYLLLQTLFLGLFFLVNVNASPTLIGPELSPALFKRAINATYVFTAFTSSSKSNLFTYTSNDGTNFSLLKGPAYTPPSGLIRDPSVILHSDGKYYISYTTNWSGTNFAIASSSDLQNWTLFTTVSTASSVITPVNTWAPEFFKDPNTGKIHIIVSLSTGSYGPFLPYVYTATDSTLRNWSGPVVMSGISNAGLGYIDTFPVLLGNTYHIFAKAESNGAKHIEHATASSLTGPYTFVQTGNFASWGTAEGASVTKLTNGNYRMRVLDLT
g2356	GT90(282-601)	N	GT90		MRNNLHDGGAWNRRGGYIFVVCVFLLFLQAGLYAGSAGQGGADSTRTASLKSSPKYHPIPDLIEEAETQFRNKVDRQSKTLKAAVIEYRRRYKREPPRGFDDWWEFAKGVDFVMVDEFDGLFEDFEPFWALSGDEVFRRSLQVGALPSIDIVRIRNGEISVLNLEKGFEDSELPDLYFPINAKAEGRVVIPWEEQKYTNLSIQDSSKGIESVIGGTFYPDWRGDGGSVWEAIRRTCEPTSPARRLFSSVRSIFSAHPGGAKNDFAFLSRTSSNLDLCSKPHAHYQQGHLFSDWRTIPALYPVFSPAKAKGFMDIRIPSHYYHGGTKRYTYGWDPVNLEPKEVDDMEVRWEDKEDKVFWRGATTGGGNNPPGFSPQYQRHRFVRIASSTNMEDNRTVTFL…
g2366	AA3_2(37-614)	N	N	CS pos: 19-20. AKA-TI. Pr: 0.5486	MLVTLLLSTALLGLARAKATIIDFNTDAAKGQALLSTKYDYIIVGGGAAGLTVASRLAQASKKNKVLVIEAGGSGVGDPAVTIPSNSFSFIFTDNDWKFSIAPQEHAAGQEINLSQGKVLGGGTAVNGLVWTRGAKEEFDAWETLGSPGWNWKCLYPFMKKSEKLNQPSSLLTEEYGVAVGASGLGSNGPVDLSFPAYIPIQHQKLVEAAVELGHPYNADAYSGKNAGVHYSLSSQTTAPVRETSEFAYLDSLTSNPITTFIHATVSKVNFVGSGILQRATGVTFFGPNGKKYTVQVATKGEVILSAGVVRTPQILELSGIGKPEVLSAVGIKPLINLPGVGQNYEDHTLTLLTYELKPEFPSFDALDYNSTLLAEQTALLAQGQGWLTFAQGVTDFEP…
g2439	N	N	GT0		MDNDDQEDWEQLNRPNWRGLGLSDPIRNVEDKWLLLPAFLKVKGLVKQHIDSFNYFVNVDIKNVVKANQKITSDVDPRFWLKFTDINVGFPDRNETNVVNKGVTPHECRLRDITYSAPIMVTILYTRGKNIVKRNAQIGRLPIMLRSNKCVLAGRTEAELAKMTECPLDPGGYFIVKGTEKVILVQEQLSKNRIIVETDTVKGVVQASCTSSTHGGIKSKTYVVTKKGHIYLRHNSISEDIPIVIALKALGVQSDKEILLLTAGNTEAYKAIFAANLEDAAKLCVFTRQQALDYVGSRVKINRRMMGPRRPAWEEALESLSTLVLSHVPVIGLDFKAKAIFVATMTRRVLAAMDDEKMVDDRDYVGNKRLELAGQLLALLFEDLFKTYASNLKSGIDKV…
g2462	AA1_1(627-944)	AA1	AA1_1		MSKRRKSISCSIAISDEPVGSKSLNFRTQGLSTRATKYIPHTPAQDLKNGKKRKICEEHDEIPVPKRPRTSMANSVPMLKASHAPTTLFVHGSGGSGQLGLGPDFLDEVARPRLHEGFTDGIQCLAAGGMHTLLIDAKGQLWSWGSNDDFALGRQTDDVEGVDSDKLESTPARVQGLGSDFIAVTAASGDCMSVVVGSQGQLRIWGTFRSEDGHSSFDGDPTHPEKALHPQAYPILSRHKVCQVRCGASHVLALTTDGLVFTWGCGERNELGRLDKHSQTSLTPESLGLKRIALIGAGSRQSFAVDGDGVVYAWGQNHMHQLGLSREDSSIMLPTAIGVLHPRHHDGARVVSIACGEFHTLFLFSNGEVWGCGRCDEYALGLANDHPAMIQVLQKHAQE…
g2476	N	N	GT22		MSNLAPIICDNGTGYSKIGFAGNSDPSFVFPTAIATKGPAAQSSRAPAIPSKPGHLASKRGVEDLDFFIGDEALANAKSPGYGVHYPIRHGMIDNWDYMERYWEQTIFKYLRAEPEDHHFLLTEPPLNPPENREQTAEIFFESFNIKGLYIAVQAVLALAASWTSNKVTDRTLTGTVIDSGDGVTHVIPCAEGYVIGSAIKHIPIAGRDISQFVLNLMRERGEMATVPPEDQLRVASKVKETYSYVCQDIVREFRKYDEDPYKYFERYEGEYSVNGRKYGVDVGYERFLAPEIFFNPEIFSSDFLTPLPEIVDDVIQQSPIDVRRGLYKNIVLSGGSTMFQHFGNRLKRDLKQIVDRRLDASVVASGSMLKSSGVEVDVISHKQQRYAVWYGGSLLASL…
g2483	CE10(722-1046)	N	N		MARVLSGKEVALHNSRDSCWIIVHGKVYDVTEFLDDHPGGSKIILKYAGKDATQEYDPIHPPDAISTNLPVEKQYVSLRKNGPISPPLSLGPVEPDTVEKVEIIITDEEKARLERVSNRPPLSEVLNLHDFESIARLVLPEKSWAYYSSAADDEITHRENHAAYHRIWFRPRILRDVTNVDWSTTILGHKTSMPVYITATALGKLGHPDGELNLTRAAAKHNVIQMIPTLASCSFDQIMDEAKPGQVMFFQLYVNKDRAITKRLVQHAENRGVKGLFITVDAPQLGRREKVLKDMRMKFEAEDPSEVSKAGATGVDRSQGAARAISSFIDPGLNWNDLKWFKSITSMPIILKGVQCWEDALEAYDQGCAGVVLSNHGGRQLDFSRSGIEVLAEVVENLK…
g2517	AA9(39-253)	AA9	N		MRADGKTKQVSVSRRDPVFVTVPAELDIESFEDMIASLLTTLAAASMALAHGGVTSYKIGSTTYPGWQPYNSPSGQSSIGRPYSTYDPATASTIHCNNNGAAASGQLSANITAGTPITAYWSQWTHAEGPVMVYMASCGGSCSSANSASLKWFKIAETGLKSGTLNKGQWGNGDIMKDLAYTATVPAALANGQYLIRHELLALHQANTPQFYPECGQLIVSGGGGKTPSGSYLISLPGGYSMSDPGVTVDIYSAAASSITTYKVPGPAVWNGQ
g2569	CE16(8-212)	N	N		MLPRNDLKPTPAEPLGVPFPGELLWNEEGQPNWVGHFITKYRPGPKYKPGATQQDKEYLDSPLLVYDYAIGGNVVTGVQNQVAAFLRGAGAKPDWAPWTATDTLFVTWVGINDCAYHKVHDKNIEALMKIEDKLYDAGARNFLFINVPPIELSPAVPLWNAAGASESYINWNTNLSQGISTFSSTHPEVTTMLFSSHEAFRKILENPKDHGMRVDHVKKVGGDVWDDAPHTARGGRSIIRVGQPQPWLVTSMSSAAELKDKGNELFRTKAYVKAEEFYLKAESVDPSSPVYPSNLSAALYEQAKYSDTLKAIGRSYARLDDDSKANLLPKLSIRFAKALTCGVLAGSIVLEDCTADEKQLISELRAVSELESSHPECKRAWNVWKRVEQSLDHVKTGSK…
g2573	CE5(44-193)	N	N	CS pos: 17-18. ALA-TI. Pr: 0.9414	MRFSLLLISVIAPIALATIIPRDGPIQNTYNEMQDIIDSGDPGQCLPIAVIFARGTFDSGNVGYWVGPDFLEAFPSDKVARQGVDAGEYPANLKEYLEGGSRSGAKALAATVNAYLKLCPDAKVIISGWSQGALVAHLGLDLLDGNTANNNVVALVTFGDPYRLFDMFHLKVRVDHFNSPCIAGDLLCTMEEWNTAKIVGDVQSFIENSVKELSNMKLHKQRYGEIDTLLKRFMKEANENKLSLAVKVAFGEARKLALGFNHFLYGHLHYGQEAAKWAMTEVDDIKALL
g2577	CE16(42-257)	N	N		MHSGASYCATLSDPESNAIPTAMNPLGAKYPGDPEGLYNEPTKPNWVGHLITKFRPGPAYDPDATEQDPEYLKFPLLVHNYAIGGSTVEDLSYQLSVFLKSAGSRPSWAPWTSEDTLFMTWIGINDCAYSTNHDESMKVLFAFQAKLYAAGARNFLFIGVPPVHRTPGFGTHSQGKKEPGKVFQDWNTSLLNSASTFAKRHTDTTVSIFSSYDVFNNILDNPQAYGFHESDVGRKGAIWYDHLHPTSAMHRRIASHLADFLNTIQSP
g2587	CE8(867-1149)	CE8	CE8		MLRRAPTTNDGKVVDRLQESQRINKPFKAPAFMAQVDRTQLTRKRKRAVSYKGQQAADDSDDDDDVRKKKKKKQDEKDAYHNEEELLAAIKHYPVFKPKPFGQVRRFSMPTMTNKDGEQVPLLSSNISLGIRPQSRLIPRPLHDPMEDHAIVLYDPTIDDRETDEERKERLKEEEKQRLEKEALEKTAGLFNPHKSLKAMLGEGQKKAGIEKVPVVIDPRLTKVLRPHQVEGVKFLYKCATGMIVENQYGCIMADEMGLGKTLQCITLLWTLIKQSPHAGKPSIEKCIIACPSSLVKNWANELVKWLGKDAINALAVDGKGGKADLLKRVQQWVDARGRNVTQPVMIVSYETLRTLGPYLANCTIGLLLCDEGHRLKNGESQTFQALNALNVKRRVILT…
g2617	CE16(20-275)	N	N		MSVVLQVSQSWPGFETIKDLVIFGDSYSSVGQGAAPTPLLPLGVPYPGTQQGLWNEPTLPNWVGHLLVKHRVGPRYNPNAARQDAAWLDNPLLVHNYATGGAEVCDVDDQISSFLQDRSHLAQRETLFGSSRSSKLISWLSLLKLFGFNSGDQPQGEIVKSLFRSVDKLYNGGARNFLFIDVPPINRSPAFPSDSEREASLLYLKWNSSLNLYSQEFAFGHSEATVMICSSFAVFSAVLDCPEDYGFLATDARLSHSSIWYDMLHPTSAMHDQIAITCFLTTTMANGPPTPPPTTDIEIQDATKDAEPIASASTMEALPVEPSQEPQQQQPQPQPQQQQPQQPQQQQQHQDAFQVSFTSSIAPLVAAQKWYELSDVAEVADLTGEEVPTRMLVVAPLVL…
g2619	GH6(108-398)	GH6	GH6	CS pos: 20-21. VHA-QS. Pr: 0.9689	MFNSLALFALVSVLPVFVHAQSPIYGQCGGKDWTGATTCASGSTCVKSNDYYSQCIPSSSAPSSASSVAPPASSTAAPPTSTGITLGNPYTDHKIYLSPYYADEVVAAAAVMSDSSLAAKALKVKDIPTFTWFDVVRKVPDLGTYLADATAKGKAEGTKYLLQIVVYDLPDRDCAALASNGEFSIADDGLNKYKNYIDQIVEQIKKYPDVRVVAVVEPDSLANLITNLNVSKCAGAQAAYIEGVTYAIKELNKVNVYMYLDAGHAGWLGWPANLTPAAKMFNDLYASAGSPPYFRGFATNVANYNALSASSPDPVTTPNDNYDEIRYINALAPLLSWDAKFIVDQGRSGQQNIRQAWGNWCNVIGAGFGIRPTLETGSPHIDSVVWIKPGGECDGTSDK…
g2650	AA7(65-252)	N	N	CS pos: 18-19. TWA-GV. Pr: 0.9075	MFPAFFLGLALSVAPTWAGVSPQICQTISASISNGSDVYYPDSEGYARDNSHWLSSSSEQSLCSVEPGTAEDVSVILTILGSTRTPFGIRGGGHSANLGFSSTNGVQIAMNRFVDIDYDEASQTVVIGTGLLWETVYAQLEEYGVTVIGGRSAGVGVAGLTLGGGYSWLTNQHGLTVDNVEAYELVRPNGDISYVTRESEADLFFALKGIVTRFTLKTFPQGQVWGGAITFTDEQINAVSEAAAKFSSDVTDPKAGMYFSYSFILGQLGAAVSIFYDGPTPPTGIFDDFLAIPYATKDIETRSLLSLISAAPASAAAPNSRGMVGSVPLIENSPTLIEAALNETLFWGNVFSFDKDAIVQYTLEPFQPNILSFGADTAYPPTRSVRYLPSGIYFGWTLP…
g2651	N	N	GT2		MHPSSFLGRLVVNLVVALICFIAYSSQIFIIWPCCLIGFLFWNYFLCVYTDPGGVPDSWASEMPLGQDAPPHNSISNPIPTRMGLKLNGSLAHRGTAGCAKSTNLRGPIIVLRAAHGYVAFSNIFLLLNATEDHHCPWVNNCIGQYNYGYFLRFLFYVDIACSYHLAMVTRRVMTETTATYWNTVTSLELIFIVLNYVFCIPVLLAVGGFSLFHFSSLMSNMTTIEGWEKDKAATMVRGNKLREIKYPYHLGRRRNIDSILGPNPLWWCWPTPAPGDGLKYELNKDEGYELSDWPPQNPIPVPSAEQPESFNLPDSPWTYGNGFNPELQPSNSHVRNSARRPKRQAHHSTLPPYHPDYQEGASSGYDYEEDSDSSIEEERTRLTTKNVRRGSEGYEIRP…
g2748	GT59(415-686)	GT59	N		MSSTTTLTTTEQPQSSLTLRPKADEQEAYKYKHLLPVFVHNTLPPLTPFEHVDPGRRALAHEKPRAFLDAATSIVDLTPHLGTEVRGVDLTKLDSRGRDQLALEVARRGLLVFRDQASFIDASPSSYLEWGQYFGRLHIHPCSGHPDGYPEIHLVYKDANSTFNFEFSDSTTSTLWHSDVSYELQPPGLTTFFLLSSPKTGGDTLFISQVSALKKLSPGFVAFLRTLKAVHSGVEQAQHSRSGKRGGIVRREPVENVHPVVRRHPVTGEEALYVNRQFTRRIVGFKREESETILRFLYDHIDKSGDIQARVKWAPDTVVMWDNRVTAHSAIVDYATSNEARHGARVTPQAERPIPALEGLDLSLKCSAFVPLIRTFDGDHQRPPRRIELIPGAMSLSYL…
g2808	CE15(112-433)	CE15	CE15	CS pos: 18-19. AFA-QQ. Pr: 0.8706	MAFKHFAFLVAVALPAFAQQPLYGQCGGTGWTGATTCVSGATCQFQNQWYSQCLPGAPPATTAVTTQAPATTSIPVPATTAATTGATTTVIPAPGATCVPLPSTISLKSIPKLPDPFTFIDGSKVTTKAQWACRREEISQLFQRYELGTLPPKPTVSASYSGNSLTINVSDAGKSISFSVSISAPSGATAPYPAIIAYGGSSLPNPSGVAIINFNNDDIAAQQGQSSRGQGKFYNLYGSGHSASALMAWAWGVSRVIDALEITPGANIDTKRIAVTGCSRNGKGAIVAGAFDERIALTLPQESGSGGAGSWRISDAMKKGGIDTQTAQQIISENVWFSKAFEQYVNQVPMLPVDHHLLSALVAPRGLLVIDHTSIDWLGPRSVWGAQTTANKVWQALGV…
g2932	GH105(48-366)	GH105	GH105		MSTRNINPHKVATIKHIRNLIHCLVNIKDETGEFLLPLPDGRIIDTKGWNDWEWTHGVGLYGLLKFNEITGDQETLDIALGWFKDRFDIGTTKNVNTMSPLLTAAYLHEAKAANYGVHLDSWAEWVMYDMPRTTDGGLQHMTYLTDNEEQLWDDTLMMSVLPLAKIGLVLDRPAYVEEAKRQFLLHIKYLQDLQTGLWFHGWTFIGRHHFSRARWGRGNCWVTVAIPDFIDMLQLPETDGTRLFLVTSLVAQIDALVKYQDEKSGLWHTILDDPTSYLESSCTAGFAYGILKSIRLRLIPREERYVNCAKKAIQAILDNITDDGELKLTSFGTPVFDDLEDYKKIPLTSMPYGQSLALLALTEHLRTFL
g2935	GT2_Chitin_synth_1(210-381)	GT2	GT2		MANPPGGASPYPTGGDYGDPFADRPRQTQFAEQERPYHGTSSPNLMPRPFESTASLSTTQEFGASRTDFDDDSVERLPLNAGQTFTGGFYPPNVDPDSFGDPYGSRPMSVATTSSNGVDSAWRRRQTIKRGVTRKVKLTNGNFIAEYLVPTPIHSAIEARYASGNTTEFSHMRYTAATCDPDEFTEANGWSLRTKTYGRETELLIAVTSYNEDKTLYARTLHGVMLNIRDICKTKQSKYWRTQAESGNPGWQRITVALIVDGLEAMDKSVLDLLATVGVYQDGVMKKEVDGKETVAHIFEYTTQLSVDATPQLVLPQANDPNNLVPVQFIFVLKAKNQKKINSHRWLFNAIGNMLNPESCVLIDAGTKPGHKSIYYLWEAFYNDPHLGGCCGEIHAMIK…
g2939	GH2(28-701)	GH2	GH2		MATTRILKDWSFTQVGGGQGTNDGEWLQTSSFPTTVHVELLKLKKIPDPFLDLNEWEVQCKASCSIPSWWRLFAITGIGESAWAFKTVFDVSEEELKPLNVDLVFDGIDTFASVKLNGEEILSAHNQFLSYALPVKSLLKVGSNTLILEFESAFRKGREIEKDHEKLKLWNGDSSRLHVRKAQYNYGWDWGPILMTIGPWKPIYLQTYENRIADLFIKSSVSESLEVELTATGTLAEKATGFASFVLKGPDGTIAASSNKIPTDSGQYKVSFKFDAGTLSLWYPVGYGEQPLYIVETEIADVEGKLLDSKTEKIAFRRARVVQDPLEEQEGRSFLFEINNIRIFCGGSNWIPADSFLTTMTPERYRAWLQLLVDGNQNMVRVWGGGIYENDAFYDICDE…
g2958	GH47(46-479)	GH47	GH47	CS pos: 21-22. SRA-AT. Pr: 0.5616	MHWHQYWLLVAAADVLATSRAATTGLPSWTTDRKIATREKVRELWYHGFDNYMNHAFPLDELMPLSCSGQGPDWANPSNIASNDVAGNFSLTLIDVLDTFVVLGDTAGFSTAVKNVVDSVSFNVNTKPQVFETTIRVLGGLLSGHIYANQTGQPFFLPWYKDELLVLAHDLGKRLLPAFSTPTGLPYARINLRHGLMRGETLETCAAGAGSLILEFATLSRLTGDDRFEKAAYKAFFAIWNRKSDIGLVGNTINTWTGEWTAPEIAGIGAGIDSFYEYALKWYIMSGDSEFLDVWDDAYASIMRYSRATDGFWYRNVNMKTGDTAFYSVDSLSAFWPGLQVLAGDVQSAIKLHLMYYNLWRRYSGLPEVFDTNFKKGTSFQYPLRPELIESTWYLYRAT…
g2965	GT4(207-351)	GT4	GT4		MEPISIAMITDFFHPNVGGVENHVFMLSANLIRRGHKVIVITHSHPPDRVGIRWLVPSLKVYYLPFVPIASSATLPNFLTFLPHLRTILIREHIHLIHAHASLSSLGHEGILHSHLLGVRTVFTDHSLFGFEDAASILTNKLLAGTLRNVDAVICVSHTGRENTVLRGELFDTAEDGVSLVVRDNVYVIPNALVPENFRPSPPSPSDTITIVVLSRLAYRKGIDLLVATAPRICKAFPNVRFIIGGDGPKLIDLLQMREKYQLQDQIELLGPIKHTDARSVLIRGSIFLNTSLTESFGIAILEAACAGLYVVSTRVGGVPEILPDEMISFAEPDEDDVFRAISEALKIVRDGQHDPVKAHETIRCFYDWAQVSERTEVVYENVMKSPQMEIYERMKRTM…
g2970	AA1_2(28-362)	AA1	AA1_2	CS pos: 17-18. VLA-GI. Pr: 0.5668	MIIAAVAFAAGLTPVLAGIHEVWWNITPLPIQVDSTDLLLVHVSNSLDDPTTLHHHGMLFNNSAWMDGAIGLSECGIPPGGQFDYAIPVNESGQAGTFWVHGHSNGHYVDGLRAPFVIHPPKEVYSYDDEFTVILGDWYHQDHKTLMKSFLSVDNPDGVEPVPDSPLIYYAQGANYLGGFNDNAKLNVEPGKTYRLRIINTSAFAMFMFWIDGHEMRLIEVDGIDVQESPIDLISISVAQRYSVLITARNDSSTNWAIHANMDTDMFDEVPETLNPNTTSTLVYSTDVKTVNYGSIEEYHEIDDKSLIPFIPFDAPAATRVIELEADFDTMSDGTNRGIFNQITYTPPLVPAVFSALSLGANATVEHAYGPLSFVLEHLDVVDIIIKNADDNQHPFHFH…
g2973	GH128(288-486)	N	N		MRRWEAMGFSGLARWLNAPSSGLSLIKENIVLNHNGKLEGKWSLSLLSYRSNLFQVAQSERSMYTLTINNNVFVWLEDAGAPNHNEVPPDSPPPTHYMRTYLTLSPPGALEHLLKQLKARWAPVRQANNAQRSQQLLIEGHIFSIGTDWIVRVGHVILPGGAIKGMLLEAEYLPLPVLHSSMADGTSELLSNLLTSILPNIPDAKTVAITISDAQWEDVLWDPEEEAKRAKAAETKKADTEDIYVYGNEDAPKQQRGDWTGIERDRRSAFLIMGSLRSEGILNPATVKGSSVVAIYDWETYPPPTTNGNLRGLELIGMQREMDAKSSPIGELTKRAAEQGWKTVFTLNEPDINGISPADAASWYSTYISPMNIQKALPAVTSSTTNGQGLAWLDAFLEA…
g2990	AA14(20-288)	N	N	CS pos: 19-20. ANA-HV. Pr: 0.9105	MSMIFSAVAVLFVAQIANAHVSPFAKGMYCLNGVSGGDINAYEAVNPVYQMSHNDYWMHANTGCLNAPPAPGVFLELPAGGSFTVEYASNQAFTSLSYGGAKAGLWPDGADHDDLTGDRQECVISPNLHAQNQSMAAGTAFAISYTSDISQVNEDNLVVFTVLEKSPWYREATYQVPAAMPACPEGGCICAWGWVPYHCGIPNMYMHPYRCTVTGATGTTAVGQPKSPEWCEDDPSKCVSGPKKFIIWNQLEGNTVSVSGYDLRGQEKSPGYNTRMGFYNGAQNDIFTGGASDPSYSAPTDGKSSDTPSSDDSSSSSGSSDNSYSSSPADTSSIPEAGIPSSPATDAASAVVDSSTYIPSSVTTSSSATDASGTVCRRRRRSLSKRTESLVANHAHRRH…
g3021	GH43_13(18-321)	GH43	GH43_13	CS pos: 17-18. AYG-FR. Pr: 0.5576	MITAWFHVATLFAFAYGFRNPIIPGFNPDPSITRVGNDYFLVTSTFEWFPGVPIYHSTDLIKWDLIGHALTRSSQLQMRGTAPSGGIFAPTLRFNEQEGAFYMITTFFDVISPPDVTSTPRGFYVKTYNIWDDDSWSDPIYIEQPGIDPDLFFEDNTTHLSVANGANFVVPDSGYFSIWKTEIDRLNGDSLTESEVFHVSSLPLNTPRLAEGSHLYKKDGWYYLMTAEAGTETVHREMIKRARSLEGPWEQNPDNPILFNGRNLSQPILATGHADLVETPQGDWYMVFLGIRPQAPRNASGSHQLGRETFLAPVEWKDGWPIVNGGEPITLEMPGLYDLPRPQSWRDDFTDAFTDKAYYTARTPYRAFHSFTERPGYLRLRGNPFTLSDRETPAAFFRK…
g3036	AA9(7-221)	AA9	N	CS pos: 20-21. AHS-RE. Pr: 0.5393	MKFSLVSSVLACVALVSAHSREWALHVAGTDQGDGQGKYLRQPPNNNPVKDLTSNDMFCNVGGTTAVASSVSVPAGSTVTSEWFHNVRGDDIIDASHVGPIVVYLAPKTATPGQAAWVKIFEDGFDGSEWAVVKMKNNAGKVSFQIPSRVAPGDYLMRVELITLHEADSLYSANPARGVQLYPSCNQITVTGSGTTPLPAGVAFPGAYTDSTPGIQFNIYGSEFSGYVIPGPAVWNGSGQSAGGSTPDPNKLSSCASAPPEKRSVYNFNRLKRDGKFGRLL
g3065	GT76(13-293)	N	N		MLLRYVPTPIFHLLSVAVDVGSTITFYDLSLEVSQEERIAALATLLSLLPSSPATLRLAPYNEPFFAFLSYRGILHCQRKQYLAATAYFTLAGLFRSNSILLGGFLLWGMLVAPFLSGKSIQLSAPLYVAPVFLPFLGHNAAAYLSFCTSDNAPQWCTHTIPSIYSHAQKSYWGVGFLTYFTVAQLPNFIIAAPPILLIYGFAISHIRQSSTRPFRSRTLTPHVIHAVVLTTTLVFSAHTQIVLRLASSMPVTYWAAAWLVMYHPRLGYAWVAWSIVWGTISIVLWATFLPPA
g3079	GH43_26(615-905)	N	N		MATRSRVISLYKELHALGKDYPDPSYDFNGRIRKILENRHLTDPEDIEKAIKFGEYIKSGMSNQNSPLQDLTPHLYRRDSSSVFATEIPPSEAQIYVQPPQGALSEAHCPLTSIMAENASSSSSIPEVRATKRKLDDAFQTLDDAVSQPEYQPRPLKKSNTARSLYSTLAKYGIKTKDQPTGSYSKSTPHLTAILSRAATRTRKAFPFKFSESVPVSAASGAEYRPSSISSFLSRLSSYKLSTYANKPPVLDAVAAAKCGWINDGKDRLLCGLCNASWVVAGREGMSREAASVLVEKQKVSLVTSHKDGCPWKTRQCHASIYRIPLQSPTTTIRDIKTNAATLESLLVDVEVKHPMTANQVSSLISTVKLYTLSQTETTDLLPESSDTALLTSLFGWSI…
g3095	GH16(7-355)	GH16	GH16		MLLVFSDEFNEDGRTFYPGEDPYWEAVDLHYWVTNNLEWYDPIAITTEGGALRIRLDDIPTRGMDYRGGMMTSWNKFCFTGGLVEVSVTLPGANNIAGLWPAVWALGNLGRAAYGATLEGMWPYTYDSCDVGTVGNQTLNGKPELATVDGDSGQNGALSFLPGQRLSRCTCPGESHPGPMHADGTYVGRSAPEIDVFEAQVANGVGDVSQSGQWAPFNYAYEWYNTSDNYVIYDEDATHLNTYKGGVFQQATSAVSKTNQDCYELGTGCFATYGFEYKPGYDDVYLLWISDSKPTWLQRAAGMEADPRVEISARPVPQEPMYLLANLGMSNNFGFVDLENIIFPAMMSIDWIRVYQKKGEINIGCDPASFPTQAYINEYIEALSDQPPSAPAQGMLSQS…
g3158	GT2_Chitin_synth_1(289-454)	GT2	GT2		MNRYPTYENVEYDESANSSEDESEITDYLSSYPQSQYPSQYQYSPMASQSSTQFQRYQPGRVLEPIHTGETLDLHGNTNSYPSSAGHTRYDEEDYVPPSMYSGSTTSHDEPEFDHFSYDPEGFTSGFHPDARTPFRSRSPTPHVDDEDYLVDGDRSFHYTGPEPEKDKEPAGYFPSDPSFWPSTMAKHPSIASQSEPETSNGMMHFGRAPAGKTERRHRKKRVKLTHGNLVYEEVIPSMLVLPRKANAETSQFSYSTVFGDPDEFSARQYTLRQVKYKRITEIFVVITMYNEDEILFCRTLYGVMRNIAQLCTRKNSKTWGKNGWQKVVVCIVADGKTKIHPRVLDCLTLLGVYMDPHKVAKKQGFNKSRPAGHLYEYTTSFGLDANLHFKYPDKGIVP…
g3161	N	N	GT2	CS pos: 23-24. AVA-AN. Pr: 0.7425	MKSFRYLSLVFLGIFQLARPAVAANGTCISSPESSCTTLVALCVNKVASGQVLSLSLLSIGLDLWQVASNNFWSVPECFTGATCAGVYAPMVGSCASDPNGCPVTWTDFVNYFYNTVQGTLAMDWPTSGDAVLAWWAEIATWTGFCSGTNCVNGQIPYTNIDDWLRFSSEVLVTTPGNPPIRDPLSPIRDENEDDWDPVPNGPCPYEDSSLCGYDDGPQEPPDTDSTSFATSSASLQPKFATLSLTARGDTSSSLVPSSIADDFLPRNVPPPVYITNGTDRVAVDLNLDGGSPPERRSFSIVERVIANMDTHLLQHRAPXXXXPSKDTCKGRIDTPSPLPILTYYCDYLPKICANIRSSGLLFNDEMILTYDPFGTGTRRSSVCGTDYRETLRPAGCDR…
g3175	GH18(2-341)	N	N		MAYYPSWVSLDPEAVDFTLYDWIDYAFAIPTADFGLEWKDPRDEEKLKKIVEKAHKGQTKVKISIGGWEGSQHFSAAVATDESRKKFTDNLKKLCESTGADGIDLDWEFPGRKGAGNPFSKDDLANLLKFTKTLRYTFGTKLAITSAVDHQTWFNDKGEPTKDLKEFGELFDWVTFMAYNFNVPRKDEEPGVNAPLSNGCKNSTRPEGNIVSEMQRYIDAGIPKNKIAIGFAGYGYLYKSDNDKLRYRDAAITLKSEGGKEQGAIQFTDIVKAGALNDKLEATGGFTRHWDKCSSTPFLKGDGQLVSYDDPESLKLKGKLVKDRGMWGMAMWDIHGDTKEGVLIKAAIEGMGRKTDKKEKRARHSR
g3176	GH18(66-407)	GH18	N	CS pos: 17-18. GCA-DT. Pr: 0.1708	MFSLLTDYIALILVGCADTPQRRPLPEETETETDTDTDTRIRRSDHDATTVTTTRKPRQNKGPFTMAYYPSWITLDLATVDFTPYDWIDFAFAVPTENFELKWDEPQHEATVKQIVVKAHQGNTKVKISIGGWSGSQHFSAAVANDESRKKFADNLQLLCNTTGADGIDLDWEFPGVKAAGNPFSKDDTANLLLFSKTLRDTFGTKLVMTAAVDHNLWVDATGKPSKDLKEFGELFDWMTFMAYNFNVPRKGEEPGANTPLSNACGNSARPDSNVETEMKRYLDAGIPENKLAIGFPGYGYLYPSNNDKLRTRQAVVTLQSEEGKNEGQIQFSYLVEAGVLNGEWKGAGGFTRHWDNCSSTPFLTGNGQLVSYDDPESLKLKGKLVKDRGLWGMAMWDF…
g3207	N	PL0	PL0		MVNYDSVRGDDTDGFINGTPARKAGISNWIKFGIPVAVVVIVGAVLGGVLGSRAANKDDDSSSSSSGSNSGGNPGSSDPSEVASVKNDIGLFPTSSNAEFSIPIYPSTTNTAAFTSPTVLSGLSWPSDDFAPSSPAPASVRPDRPRLIAPKYKWDALPDLIRQDPYLASWNDTIMSYASSLLGQGAMAYYMDGASGILDISREVKQRVKALAYAYRMTSDTTYVDRVWLELQNAAGNSDGSTFTETDKWNSEHFLDVAEMASGFAIAYDWLHDIWTDDQKATIREAINTNALAYGVEAYGGATYGWWRTGIRGNWNCVCNAGLTLASLAIIDDDDVGHASALLGLTIDNAKQNCAEAVSSDGTWAETPNYWYFGTAGHAEMASALLTATGSEYELMTVN…
g3240	N	AA1	N		NIIEADGVSTEPIEVDQITIFDGQRYSFVLTADQAVDNYWIRAEPTPGPTGFENGINSAILRYSGADEAEPTDDTVESTNPLDENALVVRLAFSC
g3241	N	AA1	N		NIIEADGVSTQPIEVDQITIFAGQRYSFVLTADQAVDNYWIRAEPTPGTTGFVDGINSAILRYSGADEAEPTDDTVESTNPLDENALVPLENPGADGTAEVGADDVFAINLALAFDYL
g3263	N	N	GT29		MFGQNKAMLVTDYVHPFPDKVPFHRQAAEVPGTKRPGGTGIYRNAIFGYVDSNTPGALQTVDQVFLSGLKGGRDRKMLGHRPRISTSPLKFANYYVWQTYGEVDLRRRWIGSALVKLFSSGELGGGEFPTVGVWSQNRPDWQVIDIALQSYQKVGVSLYDTLGRDAVEYIVKHAHVTVVFTTADHIPSLLKMAPSIPILRMIICIDPLPTDAWNILQQWSNTVNIQLKQLSEFEEFGRVNLIEPIPATLEQISSICYTSGTTSNPKGVLLTHRMMSAAVQSNLYGLTLPDDGSLLSFLPLAHIYERVTEFVCIAMGAHIGFFTGDPARLMEDAQVLKPAMIPAVPRVFNRIYQGAMAGGDVPGLKGAIFRYAVQTKLANLRTTGATTHALWDRVIFRKV…
g3318	AA9(6-226)	AA9	N	CS pos: 17-18. ASA-HT. Pr: 0.8105	MISAAAVLLVLSTSASAHTIFQELHVNGVSAGHTTGIRVPEYDGTDSMPLDVICNGGINPYRQPVSSQVIPVPAGASVTAEWHHTLEGAKPGDASDPIDASHKGPVISYLAKIPDATQQDVTGLKWFKIHEDGYDASSSKWGVDRMIDNKGKVTFSIPECVAPGQYLLRHELIALHSAGSYPGAQLYMECAQIEITGSGSASPATVSFPGAYSGSHPGITFNLYQPFTNYTIPDPTFTDTFPVTLRVVFLTRGQPVAKQVSMDNHKQGYMHIRDWHFLYVSLVDMRMMKTMEAISTILVVVPLVSQGIRYWLIHQTKLLRYDKYPHSQLPVNGAHYYKDACHNRQPLRVVRGSRCRSPYAPAKGLYRYDGLYMITRAWEEQGRDMTTKCKFRFQRLVDQ…
g3328	N	N	CBM13	CS pos: 19-20. ATA-ST. Pr: 0.7282	MLFFTFLNLFGILVSFATASTIQLVESDGGGEVFPRAPSTFAHPGVLIDRAQLDFIKGKVNSGAQPWTSAYNSMLSSPLASLSRNPKPTKTVECGPTSTPNHGCTDERQDALAAYAMSLAYYISGSSQYAQKAISYMNAWAKTIQSHTNSNAPLQTGWAGASWARAAEIIRHTYTGWSAGDVSAFGTMLRTVYLPTVIKGSQSNGNWELVMLEAAIGISVFLDDKTSYDTAMKKFMGRVPAYVYLLKDGDYPKAAPGSGLDTKAKIISYWQGQPTFQANGIAQETCRDFVHTGYGLSSISHIAETSRIQGTDLYTGDVGERLRYGLGFHAQFQTGAAQKPSWLCPNKSLKLGLGPITEVGYNAMHNRLGYAMANTEKLTKSGRPAGTNVLFVGWETLTH…
g3330	N	N	CBM13	CS pos: 18-19. CSA-AS. Pr: 0.5078	MLFFTILGVFGLFVSCSAASSIPTPVERASGDVFPRAPSTFTHPGVLIDRAQLDFIKGKVNSSAEPWTSAYNSMISSSLGSLTRNPSPTTIVECGPTSTPNIGCTEEMQDALAAYAMSLAYYISGSAQYAQKAISYMNAWAQTIKSHTNSNAPLQTGWAGASWARAAEIIRYTYTEWNSSDVSAFGTMLGDVYLPTVIKGSNFNGNWELVMVEAAIGISVFLEDKSSYEIAMDKFMGRVPAYVYLLKDGDYPKAAPGSGLDTKAKIISYWQGQPTFPENGISQETCRDFSHTGYGLSSISHVAETSRIQGTDLYTGDVGERLGYGLEFHAQLQTGAVQQPSWLCPEQSLKLGMGPTTEVGYNALHNRLGQAMPSTEKLTKSGRPAGTXXXXSCL
g3338	GT35(142-858)	GT35	GT35		MTSVIDPKTIGKPARARRHPGYLPETDEAGKEKWPRGEEDVWKDGTRGLDTDVKSITKSFVNHVQTSLARQAYNLNTFGAYQAAALSVRDNLILNWNDTQLTYTRKAPKRAYYLSLEFLMGRTLDNALLNLGLKDQYTEGVRKLGFNMEDLLEQERDAALGNGGLGRLAACYLDSSASQELPVWGYGLRYKYGIFQQLISPEGNQLEAPDPWLDNQNPWELPRLDVAYDVRFYGQSDRLNDGTARGNWTGGQEVLAVAYDVMIPGCYTKTTNNLRLWESKPKRGFDLNSFNAGNYEGAVSASNSASAITSVLYPNDHTTFGKELRLKQQYFWTAASLADILRRFKNLGKPITEIPDFIAIQLNDTHPTLAIPELMRILIDEEELDWDVAWGITTNTIFY…
g3374	GH18(90-446)	GH18	N	CS pos: 23-24. TNA-LS. Pr: 0.4252	MFGLSFRTAIALLSVGIHVFTNALSIAAINDRIWARTASTLKGRQDSAVDGEIPAGNGTAVTPEGTNSTETTVPDQEADASGGAQEGPFVMAYYPDWVQLKPRDVDFSLLDWIDIAFALPTSTFDVGWGEGGSLKEPLPVFKEIVDAAHAGKTKVKISVGGWTGSKHFSAAIATAESRTKFLESLVSLYKSTKVDGLDLDWEYPGQEGDPGNKFSLDDTDNYLIFMKALRKALGPKAKLTAAVTPIPWIGKDGNPSKDLKGFAEVMDWVLIMNYDVNVPVQQFPGPNAPLVDNCGNAERPLHNAYGGLKAWKEAGFPANKIALGIAGYGYIHKSDAKEIKMRSAKRQEPAAESTTSGGAVKPDAAGTTQIQFSSLIKQGALSSDFKGAGGFTRNWDTCS…
g3375	N	N	CBM13	CS pos: 18-19. ALA-WT. Pr: 0.6404	MLQLLYLLGLAACVQALAWTTTPFNPPSIPLAVRTPYLSAWLPQGSGAALNDVWPTFWTGSVLGWAGFVKVDGVAYSFMGAPAVPDAIFQKAVQKDFKFTGTQSNFVLTAGPIDLSVSFLSPVEATDLVKQSIPFAYMALSATSNDGTAHSVQVYTDISAEWVSGDNSLVANWSTTMGTLVTHQVQLVSQNVYAEANDHAQYGSAFYAILNVTTGATYQTGSHTTVRAQFINNGALSNTKDTSFRAINDNWPVFAFARDLGAVVSATELVVFAIGHVRDPAVSYIVENDGRQDRSLYFWSHFSSTGALIEDFINDYDGALTRANTFDSKLENDATAISADYAGIVALSVRQALGAIELTISKNTDGSWNTEDVIIFMKEISSNGNTNTVDVIFPTWPVL…
g3376	GH18(83-422)	GH18	GH18	CS pos: 18-19. INA-AP. Pr: 0.8310	MPFQSLLLLPLTAYVINAAPVVDSFSSSSSLVATSPTSSSSQASMSPISPVGYGAESVFVYPPGPSASSTASDDQSPSKKPLVMAYYPDWISSDFPPEKIAFAHYDWIDFAFAIPTASCNLTWDDPQTAPALLSRLVDVGHAANTKIKLSIGGWTGSHYFSDAVANNDSRQLFAENIALVYKTFGIDGIDIDWEYPGHQGESANVVSHQDALNFLAFLRVLRAALPAGAVLTAATQPVPFVGEDGQPMRDVSEFAGLLDWILIMNYDVSSSSPTPGPNAPFYDACHNSTQPEANAVGAFNAWNAAGVPASQMVLGIPSYGYLSTSTATTLRSRFIARQTSSALVADDNKPEGQIQFRSLVSQNALVLNTTSAVTSFVAGEGFVREWDECSSTPYLRSSQ…
g3393	GH128(38-270)	N	N	CS pos: 18-19. ASA-GK. Pr: 0.5826	MLSAVSLTLALFVTAASAGKRGLAWPWYNGRLDPGVFNNGQGQVVAIYDWETYSPPSTNGAGGLGFIGMQRCLDCSSSPIGELAARQRAQGWVTVFSLNEPDLAGISPVTAANWYKQWINPLAIKKALPSVTSSGSAGQGLDWLAQMINACGPLNSPNGCYADYINLHWYGNSLTEFRNHITNAHNRFPAFNIVITEFALMNPSGGQAAQVAFFREAFAWLDAQPWVTLYFPFVATSPSLFASNDPAGAAYVGTGSTLYNDNGSPSAVGNLMY
g3402	GH3(178-363)	GH3	N		MTATGLPYRLEHATISSRXXXXPARIAHLVLHSLRVSGSIVSEERLNSDQHTHCPQNRTLIAREIAYIPSDLASLFSMVNTKARRSNDVTTDESLDHRLAKRDPCSIKLAHLHGIRCRRTAPSPVFVLAFALSAHLVASQLDLSSFHFTVRRVRSLEPESATRRSIQRRELNLLSPSAPRVGLPAYEWASEALHGIVISLGSNFSDSGEFSFATSFPQPILTGAVFDHSLVQGIAAIISTEGHCYNNAGRAGLTFFSPDINPFRDPRWGRGQETPGEDPYRSAQYAFSGFSLVQGLQGVIDPEHYKVAADCKHYAAYDLEDWGGIERYEFNTIVTQQDLVEYYLPSFQACGASVKCSYNDTSASLARIDGSRGVALPLEMSLTTLRGFIHGCYSHALQQ…
g3414	GH5_12(84-601)	GH5	GH5_12		MSDDLTRTDSEASFIMVGDNGNSGARSRVPSVSTSSDNSDEARAPVVHPSASASYTAGSGLSYAHDWTSRGTGGALRLHGRHFVDNYGRVCGLRGVNFSGCSKSPANHDDDTFPADAETVTFVGRPFPLDEAHEHFSRLRRWGFTFIRFLVMWEAVEHTGLGQYDTEYLDYVRNLLSILPQYGMIAFVALHQDVWSRYSGGSGAPAWTLEAVGFDLHKLEETGAAWLKGVRGGGHTEDERGLWPCGYQKLAAATMATLFWAGDAFAPKLRVKNKHGDEVSIQQFLQGAFLDMFQVLARSLSDLDCVIGFEMMNEPHRGYIDLQSLHYFDYNTDLHLATIPTAFESFQLGAGYPTEVAVWTRSFPMPTRKTGRALLNPKGAKVWRKDGPTDGRCIWEMHG…
g3421	N	N	GH3		MHPSHRPQGPSARSSYAIDDADGLPLLPAQTFSDYPTTPRLLNNQSDRGIPHRPTYLSFNDNPPNISNYNDDPFNPNVLYDPTKYHSNQYNTPNSLGANTPSPYHSIFPDAIYKPPQRHPLPFAHSFEYPDWQRLALHVFLVGLAYPALLVFVVVARNKTLFWSRFIIAIGCGGIGFVLALSLLSMAQPFLEASTWATIIHQSRAADSPGIRLRDVAASSQDGTSAWPALRLLWTRWMYTGTARKNRATYDKRPWTLAILFFLMTVILAASLPFLLGRIVNIETEILHQRNEYFEVPVKGDLSAEDIAKASDLARVFNNFAVTWTLSPFSSHGSLPPTISYEWENDSVYFAEATSSQFVEGGTGFGTFNQDTTSPSIEVSNEEVNLATSVVPGSLLRYP…
g3422	GH3(575-779)	GH3	GH3		MWSSVPSDRIKVKTQKARPSQQQQQQPQKAAPIPKSKAVLAIESLIDTFQTHSPDRKDEKGGCFCQARLHPLSRHGARLCLSCGLVLCNLNPPYAACPSCASPLLAPHARNAAIASLHQELETQLAEEQRKREEHARRIVAAEGSFPTLPTGKPSAPKPPPQHHTVLSLNSKTKKVMVQTRSTAPSPSPSSTPALDPVDEEPIRVPPPSQPSVSRTRVEGRVWVNLLGDSAKYIAPPLASAPEKKSRRNRKKNNEVRTENCDVRTTHLGVRSLCAEKLRGSLEEASLPTNVSSNTWKFEGNRLPSGRPSTMPWFVVDEAVLWFWIPDLIAWLYTTAVVICVMHGPRLILPGRWYDTNRQIQDFLWDPMPSIWFTWSVIVLGFHVPPSVLCTRTRRQLKT…
g3424	CE10(59-308)	N	N		MVPRLDPGYLEFHNASLINITPPHTLPWDPSLRNLPAVPGGSPLLPVGATRDLDLSHTNMRAFTPPGSSPEAGWPVFIFFHGGGWTFGTIDSENSFATNMCVRAKCVVISVNYRLAPEYKYPVAVDDVVESLDWVLAHGKEELNIDTTRIAVGGSSSGGNLAAILTIKAAQRSPPVTLLFQLLVVPVTDNTASVDNLWKENALTPWLSPDRMNWFKANYLPNKEDWTKWDASPIFAPEEALAKVPKAWIAVGELDILREEGVQYGEKLKRLGVEVEIVVYKGAPHPIMAMDRVLKIGAQLVSDAATALAAAIGTE
g3427	CE12(24-217)	CE12	N	CS pos: 17-18. AAA-FR. Pr: 0.4670	MRAGFFTLVSVITGAAAFRRSAFVLIGDSTTALFGGWGDGFCGNASINVASSLAPNTYCLNAGRSGATTGTYKDNGHWATAVDAIKTQVASGKNTYVTLQFGHNDQKIAPPESMGANLTDMVHELRDIGAHPILVTSLTRRNFNADGTIQDLLKDWADQTILISEEQDTPLLDLHASSIKYCEAIGRDASHRLNLFPSDNTHINDNGSIVFGRLVADLMVDSFPRGYLPIIPNRALTYNITNGIPSY
g3445	GH3(189-390)	GH3	GH3	CS pos: 19-20. VLA-QN. Pr: 0.8563	MSVRRLLLGWAACVPLVLAQNSSVIIDGTTGASSTVTFSTDLSLSATSSGSIVTAESSIFSFPSSAPSSGVVSISDSETVTESASGSVSAAPSAGAVATTTRNTVPISSYTFTAYPSPTATGGVPTEPRSPPQVDSNVLPDFSGAWAAAYEKAKALVATLTFEEKVKIGTGDGWEGGLCVGTTPALAEKGYPGLCLEDAPLGIRFADYVTSFPAGVNAAATFNRRLIRQRGLYMGREHAGKGVNIALGPMMNMGRLAQGGRNWEGFGADPFLTGEAAYETILGMQEGGVQACAKHLVGNEQEWHRTTSSSDIDDRTQHEIYIHPYLRSVMAGVTSMMCSYNLLNGTYACENDKILNDIVKRELGFQGFIMSDWQATMSTISVITGLDMTMPGDVVFNSN…
g3447	GH38(310-564)	GH38	GH38		MSAANGHRAVQDPYPELNYSAGPKWVKGLTQGRLGTFTGGHYSNVNLSSVLYHHNVDSQDNIKLQVWSAPGLTKPSFKEAMKQKFKPAKKYDRFGPSCECAVYLFHHSLLTKCVGTNHWFKVSLVIPGYWQQYERVQFEFDPGCEALVYTVDGLPLQGITGGAGGDRRVEHIIPIEARKRGTYDIVIESTCNGMFGVPWNGDTIEPPDMNRWFTLATADLVVPNQDAWHLMWDFQTLREIIDNVGGNTPLQNKALVVANDVMNAFNKNEPGSVNACRRIMEEAFGEGWQAKGAGVYDEGDSDANTPIWGIGHCHIDTAWLWPYHVTQQKVARSWSTQIDLMERYPEHRFSCSQAQQFKWLEELYPSLFEAVKAKVLDGRFQPVGGSWVENDGNMPSGEA…
g3461	GH10(86-401)	GH10+CBM22	GH10	CS pos: 19-20. VSA-VG. Pr: 0.9336	MLKFLQLVSLAVYLGQVSAVGIYGQCGGKNYNGDTNCVGSVCTVVNEXCLPGTPATTAAPETTAPGTTAAPPTNTASPSADGLNGKFVAKGKKFWGTCADSNTLNIAANVAVLKSDFGQVTPENSMKWESIEPSRGSFNWGGADTLVNWAVQNNKLIRGHTLVWHSQLPGWVSNIGSSSELTTVIQNHIASVAGRYAGKLYGKCLGYNSFSWDVVNEMLTEQGGLRDSVFSRVLGEVRAQKLVTSASSNSAFQSFVAIAFKAARAADPTSILYINDYNLDSNNAKTQGMVALVKRVNANEKIIDGIGTQMHLSQGGAGGVQAALTALAAAPVDEVAITELDISGGGSNEYTTVTNACLAVPKCVAITSWGVSDTNSWRASTNPLLFDGQYKPKAAYNAV…
g3463	GH11(46-229)	GH11	N	CS pos: 19-20. AFA-LP. Pr: 0.3727	MVSFSALLATAAAAVGAFALPANSTEGFGLLQARSGTPSATGTHGGYYFSWWTDNAAQATYANQDGGKYQLTWSGGNGNLVGGKGWNPGTNGRVVNYSGTYQPNGNSYLAVYGWTRNKLIEYYVVESYGSYNPASAAAKKGSVTCNGASYDILSTWRYNQPSIDGTATFEQFWSVRNPKKNPGGAISGTVDTACHFKAWAGVGLNLGTQWNYQIIATEGYQSSGSATITVS
g3475	AA7(135-335)	N	N		MFRLGLTGKLGLRPRSLVRHYATPRRPPTPKLQTVNKPGVAKFWPWSPYWPYSWHARSGAQALILATAIVLATHYVDSALFEGSSTYGSAREIRVAIEKLKAALPGNDRVTTDPTILQTYGSSSNSYHPTSPHSVVVRPQSTEDVVKIVNISRECRIPIVVYSGATSLEGHYSGIKTGSICIDISGMDKVLQINEADSDLICQAGARWEDINDMLKEKGIPLFFPLDPGPGATIGGMVGTGCSGTNAVRYGTAKAEWFLNLTVVLPNGEVIKTRQRSRKSSAGFDTTKLFIGAEGTLGIVTEATLRLAPRLPTKVAMAQFPSVKQAVDAVQDILNSPYGANFQCVELVDDRMMHAINVGGYVDQPYPVSDTLFFKIQGSPESIKLAAKEAQNITKRHGS…
g3480	AA9(14-91)	AA9	N		IAEWGAKFNPFEFTAFNKNSLSAKIPSNITAGEYLVRIEQIGLHVAGSPQYYVSCAQIAVTGGGNANPPKVSIPGYVSASDPGLTVNIYNPVPTSYKVPGPSVFSG
g3483	GT2_Glyco_trans_2_3(550-770)	GT0	GT0		MDYDRWDALLHHIFKQTQGDAWFRPEEESLTSGVALRVNDSPPEFRVFPYENVYLEPFEAAVQKLNPVVAVKVRSAAVHAALADVPSDATSIYIDNNTRIQILETMLQLPQADKDQCAAFVRDERVLVIFTSSLDSIIPTCQDFEDRLIKLLWRSRPTGSSSTTGSLLPRSSTYTASATGHDSLPTSVSNHSSALVQPSSPALQTKVKVKRNWYGKKVGITAAKVPTREVKLYAPIYNGLAAGLALVFIGNGVKTLLREFLLDGTYMRFILCVTLPLLYCVSLFFALQIVQNVTMAIGPIAHYHTNSKYYSAIAPPPNDEIDNNLPHVTIQMPVYKENLDTVLDPSFASIKKAMQTYARQGGTSSIFVNDDGLRLLPMADRDERIAYYATHGIAWVARP…
g3487	N	N	CBM50	CS pos: 22-23. AVA-AP. Pr: 0.7755	MVAWNKLVTSVTLAVCASFAVAAPYPRDAKHITHHVRHLPRDLKLNTYHPASTFKIFGRGIDHSLSKRQEATLGEITTAFLAEELGLEAERVAYRTGIKGTMASHAYLRQAWSGIPFANAVANVAMKDNKIVSYASSFVKYDSIAPATPSVSIEDAISAAEAATLGSYNAQEPTLEYYMKDDNTAVLTHVVQVQNVLTGDWYEAFVDAHSGEVISVTDFVARASYLAVPFGDVTIEESGLELIQDPQNLEASPLGWHSDGTNDFTTTEGNNAVVFKGVGQQLLATSESSAGLNFNFEVDLTADPDAVEVNVDAARTNAFVISNTLHDITYLYGFTEDAFNFQINNQGNGGVGNDPVLISVQDASGVNNANFATPPDGQPGQMRMFTWTFTTPERDGALE…
g3520	N	N	GT0		MPIPAILLQQLQTLRPHSKFSGTPPKVQSSEGESFYVKVGGSGDVDQFIGEVESLKAIHEAAPGLAPKLLASGTENGRPYFISQYMNLGGLSDQSGRELGKRLALELHQYTSDKGFGFHVPTYCGATRMKNGWFGTWEECYSEKIKDLLDTLKTRGRYEELCKKGEQVRSCVIPKLLGPLDIKPVLLHGDLWSGNTGVDNGHPVVFDPSSFYGHSEADLAIARIFGGIPASFFKAYYEHLPKTEPVDQYELREFEYSEDPYNDDEAIFEDDEDDEYKEITQEDCWTIISSFFDQKGLVRQQLDSFDEFVQNTMQELVDENADLILDQAEQHSGQANDVSRRYELKFGQIYLSRPTVTESDGTVVPVFPQEARLRNLTYSAPLYIEMNKRVLSGREDENN…
g3522	N	N	GH71		MIIDIKLGVTSLTKTTTNAYSVAPIAMSLIRRSATKARPLFSNLRPRYASNWSRHTAYPSFFSHTPKPRFSFWSRRTLWVVPVAGGLTLFLTPEQKSFLPGLFSSPTIIPCHPERNTVTPTVYSPAELDLKILHRLKTFFLTKIWEPIRTAQRFLTLVTLFLPVLLTSPMLLVGKPERRLNGDRWGAVWWYKYLVTKMQAAGPTFIKLAQWAGSRADLFPSHLCERLGQLHSQGQPHSIRHTKKVISDVFRRPFEEVFEEFDEIPIGTGAIAQVYRAVLKKDLIPPSYLGPRRHRKTLGADVIPPSLLQDSPPSAPTAAVAIKVLHPHVAKTISRDLSIMSFFAHFITLFPGMQWISLPEEVDAFGSMMFQQLDLRHEAENLLTFEANFAPRKVPVTFP…
g3523	GT8(6-228)	GT8	GT8		MALPYAFVTLLTSDFYLPGALALAAALRDIHPSPSVEPEVDFQTVCIVTPETLDISTIKLLRKTFDVVVGVELITQEDDKGLQLLGRPDLYTVLTKLHVFRLTQYAKIIFLDADVLPIRPLSHLFTLPHEFSAVPDVGWPDIFNSGVMVLSPGEDKFTELNTLLKSRGSWDGGDQGVLNEWRGGDWNRLSFIYNTTPTAAYTYAPAYERFGSQIKAIHFIGPNKPWTSIPQRAPFSGDQSSTATSSQVYDFNSLLDRWFAVYDKHYRSKSIIPESEFAVRKYVAAWDEKTGTGAEFVSVADQQGGGPSAVLGLEDLRRLAIEGMSAAGHLGGNQSGEGEYRSLPLEGRVDLMAPPPAAPSHASQPTHHEPSVEHPTPDTTPVARHHNLPTPGPNESSPS…
g3615	N	N	GT48		MGPPTTNDWQVPPETDTDGMEPQWIAIDPVQRPATTDDSESKAPPTFQESQFDVILRRQRKRNNDCLKFTTTVPSRFLNLSNEFEFAGWGSVVHTALNPEDSLAGATRVRALRDQKVLGQFTASALAGNAVLGSVFYALPAVVGVASIYSPISLFIATMAIFLWRPIMEELGSALPIAGAPYSYILNVSTKSFALIGASLLLLDFVATSVVSAATAASYLAGEVTLPFPAFVGTIIVLVLFTLVSLSGIKESARLALAVLSIHVVTMIALLISSMVHWGKTGNGQLEENWNKYSAPSTAKVARQIFDGFCLGMLGLTGFECTPAYIARIKPGRLPLVLRNLHIPAIILNSIIMVLVMSALPLDAVLKADNVLSLLAEQCGGRWLRIWIVVDAIVVLCGG…
g3616	GT48(971-1745)	GT48	GT48		MVMNKLKRANQTIITTTEPAKTSAVTTSHRSNASKIVTTTSTVHSPSNEFDKTPRNAVEQYWAARALTAEALLKARTEHHRDLRAMTYSEGMKRERDRSSLVRANEEKLARMERLTWAMFMTIIFLCLLVVYVSLRTNQQKQKEHWFLPSHFTIPILSPFTSVVEQEASMIGSKIIIPTVLILACLVPLCGCTPVATLLDFVIFVCAPSFLLPPSMSGRPGHNSQEGYPSSSPSSVDAHQNDPFSPPARRYYDNDSEDYGRRDTYASGDSNTGFYDNNGAYDPYPPQDNDSDGDIYGQRYAPSAESLGVPRMGQSESSTPTFVDYNATAGGKDAYPAWSSERSIPLSKEEIEDIFLDLTQKFGFQRDSMRNMFDFLMQLLDSRASRMPPNQALLTLHAD…
g3623	GH16(283-606)	GH16	N		MSSPEELPPPRPFFFAGERGSYSSNESSSEDLPATSTRQSTRRSKRRSVDWNPTALYNDIPPTPTSATPLTNLGGSSPRAPPSSFAFPFQSYPGNPDPGMSIPGTSRRNSLDSLHSPNQTFSQSSHYPQYSDSPPEGHVPAPVSAPGSTRNLPRVASTATFRAPFLSPASRPSSSLWSPPSYPFLHGPDSPSASSTALANSLAKSKPPGPSTKIPGKLSKDDKPWMKKKSGRERGSWWITVFCILLGLGGAGVLVWTGLSSVQLIKDSDLCPVLDENWSNGITEDNWERDVQLGGFGNGEFQICTADSKNSYINNNQLYIMPTLTSDDIGGTDKIFNGYTYKVDGCSVDNATACQAKSNALTKNVVNPVMSARLTTKGKHTIKYGKVEVRAKLPRGDWL…
g3635	N	AA1	N		MVIYDPDDPHAALYDVDNDDTVITLADWYHAFAKTLTFPTPDSTLINGLGRWSEDPTSDLAVINVEAGVRYRFRLVSMSCDPNFVFAIQGHTL
g3656	CE1(1894-2075)	CE1	N		MGVQFGKFDSICETAALVICPLVGTDQGIVPTCYSRNVDIGGTLIFQPSTFFVHIVAIIMTAIMILHIRSKYTAVGRKEIVMFFWMYALIQLLGLFLDSGIIPTANAAYQWFSAIYVGLVASTFCCLLVNAFVGFQWAEDGTPKSLWALRIACLVVFGAGFFLAIATFRGIAGMSYEATTALWVIYILWPVVCVAVYIASQLILVFRTLEDRWPIGDIVFGTAFWVIGMVILFAFSTTICDAVKHYIDGLFFSELCTLLAVMMVYKYWDSITKEDLEFSVGNKSAVWEVKDPLLAQPDYDDDASNYHGQGNPGSRQPAPSLGWAVEDQVEAAPAIHLQQATESETERLILVPRLSRLEMAAAAVARIAYLASDVLIGVRPSFRRTSSFPSTFNTVAQSR…
g3724	GH5_9(276-570)	GH5	GH5_9		MASQYRSVPVSEDRAQDWRTEEDLIELYRQDGGAVVNHPGLSSAFSIARPSVSSTAHLNQEVDASTSSPILARQLITEHRKARNSSKHTKSKRRGPLITTDVLSNPRKRKILIIAACVLVVVALAVAIPLAVLSLRSDDSSQSSSSSTGPSKPAASPIVPWDGSTSGVNGSTAWFGNGSIFTYVNEFGGDWKYDPKDLLGPGGKAQSWSKRIGGGDEWVWGQDLIRGVNLGGWLVTEPFICPALYEKFINTSGIPVVDEWTLSLAMGDKLEEEMENHYATFITEKDIADIAGAGLNWVRIPLGFWAIETINDEPFLKKTSWTYFSKAVTWCRKYGIRILLDLHALPGSQNGWNHSGKAGTVNFMNGVMGIANAQRTLSYLAVLTELVSQDDYKDVVLMV…
g3749	GH43_1(6-325)	GH43	GH43_1		MSDAKPLITHVYSADPSAHVFNDKIYIYPSHDRETPIADNDNGDQYDMVDYHVFSLSDPPDGAVSVTDHGVVLKAEDVPWVSKQLWAPDAATKNGKFYLFFPARDKEGIFRIGVAVGDKPEGPFAPQPEYIPGSFSIDPASFVDDDEGQNAYLYFGGIWGGQLQCWEKPGVFDSSLLGPHEREGDVPALSPRVAKLSPDMLSFAEDVREIQILDPETREPIKASDHARRFFEAAWMHKYNGKYYFSYSTGDTHYLAYAIGESPYGPFVYAGRILEPVVGWTTHHSIVEYRGRWWLFYHDASLSEGKNHLRCVKARELVYDAEGKISLKVPWTAEGVETVGRLEDV
g3803	GT15(74-344)	GT15	GT15	CS pos: 23-24. ILS-FS. Pr: 0.2689	MNTVARYILFMLGVVVSMHYILSFSHEEYGRLTSLDNISASWRGSNADSPSLLVDIPITHFSPYYNSSAIHGKRANAVLVILARNSDTDNTVRSIREIEERFNKQFNYPYVLLNEVAFTEEFKERVSVLTSAKMEFGLIPAEHWYQPDWIDEEKATKARDQMVAEDVIYGGSVSYRNMCRFNSGFFFKHPLLQPYRWYWRIEPDVHFHCEMKFDPFVYMEENNKAYGFTITMYEFERTIETLWGHVKDFIKLHPEHVVEGNAMNFQSDNGGETYNLCHFWSNFEIADMDFWRSPAYQDFFNYLDAQGGFYYERWGDAPVHSIAANLFLKKEQIVFFDQIGYEHNPYTHCPRDKAAWKLGKCSCDRARSFDYDGLVGQPLLYAVSIFASVGMFLFGYDQG…
g3805	CBM21(314-414)	N	N		MIATITAQSSTMMMDHPFLRNANLAGAPLPHIPRRSASTSRMPLPAFPTSPTFPASPVSISVQNPTPPDSQEKVQKTSSATAIDEDYSSSSEASTSSSSSSSSSTKLFLRPRRAVVPPLALSPPPSSTPVPIKARKESKVRTKSPPTGNESDTPRAVPSATPARLQFGSPKQRHFSESRIADPGFKSAPAMTPPMVRKKSGQIVKSSLKLSRSAPRPGLSVFTGISSSKSEPNTPSLSKAVHFDKQLEHVKLFLAEQKPLAVSRDGSPTDDTSGTDSDFPSFIFGEPYGDKMSRQRLVMNVINMPSVVNLQADLVLETLLLSNDGTSIQGRARVRNLAFQKWLAVRFTFDAWQTTSEVTAKYVESCPDNFDVFGFTVKLNDLLARIEEKTLVLALRYSI…
g3817	PL3_2(35-225)	PL3	N	CS pos: 18-19. VSA-TP. Pr: 0.7365	MLSSVLVTLSLIATIVSATPTERRAPTSSFPSPPTTSHLSAPITVKAGKTFTPPTAYTRYDRGSGACTGQKEGGDKDAVFILEEGATLSRVVIGKDQAEGVHCLGSCTIEYVFFEDVCEDAITVKQKSGTTRINNGGAKHASDKVVQHNGGGTVIINNFYVEDFGKLYRSCGNCKTQYARTVQINDVLAVDGKLLAGINSNLGDTATIRTTKVDNVEDVCTRFNGNNTGKEPTKIGSGPDGKAILQVYDFRCY
g3819	AA14(23-288)	N	AA14	CS pos: 22-23. VRA-HS. Pr: 0.6331	MFTLNIHTLTLLTLASTLQVRAHSAFWHKSMYGFNVTEQTFPYDNRPVVPLRDMDFNKWWFHNHLDYPPNDGDIFELPAGKPATAEIACNKGATSFFASSEGGDIRDPNNLNDVCPGSPTTAYHTNGFDDLTGCGMAIAYKNDARDVKPEDFTIFSVNQTCVWTRFTEFQVPAKMPPCPEGGCICAFFWIHSEKSGGEENYMNGYRCNVTESTSNVPLAKPQIPRRCGADIERNKQFEVPANCTFGAKQPFYWFNNERNNMFEGAFSPPTYGDRYNFLDGPQDDIFEDSYASLPDPSPVARLPVLNGNSAGNVPSRAASRLRNPSSLRNPSTIVGIKPLAFIDHCPRASRLAGPFCIVFNHKINYISLILRADKLTAISPSYLPLTSRAPISMAAQTNK…
g3846	N	GH115	N		LEEVIEDQRTILSEAYGNVSIETIPQVWALYKEVEGYYEGGLRVPDDVTLLWADDNWGNLRRYPLEAERNRSGGAGVYYHVCSSSTCREA
g3882	GT20(132-598)	GT20	GT20		MIEDADSLLLFKSLDVDFPTVDSCPAATTMPFATMDSFTEPYTRAGDDISLDEVRKQVHQLEEQHRANGIPLSGRIIHVCHYLPVIAALNSRAGVLSPPATPPSKATEVPTTPTTDDVHHDAAIESAAKDSSSIWTLTSRYGHAAMISGIRSLSATHEQVIVGWTGDIASPVPNENVPSSTISDADKDALSEALLTYQPKESDPDDDRKTRYVPVWLDDKVAHGHYDGYCKQILWPLFHYLLWQDVATEYASADSHYPFYESANATFARRIAEIYQPGDLIWVHDYHLLLLPKLVRELVPEAVIGLFVHTPFPSSEVFRCLPRRKEILDGMLGANLVCFQTYSYSRHFLSTCIRVCGYETTPRGIDVEGHGISVMHCPVGIDAERVARDILRPGIQPKL…
g3901	GH32(89-259)	GH32	N	CS pos: 17-18. SLA-SN. Pr: 0.5420	MSRRLLLAAFAISASLASNMDIDSRQNSNASSCASSNXXXXXXXXXXXXXXXXXXXXXXXXXXXXXXXXXXXXXXXXXXXXXXXXXXXLWHLYYQYNPTDPVAGNQHWGHATTPDLWTWTNHPPAIAPENPGQGIFSGSAVVDVDNTSGLFNESIPREDRVVAIYTLHTPEKQTQDIAYSTDGGYTFTKYENNPVIDLNNTQFRDPKVHWDSQTSLWVMTVTLSQAYEILFYSSPDLKTWTELSRFGLHGLLGYQYECP
g3903	N	N	GH27		MSWKLHKFKPPSLTESICITMALFSLAIPGLYAFMFLAGLNSSPKLTVAAVEEDDNPWQGVGRLPFMGYNTWNAYYCNINEELIHETAELMVSLGLSDVGYKYVNIDDCYSERERNSTGDIIAHKERFPSGMRPLTDKIHALGLKTGIYSDSGWFTCQQYPGSFQNEERDAYLFNVEWGFDLLKYDNCAVPFDHIIKEGMVGKFKRMSNAIKDLAKTSGREPMLFSLFATMDLGERARSDMEVDQTTDDIGANWRSLAGIINQNSFHAWASDFYGHNDLDILEVGNGDLTYEESKTHFTVWAFMKSPLLISTALAKITEATLTILKNTEIIAINQDPVVGTGVVPFRWGVNPDYSYNATHPAQYWSGQSENGTLFMVINTLDEPADMFFNLTESPWIRA…
g3907	AA9(1-160)	AA9	N		MRCYELDSNTASQTGIATVQAGSTVGFHTTSSVGIYHPGYFSAYMSVASPSANSTNAGLGNTWFKIWEKTPTVNGRQLVFEQDLKDFTFTIPKSVPSGQYLLRGEHVALHSARSVGGAQFYIACAQINVVNGGSGSPGPLVSFPGAYTGNEPGFVVNIYSLPADYSGYTSPGPAAWRG
g3944	AA9(203-406)	AA9	AA9		MISQSSLTCRSREDLEDLLADNQYFQAVFSSLPRVKAMHQSQSELGMANEAIARNNLTLQESLYHLRSETREAFDEAKALENRWKELEKEQKDIYQRFTPQFLLMRLRHATTAQDEASEALATAFVQQQPSAPPASSGAGTPNGREIEDFVKEFKDLRATYHKRVMQISLASHGTSEARLASPEMLVLPSTLHSASSLMLFQHELWVNGVSQGHLTGIRVPDYDGPITDVSSNDVICNGGINPYRQPVSKTVIPVPAGAQVTAEFHHTLNGAVSSDSSDPIDGSHKGPVIAYLAKVSDATSLSVTGLKWFKIYQDGLSGGVWAVDKLIQNKGKVSFTIPSCIAPGDYLLRVELIALHGAQSYPGAQLYMECAQLRITGGGSTTPNTVSFPGAYSGADPG…
g3947	CE10(491-737)	N	N		MKAPLALLPVLGLSPQNPFQVPSSLYHIDSMVDFAFNQTADAFTPKDLVQLGRPGIGVANAAGDLAFIPYSQYSFKDKKNTKSLYIAPLTSTETQPLEIPLPQGGEAFWLGGTTLAHVVEADGKLDLYAIDIHHTTPSNGGADALSISQSPALLGSFPSTSATNFRFVPQSGQLVFSDYVYPDGDLASVKAKDEDWANRGNTALVYDTTYERHWDAWTGPKSPSLFSVSLFQDPDHLWHFGDKFANLLAGTNHSSPVEPFGGTDDFDVSNTKVIYTTKDPELPVAWHTRQNVYLVDILGGKPKELTGGDHGAVHSPVLSSDGKKAAWLQLDKDGYEADRAKIVIYDLVKDVRFTLTQQWDRSPDTLAFSKTSDFIYFTAGDEAKVKVFVLPIPATPPTS…
g3963	GH5_9(1230-1537)	GH5	GH5_9		MSTQEVLKAFGDDLDGKLVQECISICKLYNLSPNDLFYKWEASTSNFNTMFRTQTAAKFDMEAVVSLKATLQRELNDKKRQTPKMNRTAMVARNRMPVFGRNPMARAPATPQMKKEIVDVDMGDSTSTYTPSAVVFRAEESKRNQSYRYMYEKVLERSEILDDQIAQFGERISEHYGIKSLGDPASTTEEEVTVVGRISQDTEQTTSTKLDESTLIIDTSRNEGSRRVPVRFEPSLKIRGGVKGAGGLGFFPGMMVALKGKNGGGGWFSVSEILIPPPYRTRSVVSKSELKVDNSSFSACICCGPYTSDADLDFKPWRAFLSTLKEKKPTVLILLGPFVDATHKSIQAGDIDCSPLQLFQKRFTTEIRNYLDSAPGSIAILVPNTRDLISSHAVYPQGA…
g3988	PL3_2(128-243)	PL3	N	CS pos: 17-18. SSA-LP. Pr: 0.5288	MILASVLSLCLIVGSSALPRPRAASCTFPEATDTISLPEAMTIEAGQSFDGGNVRYDRGTACGGQAEGGDKDAVFLLDDGASLANVIIGADQSEGVHCLGSCTLTDGKSSRLLTKFNASRARIDSLLVWFEAVCEDAITMKQESGTSFINGGGAKGAEDKVIQHNGGGTVKVDSFCVMDFGKLYRSCGNCKTQFDRHVEFSNIIAQDGKLLAGINSNLGDTAIFDIATVEAIDVKSVCDTFEGNDTGDEPGKLTTNESNVSCQF
g4047	CE9(272-532)	CE9	N		MTSSTGSLYLDPQIRDWVLFPITLILVGILRHYVVQTLQTAPKKLPRAAIREQRALARSQILRATSANSPIPPSYYNSISKHLSDAFQSGTYLKDGGKETTTAPPNPLTDPAAMDGMMSGMKTQMVMMVPQMVIMGWINFFFQGFVLIKLPFPLTLGFKAMLQRGIETPDMDVRWVSSLSWYFLNFFGLNGLYRIILGGDNAASDALAASPFAGAGAMPAGQPQDFAKLFKAEKDNLAFSSAEAESYRDQDRTHNYTTFFTTMASSNGLVCFTNCLLSQEDGTLLEKDLWIDQQRGIILDAQKTFFQRNERPATVIDLGGNILSPGLIDIQINGAYGVDFSVFDGDEQAYKHGLENVAKKIVETGVTSLVPTIITQERSLYPTLLRLLRPLTAPKSASL…
g4055	AA5_1(32-574)	AA5	AA5_1	CS pos: 22-23. ASA-RE. Pr: 0.7397	MRYRLRFVLSLALAYGSQHASAREEHINRRAFVTGAWTLEQKGTTGVSAMQLAVVSETTAVIFDKVEHNPLTVNGHIAWASEVDLETATVRALNPVSNSFCASGSFLGNGTFVSIGGNPVVPPEGLDGLQALRLFTPCSDKTCDVQEWPSTLRMTSSRWYPSSVRVEDGSILIYGGSFGGDFMNAANLNNPSYEYYPPKNINGFNGTRIPSQFLVDTLNGNHYPIMVYLRDGTIFVAANTAAMIFDWKTNTETRLPDIPNGVRITSPFSAGATLLPLTPENDYTPEVMICGGSTMSDTVRPDTLSSQTPASAQCSRIVLTAEGIAAGWKTESMPEARVMGELSLLPDGRVFIVNGAQTGVAGYGNVGDRIGESNADNPAFTAVVYDPAAPAGSRFSREG…
g4066	CE4(611-728)	CE4	N	CS pos: 20-21. AYA-AQ. Pr: 0.3932	MSSNVLVVGLGAVGAISAYAAQKSGIANVTVVARSNYEIVKEHGIDIKSDHHGEHLGWRPNRLCKSIAEAADREYAYVIVVTKCLPEVLKTSTLLEPLLNVVYTERFKQPVYVLVQNGLGIEVELYEALKGKGETPRIVSVAMFILAKQLGPNIFQSGAQERYVSGVYRPNDFTTTENSEDERRTLDGFSAIMTKGGSAVEIVPEIQRRKYEKNITNVVLAGVNLLTRYPLTTIFRPPPTGDEDYEFHYFPGTQAFFEEFTIPMLRNMVKELILLARALGFPNSPDGLQDSAEDELIQFARDNYSLPSSFHVGSTLIDLQKDSPMEIEVIWGSVANDERPNPFYYQSPTMSVKSLVHSLILALAVSAHSLSTRHSFAAKHGAPNTGEIARRALPDGWSS…
g4160	GH29(280-523)	N	GH29		MGLSNGTTFRNYNITRMFTFQHHLDISKTLTAVVFPNQTTSSRLTGVVSIHVFSITLVSADEVSLPVEPLLNIQNVRSTTKFRVVDDSTVQLYEITLNNFAPTTAGPEAWITRNTSISLQSSSLTTVIPGHVQRLRGGDQVRIVVGVVNVDGVEPGTPISDVEVLIDGKKVGKCWDTIAGIPDYYVGDDSLKTHESAEWFDNAKFGLFVHWGIYSVPAWTISGTQYSEWYWYWQHNPANESSAVWKYHKEVYGEDFLYDDFFPHFTASDFNAAENSLIYGPKRDXXXXIGEIVNATKASHPELRTGLYFSLPEWFNPAFAKYGHGEDLYHPRGAPGTIGADILQRIGNAYNASEYEPYTGYIEVEDFLQDIMKPQMEALFYKYEADILWCDIGGDTIFP…
g4165	AA7(60-255)	N	N	CS pos: 23-24. AFA-AP. Pr: 0.3683	MRYQGHVLSLALTIATAKAFAFAAPAPSCQTLQESWTNNTYFPDDTLYTQLNTDFFTWLGPACIFAPTSAEEMSAAIKFFKQNSTPFALRGGGHMSIGGSNNIDASGILLASSGLTQIVLSEDGLTLEVGPGNRWADVYEYLAPHKLVVVGGRMGVVGVPGFLLGGGISFFGNEHGWASANECGSCVLANGDIVSATADNDYADLFWALRGGGNSFAIVTGFHLKTIPLPSLAAGESAYGPGVGTEFLDYVHDFAFNGANDPKAAIVPIARWGSGEAEPTYHSMLFHNGNTTSVPALSNFTEALTPNATTFRVRESMFNWTTEADGPFSRVHGMSNRFWIASIRADREAM
g4167	GT90(367-624)	N	GT90		MLRSRLSIACRAQHRLVALTFFAVCFGLAGYHNIFNIRTKTTFITRTALVNHRIPSATSSLARPAPTKTDLRRFRSNGLLEFTSGGKYEVHPIHDLILYAHEKWQRKLKRASKTLEQAVTEYERRYGRYPPRGFDKWCVLIHDLDILFRDRPCALNRWDYVRKHDVQLPDEYDQIFRDLQPFWGMSPEDLTRIEREFEGHNDSYTLGKGPSLSNPDADSSVIQIVNFSLPADKFDLLTEGAFDVIASLKDVEEHIPAFRAVFIPHDNPEHPSDWEVKQLALDHAAEGTHMDAFNTLIPTKYHGWISGCDPLTPAWSNPIDFTAPPAAPQFKSFIFDHRKAMDPCQHPTILRSHGQFLPWGRGPIPNEHLTPSFAYSPSTMHQDITLAHTVAWRDSAKKR…
g4189	CE1(34-286)	N	N		MAAVQLEKLSSNKTFGGELTKYKFKSAALGGLSANFNLFVPGGASESSKAPVLVYLAGLTCTEDNGAQKGAFFGPAAEHGIAILFPDTSPRGAGIDGEDADWDFGTGAGFYLNATNPKFARHYQMYTHVTLELPQVIEAAGVPIDWGRQSIFGHSMGGHGALTIYLTSQKLYKSASAFAPISNPTKCPWGEKAFSGYLQGGVEEAKAKYDATELIAKHAEPVHILVDYGTGDNFYKQGQLLPENFLEAARKAGHGEDQVTVRSQEGYDHSYFFISTFGADHIKFHAKFLNA
g4224	AA7(66-475)	N	N	CS pos: 19-20. AWS-AT. Pr: 0.7454	MMPSIFLLGFSLCVAHAWSATIPQICQDISASISNQSDVYYPGSVGYIRDNDHWASSSSQSSLCSVEPGTAEDVAAILSIVGATRTPFAVKGGGHTSNPGFSSTNGVQISMVRFAEVNYNEASQTVVVGSGLIWDDVYEALEEHGVNVVGGRVSGVGVAGFTLGGGYSWLTNQHGLTADTVVNFELVKPDGNVVNVTAGSDEDLFFALKGGLNKFGIVTRFTFRAFPQGQVWGGLMTFASDQIDKISKATATFSSDVRDPKANIISTYNFVLGQPGIVLLMFYDGPTPPAGIFDEFLAIPYFTKNVQTRSFLDLVKAAPAGVTAGSRATFNTVPLIANTAAVIDAVLNETKYWGANLSLASGLFFSYDVEPFQPNILTFNQAATAYPPTRSVSYLPLNL…
g4317	GH18(126-371)	GH18	GH18		MALGRLFHYAFDAVMVSTVLAGIRRSSGFTHLFNIRLDDAQHSGHVLEHWRDGVRSGSDEDNEHSVLQEGLEERHTMSPRGLWLPSSALSQELSLCRRTIILGQTILQCKHHAQPPRHDIDVYSSYWGQNSYGATSSNQAGWQQSLSYYCQDDSINAIPVAFLHVFFSTGGLPEINMANSCNAADNGVFSGTSLANCQSMAADIKACQAKGKILTLSLGGATGAAVFSSDAQAETFATTVWNLFLGGSSNTRPFGDAVLDGVDLDIEGGSRTGYIAFANKIKSLSSGASKKYYLTAAPQCVFPDAFVGEVINAVGFDAIYVQFYNNWCGLQNYANVNAWNFDVWDNWAKNTSPNKDVKVFIGAPAASTAAGSGYVDAATLSKIATETRSKYSSFGGVMF…
g4371	GH5_15(355-475)	N	N	CS pos: 21-22. VVA-LP. Pr: 0.8645	MFAHFSLCVAGLGLLASRVVALPVTSSLESRQSISVLTSSAVAAFKTYSYYASSAYCAPSATLTWSCGANCNANSDFKPVASGGNGDNVQFWYVGYDPSLRTVIVAHQGTDTSKLLPILTDANIILAGLDTSLFPGISSAIKVHSGFKESHANSATSVLAAVKQAISTYGTQSVTVVGHSLGGAIGLISAVYLDLQLPAATVSAITYGMPRVGNQEFANYVDAHISISHVNNRQDLVPILPGRFLGFRHSSGEKHILDDSSWVACPGQDNEDERCTTGEVGSIFEGDANDHSGPYDGLNMGSVSSKIYGVNLGSWLLVEPWMLPAEWIAMGGENCSDCSKCIRSEFELARAYPDSVDARFQKHWDSWFNEGDVQDLIDAGINTVRIPLGYWIIEALVDR…
g4410	AA3_3(4-619)	AA3	AA3_3		MHPEEVDIIVAGGGPAGCVVAGRLAYADPSLKVMLIEGGANNRDDPWVYRPGIYVKNMQRDGVNDKATFYTDTMQSSHLRGRQSIVPCANILGGGSSINFQMYTRASASDWDDFKMEGWKANDLLPLMKRLENYQKPTNNDSHGYDGPIAISNGGCISALAQDFLRASDAVGIPCSDDIQDLCSAHSSEIWAKYINRETGRRSDAATAYVHSVMDVQQNLYLRTNARVSRVIFEGNKAVGVAYVPSRNRGGKETIVRARKYVVLSSGTLGTPQILERSGVGSAKLMKTLDLEVVSDLPGVGEQYQDHYTTLSLFRVSNESFTLDDFLRGDKEVQKELFQEWETSPHKARLSSNAIDAGFKIRPTEEELKEMGPEFNELWNKYFKDKPDKPVMFGSIVSA…
g4414	AA3_2(32-596)	N	AA3_2	CS pos: 20-21. SWA-RL. Pr: 0.8506	MVPSSLWFLAAATAVPSSWARLYTSPSDLPRSTYDYVVIGGGVGGAVVANRLTETSSVKVLLLEAGVTNEDVTAAIIPLLGPSLVPNTIYDYNYTTTPIDGYNGRSLPYARGRMLGGSSSVNYMVYTRGSEDDFNRYATYSGDDGWSWSSMQKYIQKHESFVAPADFHDPTGQYNPSAHGTNGPLQVSLPGYRTVIDDRVLATTEELSDEFPFNLDHNDGSVLGVSWSQATIGKGAARSSSATAYLGSEYIDRPNLDVLIGATATKLGQTGKEKGLPSFHEVQYQTSPTSETYKVTASKEIVLSGGSVNTPMLLLLSGIGDETELGPLGIETIVNNPSVGKNFSDHPLLASVYSVNGDDSFDHVFRGDNLGLAIQEWITNQSGPLVNGVANHLGFLRLP…
g4420	AA7(49-276)	N	N	CS pos: 22-23. IHA-QS. Pr: 0.7753	MAHSHLLSSSLLVLALVASIHAQSSLENSLTAAGVFALFSDDAAYEEASTSFNLRYEFKPIAVTYPTSTEQVAAVVSAGYGENYQVVARSGGHSYVSNGLGGKDGVLVVDLSNMTSITYDGASGYATLETGLRLGDIAFSLNDNGRGLPHGSCPSVGIGGHAAGGGFGLTSRMWGLTLDTIQELTVVLANGTVATASNDENSDLFWAMRGAGSSFGITTSMVVETYPVPDHAIIYSYSWWNVDVETAADAFMSWQEYIVTDIPSELGIEAVLTRGSQAGLVSFSVTGGWYGGSEEALNVILEPFLSEVPAYSSRTISGDGTYIDTVRVLSGGTTYPNDTFYAKSLMTPESEPMSLEASTAFITYLANEGFTSRTNWFIQMEAYGGGNSKINAPDNIDSS…
g4424	CE10(145-269)	N	N		MIYDKTPHPYAHFEHLPFAKEPLKAIYVFQRLLTTLCLVPYWAVYYGSLPSRFRPRPSWSVKQIIYVNFTRRIYKVTEVAGVTFNTRDPELEPSASTLKETRFEWAPVLPDDLREGAVGEVYGRVPFKRVGIFVWPRHTSAFRDRVPVIGLFMHGGGYCHMSAHENSRTSNIPRRLMKGEHFSEIYSIEYRLLQHAPFPAAVVDAATAYAHVASARPDAKLVLIGDSSGGNLVLALTRWIRDHGKLPMPAGLLLLSPSCDISHAFPEVSSEYIARPNAETDYLTDTPEPRALLQRTFLGFKHRPKNLGWKRLQREGEDQMENHLRLSSLFKHTCKTGFKSETDNEQVEAEIEEEDRRLEDIIHSEYVSPASPKVLRRWGHEVDLYDGQKDRSALTTTME…
g4476	GT4(312-463)	GT4	GT4		MLLLGFATVVVAALLWTLVIPWSFLLLVSWYVRRVGIANRKKFLKDSGHPPDRRVVGYFHPYCNAGGGGERVLWAAIANSQRTEENVVSVVYSGDTDASKAAIMNKVYQRFGIVLESPNLHFVFLHRRWLIEDTTWPRFTLLGQSIGSMVLAWDAMTALTPHLYIDTMGYAFTFPVVSLVASIPMGAYVHYPTISTQMLRRVTAREAGVTNSSTISNSAALTSGKLIYYRIFMYFYSRSLSLPSFRMVNSSWTQYHIDSVLKYHEPIIDFLLPISFANFLFPARPVQSSIVVYPSCDTRAMSSFPLGGRPGVILSVAQFRPEKNHTQQLRAFADLINRVLFGAHLVLIGGARNDEDVQRVNELRRLARELKVAEYVTFIVNASFQDVLHWMSKASIGIS…
g4499	AA3_2(40-612)	AA3	AA3_2		MSLLFSLLTARKGLETDLSAVGVRADTTSHAATLDNHGHANYDVIIIGGGTAGCCLASRLSENSSVRVLLLESGGSGKGHIYTRIPAAFPLIFRNPKWVYQLYTEPQPFAGGKAKFWPRGKMLGGCSAINAEMAQYGAPGDFDQWAKVCGDESWAWKNFKTYFTKFESYGLNEKNPNVDLNQRGTNGPVRVGYFGRVYDTSLAFVKTCEAIGIPFSPDFNVVEGQKGVNRIITYVDDSRQRVSSQTAYLTPEVLARPNLKVAIHASVTKILFQDLSDGSKRAIGVEFANGPKAVVYQAFAKKEVILSGGAIHSPQILMLSGIGPAEDLQALDIPLVKNLPAIGSSLYDHPVVDVAFKDKTKKAPIFLKPSFNISEILAYLKAAVQYFVMGTGPMTTNLT…
g4515	GH71(57-421)	N	N	CS pos: 22-23. VLS-RL. Pr: 0.8117	MRLTLFVRVQTLALLFIPTVLSRLDQRSTHNRALSDPETLSNATQLELTKRGDTKYVFMHHIVGNTYPYTLANWKDDVAQIGAKGVDAIALNIGPDKWQRDQVRSAYKAAEGTNVKMFISFDYSVFDCSTASTTIEYFNEFKSSSSQFYYNGRPMLSSYAGSCLSSSEWRRMKAETGAYLMPFMWGLEGQFNDAWSFLDSWLCWGCAWPQTNEAKTTDDDRYYISQLGSRYATTVSMWMYTHYTWANKNFYQRGDDWLIANRWEQLVEMRNELTFVEMVTWNDWGESDYFGPFGGAQPEGTYWAKDFPHTPFFDLSQYYITAFKTGTYPTITQDAIYFWARPHPYWADASQDPIGVKPNGYDWATEYMFAVVLATSDATVTLGIGSYREDFQVKAGVSK…
g4573	CE10(100-233)	N	N		MVDPHLHDDLASKRETVAAHTRFGTITGGRASNGSAVFLEVPYALPPERFSDPVHLPEGHQYDVKKEYIYESSYGFQPHNDGQAGGVKFEDKVGLGKPTENPTFVNIVAPPTFPSKAGFPVKVYIHGGFLQFGSPHGLKSQNQYVAAEREEVHVSIGYRLSAFGFLACDEPKVAGNFGFKDQWIGLEWVRDNIEAFGGDPNNVTVQGLSAGAHSVHQILHHASRLPQGVNAPFQSALLMSNAIVLPPKTRGELRPQFEALCHALEIDPKSLTVLSALRDVHPEKICQVIETDAVGTEYGTYRGCVDDEWLAAESTAMDWQRSGKFAGALKEKGVKSIIIGETSEEWYLYSIAHPIQSPADIVPNLERYFPDSIVANAVAKYRTLPPDASPAESAKLFGD…
g4600	GH92(288-808)	GH92	GH92	CS pos: 15-16. VYA-SP. Pr: 0.6237	MLVPFALCSLSYVYASPSFPAASSNLNLVNPLIGNTGPEPNYAGGMIPSVAPPFGMTRWVAQTHQNWVSKTPYNWSDSEVIHGFVGTHQPAIWMGESGLVAVVPGQSTEPDGPVNALFEKRGLRKTPGSEVFGVSLYQVELGTEDGTIHVDMTATSRVGHLRFNFKAVSTAHPYILIQASRPSELFHSTPTSSHFNTSYPDGSVQVYPSERQICGYNTEMQDWVIAPVSNLAHVERQKREGTGHGGFKGWFCARFDASFDSFGIVQGTEEFPGVDEGSGPELSAYARFGYPEDISELTINVRIATSFISMEQALVNLENEIPDGVSLSQTELKTRAEWEEKLGRVQIEGGTDDNRTVLMTSVYHALQYPYETHEYGKYYSAYDDQVHEGVSYSGYSIWD…
g4650	N	N	GH38		MLEEMPPNGWEVPTLAPAVDKMKPVRLNPAGSKLLIDFFTNITSRPSKQQTEELAVQVAVRPFIHRVSTSIEIYKTLDNGHYSMQKIGLWFTTRRYNQKCKVQRGTLQDLSNVADASTGDTPTLPPKTKRPRKKRASKAIDISHHATLAVLCAEVCWTYSLSLRSVYQLRRSFAPSSVTLSFRLKKLIFVPCRIGLNIFSTYQSCPKMYRTPPPRRPRSSYSPIRSPQPEDPRRTDQEAPRPYSAFPSLPSYPELQRPAPTSVSGHNMDRRPPSLVDATQTGLPSPSSHAFHTNVNFHRGPRSAPGLASNVSSRSDSNVAPSLSQFAPAPRPSSRASTAMPSLRSFSDMSQSPAPSRSYCYDPSTTAASFSQRSMHSMASARTATSHTASSRASTFYSE…
g4654	N	N	GH3		MNDNLARIGQAEVFQSVSIERIVLPEDQPRSSSPMAQPRHQPMVTSNTKRAICPRFDMRRRRIPIRLTKDDSNTMQRSRTNSGASRTTSSSRRTGGYGSAXXXXXXXXXXXXXXXXXXXESLPGRGGGGGSRPASRTSRPSSRIHRPASFINRPASRTSQRSRGSQDTDYPTEDTSPSTKRKHRVGVDANAPLWDIYHQETTVSDRETIKGWTSSLESLLIITGLFSAVVTGFVVMEMSPDPNDSFASTLVKFLSLGPAAEALLEAVNIPLSIQRDLYNELXXXXYPSPPFFLATRVSSRSAEWERIRLRPTTTGTMGRNAQVQGRGMGVGPPIIDALVGHLLLLGFHHETMVVPSNLSICDHGVGGVIAGDIHGNDRHGCLQGNVXXXXAMMMVPKIF…
g4677	CE10(104-362)	N	N		MGRTRLEAQAINTQLSETERNSPAMKSKYAQVTFFDKVTVCGIIAFLPIYVGVIATLATFSRLLTPEKHRRTLLFFTFRYLTGSMTYNQFQWLAGTDDTAYDKFIKSSSGLPHSVDWVGEKTAKLXXXXWVGTKTLDKVIVYLHGGGYLFPLGDTHLAYMLSLQRELASRSTQVGVAVLSYTLVPEGIFPRQLRETKDAIDFLLKSGVKAENIVLIGDSAGGNLILQVLAHALHPHPSVPPFAHGVRFGGACLISPWVDLEGYSYPQTFKDNSPWDVISSKAYRYMGELVKAGVSASDIPYMDPLEAPKDWFVDLKGIVVRILLTAGEYECILEGQKVFYERLIADGHGDALFALHREGMHAEVMTSDPKTGKYPAFNDKVVAWFLETLNK
g4678	GH31(2040-2549)	GH31	GH31		MSELTLDTLADDGNFLGSERARIENQVILDELERKKRARTTAVPTDDNKVKLKLREIGEPITLFGERAADRRDRLIYVLTQINAARGDDAMQVDHDSASASEEEEEEFYSPGSLELLEARRRIAAYSLPRAQKRVAQQRIDSKMDLGRIVDIRKKVFNEVKKFANLGSQIGDDRPVSQVRFAPNNEVLATSSWSGTVKLWNVPACTPIKSLRGHNDRVGGVAWHPQATLSLSEGAANLVSGAGDGQVNLWSLNSESPVAVMTGHQQRVCRVAFHPSGDYVGSASFDTTWRLWDVETAKELLLQEGHSKEVYAIDFQNDGALVASGGLDAIGRVWDLRSGRTAMVLDGHVSAIYAMSFSPNGYQIATGAGDDTIRIWDMRFLRSLYTIPAHLSNVSDIRF…
g4719	AA5_1(34-591)	AA5	AA5_1	CS pos: 19-20. ALA-QT. Pr: 0.5140	MGFFRELATPLVIAATALAQTIPPPGQPLQKGSVGEFELVGDSVVSAQQLFLGTDDKVYIVDKVENNPTEINGHPAYASEYGLESNTARPMDIVTNAFCAGGNVMGDGTWLNVGGNQAVTYGGLEAESQTGGGAYDNPDGRQSLRLLEPCDDGKCDWTVFGDMTTRRWYPTVETLEDGSLIILGGCQNGGYVNDAGQDNPTYEFFPSRGEPVRSNILRTTLPTNLYPLTWLLPSGKILLQSNWDTAVLDYNTGEETPLDNMPDAVRTYPASAGTIMMPLTPANNYTATILFCGGTNIATDQWVTTWPIVEHPASTSCQKISPDVSPSYTPDDPLPVARAMANFIFLPDGKIFCVNGAESGTAGYGNDTWAIGQSYADKPTLTPVIFDPEAPAGKRWSSE…
g4760	AA5_1(20-627)	AA5	AA5_1	CS pos: 22-23. TWA-QT. Pr: 0.7501	MFSSLSLLAMTLAAASPTTTWAQTAGSFGDGGDSLVSAMMMFIGNEKMVYIMDKAEGNAAQVNGHPAWGSVWNMDTHEVTIQDIRSNVFCASGMHLPNGSFATFGGNAAITVGGNLGSELNPGGFSAAYDDVYMDYDGTKAIRLLDPCPAGSDFTSTECGWFDNAEVLSMQKQRWYSTAEPTGTGQIVLIGGFVQGGYINRNWPNVDPEFEGGAADCTYEYYPNSDNLEARTMQFMIDTSGLNSYSHAFLLPSGKMFVQANISTVVWDHENNEETRLPDMPGGVARVYPASGGVAMLPLTPENDYNPTIIFCGGSDMEDEMWGNYSWPFIDTFYYPASKDCQRITPEPLDGSTPAYEQDEDMLEGRTMGQFIILPTGKLLMVNGGENGTAGYADKTGET…
g4770	AA7(45-238)	N	N	CS pos: 18-19. TIA-RN. Pr: 0.8746	MSFLFLLLFSFLPCITIARNCCLDISNAGIRTSQTNLSYFSLYQAEVSPACVAHPSSSSQVAVIVQMQCEFAVHSGGHMPWSGASSVLAPGITIDLAELKDIEYKEETGLATFGAGLRWRDIYHHLSAHNRTVQGARNLDVGVGGFLVGGGISFPGDAFASGDVLDYEVVLASGQVIHANADEHTELFWALKYGSTNYGVVTRFTMKTSEIVDVWGGAQVFPSRTEHAEELLRNLVELTLGLGEEVREFMGVLLSDERIWVPRLLIGDTTRRRDFGLPAMVDTMRFTDRTNVYEEWVGDLKALERHQWYTLTIKPDARFALDIYGAGRRMFNGKGSFSVTFQPLPGHMFDDGEAVLIVLFMTTSVDVHLKELVQWTETSFPELVKPFVYMNYASSEQDV…
g4776	AA7(45-232)	N	N	CS pos: 18-19. TTA-RN. Pr: 0.8520	MSFLFLLLFSFLPCITTARNCCLDIANAGIRTSQTSLSYFSLYQAEVSPACVAHPSSSSQVAVIVQMQCEFAVRSGGHMPWSGASSVQAPGITIDLAELKDIEYNEETGLATFGAGLRWRDVYHHLSAHNRTIHGARNLDVGVGGFLVGGGISFPGNVFASGDVLDYEVVLASGQVVHANADEHTELFWVLKYGSTNYGVVTRFTMNTSEAVDVWGGAQVFRIEHANELLHNLVELTLGLGKEVREYMGVFLHGGIVWVPRLSLGDVRGDFGLPAMADTMRMADRTALYDGWADDVVKSGYHQWYTLTVRPDVRLAMEVFEQGQKMFDGKGSWSLAFQPLPGHMFDDGEAVLIVLFMTTSVDVHLTALVQWTETTFPKFVKPFVYMNYASGEQDVYRGL…
g4797	GH31(267-699)	GH31	GH31		MKFNDGFWLLKSGVKPYYALQVAKAEQTDTGVDLHVSTRPIRHRGDTLAGPVFSVNVHSPTEGVVGVKIEHFTRLDTAPAIPLFPDAPAINNVNVTRAEDGSYSLATAGLTAVVTQNPFTLTFKSPERILTSSGAKHVALYDVPFKWTLSSASNTSCLMNDIGSNPIPERAPEMVRYMSAELNISPGELIYGFGEQFGAFVKNGQTIRLWNQDGGTSSDQAYKCVPFYITNRNYGVFINNPGEVEVEVGSEKVSRVNMSVANSNLEYFVIYGATPLEILERYTRMTGRPASVSQVLEICKAQLTAFFPDSSPAGHLAFGSPRRSSHPTPARQFPDSCRYEWCSFTFDSDNFPDPKAYLSEIKQKYGVKICLWINPYISQLSPIFKEGVENDYFIKRKDG…
g4801	N	AA1	AA1	CS pos: 22-23. TSA-SP. Pr: 0.8934	MLSLHLLSTLSLAFSLFSSTSASPLVNVNVDVDHVVKYELVVSEGLYNPDGGKDRLVYFMNGKFASEMIAIDEGDTLELCVTSNISLPFTLHGHGLHQTGTPWMDGVPGVTQPMIQPGASYTYRYNVDQYGFYHLHAHSKNMQDDGLFMGLTVRPSLSRPAPFAQISSNAVDQTQLAAAALDSHPLLLADWRHYTSGEILKIWEESNIEPLCAKSILVNGKGSMVCPSAEELAPVAALKGLGNVTAMGCLSPDTPMLNPPTPGFGPESDISKMPVDMYETCDAENVGAPLHTVNVDNTLTSWAVLDFVNAGGLWEHRVSVDEHPMYVFAVEGEYVNVTEPVDAIVLASGMRAQVAIKLDKEPGTAYTIRIAANVAPQMISGYAVLQYASLDGTTAEFMK…
g4805	AA3_2(462-1046)	AA3	AA3_2		MRKILQAPLSPSSVSKDCVVQQLIGAFSYGHEPDSSYLELAKAVAHQTGEALQPGKWLVNSYPALMWIPKWMPYATFQKWAQNAKQSYEEMVRMPFNAVKQSTEQGEYEHCLVQRYLKLNPHRSKEEDLMVMYAAGSLFSAGTETLSAVILNFLNIIASHREIQDQIYNEIVDVIGHNILPLAPDIPNLPFLQDVIKEVHRVHPAVPLVPHSNTCEQEYLGYRIPKKSWVMGNIWAVLHDPSLYHEPHKFMPSRYQHDKAPDPRKFIYGFGRRRCPGASFADQFLMLVIARISTSFEILPIHEDMNDAMDFTAGLVALNLFASYYHHASFNFRCVPMTVHVLPTTTRKKNEEPTIDIHFSRCNRCRYSCAGNSPEIDQLNSSCCLRTVIWRVHHHRDED…
g4815	GT39(570-809)	GT39	GT39		MSVQIFGDQATEEKAENARLSSFVGALALGDLVKSTLGPKGMNKILQSASTGEINVTNDGATILKAIQLDNAAAKILVNISKVQDDEIGDGTTTVCVLSAELLREAEKLIAQKIHPQTIIEGYRIASVAALKALEGAAKDNFSDPTVFRRDLFNIARTTLSSKVLSQDKDYFANLAVDAVLRLKGSTDLEHIQIIKKVGGKLTDSYLDEGFILDKTIAVNSPKRLENAKILIANTCKAAMDTDKIKIFGARVKVDGAGKLAELERAEKEKMKAKVEAIAAHGINCFVNRQLIYNYPESLLTEKGIMVIEHADFEGVERLSLVTGGEISSTFDRPDLVNLGQCDLIEEVMIGEDKLIKFSGVAAGEACTVVLRGSTNQMVDEADRSLHDALSVLSQTVKE…
g4841	N	GT4	N		MRVAFIHPDLGIGGAERLVVDAALGLQKLGHSVAIYTSHHDANHCFEETRDGTLTVHAVSPPFPRSLRGKLHILFAHLSQIHLTAHILTSAPEYDVYFVDQLSTCIPLLRLLARKRVVFYCHFPDKLLANGAYVEGQMSGQGSFLKRIYRWPMDWLEEFTTRQSDVILANSRFTATVFKAYFPTIAVQPRVIYPGINIDAYEAAVDVSAPEIIQVGSSRPSFISLNRFEAKKNAALAVSAFAKVVHEISPRPRLVVAGGYDPRVEXXXXXXXXXXXXXXXXXXXXXXXXXXXXXXXXXXXXXXXXXXXXXXXXXXXXXXXXXXXXXXXXXXXXXXXXXXXXXXXXXXXXXXXXXXXXXXXXXXXGVQFWRSQIDQWTHAMKEIDALSGEERVQLSVRAK…
g4848	N	GT4	N		MSNPLKLSDVFLSPNAGPIEPHRVVKPFDPMDTMEYGLGLERGWLIDLLSRTSKYSDLIWDGMNSEVFGDLMRHRIALLPEPDVVDKVGKLFRRNFLECTMKERTHFLEVLPFMEYTYTLLPICDPVQLPIYVKDSDAQPIFEPLTIRTKIHPCFLLIKTACYGAMYHPKTRCVLDDETFRRVAWASIDGFGLVPMSWLGEDSPKYVNRPLVFAKQDLPPPIFGVNQTIKKQGVNLTGAGREKMKSEKLKTMDRINSDAPRQILAPSSSAKVEAQLSYEDRGVGGAERLVVDAALGLQKLGHSVAIYTSHHDANHCFEETRDGTXXXXXXXXXXXXXXHAVSPPFPRSLRGKLHILFAHLSQIHLTAHILSPSAPEYDVYFVDQLSTCIPLLRFLARKR…
g4881	GH71(113-541)	GH71	GH71	CS pos: 20-21. TLA-IP. Pr: 0.8051	MHAFIFFVTVTLFTLAHTLAIPIRRENEGSSNFILQLTVGRPTPTSSTSTTGTPTPSGTTMTVVNSSDSPSPSQTSSVPSSPSSSQSQFPTSTASTVSSTGSPIPSSSSQKAVVAHHMVGNTFPYTLQDWTDDIILAHASGIDGFALNVGRDDFQKQQVANAYQAAIESGLDFKLFFSLDMSSLPCGSTEDAQALRSWVQTYSSHPNQFVYSGKPFVSTFSGETCTFGQSSVVDGWKSQFVQHPDMAGNIVFVPAFFVDPATFSTFKDVMSGDFNWNSGWPVELTTDFAKTLSDGVTSTLKTLLSLGGVQSKLTEFIGSTETDEKHLEGLSNLSSGLAARDGDSPVYMASVSPWFFTHYGPDSFNKNFVFLGDQHLYARRWESLIASRDKFDIVEINTW…
g4898	GH18(155-526)	N	N		MPPIVTISNHTTSSAPRPHIRYTVEVTRNGTHNTVARRYSDFVSLNDTLQVTKYALPPKRILVTTFVPSAWIDDHLIAERKAGLQEYLTGLIQDPAYSDHPVLRDFLLKSDADPLRFNPEDAVPSTFSRKAALALVKGGLVSKSQVAAAATPIAAAYYPDWSAGNNPPENLDYSKFDILFFAFATPNSSSTLDYGGGSQDILRRLVSSARNSGRGTKVILSVGGWGGSYWFSQATSSADNRRTFSNALAGAITNFGLDGVDLDWASSEYPNSNGAGNPHSASDADNFLRLLQSLRQTIGSSKIISAAVPHRPWIGSNGSPLSNVSAFASVMDYVNIMNYDVWGASSNPGPNAPLGDLCGTSGQPEATAHAALRQWTAAGFPASKLLLGLPLYGYVSNST…
g4914	GH72(21-334)	GH72	GH72	CS pos: 22-23. VAA-IP. Pr: 0.7584	MRGISAAALVVAASSLVSNVAAIPKISRSGRFLVDESGERFYIKGVAYQEQGAVVASDDNAFGEPSTFVDPLSIGDACARDLPFLQDLGVNTLRVYSVNSSLNHDDCMKTFSDAGIYTILDLALPLNGSIDRVTPSWSGNIMDQYLRTIDTFSKYDNVLAVNVGNEVVTPDSLPAAPFVKAAARDVKAYLASKDSSVLVGYAAIDGATDFRVPLAEFFSCDSDAVAIDIYGLNEYAWCGESTYADSYEGIDNDYADYNVVAYFSEYGCISTSPRVWTEVEALFSEPMTDHWSGGIAFSYFPAESVQGQFGMVTIDGNSVTTSTDFDNLKTQYAAIAPPNSPTSGSDTYPTCPTALDTSTTLPGTPNDAACSCIFEALACQFTPPTANYTVILGELLNTA…
g4915	GT1(931-1350)	GT1	GT1		MTRIPTLQPFLHDPNAAPALNTSPEALGFDDLPVIKDKHGSPSGSRVKRLSSSIERKVDKLGRSISGKSSPGSPGAATGQRRLFSISRMGKGTDRADGQQSPPSSTPSTSRPTSPMKSTPPQDDSPFISPPSSPPVLSRPLLTPFRGDTSMRVGTQTLIQALQALPWTKDPDNDDEIMNHDQLTPSTDSESDEDDKTGRPPPHLASSIHTIYRPIARSRRHSLGPRRPGLPHYPSEDEHTSSPPSDEERSEDDGDDFELTTPRPTEAETPLAYKPLSSFARGGPMQKSRQGSMATVRLQRRAMLAEKLRDIYELDDIEEVHAEMPCWLLRSILLQGYMYLTNTYICFFAHMPSKEDQVLKSGSLSKKATRTKRWIRHWFVLKNDALSWYQSSSDPYFPH…
g4919	CE4(201-318)	CE4	CE4	CS pos: 22-23. VAA-HD. Pr: 0.6104	MRSSTLKSLSAVLAALPFIVAAHDDAGAHRRIARQETSPTTTGTGTTGTGTTTTTGTGTGATAPPPTVSTTYTFSLASSESTAVPLSSITASATTNTAAFPTLSTTYPAGAQPTLDNAPPLPELNIDISSYPPLDRTPPTDSDEVKQWIEEVKNSGIEIPNITPNVAGGCAANPQAATNTSNCWWTCGGCTRATDITTCPTKNSWGLTFDDGPAPYTPALLDYLESKEVQSTFFVVGSRVLSYPNTLRYEYMRDHQIAAHTWAHPALTTLTNDQIIAEFGWTRKVIQETLGVTPNMFRPPYGDIDDRVRAIATAMGMYSVMWTRISPTQTFDTHDFDIQNGAFTVEGVLQSWEFILGNASQLDTGFIALQHDLYQQSVEVATGYILPDAIAQDFDIGPV…
g5027	PL14_5(762-960)	PL14	N		MPDPNVESFDAGVWRAHRLLPTKGSASSTWQKVRESAPAFLRLSTELFSVNPSLFLVFVLSKLWMSWTYSHTITMYLSSRVLQEIEARRDYSATPPQFRNDTTLYTLCAFLVWLVSSEVITRTAQIFMPSFHRQMMSHLEFLSLQGAFREFDGSTTPEALLDSLTSIISFISNLNALLCQIALFLHTATELNDATLMIISFSGPLANYYFEANSESESPRFWYSRNRDYNRKKAMKAMTNDIYQEEVALNNLGKHILQEYKQSSEAVVTLPDDDPMFIQMEEDSCTPSLQIRHLFLLLLSKLPVIYSAFHAYTRPSISSVSSIAMIQTCSNSLDTVFTLTNHSFHGPFLQSCQRVRMIFTLLERKKDKDAGKLIYSPSEAGRGRSIEMQSVTFSYPNFE…
g5028	PL14_5(85-294)	PL14	N	CS pos: 20-21. TRA-AE. Pr: 0.8878	MLTLITLAVLLSILVSQTRAAESDPVAASYSLKPASLASLTLPSTAIPSATAAQKWIEENWGFVEGTSKNLAFVDDPYESANKEKVLRVEYKKGTYAEGPAGSGGVTSTYLNPFGEGVQRAMFTYEVAFSEDWDFVKGGKLLGLFGGRIGEACAGGQFSDKCFSIRVMWRADGDGELYTYNPGYKGFESKDDIKETAASYGFSVSRGSWKFTIGRWQKISLVVVLNSDPSSTSTEANGILAVHVDDKEIFTHDFFIFTTDSAVDITSIFFSTFFGGHTEEWASKGGFAYFRNMKTYYGTEAATGTADLETPLYPQ
g5045	AA2(31-262)	N	N		MRADADDGIPRVEDALNQTCMPWYGIRDAIMGRCNDLSRAAIRLAFHDAAPFSLALQASGGVNGAADGSIIADPAEVERRDNNGLQTIVSILRPLPAQFNVSEGDIVAVAGALAVLACPGGPVIKTYVGRPKFTTVNPDGLLPDTNAPVDVLLARFQDMGFDTRELMALIGAHSASKQRFVDTSRAGQALDSTVDLWDVRFYSETQRNETSEANTFILPSDRAFAHNSKTKDDYNRFVGFSRQSNWGNEYATAHEKMSLLGYDKNSLTECTEILPEEIDLEKLVDDDAGDPIINPAILEAAIQRTRSIWLV
g5065	N	N	GH3		MTAMAAWREMCPYHNTAMMVVPKIFSSLFGSLGAAGRWMLMKMPISILXXXXXXXSNIDLEKGSAESVSTFPLYRPHPRSDREEEFVEKNSNELEWNMVAWLLTTCRRSSSVNLALKSIRTLPYVPRKAYELLSTGIPRLLYSKILTDGEDISKEDEYWVAEETYEFTLSFIYILKCLALDGEGTDASLASSPTLFFSSAYGLLDETNMEVWTTYKTADTPPKQEPSLPAKNFVALISMETLFHHLHPQTKKQDDDPMVEMHALLDRHVTGKAPLDGRSLALLLDSLVYVLGRVKGAYVKHKALSLLVRVVRTLTKEDSLVFRPLVSCFKILLDGEAGTTVLREHMDAPRESRFVIGPGSGYKALFGVLRMISLSDVDDKLKSDIVWAAFSLTSTTATV…
g5119	GH63(577-1022)	GH0	GH0		MASDTVKKVQEKLFRGAPGVSQAQPSSERDPGLTINIPKPASSPAPPPKVPKATDSSPRHVDGLPEQAPYRDRLAAKLGAEYNGVERHRLIQDANRERHWKRWGPYLSDRQWATVREDYSANGDAWSHFPHEHARSRAYRWGEDGIAGISDNHQRLCFGLSFWNGEDPILKERLFGVTGHQGNHGEDVKELYYYLDSTPTHSYMKFLYKYPQRRYPYEELVSENQNRSRDVSEYEILDTDAFDDDRYWDIFVEYAKDEDDPENVYVRITSYNRGPDPATLHIIPQYWFPNTWSWPAEKPPMPSMSSSNRHGINCITAKHPQLSQKTHLYCLPSPPPVGPSGEFVGDPDDVVEPDLLFTENNTNYSRLYGGQNETPYVKDAFHDHIIPSHRPPASDSEEQ…
g5149	GH5_9(130-441)	GH5	GH5_9	CS pos: 19-20. ATA-KQ. Pr: 0.8997	MKARTLAVLLLSVAATATAKQCHLKLNNAAAVNNNPATPSQTSVTGTNANGNGSDGATTTATTSPTATATLAPFDYENDKIRGVNLGGWFVLEPWITPSLFEDTGIDAIVDEYTFGQLQDYDTALDKLTEHWKTWYTEDDFAQMQAAGINHVRIPVGYWSIPVTSSDTSFGTSPAPYIPGAWPYVLQALNWAKSHSIHTIFDLHGAPGSQNGYDNSGQRTNDPRFAVTPANVSRTIDTLAWVAENIGGMIDVLELLNEGAGFRGDGWAQGIRSFFNDGYYAVREAGPEGMKVMIGDAFLGVSNWNGFLSEGNGLLMDWHEYQIFSNGELSRSLEEHVQFACSYIPSVTEYANNNFWTIIGEWSNAATDCAKWLNGRGVGARWDGTRLADDTTYFGSCAT…
g5232	N	AA1	N		LSGAQTADTLLPSDSLFTLPANRVVELSIPSGGLIGGPHPFHLHGHVFDVIRGPGQTDYNFENPPRRDVVSIGAAGDNVTIRFTTDNPGPWFLHW
g5322	AA1_2(110-445)	AA1	AA1		MIDPASRRDAPWDEDDENTLLMTNFGENNLNAEDNLEKQPSKSHVSKLTISLTVLLLVLVVYLTVLPLHLWRFNGEDDSTLSDFLVVDTPRTRVFYWTVSEVINAPVGVDKPMVVVNGVSPGPTIEANLHDRIIVYVKNELEETATHGLYQNGTNHYDGSPGITQCGIPPGETLVYNFTLDGYYGTTWWHGHLDMQDTDGLFGAIVVHNSRETVPPYDEERVLMLSDVYNTRAVVLLEDYLNTNPTETIAEPVPDAVAINGVGQFSNCQAFPLQACNGDAFMNLKVSTNKTYRLRIINTGSFASIRFSIDSHTLTVIEADGTPVIPTEVDGVTLHVAQRYSVLLKTGNEPKAYWVRARLYEQMFAYENPHMNPETLGVLRYEHSPELTPAIEPPLPILG…
g5357	GH127(466-686)	N	N		MSRPPINPDKSVAGIALDPKTLERVIPESKRPDGTVRKQIKIRPGYTPQEDVKRFRGTKQAQMDSNVLPKGHVVGWAPPPASSSAQPLSKSAKKNAKRREKKDEKKTEVVQENWDDDDDAEPSAASKTPDTKPSAEAKAVADTSADTLASDLEKLERPNRRHRPQWTSPAHVRQFLLHVCLNRSLVAPKKYTTLPLGEIRPSGWLHDQLDVQSNGMAGHLHKFYGYVKNSDWIGGSSAYSSLEEAGSYWFNAMVPHAVLTEHTEIKEKTYEFLNYVLDHQEDSGWLGPESNNNRTRFLWGRYPFFFGAIQMVEYDPSLTSRVVTAMHKFVPLANEMLRKGEGLEIWTNTRWEDFVMALQWLYDYHPDGKEDLLIDTMKRLKWSGVPWEMVFQEEYFPKG…
g5369	N	N	CBM13		MARERAMSGTIPSMETSHDELKDNTIIIVLGASGDLAKKKAFTCPAFSRLLVLTICIVGYARTKMDQAEFHKRATSYLKNPNDDPEIAAKIQEFKAISTYVAGDYEDGTAFDALNDHLLEIESKYQSKECNRLFYLALPPSVFIPVAKNLKEHCYVARGGLNRVIIEKPFGKDLESARELLGSVKQYWNEDETFRIDHYLGKEMVKNILVLRFANVAMNAAWDKNHISNVQITFKEPFGTEGRGGYFDEFGIIRDVLQNHLLQVLSIIAMERPVSFSAEDIRDEKVKVLRAIPPIERSDTLLGQYVSANGKAGYLDDDTVPHNSVCPTFAATTLWINNPRWEGVPFILKAGKALNEAKVEVRIQFKDVTQGIFKDIARNELVIRIQPSEAVYLKLNAKT…
g5406	N	N	GT13		MSAPPQEPVAIVDAPDATKSAGATLHYTPSCPLTQDLAKKEAKRKEKEAKLAAKSIKNVAKPTSEKKVKVEKEKKVEEAPFVNTTPKGEKKDLSLPMSAGYDPIAVESAWYDWWEAQGFFLPKLTLDGKPVSEETFVVPSPPPNVTGSLHIGHALTTAIQDSLVRWNRMLGKTTLFVPGFDHAGISTQSVVEKRLYKSTGQTRHDLGRERFLETVMDWKNDYQARITDQLRRLGGSYDWSRTAFTMNESLSKAVVENFCRLHEDGIIYRANRLVNWCVQLNTTLSNLEVDQIQLTKRTMMNVPGYDLKEKFEFGAITSFAYPIEGSEEKLIVATTRPETMLGDTAIAVHPDDARYKHLHGKFAVHPFVDRRLPIVPDEMVEMEFGTGAVKITPAHDQND…
g5408	N	N	GT0		MLCRFLSILCFFIVLSWLFTRKQNFQVAKTPTTALFVNLNDTISAQSLTAILPVSISHLSALPDTLIPFLSPSKLHEVVILTPESKMAATRAIVRDFVSLLEDFPHPDFSIRAWPNHLTQPVATLRISSQIMSDWILILDDSGLTNIAEDTRRMLLNPPPVDYPLGPRGMQRSACLTQTASPQPATYLVPPFVLPRILAYPPSADLDSEYWLNLGVHVSTTKESSYGGIALSLDRDEDSVWCSQVCHHDSAQQTASPGNVTDSFDLYPQYSSFSITDEPILVLLLPFLSDLEAFISVPCKLQETGFLVFVALYAPSLTNQDHHANFGACVLQYVVLSDPLSYLAYLRHTLKREPNVVLSLDELEPENTNVPWIGIPREDLAYSTWMGSLSLLEWQNWHR…
g5410	GH13_25(1-249)	GH133	GH13_25		MRNEGFNIDIDVDWETGLIFGGNRHNCGTWMDKMGESEKAGTKGVPGSPRDGAPIEITGLLKSTLRWLDQLSTSGKFPYKGVKATLNGKAQTVSYKQWSDLIQKSFEKSYYVPSDASQDSQYDVVTGLVNRRGIYKDVYRSGVGREWSDYQLRPNFPIAMTVAPELFDPQHALDALTIAENVLVAPLGMKTLDSSDMQYRPDYDNSNDSTDAAIAKGLNYHNGPEWGWPLGFFLRAYLHFDTEVGDGKTCRKCRPDSFDFMHSTLIRLATGAVKSVAEPASQPFKRAQLGLFQGKSKQYGNNVPFSKKKTRRTWLPNVQSKRLWSNALEDFVKVKLTTRALKTIEKYDGIDQYLTQASLPKDLSHEGMRLRVLIQDAMKRPKIDMSLPEDLRRRAQALR…
g5411	N	GH133	GH13_25		MPKSKKSSKNKPTVSIPKAKKSSSSTSPSSASPVTPVTPKTPADEGIEFFQSATAPGESPIRVYELRLDTDGGPHKDRSYIRLPPANVPYILRVSMNAGTPAAKNGIFKTNFPLDGGKFGRDHFCERKLPSDFSKPIQVDLPISQAGAFVFWVEYDGETTGDRVKGREGYFNIDPVLHTKARSSILSSDSRPLPAGEGAXXXXMSIFLSMDSPSSRWSRKAQERGYTMLHYPPLQERGESDSPYSIRDQLKYDPGLFKAGRATDGGIAKIQEILKVAREDYGLLSLTDVVLNHTANDSPWLVEHPEAGFSPANTPHLTPALELDTAIIEFSSTLVTKGLPTTINTSADVEALMQAFEVVMRELNLWQYYVLDVKREKESVKASIESNKITHWSGPDVRG…
g5414	GH5_9(221-527)	GH5	GH5_9		MASSDLDPPRASYLGVDGNSSQASPADSMTVLPKSEQTEEQSTKKSWKKRPVVWLIVLGALVVVILAVVLPIYFTVIKDNNSSSSSSSQDSTGGNSTGTGNGNGSGDENDPDDTNTSAPISGGDGSRITLEDGSSFVYENKFGGFWVSDPSDPYNDGAKPNSWTPALNETWTWGTDRAFGVNLGGWFVLEPFISPALFERYPGAVDEWTLSQLMPAEELEEHYATFITEKDFAEIAGAGLNYIRLPIPFWAVDKLDEEPFLERTCWKYILKAFGWARKYGLRINLDLHTVPGSQNGYNHSGKGGQINFLYGTMGLANAQRTLNYIRIITQFISQPEYANVVGIFGFINEALLYDIGRPVLTSWYKEVHDTVREITGVGSGKGPYLSVHDGFEGIMTEWD…
g5419	AA9(10-224)	AA9	N	CS pos: 21-22. VSA-HS. Pr: 0.5433	MKFSAASSLLLSATFFGLVSAHSREWSLYVDGVDQGQGQGKYLRQPPSNSPVKDLTSNDLFCNVGGTTAVSGSVSIAAGSTFTSEWFHDNRGDDIIDGSHVGPIVVYLAPRDVAPGEASWVKIFEDGFDGSQWAIIKMKNNGGKFDFQIPSTLAAGDYLMRIELVTLHEADTLFTANAARGVQLYPSCNQITVTGSGSVNLPDGVAFPGVYTDSEPGIFFNIYNTAATQYVIPGPAVWDGQTGGSAPAPASSATVPTEEKPVETTTAILTTVVSPPTETSLAAPTATQAPAVSTTQVAVPVPTGKLTDANECMRYYNKCLDATQPKPDWNGCGATRDVCLQTATYNYNMNRIKRDGKFGRLL
g5498	GH5_30(46-465)	N	N	CS pos: 17-18. VNA-SL. Pr: 0.6498	MHALAILTLVASSLVNASLLPTRANSAASATSSFITESDGQLVLNGSAYPYLALDAYWLATLVDEQDVIDVLSNVSSIGVSNVVVPAYNLVNENNVPSNDSEETWLQLLHPNGSVTFNEGDTGFKRLDRLVKYAKANDIHIDFTLSNNFDPRALIANQSLDDLTDTFVNGFNTTRPRNFLRNDFGGADFISATLGSTAHDFYSNQTIINVFKTIVEDIIRRYKDETAIGSWTPVKDAGCGGSLPQTATCDTTVISSWHNDITEFIQELDPNHLVIASTTGFECDQGSADCPKLFTPTAPPPPPPQVSPAPGARRSTRTKKQVQLERKEKTKKARAVERARSASPAEGVRIRGRWISFGNARRQSSNDVVSEVTDGSTGVDSVDLGNSAVGGLTSSYLPF…
g5527	GT8(37-297)	N	N		MAPRNQATIHPGDEFIRRGRSLFSLVSPVSLFTMTFTMNAAWVSLLSKTEYLAGLLVLDYGLKAVGSRYPLVVMVTETLPCQARDILRRRGLRMIEVGSIRPGSTCESFDQADCRFSDTWSKIRTFELVDYKRVVLLDADMVVRRNMDELMEMELGKNEIAAAHVCACNPRQRPHYPPDWIPANCPHSAVPTPHSPPPTWCPGRPRPYAELNSGLVVLNPSLSVASAILARLSSPSSCHKYYFPDQDLLSEHFRGRWKPLPWYYNALRTLRAAHPRMWDDEEVRCVHYILADKPWMERVPLGATGVLDEVNRWWWDDFEGLGRQMRKMDPEGWKAVERTVAPQTF
g5600	PL1_10(69-238)	PL1	N	CS pos: 16-17. TNA-QV. Pr: 0.8914	MYHWKIFLLAVGGTNAQVVGYATKNGGTTGGTGGTTTTVTAVNAFKTSIQTEGPIVVYLAAPISYAGQASVASDTTIIGVGTEGVINGGGLKIDDKSNIIVQNIVINKVVGNDGITIQESSNIWIDHNEFYSDTSHGVDYYDGQLDITHGSDWITVSWNYFHDHYKSSLVGSSAGNEDEDSGHFHVTYHHNYWKNVHTRTPAMRFAHGHIYNNYYDTIVAQGIHSRCDAQMLVEGNVFSNSKEPLSTYGLVIPEDSPNTSPEGDPEDNGYVNLGAANDWGTGAINITATGSFSSVDYAYELTPAVDLPSVVIAGAGVGKV
g5654	N	N	GH17	CS pos: 20-21. GSA-IP. Pr: 0.8372	MATNYLSLAYLLLLAVYGSAIPIVDIPIIGSTNISLANSAMSCFPALGFSMPSWVPSSTNGWWCDPSTEYAFVGFSYEVTECQSKETLKREFKDIRNKFSGRYVRLYGACDRAGFYDDVIDAAWEATVGVHALIWFGFDNSPIWQTRRNQLFSTLHTNPKAKFVTRLLQFGSEPLYDGVLDVGTLAGQVWAAKANLQGLGIPVTISEMAWGYQKNGGAQPILDAVDVFDIHMLPFFAQQASTAWNSWGLVLNDLNWFIQHGNGKKIYMSENGWPSVTSPGVQPNSPNAVANVGNEADYFNLLDSKCEFFKTVAGGGVGWFAHIYADGQEPGYGIYDVYWREKFWFRPRTTC
g5689	GH5_9(84-389)	GH5	GH5_9	CS pos: 24-25. AYA-FN. Pr: 0.8269	MPFSPLRATATALYGLSLLSSAYAFNPTFPYGREKVRGVNLGGWLVLEPWITPSLFDNTGNNAIIDEWTFGEYQDKGVARAKLEQHWNTWITERDFADIAAAGLNHVRLPIGYWAWDVSAGEPYIQGQLPYVERALGWASAYGLKVIIDLHGAPGSQNGFDNSGQKLSYPTWHTSQSNVDRTNAIIKTIAAWYKDRADVVAVVAPLNEPAGFFGDDVLRVTRQYWYDSYGNVRYPYGSSRQSDNLVLVHDAFQDLSYWNNFASGLDGVAMDTHIYQMFSPQENARSWDEHISVACSKGNSLSSFHLWTIVGEWTAAATDCAKYLNGRGVGARYDGSYPGSYHIGNCAAFTGSGASFSSEYKEFLRKYWEAQVITYEKGAGWIQWTWKAEYADEWTYQAG…
g5699	GH131(20-286)	N	N	CS pos: 18-19. ARA-TV. Pr: 0.9330	MTLLFPLFAFVLLTVARATVVFEGRVPLTLNSSVLDTSASPFTTGVRGLEAASHYTSFLGTAIPPTALEFESDDDQEQAILITIDATSIFVPGGSTPQYGFRRTELIAPSALNVELNSGKTEFHFSLQVDEELPLDYRHEYQIVFIEPSDGSHVFGVQLGTPFTIPAASDPAPDATSLKILDHANNILFTTPFTEESWHNFAVTVDWDALTLQVSYSQDGDALQTVTDVVPNPTVAAGTTGDFHFGVLKLPLANPDDTPEEQGDVVNHGVQEDTLEGLRYSGVFVTK
g5715	CE10(599-831)	N	N		MVTAPEESIPTKEEENEEIDNEEEEEDTQAAPGTNGEAAKKKKKKKKPKKKKVEQSDPPRIGLTKFFPSGVYPEGEIQPYKDDNTWRITSEEKRYDERMACEDPETTYQNIRRAAEVHRLVRRHARKTIRPGMSMIEIAENIENGTRALVEENGFESGVGFPTGLSVNNCAAHYSPNPGDTKILQQGDVLKVDFGVHVKGRILDSAFTMNFEPTYNKLLEAVQAATNTGIREAGIDVRLGELGAAIQETMESYEVEVNGKVYPVKPIENLSGHSINPYEIHGGKSVMLVANDDQTKMEEGEYFAIETFGSTGRGRVVDSGECSHYAKVKDGPRAQLRLTSAKSLLKTINAHFGTLPFCRRYLERTGESKYLLALNNLVAQGVVQDYPPLAVCYCMDLLS…
g5829	N	GT31	GT31		MSSIPKAVLYYSPDSVWSSVVLLALDEKGYGDDEYDLKIVDLAKGENFDPTFLRLNRKATVPTLVVPLENSLSGEVESRYKALNQSRAIVDLLDKSRSSLSRTHTTSQAPAMALAPATVAFSTTTNSLLDLIHSDEANPNNFLYLNATDDASLKILAAKMTPYLTSRRDALDRYLGDDSLNVSEKVKTFWREKRDATELLLELYSDGQTPTSDLPAAVQAKRAELFATSQSARETMKDILVKISTEIFGPYTLGDQFSIVDLHLAAWLTRILSYADVDAKDDGDVATEKLSKYVGGVFTPEQTTKVGAYWEAVKGRPSWKKVTSRHHAETPPLPSVMLSDDYDNGSTDSDDTARLHVPSMYRPPPSPSPRSTFLFLPNSPGQNSTASTANSTPNISRSS…
g5846	GH18(152-505)	GH18	N		MTTTTITSVFIDKHTTSSTPDPHILYTVEVSLADGTKYEVLRRYSQFASLHALLGDPYSLPPKKSVVNAIVRSAWVNDNLIAERKDGLLAYLNALLRSSQFQGSSSLLSFLSPAFVSLIDAHDDVITPSMICKANLTLLPPSQPQAAAPIAAAYYPDWCAGSLSPYSIDFSKFDVLFFAFVMPNSASTINWDEGSQDTLRQLVAAARQSGHGTKIVLSIGGWGGSYWFSNSMSNANNRFKLVNALVGVVNSFGLDGVDIDWEYPNAPGSGNPHSWADSGNFLSFLQTLRSALGWARIISAAVTHNPWLGPNGTPLTNVSDFAAQMTFINIMNYDVNGASSNPGPNAPLGNDCGTSKQPGATAKAALAQWSKAGMPASKMLLGLALYGYASKSTATKLSG…
g5898	GH105(203-443)	GH0	N		MSRASSVPDDFFEEHTRAFNISYVLSPPGPSRWKAVTLTHHHAGVALRSAQIRITGYVAIWNFCSHRVFSNLARAALLSTGTAAVPTPTSGTPYTGIISNAKLASVKANMLQVSEQSWELGTAAEALLEYSWPSLSVFNESAILPPTTLARFQNASDVLQIASEVVANKSSNSLTLMANSAVGDPPSLGVAVLLANWTREDLYDTSYSTAAGEQLDYLLNDAPRTTSGAISHREEEVQLWSDFIYMVPPFIAYFGALAGGDSELALIQEAYDQISLYRDVLLDDSGLWKHIMLGSWSDENHWATGNAWAAAGMLRVLMTMNHTTQAEHFEEQSANLALWINEITESAWRYQTDTGALRNVIDDTGSFVDSSATALLAAVTYRMATFTGNNSLVDAADNA…
g5925	CE10(99-259)	N	N	CS pos: 17-18. VTA-AS. Pr: 0.2327	MYFQLLVAQAAITLVTAASISARGGPRVRLDHGIFTGIQSGKVSKFLGIPFAKSTAGESRLQLPEPVDAYSGFYDATAFGPSCVAKTSEGPPTSSLPSETIAFLLQIAAFSTDNPTSEDCLTVNIVKPASVKAGAKLPVVVWIYGGSFQTGGTAGFDGSSIVSRSLELQEPVIYVSLNYRLNGFGFLASKEVKDAGLGNLGLRDQRLAFKWVQKYIHAFGGDPSKVTLWGESAGAISIASHMVANDGDTEGLFRAAFTQSGAVISVGGIENEQQAYDDIVNRTGCTGAEDTLACLRTVDFDTLKAAFDTSSEFAWLPRTDGSFFSDFPQHLVSQGKVANVPLITGNCDDEGTTFGIGLNISTDAEFKALVQLAWLPTAPEKDVNRLLDLYPADPAQGSP…
g5953	GH79(89-475)	N	GH79	CS pos: 22-23. VHG-EI. Pr: 0.9638	MMKFAKASVISTLFLAFTTVHGEITTYAQQALEPTSTSTGDAAGYTGAAAYDPTVLEPPPIPDPLPPMAFGIQLQTGGTPGVSIKQKGSFLGFSIEMSVSNQALGKNSSYIAVPFLNLMANIQQRAGEVRVRVGGNTQEMAKLVDSLPDGRMLAKDIGNSSNPTQTPPLDYTTDLFVLMKGISDLVNVRWFLGIPFFQTNPFDIAIAQSSQIILGDHLIGLQAGNEPDLYSRHGHRGSDYAPQNYVDEFGALVSALGTGSTRDILIGPNLANADWQPQQIWETGFVDTYSENLAFLAVERYPTDNCYQQFGIGQYRDPQETFQDFLTHKAGQDLAGQYIDSTSYAQEKGKEMLMFETNTASCGGFPGISDSFGAALWGLDYGMQLAYSNFSGALMHMGG…
g5971	N	N	GH13_1		MENILQSGTMRTLILVHLTQGRRRLSYMLPLLRVNHLLHSITSYYIYYHIALQHSWDMQRFLASDRKQWHHVRILILYRPVSQQVILDMLPHMSNLDYLHITDIVGGNECMGRKDIVQSIRLSELSFKRAEWTGALVTFVAAQSKLKRLELDEVEFTSSHSRSIDLPTLGQFIGTTSLLPHLSGMNGLVALDVVSYTSLSDLKCGLVPTLRHLTFSRNPPPEDDVDALFQLIARRCPFLTQLVGICLPTHDRTPIHQALIYMKDLTMMDVGFTRWSVTVLLGKMVASELKTYATGLQSVSFVLLP
g5972	GH13_1(57-369)	N	GH13_1	CS pos: 22-23. ASA-DE. Pr: 0.4348	MVGILRACILFALARLSLAASADEWRSRSIYQLLTDRFAIQGDAGAICDPSKGLRCGGSWQGVIGHLDYIKDLGFDAVWISPVVSNLEGGTKYGQAYHGYWTRDIHSLNSHFGDADSLKELSAALHSRGMYLMVDVVVNHMALIPNQPGGEIQSNADFNYSSLTFPNAEDYHPFCWVEDYNNQTQVEQCTLGDSNVALVDIDTENPSIVEQFNDWIHGLVGDYAIDGIRIDTVKHVRKDFWPDFVKAAGVFSIGEILIGDVDYLSPYTQVIDSVLDYPGYFALVSAFSKPGGNLAGLIDIATQTQSKYKQGAFMTGSFLENHDNPRFQSMTNDLALVKNAMAYSFVTDGIPILYYGQEQGYRGGNDPNNREAMWLSGFQTSGMPLVSHVQGLNKARKLA…
g5988	GH28(42-376)	N	N	CS pos: 17-18. LNA-QE. Pr: 0.8025	MIGRLSLLLALSALLNAQENCTITASGGDDSPQIKEVFSTCSTVLIPEDQNLLLGTKLDTTGLQGTHVRLLGTITLKDDVDYWRDNAFNVSYQSNSVAWMFGGKDVVLDGEGTGTIDGNGQTFYDARIANDSLRPPHLLLPYNSENLVIRNLKIRQSPRWTILVHSSKNVLIHDLDIRSRSNTWALGRESNRETDGVDIYNSSYVTLHNLRIDNGDDCVSFKPNVTNVYVSDIWCNGTHGVSVGSLGEYDGVKDIVSNIYVNNVTILNSENGPRIKTWAGASRGYGYVDQIVFSNFEHINNDSPLTIDNCYKTNPDECLANPSNMTISNVYFTNQYGTASGKYGNIGATMVCSTGKCQNIHVDNLNVTAPSTCGDTVYTNHHVNIQGNAAYRFISDAVT…
g6006	AA9(6-226)	AA9	N	CS pos: 18-19. AHG-YV. Pr: 0.5547	MKFWTILLAAVTGVAAHGYVPQIKIGNTYIPGWDISKDPYATPRPLKVVRGTKLDSGFISDVNSPDITCSIGNSALPTGPISATVAAGQTVSLLWNTWPIGHFGPVLNYMAKCPTSDCSTYKGDTGSPWFKIQQDVFKNGEWASDTLAKNNFTYTVKIPSNIQAGSYLLRHENLALHGGNNVGGAQFYPVCVQLMVTGGGSLAPSGLSFPGAYKATDPGILFNVYQGNAANEAYVAPGGKVYPGLT
g6031	AA12(25-411)	AA12	AA12	CS pos: 22-23. LLG-AP. Pr: 0.3759	MVRNILLALLPLSCFAQVQLLGAPFRSPVTNAPGFDSHVIYSNVTAPRGISLDAEGNLLVIERNSGIAAFSLTADGLGWERTVVAANAAVTHGIQVFEDKLYFSTASQVLAYQYNAATKTITGAPTVLVDGLPADGELTTHAILVTDSSLLVGSGPLTNIDLTARDPNSGRSQIRRFSLPIQGSTPPDFLSGQLVAYGIRNPAAFVYDTGTSDLLVVENGASIDDVEGITPEFANDNPADELNVVTTLGKSYGFPDCSTIWNPDLLPQYADLEQGDQFSLNLEDGETDSWCRDFVNNVPPLLPFQAHSVPLDIKIMPAQPEGTINIGGISQSFVGDYFVSFRGSFDRTPPTGYGVVRVDSDSPNSYAFVVQATNINDCPAAGCIRPVGLAWDAVSARLY…
g6109	AA3_2(32-590)	AA3	AA3_2	CS pos: 19-20. SLA-AI. Pr: 0.7531	MFSALSFGILFSVISLSLAAIYDDPSQIPRHRSYDFIVVGAGTAGNVIAARLSENRNTSVLVIEAGRRYAALVRCYTQTQSEYSDVGYDSDLISIPFLGPQASPFTSFDWNYTTVGQVALQNQVITYPRGYVLGGSSSTNYMVYTRGSSDDYNKFAELAGDDGWNWDSLLPYALKQEKHVPPNDGHDDSEEYLPSLHGTNGSLLTSVYGFAADIDDIIMATTKELSEFPYNPDYNSGNMLGVSYMHSTIGGPYRSSSATAFLHPALEQHPNLDLLYNTHVTRLVQHGEKCDLPLFSQVEVASTSSSPRFIFKAKKEIVLSAGAIGTPQILMLSGIGPANELNAVGVQSIVDLPEVGKNLVDHPLLPMQWRSNSNNTMDPILRGGQAFDDAMVEYKRNRT…
g6110	GT20(195-675)	GT20	GT20		MTSEISSSSSSLSPMSSNSSLKSRRIIIASLFLPNTVVLGADGSGKTTPESPRSPRKTKSRQSSMNSVGGTRELSMPEIVLRLQQDKDKPAASSRPVPKSIVEDLKDRARKTVGIPLSSVAENINPFSKVNTAANTPELSRPTSRDDVVPPLKSPPPRSPSQRRLKRDHSRSLSRRSQSNLGAGEFHVEPNGHCNGGLKNAIDSVSLNAARPMLKRKLWVGTLGVETDTWSPSLRQSIHTRLREGGYESETVWVEDAVFEGCYDEFCHQVLWPALHYAVPDAPKTKNFYESASFRHYVDVNQKFADSIKKVWQEGDVVWVNDYHLMLVPQMLRAAGLAGPIGFFMHVAFPSSEIFRCLAMREKLLRGILGADLVGFQTASFTRHFRQTCSRILAVEALP…
g6116	AA3_2(34-608)	AA3	AA3_2	CS pos: 20-21. AFA-VV. Pr: 0.8799	MVRSATALAVVLAAAAPAFAVVYENIADIKGVDAYDFVIIGAGPGGSTVANRLSEDPSLSVLLIEAGGANDGDITVDVPLLCTRLTPNTPYDWNYTTIAQPGLNNRTVPFPIGFGLGGSTSVNCLVYTRGSSDDIDAWAALTEDEGWSWANMLPYFMKVVSLTIELNFQLMILQSEKFNLPRDGHDPTGQYLPEFHGTDGVIGVSVPGYPRAIDGRIMNTTEELSEFPYAIDMNSGEQLGVGWVQALIDTGARSSAKAHLTGPASARGNLDILLYTKVSRVLPTNVTEDGVKSFRGVEVLDATDGSFKALYAKKEVILSAGAVNTPNILLHSGIGEAALLESLGIEVLVDLPSVGKNLTDHVGVSSTFIVNSTETWDTVIRNETLLGSWLDEWRENRTG…
g6160	AA3_2(1986-2590)	N	N		MDITPDTSLMDVDENDDSFYLSQPPATQGPKMGWQSTQPTVLRKMLEHNSKSSATYKTKGREPMPQIQSNPLTPSNAHEASHRPRARTAMTRVPSSSQISEISRDSLSLLNAQVTNNTLRKRDMIESQRKAMGDQRRTLSSTRTSRTSTPPLSGSSREAPMDVDMSSSSMPPSRTVSSSFINTGTSTSTSSFTRNASAGSLPAMQSFAVPPQRPSPPQQTDRRMTASKPPLIRQVSAKPALTTPQPQQRTTPSRPTPQLGMRPRTGANMSQQKPFRSPFLRTETAPSKPEPKPIPLPVDDPDSSFEFPSFDYNMPPRRSSRSRASVEPESSTLKRKRPQEPSARTSRASAKARDFIPEVPSSDEEADDPDVSSPPVKKKRPSAEPDDQQQEQQDEDEEE…
g6196	AA14(21-286)	N	N	CS pos: 17-18. ATA-HF. Pr: 0.5969	MLLWLSISLSLVASATAHFIAFANGMFCKGGLSGNDQNSMDGVRPAYQLPKEEWWMSHFTGCDSHPPPAGEFLELPAGGSFTVELAPNQATTTLSFDGSRIGLFGDGKAHAKFEGDHSGCITNPNLHTERESMAAGTAFAISYQSELKNVTPENLVVFSVAPRTPWHRVAIYDVPADMPACPPAGCICAWGWIPNGCGEPNMFMFPYRCTVTGATSTRPVGNPVPPVWCEDDASKCISGPKQMLYWNQASGTNIHVAGEDLSGKPKSPGYNEKCGFKPGAQNDIFAAAAGRSRRFAKDEW
g6197	AA14(22-291)	N	N	CS pos: 21-22. VQG-HV. Pr: 0.6926	MADRKFLSASLSIWFCASVQGHVLAFKEGMFCKGGLSDDDQNSMDGVRPSYQLPKDEWWMSHFTGCDSRPPPDGEFLELPTGGTFTVEIASNQGMTSLSFDGERTNVFGDGEAHPQYEGEHSGCITNPNLHVEKESMAAGTAFAISYHSELKDVTPENLVVFTVAPKTPWHRIAVYDVPAGMPACPPGGCICAWGWVPDGCGEPNMYQHPYRCTVTGATASARPLGKAVPPVWCEGDPSACVSGPKQMIYWHQASGNNIEVTGEDNDGRPKAPGYNEKCGFMPGAQNDIFTATIPRCALLPRTVQRSRSQTSAEXXXXXXXXXXXXXXXXXXXXXXXXXXXXXXXXXXXXXXXXXXXXXXSQTIMHLRSLKLHVPHHFPFGKAKKVEASTPIPLTAIAS…
g6208	N	N	GH27		MELVDYHCNITEDKIVDSANLMISKGLVDVGYEYMNIDDCYSEKERDVDGDIVASGLRFCAVSVRNEKPYRPAPWVRNENRHRKRVHRTNCSPISYLFKYGDSGWFTCQLYPVSFRNEERSDIVKSQSTLPSPVHRDAKLFRDTWNFDLLKFDNCAVPHDEVVKEGMIGRYTRMSNALTDLAQTTGRPPMLFSLCEWGRLQPWLWAKRLGHTWRTTDDIGANWTSIAHIINDNSFHSWASDFYGHNDMDSLEVGNGKKMNYEEYKTHFTAWALLKSPLLIRTDLRKISNNVLEIFKNKEIIAINQDPVIGTAVTPFRWGYRPNYSNDPKHPAQYWSGESQNGTVIMMINVHSRPTHLQFSFSEVPWLRAGRQYAVRDLWKHTDKGNFVRQFTARNVPAH…
g6223	PL1_7(129-308)	PL1	PL1_7		MVMVWRNAFSSPYSLEVRRPGRSVTFCLKLSLEGPHYKSGSARRVSSVHRATAMKYITAFIAFAFFSLVSAFPVEQSISKRASAADVATLGYATLNGGTTGGQGGSTVTVTTLAALTSAVASDSAKIVIISGTITGNTVVKVGSNTSILGAKGSALVGVGLRVLEKSNVIIRNVKISKVLADAGDAIGIQEAHNVWVDHADLSSDLDHDKDYYDGLLDITHGSTGITVSYSKLYNHYKGSLVGHSDSNGAEDVAITVTYAYNWFYNINSRTPSFRFGHGHIYNNVFDDNNDGINTRDEAQLLVENNVWTNAKKPLYSTDSGYAVAIGNDFGGASNTALNGSFTNAPYSYSLTATGSARSLVTDDAGQTLTF
g6228	N	N	GH93		MDGDSIEVLVYHNATRYAFVASFTISLYDILLTFEDELTWVWMRRWSLGKVLFLMNRYIPPLVIACNMYSALCPPNIPLLSQAHPNHQLSNLFCIINHLQRPMHHRHPEYAPFHHIYYLSTSDSDPCSPNYANQPVYSPTHKELTPPVVIFVLAGWRYIQTSRSRRNTHLEPELGPHATLNDGLPLTSSAGRFSILRSRSSHCYSEPVIDNLWTTLIDPFIRRPDSGIALCSLFKTILAPALMPSGRPGTITRIRVIDCYPSGSNNVLAAXIGVRNMGNAKWSGAHAFFLHTVGDHALIDILRSIQANYFLRHSSTSVSAHHHPNPHDAGHHRPASFIAEKIVGHGTSATTADVSNPAQDPAQFADGDEKMLALTWQGKGKVEMVETFKPKIIDPRDVV…
g6231	GH145(48-333)	N	GH145	CS pos: 22-23. VWA-AP. Pr: 0.8940	MLLPSAISFLLAIQCLFLHVWAAPGVSLTSNTRLDASGVYFVSYDGLVNVNAFQLSGLLTYGSYQYAAWYTSTRYAILGRRNVGSSTWETLQLPHTLSATDSHNVIALGVSPADGRIHVAMDTHSTRLYYTVSSANVAGTDTTWSTSLFGSIVNTLGNLNVGSVITYPQFVVTPSNRLQFVYRTAVSGNGDCQLAEYNSGTWSNVGLWASKSGTYTAPNGAQSSARNLYIHGFTYRDSRLHVTGTWRENSGSVSCSSGGLTNHDTVYVYSDDSGRTWKNAAGTNVGTSGSSPFTVNSPGLVVDSLNADHGLMNQESQDVDSKGRIHTIISYVPGRFVQCVSSYASDRTTNARPFHVYQASNGTFVKMEIPFAINAVGRSQIAIDASDNVYVVLPYARVV…
g6233	AA9(23-231)	AA9	N		MPFEKDCYLATAGSFLEMIFAVLASLFVLPLVAGHYTFPGLIVNGQGSADWQYVRTTANHYSNGPVTDVRSSAIRCYEIDSNAASQTGIATVQAGSTVGFRTNNGVSHPGYFSAYMSVASPSANSTNAGLGNTWFKIWEKSPIVSGRQLTFESGMQDFTFTIPKNVPSGQYLLRGEHVALHSASSVGGAQFYIGCAQLNVVNGGNGSPGPLVSFPGAYTGNEPGFVLNIYYLPADYTGYTPPGPAVWRG
g6261	AA3_2(6-588)	N	AA3_2		MASSDAFDYLVIGAGSAGMVVATRLAENPDASVCIIEAGEDLTSQPNYLIPGLSAAGLRGPTDADWKFYTTPQENAKGRSIWTPRGKTVGGCGTTNIVALGKGHATEYDTWESLGATGWNWKNLAPYFKKSETFTITEEESAETGMKFNPELHGSEGPIHRTLPKWKTNAMSPVGQALEAVGVSKSADSYDGNTLGLYSLQLSVHPEHVIRSSSANAYYVPNKDKENLSLLTGAQATRILFDRDEAGELVATGIEYSKDGELKTISAKKEVIVSTGSYKTPQLLELSGIGEKKILEEHNIPVLVDLPGVGNNLQDHYTASFVVEIDEQYDSLDSMMDSAKAGLEFMLYQEKKQGKLTTNGASQYGFISNHTYMSESASAKVISSAAKVVASSTNPTLKS…
g6264	GH17(133-402)	GH17	N		MASNGNNESAALYRNEGMAYALEKTARRRRRSKWINQAIGSLIALVALIAIGVGVGVGVSKSNSNKNNSSSSSSQSGGSDSDSTSGSGGGTSQTDPNDPSSFTKDSNLHKAFYGIAYTPEGSLLPDCGNSLDAVIKDIQILSQLTGRIRLYGADCNQSALVLEAIQQTKVDMQVYLGNYPDVADDTVYTRQRDTLKSALETYGADHVAGITVGNEFILNYVTDNGGDPNDSVGNTAGRILVANIQDTRDMIEGLNLGKTIPVGNSDAGYYFNDLVLAEIDYGLSNVHPWFAGVTVQEAAQWTFDSFNEVNVVPAAALPNNPKMYIAETGWPTDSKEAATLNNGGSDASVPNLQVFIDDFVCKANDDGVGYFFFEFTDEKWKDDMFGGVEGHWGLFNGDR…
g6266	GH16(163-500)	GH16	N		MASSSTSYSTSSPAPSARVILGSAPSSPAPSVNQNPFDDTHRILYNSSLQTSQSLRLRSTLLPISLSNSTDKDEQAALAVPKPWASKPNTRQKMTYVLVYGMILVGVAVSAIQCYFTYKNVLLDKHPMCLIMDEPFDRSEDEVFGPNGFFMREVDASGFGNGQFDMTTSSSKNSFIRDGMLHIVPTLTSDEIGQEAVFDNHIYNLTDCTFNVTAPNNGFLIQGDGTTAGSRKFDYPAYYRACSAASNASTGAVISPVQSARISTLLSAREGRGGSIKYGRVEVRAKMPKGDWLWPAIWMLPKDNVYGTWPRSGEIDIVESRGNGLRYTARGSNYVQGALNWGPNPAMNAVQKSFSWWTERRESFADGFHTYVLEWTDEFIRMYVDSRTRTLLSFKFKKP…
g6267	GT2_Glyco_trans_2_3(534-744)	GT0	GT0		MSSAASITSAGVTILNSDYDAFDALLHNIYERTLPNNWFIHQSSTYSTGVCLRVNASATSHDANATPGSTFRVFPYENRALYSFEENVRKLNPAVASIDHLKSIRTDHTPRQGSETSLQIDKSTRIQVLDRLDQLPLAEKEQCGAFIRSDDSLILWSYDVEHIIPLCQEFEEKLIKYIWRTRGAPKRESNAPLPAGSPFGTPVSSPRIASFVASSSNLRPLPEHVIDDEDEKVEAVGPKPSRKAKWWNWKLDSPTPPKTDDFDPEKGGSAQTKHQRKQVLLGPFYAGCGAALATYFVGAGVSILLEEYLMDGNATRFAMCVTLPVIFCVSIFFCLQLVGNISLVIGPVNQYHENSAFYSAIKPLPNPAVDNHLPHITIQCPVYKESLELTIAPSIFSIK…
g6274	CE10(96-461)	N	N		MSPSTNTHVPAPYWAAVSPVCIPLSMCNRAADLLIDWFGPEELKHVVGGERWWQVRGLDGVDAEWITEKEYLSDVKMDSEADLSDDQEDILRMESLDRVMLYVHGGGYFWGSINTHRYQIIRYARKFKGRAFAVNYRPGKHLSIHGRAQYKMSLLLSTDFYLTDPPPSALHKPIPPSKIVFAGDSAGAGLALTVLTILRDMKMPMPAGAVLISPWIDLTHSFPSIMTNTPTDIIPPYGFLAKPSPLWPNELLPPSTGRVRPASTSPPPKPGHADTLQPSTERIISDAEAKDEDRPGVPQEEMLKDDQSDSPTKNADISVDSNLWEPKPPKVLMKDPKSVPLELCSQIQLYATTEQLSHPLVSPVMQGSLGNLPPLYILAGDGEVLRDEIVYMAHRAAHP…
g6293	AA9(8-238)	N	N	CS pos: 18-19. VSA-HT. Pr: 0.6515	MKFSVALASAAFFGLVSAHTREWSLYINGADQGEGAGRYIRQPPTNNPVKNLKSNDVFCNVGGTSSVSGSVSIPAGATVTSEWFHNWRNDDIIDPSHVGPIVVYLAPRVSLNSLLLSSPAKNVQSVTAGQAKWVKIFESGWDGSQWAVIKMKNNGGKVNFRIPQNLAPGEYLMRVELVTLHEANDLYSSNSLRGVQLYMSCNQITVTGSGSVALPSSGVAFPGAYTDSSPGMQFNVYDYPASQYVMPGPAVWTGANGFARDDIDSQENSKRDGKFGRLI
g6365	GH152(26-161)	N	N	CS pos: 19-20. SSA-FT. Pr: 0.7692	MKLSLVLTALASMVTSSSAFTIRFQNNCGYTVWPAIGKAPNGFPDTSVSYGTRLASKASASFSINDREVGIRAWGRTGCDSNGANCATGRCNGGLVCNDAGITSAVVLSEYGWGDYGQWGGQRISWNLSKVSSSININTRLSSSDGQSVACTTSSCPPDXXXXLSRIPSANQSFNTTNSPKDLRK
g6391	CBM63(65-131)	N	N		MRNLSSRNWGDGNSRRYECPECDADHLDVFETVAPRIDADYQTKGVFEISWEEIPCSVSGGIQLKNKEGANSYYFAMQPRNTVHSVQSLEVYTGDSWTRINREEYNFFVNYSGFGDNVAIRITSNTGETLTFENVAIGDGTIVYTSSQFTA
g6507	PL1_7(88-267)	PL1	N		MSHLYLWQAPTSPFSFLNTTLSLSFDFLSLSKMKWLSSAVALIAVQFAFAAPSLKRRADAAEACPVGFFSTLDALIDAVSGDDAKIVIIDGEITGSEVVKIGSNTSLLGTSSASLVGVGLRVIRASNVIIRNIAVSKVLASTGDAVGIQEANQVWVDHLDLSSDLDHDKDFYDGLLDVTHGCTGVTLSNNHIHDHFKASLVGHSDSNAAEDIAIRVTYFNNFFENLNSRGPSFRFGQGHLFNNLYNNVSDGINTRQGAQLLVENNVFVDSKKALFSTDAGFAVAIGNDFGTSTNTAEAGNIIAADLGYQYTLLDTASPLPLRDPHNPIAQRPSSRPVGKQTLSLTSWNIQASQWPPRPIERSELILDHIFKGPKFPDIILLQEVASSVRQSLLSDPRVR…
g6522	GH114(100-288)	GH114	N		MLSHIKSFWHALAPSDAKCIPNPSPRASIKTNGMPLKLETYRPPIMHVHLFIALSFLLLRALSTGTIIKLRATPVLPPAGGIFDYQIGGAYTPNSAVQIVTRDHTNNIAPNKYNICYINAFQTQPGDTSWECTYPTSSPTPATLNIPPPADLLLKTDDGENVEDPDWPGEFILDTTTEEKRTRLAGIVNTWITGCKDNGFDGVEFDNLDTYTRFDALSVDGNLAYAKLLVDHAHSLGLAAGQKNTVEVAERAKSEIGFDFAVAEECQEWVECDGYTDVYGMLVLEIEYDRQAFEDACDARATEASVIFRDVNVVPRGEDGYEYAICE
g6544	GH5_50(92-377)	GH5	GH5_50		MDRLKNKFLKTLDSLEKEFMGSGSTHSAPVAPIPLDLNNPATYFRYRKQRGVNLGAWFVLERWIVDAPYRDAKDPGQSDLDVAKGKNAKAILENHWDTWITESDWKFLSEKGINTVRIPIGYYHLCGADRSVLEKTHFKDTYDVFCGAWTRILGAIQTAASFGIGVLIDLHAAPGKQNHDSHGGTSKEPEFFHTSRHRDHTIHVLLTLLRLINNAHPNIVGIELLNEPAPPSDTLLKDWYSEAIRAISSQDPTIPLYLGECWQTDNYAGWMKQIQPSVPNMLVLDHHLYRCFTGEDISTSAHDHAGHLRDPNNGIVQTLGRVGSSLVIGEWSAALNPGSIKFDNDVEHRVFANAQYELFERTCAGWFFWTYKKGDGWDNGWSFRDVLQSEVLPAWLGGM…
g6570	N	GH16	GH16		MFRRSVEGGKFGSGRRRGVGIESPRRQGGTLMKRVSAVFRSSSVDTSVSSSEEEESTDNEIRRPSGLGRMVVEEEDFAEDHDLDDIDEAEVELQYAWKAPLTSPRRQYHSPRAPPTNLEKPVPPIPFPLSADTVKQILGYIPRTSLPIYARVSRTFYDAANAILYGTLVDPPSAALRADRAELVRSLTLTTFTPYSYSHSSQMNYTLQLERVLPQMSSLTSLTLPYFDPDLLRQHSAFGLKRLVLMNEEMSVDEEDELIGWLDGQINIVEVSWPRLRDLQPREEEESQNFLAPSYSPISQTYTTAPNSPLTPAHPPGIPFDFPHSPIAPSFTGSNSPITKKACYGSPTLLPSLKYLHGPPPLVERLCQCPRPLTHLTLTLSQSIYDGFRPAGLMRALPS…
g6595	GT33(43-560)	GT33	GT33		MTTTLNGISLPNVILGAVLGFLTWRIVALYVFFRPRDEHSIRSVAILVLGDIGRSPRMMYHAQSFAENGFQTDVIGYGGSKPIPSLERLPLIQLRYLHQLPKILTRLPFVLFAPIKIVHQILSILLVLLVTIPKPPEFILVQTPPSIPSLVIVALVGKIRGCKVIIDWHNLGYSILALKLGQKHIFVRIARWYTISFAPCHDSSITRFRIESFFGRRAFAHLFVTRAMRDFLVNEWNLQGEKVVFHDRPPRQFHRCSPQETHDLLVKINHVWKQPKALDGWLPECSVPYSTPFTDTKPIADSLEDPIAVPPSLPALGIPSRKNPFQATVASSNPPVFGAPTPARVAPPHLRDDRPAVAVSSTSWTPDEDFSILRDALRMYEERARVSDGQLPKLLMVVT…
g6646	AA5_1(53-556)	AA5	AA5_1	CS pos: 19-20. ASA-HL. Pr: 0.8026	MSSRFFLALSLVLHAYASAHLPEHHLQHRAVVSGPWSLEQRGSFVQPNSLFSERNALTVDGHFAWAVEVDLVNATVRALNPLSNSFCATGSFLSNGTFVSIGGNPVVITGQNGLQAIRLFDPCSDRICDVQEWPRTLRITSPRWYPSSVRLEDGSILIYGGSTSGGYINSQRVNNPTYEFYPPKNINGFNGTRIPSQFLVDTLNGNQYPIMVYLPDSTIFIAANTRAMIFNWKTNTQTPLPDIPNGVRITSPFSAGATLLPLTPENNYTPEVLICGGSTLSDTIQPITISAQAPASAQCSRLLLTPAGIAAGWQVETMPQPRLMPEIVLLPDGRSVIVNGAQSGVAGYGFIRNPIGQSNADNPAFTPVIYDAAAPAGSRFSSEDIPASPIPRMYHSSAT…
g6648	GH71(1-331)	GH71	GH71		MRVFISFDFNWWSASNAAGVGSKVAQYGSRLAQLKVDGKVFVSSFAGDGLDVAAVRAVAGMALYVVPNFHPGQGDFSNLDGGFNWMGWQNDGNNKAPRNGVTVTVAEGDRTYRSILGGKSYMAPASPWFFTHFGSEVSYSKNWVFPGDFLWYSRWNDILASSPNYVEIVTWNDYGESHYVGPLSSKHTDDGGSKWVNDMPHNGWLDMARPFIAAYKAGETSVNRHITSDQIVYWYRPTLASINCDSTDSTMGPADNSSGNYFNGRPNGWESMSDSVFVVPLLTSAGTVTINSGGTLYRIEASAGASAWSVPMGRGSQSFALSRRGAEVISATSLKEVKAECPCGIYNFNPYVGVVPEGERDPLGPDGLTLLTSGLKVACEARPSLPATPPQTAVVTATG…
g6671	GH18(27-390)	N	GH18	CS pos: 18-19. SLA-GA. Pr: 0.5714	MFLSSLCFLLLLLRLSLAGAPKVASAWYAGWHATAFPPSSISWSKYTQLTYAFAITTSDASMISIDESDKLIIPQFVAAAHENNVKASISIGGWTGSRFYSTHVGSSSNRSAFVDVVLDLVAEYSLDGVDFDWEYPNRQGLGCNTISVNDTANFLSFLQELRGRPAGQDLILSAATGLKPFNDSSSKPMEDVTAFAQVLDYIAIMNYDVWSPLSIAVGPNAPLNDTCAPSQYRTGSAVSSVDAWAKAGMPKDQIVLGVGSYGHSFSIDADSALDNGKIAAYPSSNPRTLGKGDRWDGDGGIDVCGVEQGPSGVYTYWGLIEEGFVHPNGTALDGIGYRYDTCSQTPYVYDEAKQVIVSFDNPESFSAKGKFITDNGLAGFAMWEAAGDSQDILLDSILS…
g6757	GH128(133-347)	N	N	CS pos: 28-29. VSA-LS. Pr: 0.3144	MPSKFLNLLAAASLAVISCTYGPESVSALSPDSHGDLLARRGAHHGLMAKKRTNDRRASCRKRPASSSDSVKVVASLTSAAASTESSVAAAAVALVPTVSETYTGGSGYTGGGGKGCLAWPNGDTGNLATWKTNHVSCLYTWSSWPVLGATAAGFEVLPQLWGDKDIGDFVSNIGKYTTPTWVLGFNEPNEVGQSNMSPDHAVELWWKYMEPLRAQGHKLVSPAVSSSPAGFDWMVDFFAKCQGCHIDMVATHYYDVTVQGFIDYQTKYHDQFNLPILVTEFACQNFNGGAQCSPGDILNFLDKTTAWMDSTDWILKYMYFGTMHDLFNVNYDNLMMASDGSPNALAPSFTREFTPNLFIVQPDASTSLLRDIPQPTSPFRVVPRPRPQLRSQKLSRKA…
g6758	GH128(171-384)	N	N	CS pos: 28-29. ANA-LS. Pr: 0.4211	MANKFLNLLATASLAIVACSFGAQPANALSTNHHDIGARHHVRAQDITPARKARRGLRRRQDTALCRVREATSSSVAASTTEAPVATPAVEDVGKAIPSAVVPAADVAVPNNSGSGSGSSSGGSNSGSSGGGGNHYTGGSGGNPCGQKAGLAWNMGDKDALSTWSAGGGRCLYNWSSWPMEKASSAGFVVAPMLWGGDKVAEFEANMPKYTSPTLVLHVNEPNESGQSNMSPEYAVQLWRDHMEPQKQRGHTLCSPAVSSALNGFTWMESFMSQCTDCSIDCVATHWYGTNADEFIAYQQKFLDRFGLPLVVTEFACHDFSGGPECDYNQARSFLRKTTAWLEGESRVWAYMAFGALDDMVGVSAADQLLDTSNYQPNALGWSYLQVGY
g6795	GT69(173-435)	N	N		MRLSWALQTGYSALRQFSPFALPAVLFGIIYNQVYIYWFATIGHGSWAPAWPANRTRLVFLMVALPTWGMIMASWTIVYAIICSIWAQRQRGIADYEAINLDPPEETRIHSRNPRRGYGQYRWHVTLVAYLSLALAGVFMLSTYEQPNDVRYRPDIQAALKSARPEGHGNGEKIFIGAMFYNNQQIIPYWSEEMTKIIKYLGTDNVFVSIVESNSGDRTPDLLAEFEKKLTTLNVKNRIILHDTSITRPPSMDTATPRIQFLADVRNKVMEPLVQHGGYDRAIFSNDIFIEAESILELLKTKGGNYDMACGIDLSYWGMYDAWVVRDRLGRLVSSLWPYILEDAGMQAIMADEPAPVFSCWNGIIAFRPDPFLPVHLRHSNRLSTKPLASPLPTSHPSY…
g6796	AA2(98-347)	N	N		MSFSAFSRTRAALRAGAPIASRAKTTAFRSTFRRYSTEPPAPKSNTGLYIGIAALVGGGATYLLYDSNFAKSGAQSVKVKANLTPTQEDYQKVYDRIADVIDSASDAGYDDGSYGPVLLRLAWHSSGTYDAESKTGGSNYATMRFEPEALHGANAGLNVARDLMEKVKQEFPWITYGDLWTLAGVAAVQEMGGPKIPWRPGRIDGVASQATPDGRLPDASQGADHLRSIFYRMGFNDQEIVALSGAHALGRCHTDRSGFEGPWTFSPTTLTNDYYKLLFDEKWVWRKWGGPKQLEDKKTKSLMMLPTDYVLTTDKSFKKYAKAYADDQDLFFKDFSAVVARLFELGVPASQFVTPEPWIMKSSSD
g6805	GH128(67-231)	N	N		MATLIASADAYPHANQPIRREVSSTHKAGLAWGGGDAEAMEQFTSTGKVQWYYTWSPKSYLLDAPVEPQEKGQSHMTPKEGAAMWKEYINPLLNDHPDLKLGSPAPSGAPSGKTWLLEFLDECDGCTVDFIACHWYDINATQFIEYMEDFHETFKRPIAVTEWSCQNFNNDDQCTEDEVVEFLNTTQTWMDNTEWIKMYAYFGSLRDMVGVNEENRLMESDGELTALGKQYIGAAEPGSGSDEGGDDNGARQMFNSANRRWLFSVLVCIQLASMLAV
g6848	AA4(92-336)	N	N		MYSARVLRLPNRVSTSRLPLFACPAASLPLHYRLSSTSSNASENKSRSESPNYLSYGLVAGASATVGYLLSTQLGTESTPKSAYGTFGSPKDYERAIVELQTTFAGHKDVISTDENDLSIHGYSSHDYHHPELPHSVVAYPESTEDVVKIVKIATKYRMPITPYSGATSLEGHTRGHTSGGVCVDISGMNKIIQINEADSDLVCQPGIGWIEVNDILKEKGIPLFFPLDPAPGASIGGMLSTGCSGTNAVRYGTAKGEWFLNATVVLPSGEVIKTRRRSRKSSAGFDLTKLFIGAEGTLGIVTEVTIRLAPVLPTNVAVVQFPNVRNASEAVVDILNQGVGIQCIELVDDIFMQATNIYGQSTKRWPEKDSLFIKLQGPSPSSLAESAKIVKEVAERHG…
g6856	CE16(633-773)	CE16	N		MDATTSTAANGKFSLENILGNDHENIVHSAEGWDEETTEKPPAEGYCIECEDQPAQVYCENCSDIYCEVCYASQHRKGSRKAHAVKSIESTLTAAPASPTKAMDVDLDAGADSDDDEDWERVTTASVPVVLAARPTPGEKFGEWFVERSKFIPLRLTLAERKYLRLLEAALLVSEYTDKIDTLSYGQNKAKRIVHQIRELCAIMSGLVLSADYKQGQELFQDRDFAANDDFYQTIFELGRRHKIMNPDKMRTTYGKLIYILQDSQTPEVKDLLSFSCVKPIRTVYTVLEDADALDLLRDDLVPVATKEIYSDGRPRRDVQRDIKSKERAIETLASRYERKGLSGENVRQCLYSIGDNHAFLRANRDPCERMIEYLKEHFHPTQAKDSKTSLAIRSGKGG…
g6869	PL9_3(23-386)	PL9	PL9_3	CS pos: 24-25. VLA-AT. Pr: 0.8079	MTRTLVIAALFGGLSLLSSVQVLAATFYVSPSGSSSGTGTISAPFNSIQAGIDAATAGSTIYLRGGTYSPTTNIQIKKSGAAGLSYVLSAYSGEKVVIDGEALPYTPGALDSSIPNGDRGILHIEKANFWEFYNLELKNGPYGIYHRDSSNNYYKNIITRDNYETGFQLQGASSNNTVLYLDSYGNRDPRKNGESADGFACKEGSGTGNTLNGARLWNNVDDGLDLWEFKSAVTIINTIAWGNGFNRWGFTPFEGDGNGFKLGGGDAADIGAANHVITNSIAFLNAASGFTDNSQPGNFKLSRNTAWNNGKDGFKMATAVSTLNGNIGALNKAQQASLSSQQVSSGNSWDSSGTWSNSSFKSVDTTAVTGDRGSDGKIGASSFLLPTSGASIGATTTW
g6886	AA3_2(47-531)	N	N	CS pos: 23-24. VSA-QG. Pr: 0.9542	MANQLLPFVLFAISSLFHSYVSAQGPGPCSQLPFPPSQGDIDNFLGTMFDYIVIGGGTAGVTLATRLAEDGTHTVGVIEAGLHHREDDLVDIPQIWGQAWNREEYDWSFQMVPQRHAANRSVSMPRGRMLGGSSGINGMAWNRATEEEYNSWEIFGPENGWNWDGLLPFMIKSENMSRVTPDPFPGLTDEQRNLTSLVYGFNGPMEVSHQIWYTDPMVPYVQALNSIGIDTVAEPQAGNPFGVYNTWSAIRRPNSTRTYSAKQYYCNGVAGDNLHILVGATGHHLHFGSSDESGNLVASGVEFSVGSTTYAVNATKEIILSSGPIKSPQLLELSGVGDPAVLSQFNIETVVELPGVGANLQKHVWSGVQWELKDGITTFDILRNNQTFAEQAMAEYRAN…
g6905	GH37(138-706)	GH37	GH37		MAAPSHTQGQGPTVTYVGSLYFAVAIDLAVFQSHIHHYKPKKAPAFEEDWHLRPRRMSHDEKNVSGPRRFLIDVEETIRIVLEQEDTDGDFQISVTDAGPKMMSLGTATSNGFKTFDIRGTYMLSNLLQELALARDHNRKRIVLDERRLTENPVDRLSRMIKHSFWHSLTRRIDGDGLEIITADPKNRTGKIQPRIYVPYGETRMAEYYRQVAKDKPHMNLDVQVLPKKPDDPVFVKSLNNKPGLLALAMNEVDDGKGGKTLKGIPFVVPGARFNELYNWDSYFISLGLLVDGQISMAQGMVEHFIFEITHYGKILNGSRSYYLCRTQPPFLTDMALQIYNQLDQSDVEANRDWLKRAIQAAIKEYHTIWVAQPRIDPKTGLSRFRPDGLGIPPETEAS…
g6941	GH5_9(216-520)	GH5	GH5_9		MSSSELDPPRASYLGTDSGTTPATSTTFLPKAEQDSYDGEQPTKKNWKKRPLVWIIALAALVVVVLAVILPVYFTVIKDKDSSSSSSSTSGGNGGGNGNGSGGNNDPDTDTNAAITGGDGSTITLSDGSTFVYENKFGGYWVSDPNDPFNDGAKPNSWTPALNETWTWGKDKAYGVNLGGWFVLEPFISPALFEKYPGAVDEWTLSELMPADELEEHYATFITEKDFAEIAGAGLNYIRLPIPFWAIDKLDEEPFLERTCWKYILQAFEWARKYGLRINLDLHTIPGSQNGYNHSGKLGQVNFLYGTMGLANAQRAINYIRIITEFISQPEYANLVGIFGFINEALLTQIGRPVLTSWYKEVHDTIREITGVGSGPYISVHDGFEGDMSQWDGFLAGSD…
g6972	GH71(227-474)	N	N		MSSMGNKIKGAVQTVHGVGENIRGTTLGAVDTMTHESDNKNDRIAESGRSEVRKGMANMQYGGGNTTAARTHGGIHSTQTEQQMPAGRTMQHEGYEAQPIGAGAGAPAGSGQAYGSVPAPEVHNDYPGHHREDAMSNDPTAVQVGHQPQFQQQQGNPQPDLQFSQQPTGYDKPSRNVYEPEPRRASYYLTRPSQDHTTTTQHALVFLPPTLWAAFVIKPSTATLKDVFAHYMIGTMSAEAIVDVQQAKALNIDAFALNVQNTVDPWAVDSIRFIFDAAANNDFKLFFSFDMAARSEVSYFLDTFVRYSTSPAYYRHNNLPVISTFYGARLSFGSPTPNEGWQRQLKDALRARDIEVYFLPAFSDAPNGPYEFLLNLSDGVFSWDSAWPYEDEGNVNVSS…
g7057	GH5_12(28-585)	GH5	GH5_12		MPRVPSISPATGNPTTSSYIHTTDCNFVDNAGRTLLLRGVNLSGSAKAPVDKPSYVLDGFWDDAEEGGKSFVGRPLNLDDGSADVHLARLRGWGFNMLRYPVTWEAIEHEGPGIYDEEFMEYTVRVLRRCKDFGFKVYMDPHQDIWSRFSGGSGAPFWTLAACGIEPRNFTATQSAIVHAEYPAAHDPDPGSLPAMIWSTNYGRLASQTIFTLFFAGKDFAPKCIIDGKNIQDYLQEHYIEAMGRMADYIRDAGDLLEDCVIGWDSMNEPFEGLCGWEDLNVSPTAQGSTLRKGTHPTPAQSLRLGMGEPQTVENFTFGAFGPTRNGTVTIDPKGFKMWADANNEVDGVHPKWGWKRDKDWQLGTCIWAQHGVWDIGTGYVLVPDYFRYIPSTRIGGPD…
g7075	GH76(68-414)	N	N	CS pos: 30-31. GQA-QD. Pr: 0.6002	MQRLPYTIIPRTLSSLGIAVTILAALEGQAQDLSVPGTWREYSNKKSLDERIAISQRGIDRIVRELDRNTGEFSGIGFWQSGNVYTAMVHQDVYAKNQKNKDTVVAMLNKAYERHPHYDEFGYDHLFLPFNCGHGIYCFYNDDALWWAQSAMHAHNAYGDQGLLNHVVDTWNFVSQYVITAEHVAAKKHPLKNFTLFDKCEDTTVSSMEGGVFWRPGENDPGVNSVTTGLSAYLAETTKDTKYKDAAIRSAKWIQRLNLKNNIVLDSVNAHNCERSPESWKFTYNSGKFLEGLSVLQDVTGDASWGRLMVDIAAAAMKFTGWQGDNGVIKEGASPSQNNDGVGFKAVFIRGLTEVHERTKNTNSALQILIHSYVCVQYNALLELASTGNDEYSSAWLGP…
g7098	N	N	GH38		MSHPDAEIHPVATGRAADTVAQHQHAFPLIFYAGWVRIIINHQNLSYRPQFCPFVQRAWIILEEKGIPYQYQEVNPYKKEKRFLDINPRGLVPAVEYNGCTLYESLILCEFFEDTFPNTGPHILPTDSADRAYARIWIDHLTKQFLPTFMRVVQSQDKTKQDEALEDMYEALRTFAKQIKGPYFLGKQFSLVDAAIAPWIIRDHIIGTHRGYKRTTHTHFAYLHNLILTMSSNTFSSTAKLGEYFAKLPACKADGTNWIFFRDRFLFAIDAAGLSEHFENVGMMTEPKAPAVADPSKPTADETKATNEYLQKRRIWKSEQAVIKQGIASAISDSLFLKVKGETTAKGMWEKVKSEYEKKSKMVTVDLRRKLQDERCAEGGDVKAHLTKLQSLREDLIAM…
g7109	GH43_5(34-310)	GH43	GH43_5	CS pos: 21-22. VFA-YP. Pr: 0.8524	MFLQVQNLLLLAAALATFVFAYPNPGLVTGNTSVHDPTLCKDGSGTYFLFSTAPGIAIRTSKDRTAFSYKGEMFPGGSATWTDQYTLEKNGNLWAPECYWDGSQFWVYYSASSFGSQNSAIFLATSRTGNPGDWQNRGLVHSTKTGDAYNSIDPNLYIESGKWYLTLGSFWGGIQLTTLNPSTGLASGGVTPIATRSVNDRAVEASTIYKHGNFYYLFTSWDKCCSGTSSTYNIRVGRSSSVTGSYVDASGVPLLQGGGTLVLQSHDAIVGPGGQDILVDGDGTLLVYHYYNAAGFFLGINLLDFSSGWPVAY
g7158	GT57(38-393)	GT57	GT57		MNSTVDHTEDTAESERVSLWTSCKDLLGQSEWDVLVYSTALKVLLFPAYRSTDFEVHRNWLAITHSLPISQWYYDTTSEWTLDYPPFFAYFEKLLSVPAAWIDPAIVDLNNLNYNAWSVVAYQRSTVIVSELVLGAALLRLIRGAVDPRMQRIVSISLFLHPGFIIVDHIHFQYNGFMFGILLWSILMARDGKKLLSGILFAVLLNFKHIYMYLAPAYFIYLLRSFCFDSVGRVQVKNFLSLANSIIAVFVLSFAPFVLMGQIPQVLSRLFPFTRGLNHAYWAPNFWALVTASDRLLLRRIVAKQTGMQVNAAGVTSTSRGLVGDTVFAVIPNIKPIHTFTITLAFQSIILTKLWRNPSYKSFLTALVLCGYASYLFGWHVHEKAVLLVLVPLR
g7223	GT32(494-573)	GT32	GT32		MPPGRPPHNSLHSPVASTSNVEDKINDVTLERFNEIANQDVEMQAPLSELATFLVLDTNILLHHFNALVQFVTDAERYNAPVVVIVPGVVITELDGHKKNPELRWFASTSSSWLLKKARDHNKVRGQASAETTRKSGNWRVKTGDEVPHDRLNDYLILDCCLYFARLRRTILWSGDYNLCFEAQSENIETIENETGERREWSSRYLMRAIFGAGIDEGLFQGEHAHFNGKTRISDDGETTSVDSDDAMDVDHAPNHGLVMTRSDVRDDLHKQVLDHFTTLLQEIVNMAGGAEIKRFLASGEQPSRYAPEWQKNRKAVRDWSASECLQYLDGKKRCLVTSPRLDVFLRPAYSGGGARRGQDWSRADWNEAMRALRMIGRDWHDGVVSESVDTLEWLLLPG…
g7247	CE4(144-259)	CE4	N	CS pos: 17-18. ASA-AV. Pr: 0.5548	MFLQLFLALNVAAAASAAVLPSDGHHEHEHVTRQRVPGQWWHDDEHPVHSLFRRASDDGTDYPDVGSPEWQAAFPSGTPDPALMPQAWKDALSDAVAAGKIPAIPQSATASGTNPIYPPGFDPSGPAVCSSTYKCRADDDVWDAPDGQIAISFDDGPSFGTEKLIDFMDGEDIHATHFLIGTYIRNTPDLFTRIFESGGDLAVHTYNHPYMTGLSNEAVVAQLAWTMEIIRNSTGGRVPKYWRPPYGDCDNRVRAIASEVLGLTTVIWNQDTDDWSLSTGGTTQQAIAASMNRWLTGPKSPGLVILEHELNDDTAQAFMDAYPAMVSNNWEVLSLAQIESESVYQNSDGSGDEPVQFMDVLGVTTDDPESSTSSDAPSSTVSSPSSTASQTSATSGGGT…
g7258	AA1_1(1-251)	AA1	AA1_1		MFMAGTNWADGPAFVSQCPIAKGNSFLYDFTALDQAGTYWYHSHLSTQYCDGIRGPLIIYDPDDPHASLYDIDNDDTVITLADWYHVFARDQAAVPTADAILINGLGRWASDPTSELAVINVEFGVRYRFRLVSMSCDPNFLFSIQGHTLNVIEADGVSIVPRETDQIHIFAGQRYSFVLTADQDIANYWIRAIPNLPIPPTNPVENGINSAILRYVSADVAEPLDDSIDIRNPLDENALVPLENPGAPTGTIFPVNLQFNFTPSNFQFTVNGAPFIPPDVPVLLQLLSGAQTPDTLMPGGSIIRLPPNAVIELSMPDGGLAGGPHPFHLHGHVFDVIRGPGQPANTEPNLTNPPRRDTVSIGSAGDNVTVRFVTDNPGPWFLHCHIDWHLELGLAIVF…
g7331	N	N	GT47		MTKGVTVVLGSQWGDEGKGKLVDILAAEADICARSAGGNNAGHTIVVPMGPDKKPTTFAFHLLPSGLVNPRCVGLIGSGVVVHVPSFFAELDALEAQGLDCTNRLFVSDRAHLVFDFHQIVDGLKEVELGNSSIGTTKKGIGPAYSGKASRSGLRIHHLFDEDTFATKFRKLVEGRFKRYGNFEYDTEGEIERYKILAARLKPYVVDSIVYLHKSIASGKRILVEGANALMLDLDYGTYPFVTSSNTTVGGVCTGLGLPPKLIGYSIGVMKAYTTRVGGGPFPTEQLNDVGVHFQEVGREFGTTTGRRRRCGWLDLVVMTHSCLINGYDSINLTKLDILDQIPEIKVAVKYRVDGVELEGFPADLELLAKVEVEYVTLPGWMISIEKATTYDELPENCK…
g7337	GH32(55-247)	GH32	N	CS pos: 18-19. VAS-WM. Pr: 0.1699	MSRRLLLAASAISASVASWMDIASRQNLDASSCASSNGTDSGVSSYNEPNRPQVHFSPSVNFMNDPNGLFRHPGDGLWHLYYQYNPTDPVAGNQHWGHATTPDLWTWTNHPPAIAPENLGEGIFSGSAVVDVDNTSGLFNESVPPEDRVVAIYTLHAPEKQTQDIAYSTDGGYTFTKYENNPVIDLNNTQFRDPKVHWDSQTSLWVMTVTLSQAYEILFYSSPDLKTWTELSRFGLHGLLGYQYECP
g7340	AA1_2(37-327)	AA1	AA1_2	CS pos: 15-16. ALA-GV. Pr: 0.6214	MEALFALALVSPALAGVHEIWWNLTYVDNVNPDGLFDRRAIGVNGTWPPPPIEVSTNDSLLVHVSNSLEKPATLHHHGMFFNSSSWMDGAIGVTECGIPPGGNFDYVVPVDTSGQWGTYWVHAHSHGQYVDGLRAPVVLHPPKEVYDYDGEFTVILGDWYHDEHAVLLDQFISISNPGGAEPVPESGLVYFAKDGAYLGPKSGTSTTGSVGFNENSTLPFEAGKTYRLKVVNTSAFAMFFFWIDGHDMRIIEVDGTDIEESPVDLISLTVAQRYSVLVTARNDTNANWAIHANMDTDMFDTVPPALNPNVTSSITYSSSAETTDLGFVXXXXQRYGLEVLFDTMDDGTNHAMFNMVTFNTPIVPSVFSALTLGSNATVQEAYSPNSFVIEHMDVLDIVV…
g7360	AA9(804-1015)	AA9	N		MNVKPVVDIIRKSDPGRSIVEASVVPHIWVVASFLYGIGDLTDLRDNIHPTLRAYVVKKFFLRAFLFVTTLAGYCGLCYDGLYTFILALSSVIVTVPGIILEDVMDFNLSWGQRELLLSECNESYGSAHGLSYYPSLRANSTIDTPELASRWCYSQWRSDWALDALWVILSIVPLSFFVFLSMRYLREIWLSTRDPKPEPRPYFKKIDDLHKRLGIPDLTPVFGKQLYIANMVVLCKVLANYRNLAEVLDHPILSKHVDSMTYINILILVVGIWCNLLGLLLGPAFWVIHSFLFILVIIPGVAYTSISEMSLTWNNKELLLAVCADSQGKPSGMTYAMGFFGAQVVWVENYDSEAGLMWCDGEWRYTWTVSMVAGVVCGVFMLVAFLRHGIYLSRRIIR…
g7398	GH9(11-423)	GH9	GH9		MFEKSIRTAYTMKGGYYDAGDYIKATFPLSFTIMSICWGATDFGQGYDLANQTAYLDSALRWGLDWMIKAHNSDNSLYVLVADPQDDNDYWGGDQDIPTPRPSFQVNATSPGTDVVAGVSAAFSACSNLYANRTFGELYSSPASLRDTSYAATLLSHAEALYSLAVNASGGQTEYQTSVPEVASSYASSSYEDELTIAALFLARAKNSSELFSQAESYYDDFDLGGQDAVFNWDSKTPGLSVLFSQLSHPDAGLDIGGDFSQWQDEAEAYFDKVVASEGRAQRTPGGLLIYDGDSDSASLNPALNAAMLLSRYAPMASSDDKRNSYLEFAQGQLDYALGDNPMSVPYVVGSNPNSPSNPHSAPASGGNDIGNIDTSPPEEAYVLYGAVIGGPDFEDNYY…
g7405	CE4(134-248)	N	CE4	CS pos: 18-19. VYA-HA. Pr: 0.6940	MLRSLPLFPLALASLVYAHAPTHVPGLGTWYHERDHPVHKLFPRAPTDGSQYDEVGSEAWTAAFPSGKPDVDAMPQEWRDALQSAIEAGKIPDIPTSDASTGFPTYDDDVDPASPEVCSATYKCRVDGDIWDAPDNVLGVGFDDGPWLGTQDLTDFLEENNERATHYLIGLNIRSRPQEFLRILDQGGDIAVHTYTHPYMTSLTNLEVVAEFGWTMEIIRRSAGGRIPKYWRPPTGDMDHRVRSIAREIFGLEVIMWNHDTFDWRMSQGGTTPQIINASLTEWITGPKSPGLIILQHELSPQTVKAFVDAYPLMKSSGWETKSQALLFSESAWQNSDSTEDNSTVTATSVLLPFVPPTGTPITSEDEEEDETDNVSTSGGSSGSGAGSGTTSASGSGST…
g7406	AA1_1(37-355)	AA1	AA1_1	CS pos: 23-24. VAA-DD. Pr: 0.9005	MLGLRVSQAFALFLLSRVSWVAADDVNYTFDVANDVVAPDGFNRAGVIVNGIFPGTLIQANKDDVLHITTNNILTDPNMRRSLTIHWHGLFQMRTATEDGPAFVTQCPVAPGHSYTYDIPLNGQAGTYWYHSHLASQYVDGLRGALVVYDPEDPHLSLYDVDDASTVITLADWYHLPSVGLTEKYLEQTFREPVADSGLINGKGRFEGGPKVQWARINVVAGKRYRFRCINISGYGEFEFSIEGHDMTIIEVDGVSHEPLRVDSFEIYAGQRYSFVLNANQRVDNYWISAPMEMHHDSDNDNLDGDNVFAVLHYEGAPDTDPKGDARKAFKKGDELEEHLLVPLFNPEAPGGATADHIIDLKFTEDKNDTTGHRIWTVNDFAYASPDLPTLLNIIANNA…
g7410	GT2_Glycos_transf_2(18-196)	GT2	GT2		MNPYASTMSAAMSSRKYSVILPTYNERKNLPIIIYLLVQTFTSNALPYEIIIVDDNSPDGTQEVAHQLARVYGEDHILLRPRAGKLGLGTAYIHGLNFVTGDFVIIMDADFSHHPKFIPRFIELQQKYDLDIVTGTRYRNGSKPGGVDTKGGVHGWDLKRKLVSRGANFLADTVLNPGVSDLTGSFRLYRLPVLRHIISVTVSKGYVFQMEMMVRARAAGYTVGEVPITFVDRIFGESKLGADEIVGYAKGVWALFVGAGAEYQVAHLIARSGTC
g7434	GT1(174-504)	GT1	GT1		MAQQTESDSNVDQDPPPYINYNSFTNQGKGLASSAFLTEDGRISISFDLKQKLPDLPQEYARDIDEFAVDTVEWRNVPKLSIVILIVGSRGDVQPYLALGKRLLKDGHRIRLASHETFRSFVNDAGLEFFDIGGNPQDLMSYMVKNPGLMPGMESLTNGDISRKREMLKEMISGCWMACHAPCPKTGQSFAADAIISNPPAFAHVHCAEALGVPLQMSFTMPWSPTTSFPHPLVNINASNAEEGLTNYLTYPLAEIITWQGIGDIINKFRQKSLGLQPLSLRSGPGLVETMKVPWTYCMSPTLVPKPRDWKNHIVADVVGFYFLDLATNYTPADDLAAFLARGSAPLYIGFGSVVVDDPVSMSKTIFEATKKAGVRALVSAGWGGLGGVSVPDHIFILG…
g7435	PL14(180-350)	PL14	N	CS pos: 19-20. TIA-LP. Pr: 0.4654	MVLMTILALCASLSTFTIALPLIVFDSLPGNAQMTAIASTTVTQDLPTSSIVFFIPPIVPTTLPTTSPSIYTEVITKTIETPIIEITQIEETYVTTTQLVTTDATVTNVVTVYLPSPSEPPSSSPAAWSSPAHMTDLLAFNTSAKGLPRNLELVNEIPASASPTTFVINAAPTITPVENDSSLLQVFYPANSINPGNKDRPYGGTQFYAEPLDITQAQNVTMTFRVFFPVDFDFVRGGKLPGLYGGHTGCSGGNAAWDCFSTRLMWRKDGYAPKDKQTTSLCRDPGSVCDTAYGFSIGRGSFNYSRGAWTTLSQTVVLNTPGKQNGVFTLDVNEERIISRDDVYYRDQMSKVADPVKPSKNQGILGGLLGGILRRFNGGQWSVALDVAPSFSVAEEDDA…
g7486	AA2(76-332)	AA2	N	CS pos: 21-22. SST-VA. Pr: 0.4526	MAPLTFLLTLFTFLSLRPSSTVAILPRATCDDGTTVSDTSCCVWYKLYGDLKEHLFSNVCGASFSSTYRDVLNYPQDEVASDAIRIAFHDAIGFSPALTAQGQWGGGGAGKNRSLIQTSNNSQQITDGSIMTFAFPELSYPGNKGVIQIANMLRPFADLRGVSIQFGAAVALTLCPGAPQLEFYAGRPAAVAASPDLLPGATESVDALLARFGDVGFSPDELVDLLASHSLAFQEHTDEAIPFTPLDSTPNVMDAQFHVEVLLNGTEYAGNNGQQPGEAKTPLKGEFRIQSDEALARDPRTACRWQSFIKDPRKIAPRFKKAMEKMSLVGQDHHLLTDCSGAIAAPVQFTVPDAHLPAGKTLYDVDASCPDDDFPSITADPGPSTAIPTFTHIEEDFAA…
g7534	GH28(70-393)	N	GH28	CS pos: 19-20. VWP-AE. Pr: 0.4642	MHALLCTGIVFAFIASVWPAECTVEHNEDGSDDSSFILKAFEECKEDSTITFQQANYSAYTPMSFTDLKNVTVRLEGNLLLPNNMTAVQIAINETKNQPSTYATPWFYFSGSDVQLIGSHSAEWGQFHGFGRQWWDIGNRILRPQLGTFNVTNGLLRGLKVIKPVAWGWNLPGKNLRVENHFVDAQPNNGTRDSTVSFPFNTDGINVSGQNITIDGYYGHNGDDCVSVIHGAKDVLAQNGFCGFSSHGLSIGFLGRNGFHSAVDNVLFRNWTMQGAVYGARFKSWTGGRGHANNITWEDIVVQGVSTPIFITQNYYDQDKGPQPENTNKSSTEISNITFRNFTGTLATNWSITGNEAIIFDLYPGTALNITVTDLNIRLAEGRADVDEPTVICDPASLA…
g7537	GT90(316-544)	N	GT90		MGRLWTLFSAVVLLCVVYTLFSNYTLQLACPPQVQVVREPAQPTLISLPLVLEEHKYHAHGLLETVAAGRHPVYDLIARAEKEWEAKQRSASRTLQEAVTEYRRRYGRQPPKGFDKWWEYVQRHDVQLPDEYDQIYRDLEPYWGMDPTDLRELYTRLENEKSNFMILTKEDGGNLDLVNLLSNPDRQEGPAWSAIELLENVQEHLPPFRAIFTHDDRPNRLTDFNMKESLLDAAKTQSVLRKKDLVIPHYRRWRSACDPDSRASTITFDLDAPAPSKPLKSFIHDHRLAMDPCLHPELWWTHGQFVSHETGPGAQPAMIPEFAYCSTTLHHDIRVPSLYGWVDGVSSSEDPVWDDKIEERMVWRGLNTGITYSESSRWNMSHRTTLLAKTSAIAGNVDV…
g7557	GH131(20-249)	GH131	GH131	CS pos: 16-17. VRA-GT. Pr: 0.6370	MFSSLLVFLSVGLVRAGTTVWSGSFDNYATVADFDKWSWANQVGQYQWYIHGEGPSSDYLALDSSFKNPASEEKHGLKMTISSNATWNSQMERAELIPQTTANLGTGTLFYHFSVKRSNTNAPDSTLEHQVMFFESHFTELKYGVGPTATDLQWHVGGNRQWGTPFTADTWFNFAYEINFGSSTVGLWASTGSAPLTKVVQNLSASTSTNSADFHVGVLRIVNRNPPEDWYVSGVYIESGPITTSIGTGTGTGPVGTTSVATSAAPSTTGPTSTSVAAGPLQTQWGQCGGEIFCKFWLEEKRLKFVQGNGWTGATACAGSFKCVKLSDYYFQCQ
g7562	PL3_2(411-605)	PL3	N		MDEERLRRFASQIRKTAGGAGGRPPAGAVAGGSLLLAVIGGGVLLASSLVNVDGGHRAVKYSRLSGVSQEVYPEGTHIMVGTTVPFNKSSTQPVADPLARETNYVQSIPHALPPLLTFYQLDLQMVNITCRVLSRPSIPDLPKIYQQLGTDYDERVLPSIVNEVLKSVVAQFNASQLITQRENVSRLVRERLTQRAKSFNLILEDVSITHATFSPEFTHAVEAKQIAQQNAFRAVFLVDKAIQEKESIIVRAQGEAKSAELIGESMRAHKGFLELRRLDAARSIAELLATSGNRVMLDSQSLLLNVNSLPLRIFSRRYDLDFDVARLTYRSDAFGSTWFVPASNLAGRKTVYMWRAPLGHSADAQCRNLKDITPTPLLLAEMRLIVTAAILLVHSLGAY…
g7567	CE16(41-313)	N	N	CS pos: 22-23. VAG-SP. Pr: 0.7388	MHWLPLAGPLLIVIVAATLVAGSPKSKPHKFVWDSIKHVYAFGDSYTFVEGELGRVNYSFIGDAFRYSFTPEELLSNKIITNKTSSEGANWVEFLTGCYGGLPSDCDVELWNFAFAGANISPDLLPLHHNYTVDLDGQVKQWLTYASDVIPHPSKETLTVWWIGINDTGDTINNSTITDWTAFWENEMGAYFEAVQSTVDHGLKQHLFMNVPPGDRSPNSNTNATRVEIHKQRVSEFNTALRHAIKRFARRNTDATVLTFDAHSWFTDILDHPAKHGFSNVTGYCKCAEPTGYVWYDAGHPTAQVHELLARAVDKHLERATPVC
g7613	CE3(85-272)	CE3	N	CS pos: 19-20. AFA-QQ. Pr: 0.9436	MVQLYSLVALSFAFLPAFAQQPLYGQCGGTGWNGQTTCVSGAICTKLNDWYSQCLPGTAPVTTTAVPSATTGAPPTSTGATGLDIRLLPLGDSITFGLSSGGGNGYRSTLHTLLEPGNTVDFIGSVKAGTMSDNDNEGHSGATIDQIASFARAAEALPARPNIVLLMAGTNDVFGGAISSAPNRLSSLIDQIFTAAPDTALIVATLTPLSSGQSSVNIYNQAITSLVNTRNAAGQHILLADMGTVQSSDLADGVHPNDSGYNKMANAWFSAIQKAEANGWIGQPITLA
g7614	CE3(888-987)	N	N		MSVVVALLLLTSMDNDPSLLKAKNFQDAFEGSTIRIIQNIETKRKELEGSDWHESDLRDPQLIAGEVAAQIAFFRKLKFQYLEQSAKDKYIKNIVTNTDDAPFVTSEDNRALQSQNEKRKAKLKEAKSQLVDVQSKMRELGPRIEHDYTQVKQASSEAASLSQKIIDTRLALSRLRQAHPHPRLTENAATAKLAEQDDQLQELADALATAQDEARQLKDGVKKGSADAERLRMERTEIEKRIKTELDDTRWLPLCDWLTQAISIHRSLFNLQSVENLADNELELVYKLSVGSKMRLVSIKLIFLPGTRQLATVEVSGLEGVDVDVMELIDAHVPSNDAPGVVAAILARHRQFPFSSASLQPPPSLSRRGMAPPHYEPKDDDKDHYEERRGLLTGEQDKE…
g7617	CE4(122-238)	N	CE4	CS pos: 17-18. VAA-ND. Pr: 0.4530	MFVVASLALLSTVVVAANDRTTESGEAAISDLNEECTPYYYAPTADRIASFPQVWHPATIMDGDTVARDKWNSISASGTSTGDFSNVTYTPADPDCWWTYHQCTTPKLEGIPADTVNVPEPNTLGYGFDDGPNCTHNAFYNYLTEQNQRATMFYVGSNVLDWPLEAQRAVTDGHEVCAHTWSHRYMTSLSSEDAFAELYYTLQAIKLATGVTPSCWRPPFGDIDDRIRAIAHALGLQTIVWKYDSNDWKVGLQGVTQDTVSGNYQALIDRVKNGTFATEGAVILTHELNNYTMQTAMDWYPKLKEAFQYIVPMAVAMNKTQPYAEANYSMPTFEEYIGGETQMPTPEVTSSDNSTSQAHHHESTDQATDSCPSLQPQWTWAAVLALAGMLLINL
g7620	GH15(102-442)+CBM20(478-563)	GH15	GH15	CS pos: 18-19. AWA-QS. Pr: 0.7285	MRPISLLYGLGLTVSAWAQSGSIEAYIASESPIAKAGVLANIGPNGSKSQGAKVYSRFRGVREVALVILHGSSFDTSFGFTLGRDTTLRPHIDNYVTSQIQQQQVSNPSGTVSTGGLGEPKFHIDLSAFTGGWGRPQRDGPALRATAIIAYANWLIEQGNTTFVTNTIWPVLELDLNYVVANWNFTGFDLWEEVSSASFFTTAAQHRSLREGATLATALGKTSLATTYTTQAVNTLCFLQSYWNPSGGYVTANTGGGRSGKDANVALASLHTFDPAAGCDAVTFQPCSDKALSNLKVYVDAFRSIYPINSGIASSAAVATGRYPEDTYYNGNPWYLTTAAVAEQLYDAIIVWKAQGSIQVTSTSLAFFQQLVPAVTAGTYASSSSTYTTLLNAVQTYAD…
g7625	CE4(134-249)	CE4	N	CS pos: 19-20. AHA-PS. Pr: 0.4078	MLRSLSLALTFATLSFAHAPSYLSGRGTWYHARDHPVHKLFPRLSTDGAEYPEVGSAAWSASYPASALDSERLPQAWKDALDAAVADGRIPNLSPSTIDEEGFTVYPDHLDPAGPEVCSSTFKCMTGEGVVWDAPDGFIGIGFDDGPELGTGKLVNYLTEQQQTATHFLIGSKILGNPEGFLAIMAQGGDLAVHTWTHPYMTSLSNEEVVAELGWTMEIIRQSSGGRIPKYWRPPYGDSDNRVNAIAKEVLGMEPIIWNQDTDDWAMSTGKQTMDGIATSMNTWLTGYKSPGLVILHHESTESTVQAFINSFPLMSANGWQTKSMALLVSDSAYQNSDGTGEGSTVTPASIVQLSQFVSNPQPPAQEAGEVEDIASPSAVLHAVADVTSTFTPHTRPSQ…
g7645	N	N	GT2		MNSLDYNKVYVPMVGSCASDPNGCPVTWTDFVNYFYNTVQATLAMDWPTSGDAVLAWWAEIATWTGFCSGTNCVNGQIPYTNLDDWLRYSSEVLITTPGSPPIRDPLSPIRDENEDDWDPVTNGPCPYADSSLCGYDDGPQEPPESDSTSFTATSAGPKPKFATLSLTRGDTSSSLVSSSIADDFLPRNVPPAVYITNGTERVAVDLNLEGGSPPERRSFSIVERVIESINATLLQHRAPTPSKDTCKGDTDVPSPLPILTYYCDYLPDICANIRSSGLLTNDQMVLTYDSFGTGKRRNGICNDAYRATLRPNGCDKTQHDPAYWKVSCDEFPFNQALEGGKANGAVRAGVPTQEQNYQSGLQSAIAALYRIKGDNRSIWSRPRNVKRRYPGMCHEYII…
g7679	GH13_1(55-373)	N	GH13_1	CS pos: 17-18. VFA-AS. Pr: 0.5553	MPRFVATFLLLATTVFAASVADWRSKSIYQVVTDRFATTDDKGGPCDTDARKYCGGTWHGIINHLDYIQAMGFDAVWISPVVENLENETAYGEAYQGFWTKDMNTLNPHFGTPDDLKALSAALHHRDMYLMVDVLVNHYAAVPVLNTSRPSNASEKNDVLSLAPETFAPMSKSAFHPQCFITDYDNQTQVEECWLGDPKLLMLDIDTENGTNFRMLNSWITDLVTEYEIDGLRIAAAKHIRQDFWKDFKTAAGVFSLGEVLSDNVTYTSGYTQALDGVLDYPTWFTLAEVFSSPTGNFSNLINVVIQSQRSYSTGLVTSGSFVENASQPRFGNLTNDESLIKNAITWPFLHDGIPIVYYGQEQGFSGGSSPHNHEALWTSEYRTYRKPLVKQISALNVA…
g7697	GH47(90-543)	GH47	GH47		MCDRDHERVLCFRHDNYYARQWNLELSTSYTRHACQSSTPFIAQLAQFQDSIQSQLPSKWKEGDYAFSSVLEVSSTPSSDDRKRDAVVEAFKHAWRAYERDAMGSDEYHPISHTGSNISKSGGFGYTVVDVLDTMYIMGLQDDYNKARHWIKNSLSFDREGVFSTFETTIRVLGGLLAAYHLTVDKMYLDKATDLGDRLLTAFDTKTGLPLPSVNFAQRKGVPESYATDRLSTAEAATLQLEFRYLAELTGRKDYWFKAEAVMQHIHNALKASPENSNLVPIYMSVDNAKFMQSDIRLGSRGDSYYEYLLKQYLQTNNEEPIYRKMYEESMQGLHDRLVHKSHRQKLTYIAELIPAARHKEEAFELSPKQDHLVCFLAGSLMLGATTTGAKSTPVSIPP…
g7733	N	CBM1	N		TFLVLATSTASSDISLTSDFRLTSVILEYCGAANRVAVYSGKGPVDVPAPTVQPTSPVTTAPLPGQTSAVVPKYGQCGGQNWTGGTTCEAGSTCQFSNQWYSQCL
g7742	N	CBM1	N		NVPCAGNLNEYCGAANRVAVYSGKGPVDVPAPQPTSPVTTAPLPGQTSAVVPKYGQCGGQNWTGGTTCEAGSTCKFSNQWYSQCL
g7761	GH105(334-679)	N	N	CS pos: 20-21. VGA-LP. Pr: 0.7722	MYPHPIIITFLVATILSVGALPTRMPTRVQLNSTLRKKDGKKEDEQKEKDENCYCFNMPVIDIIENLTITGSTEKIEGNIRCLHAAKPVDYCKDKDGKTIPGQGLCCDKCTRFGCDKDPVGVPIGYSVQELVKLQLGTDLGIGTDEDKKNGEEESKPEGEDEKTKEDENKGEEKKKTGDEKKTGDDDESEPKEEKENGTKKEDEEGEKTEKEETKTKGNAKTDDGDDEGDDEEGEEDNEGETKKKKKKKTKEDDDEDKEKDDGEGQKNDEGETKEKPTKKESKDNEXTGRARGSGGQLGLVRASSYSFWMVESIMARGQGILTTTGDVSELLQTGFTQKAFRRLVEQYPDDLLTVRVAQYIQKSVDSVVGSVSNSAQDTSYPLDRLSNGNNLIELYEQT…
g7802	GH7(20-452)	GH7	GH7	CS pos: 23-24. VGT-LT. Pr: 0.2798	MFNKVALLSFTFLAVVLGQQVGTLTAESHPSLTVSKCSAGGSCTTENKSIVLDSNWRWLHDAKGSTNCYTGNTFDKSLCGTPEACTTNCALEGADYAKTYGITTSGDALTLKFVTGSNVGSRVYLMDDESNYMMFNLKNQEFTFDVDVSKLPCGLNGALYFVEMEKDGGKAAYSTNKAGAKYGTGYCDSQCPHDIKFINGKANTLGWTGSPNDVNSGTGQYGSCCAEMDIWEANSISSAYTPHPCTVDGGAYMCEGTECGDGDNRYGGVCDKDGCDYNSYRQGDTSFYGPGKTIDTTKKITVVTQFITTDGTANGDLKEIRRVYVQNGKVVENSYSTYPALTDYNSITEEYCSAQKTLFGDTNSFGDRGGLAAMGDSYQNGMVLVLSLWDDHAVNMLWL…
g7848	N	N	GH115		MSIAVERNATRLWIVNVGDLKPYEREIEFFLNYGWDAPAWNPDNLDTFVSRWAQREFALNAEDALVVTEIVANLTRFNARKKPELLQPTTYSIIHYREAEGIIDSWDTLLNAATGVYEKLADDLKPAFFQLVLHPVAASANLGKMIIYAGMNTVRASQARLSTNELADQVEELFDVDYELEAQYHGLLDGKWNHMMDQTHIGYYNWQQPTMNSMPAVARVQGKKQALSGAIRLAPEGTLGAWPGDNSNQCQGSNCSPSVTLDPYDVFGSRYVDVGSGGPASFNFNVSTNVTWLSIKPTTGSISTEIPEQRVYASVTDWDALGAGTSYAAMTFTSLAEGQKRQWVTVSFIAKNTRSSLDADFTGFVESAGVVSIEAAHASRNLTVDDTYWKELPGIGRTL…
g7908	N	N	GH38		MSESTNSVYRIEPLRGAENFGVWKIKMLDILTDLSLDDYIDKNTSEPSDAAAKATWKKNDRKALSTIRLRVADNVLVYVSGAKTALEAWTSLSNMYEAKGPIGIVSARRKFFRAQCPEEGDIEEHIRTMRSYQDELATLGQTISESDFSTSLLTSLPDSWNGFISSIADDLIKDSSKVIARVLAEAARLRDRASASTALPAVDRSSANCFNCGKKGHFANECRSPRNQSDSRSNNQPPRRRRYPPSRRKSNKSSHANVAVSDDDDDDFAFISRDTSNQKLAPDDWLLDSGCSRSIARNRTDFTDYFETPGHKILGIGETAGIGRGTISLSFALGSATRSGTLKDVIHCPTAPFNLVSLARLTDAGYVAHFKDTIVEIRSQQGHLIAIGDKISHLYKLRI…
g7913	GH16(181-564)	GH16	GH16		MSDSLRPTSAGSDAGASSNRSSMALYDALPPPQSILPHISSSSSSVRSSDRDSKYPGAKVNDKMMPYVYAPVGMQYMDDDDDDILGLELGQTKTFPWRGVVNVSVLFLIIAALLFIFIFYPIIVYYRHAPRTEAVVNNVQVNMTGQVPEFIGMPSPVDKDTPHDARSRTGFDGEDYVLVFSDEFNTPDRTFYPGQDPYWEAADLWYGVTADQEWYDPSQITTRDGNLVITMDSVETLVAGQTPNSTAPFTAAQNHDLNYRSGMLQSWNKFCFTSGYIEVSVILPGPNADTQGYWPGVWTMGNLARPGFRATADGLWPYTYDTCDLGTFPNQTLKDGSGPPAALHSDNSRAKYNSELSWLSGQRLSACTCPSSDHPGPYLSSEGRYRGRGSPEIDVLEAE…
g7939	GH37(70-519)	GH37	GH37	CS pos: 16-17. VYG-QS. Pr: 0.7098	MLVPVLLLGVAGSVYGQSSSATVSTAVANPSASAGASLPSQAPLPPKQDWCPSEIFCAGELLQTVNLAALFPDDKTFIDKPTTKNASSVLADFASLSSAPTVGDVEDFVNSDFGGEGLELEPLNLAEEEGEGYEENPPFLGNVTDPLLRAWAGTVHGYWAQLVRGTKSQGGVLCDGVQCESSLIPLNHTFVVPGGRFREQYYWDSFWIVEGLLESRLFSIVNATLQNFMDEIETIGFIPNGGRIYYLNRSQPPLFIQMLARYVTVSGDNEILTRALPLAEKEMQWWRENRYVNVTSPTTNETYEVAHYDVTNSAPRPESYLTDYETANNEPALNESERADLYAELATGAESGWDFTSRWFTDPKPGNGDLRTLQVRSIVPVELNSILYKNHIVLSQLST…
g7949	CE10(56-337)	N	N		MVEDHLQVTQLPWSIYPMAVKLSGSVNREYGQLTVAEKARLLFWINILPLHVVYSLATTRSPKPWRRIASESIARFSMRRFPTFAPQYLLRSSLDVYERWTAARKLPRTIDALPNDVKLLWIGGGFVYPMSDFAHCFLRHVQFEIQQRLGKPIGMVSLSYNLIPTGRFPSQLRDAQSAVDFLLRSGVKPSNLQLLGESAGGTIILQLLRHIHHPHPAVAPLPRDTRVAGACVISPGVPFHEGDDESKEDIINLKALRRFSALLVHDVLESDLRYLRPGEGFLGDLEVRLMVTAGDKEVMKGGHQRLYEELVKCPGVALRWVVDEGGFHCGPVFDFPMLILEGRPYIGDATREVVRWLGDGFAVLVEP
g7971	GH88(63-384)	GH88	GH88	CS pos: 18-19. SFA-QS. Pr: 0.8765	MLLTPLIISLGLASTSFAQSPPAQLYSPLVPGKILSATNALPASIQYPQFTTTAGRWRLFAPDTWTSGFHPATLYALHQRTKLCGATKSNGLGAADWLALARSTSAALASLTKRNSVGHDVGFLSFPYVDELKLNPNNQTAARVVNEFATFLANRFSPTVGCTRSWDSSDPTNFQVIIDNMMNLEVLFVSAALTGNHTLIDIANSHATTTMNNHIRSDGSTWHVIEYDSTNGRVTKKRTAQGYSDSSTWTRGQAWGVYGFAMMYQRTQNPDYLKTSRRLAEFFLNNMPADGIVPWDFNAPVANRPADSSAATLMATGLLLLAQVEKDTANVGRWTSSAIRLLNAITALAWNEPWDSLLSNGTVSRPANNYLTGTTYGDYYYVVAGNELVSMGLATC
g7975	GH3(37-251)	GH3	GH3		MPPSDFANANIDEIVAQLTSDEAILLTAGVGFWHTHGIPRLGIPAIKVSDGPNGVRGNHFFMSTPAKCLPSSTGMGATWDTELIETVGLKLLAEEAKLRAASIILAPTCNIQRNPLGGRSFESFAEDPLLSGMIATAYVKGIQSGGIGTTIKHFTGNDKEDDRMGSDSIISDRALREIYLMPFMLAQKHAKPWSFMTAYNRVNGTHVSENPFFLKQILRDEWKFTGMTMSDWFGVYSVDLSIKAGLDLEMPGTNKWRTLDLMTRSIGSRKLTLRTIKERARAVLELVQRCAKECPEILDGDGEERTVDTDETRDLLRRVAAESIVLLKNDSNTLPLDPKKVKKVAIVGGNAKAIVVSGGGSAALKTSYFVTPYDGILNALGDVEVTYSEGARTFRSLPT…
g7982	AA9(7-223)	AA9	N	CS pos: 19-20. SHA-TF. Pr: 0.6622	MLLSFAITASFIASVASHATFQQLWIGDVDAGSSCVRKVPSNSPVTDVNSAAIACNAGAAATSGVCPVKAGGAVTVEMHQQPGDRSCRNEAIGGQHYGPVMVYMAKVSNATTADGASASWFKVAQSGLMSNSPDYFGVQTAEVLNDNCGHYTFRVPQDIAPGDYLIRAEVIALHSASGQGGAQFYPACYQVRVSGSGSANPPTVKFPGAYRSNDPGILVNIHTDLTTYVVPGPSPYGTTVAAVATTAYPTTATWNTALQPSTVPTVVPNVG
g7985	AA1_1(131-429)	AA1	AA1_1		MPPVWSRGSYCGQNFFVKGLADVEEGVHDVLEMLGHLQLDTVVFGDDDIHTAILDICPTATSWLDGLKTARCARLSRKHEAEESFSSSMGMSYRRLFSSKSSKPWRSDQDCACAYAAIGPWANMEIVNRHISPDGFERAAVLVNGTFPGPLVRGFKGNRFNLNVIDQLTDNTMLRSTSIASYLPSFVTQCPIAANNSFLYDFEVPDQAGTFWYHSHLSTQYCDGLRGPLVVYDLFDPHGHLYDIDTESTVITLADWYHIPALAAGAVPIFDSTLINGKGRYVGGPRTQLFELNVIRGLRYRLRLVAISCDPNWVFSIDGHNMTVIEADGINTMPLLVNSVQIFAGQRYSLILHANQPIRNYWIRADPNFGPTGFEGGINSGILHYVGAPLSQDPTSIQA…
g7987	AA1_1(36-344)	AA1	AA1_1	CS pos: 21-22. AYA-AI. Pr: 0.6663	MYPVSSTVSAVVFSLVACAYAAIGPASNMRIVNANISPDGFERAAVLAGGTFPGPLVRGNKGDRFKMNVIDQLTDNTMLRSTSIHWHGMFMAGSSWADGPSFVTQCPIAANHSFLYDFKVPDQAGTFWYHSHLSSQYCDGLRGPMVVYDPRDPHRKLYDVDDESTIITLADWYHTPAMAAGPVPIFDSTLINGKGRYIGGPATPFFKLNVIRGLRYRLRLIAISCDPNWVXXXXHNMTVIEADGENTKPLLVDSVQIFAGQRYSLILHANQPVRNYWMRANPNFGPTGFDGGINSGVLHYVGAPGNKDPESVQAPSSNPLLETSLRPLRDPQAPGGDGEADVTLRLELGFNLTTFLFTVNGVPFVPPTAPVLLQILSGATNAADLLPSGSVYELPANKV…
g8032	GH115(1-530)	N	GH115		MSIAVERNATRLWIVNVGDLKPYEREIEFFLNYGWDAPAWNPDNLDTFVSRWAQREFALNAEDALVVTEIVANLTRFNARKKPELLQPTTYSIVHYREAEGIIDSWDTLLTTATGVYEKLADDLKPAFFQLVLHPVAASANLGKMIIYAGMNTVRASQARLSTNELADRVEELFGIDYELESQYHGLLDGKWNHMMDQTHVGYFYWQQPMVNSMPYITRIQGNKQALSGAMRLAPEGTLAAWPGDNSNQCAQGYDCPAPSLTLDPYDVFGSRYVDVGSGGPASFNFNVSTNATWLSIEPTKGYISTENPEQRVYASVTDWTALEAGNSYATMTFTSQAEGQKSRSVIVTFIGKNTQGSLDADFTVRVLSLXXXXXXXXXXXXXXXXXXXXXXXXXXXXX…
g8063	N	N	GH18		MAGILQRLFYSHAPSLRVLFIMSQNSPPPSYRSAPSLYDSGFIGRLDERSPLVPVPVKKRQRDNQVGRLFLVILVIALLSAVAIAGSIHLYNDSNRLRDLKDMDDEHRQRIEDEDKEMEARKQKHIRDLKDMDDERRRRIEYEDKEIERRRAKQTHEIQWRLDELRRDAELRAAAKLYWGDLVHDETCSAWKERPFSAELINLPNGVDGVSWCLSTSIDIFGITYPAPTHCSQDKEGRVLGHWIVKNDPTCRTYWENHRDMGCHDGARLIEAKLANHQPGYGTWREMCLSTPSHFNYADQGTPQICFVAGNDGIHGSWFIQDEEXILFKGRLAVTRSGHVGLWAPLYQLPSTSSPRISSFTSFNRPIGFMSICGSSKGHSFGRRPIQRKVVVCGDGACG…
g8064	N	N	GH18		MSLLSLPSDPGYLSDSGELNGVEDLTQPRYPHTRAQLSSLARQYKPLDNVDSDLEIDDIPRVSSSFVKRVVAMLIDEREDDLQTLLRESFGMDHQTAEQSVLDLMHKHRDDIAGVPFLFLTPTRRPISRPSSRASTRLYPARPDTPNSAPSSPLSHVFRRPHTPLGSPLATGQASSYMSIGHATSDYSPSSSPVLSHTSTMFTQFTASLPASPLSSPRLLNAKASEFKPIPRPLSAASSHPGYMRDRTETPSPDMWAHSPFRATSNLAIAAPLLPEQSLLTRSLTPNSGLRSSIRPDERDSDEEDPFDPFTQKTPAFHSYNGLDFDAQWSNSSVSSISPEDARIDMSYQYHHNSYATYDSLLSDDLPLGQDPEVDAEASDALTDGMTPFDVLSSVFGSS…
g8083	GT2_Chitin_synth_2(1226-1732)	GT2	GT2		MNRQSTIHQRLEAVTDLSKLSPISDDIIVACLRERFMTDNVYTGIGTSGLVALNPHKYIASNSDSVLNKYAAAYRDTDQNKTPQPPHIFQLANNAYYHMRRTTQDQCIVFNGETSSGKSENRRLATKAILELSVSNPGKKGSKLGNQVPASEFVLESFGNARTLFNPNASRFGKYTELQFSDKGRICGVKTLDYYLERNRVSAVPSGERNFHIFYYLVAGASAEERQHLHLLDRAPYRYLGQRTIPARIDGSRDNDAIRFDQLKVALKTIGFSKRNVAQTCQLLAAILHLGNLEFTMDRHRNEDAAVVRNHDILNIVGDFLGIQPSDLESALSYKTKLVKKELCTVFLDPDGASDNRDDLAKTLYSLLFAWLNEHINQRLCKDDFSTFIGLFDLPGPQN…
g8084	GH3(840-1069)	GH3	N		MTSKRKAPDENPLLANKRTKHEKDKAMSKRKIPNGEEQPGGLVIVRAPSLSQDVRPPSRQQSIPVQPQSTNKVPRSGSQPPSASQPQPSSSKVSHSIPSSSQPIHSRGRDVSLSQADPSSTKDARSMDDESDHHRRQSRARAIPSALRANNWQEEPPPAKADTSRRGMSVDITEPLPTADSPVIERNKAMRQGYMVAINEEDTPRQTETPQSPKTPVNGHLRKSSQGSRGHRIRVSIESAGAITQPHNSVTESSFYKHIPADLPDADRMRLLLSWCTTRVMNTAPDKSLPKLSTKGTSILQAAQEKMLRLLSDKRVDTRTSAPQDDDTLPKLKNEQNESNRRFEVTYTAQIRAAEKEDEAWKNAIHSYDSYFRRREAQLEETLIPMSAKSRGKQKATAI…
g8086	GT2_Chitin_synth_1(275-415)	GT2	GT2		MSHYPPEADEAQQRNYNDGYSPYPQANTTPQAPYTHPYEQPYDQGYRDSYYSQQSTHPNPYSSPPPPLPPLGGYSSPPPVHDPYAQPYDPYGASPLPVHASPPQDYLNAPFHPLSPPPGGAPSVAPSIGPYGQSYELSDNPVPHGSDEGDTPLLNRQDAAQMAMPMPGGNANYGGFEDDGDDANFIRYGRIPQRVPRRYKTVKRVQLRQGHYVNEAEVPPKLLELCPNKTDREFTHTRYTAVTCDPNDFQSEGFGLRQLEYTPGRRTELFIVMTMYNEDEELFCRTMDGVMKNIAHLCSRTRSKTWGKDGWKKVVVCIVSDGRSKINSRTLSVIAAMGVYQEGIAKNALNNVPVIAHVFEYTTQVSVNPSLRIEGAEKGYVPVQIIFCLKEKNQKKINS…
g8098	GT39(118-356)	GT39	GT39		MPAVVLTFGASDPDSDFEHITQDQDQETLPLYHHHMEDTARHRRTKGSAEQHGDMDIELDEKLRLQYDDQGKDVYSKLRAPVRTGLGGGRVRQPPPPPPTSIREFLLQNLEHIPPVIYTLLSCYTRYHKIGRADVVVWDEAHFGKFGSHYLKREFYFDVHPPLGKMLVGLAGLLAGYDGKFEFKSGEKYPDAVPYVAMRVIMATFGVAMVPLGWYTAVELGMSQWACHLVALMVLFDVGWLCISRFILLDSMLLFFTFLTVFCLTKFHNQQWQPFSVDWWLWLTMTGLSIGWVTSVKMVGLFVTALVGLYTIEDLWDKFGDLRMSARDQAKHWGARILCLIIVPILTFMAAFKVHFMILNHSGPGDAQMSSLFQANLVGNDFKNNPLEIAYGSKVTLKS…
g8102	GT20(202-508)	GT20	GT20		MASPATPNMDFAQGGHLVVVSNRLPITINKDANGEYHFKMSSGGLVSALSGFKKSLNFTWIGWPGFFIPVKDRAHVDKRLMEEYSCQAVYLDDDVADRHYNGFSNSILWPLFHYHPGEMNFDEENWLAYRQANLAFAEAVKLQLKPGSMVWVQDYHLMLLPMLLRGLIDGTSTGSSTALAELSRITEGIEGEDITVSKPASIPGIKIGFFLHTPFPSSEIYRILPVRREILLGILYCDLIGFHTYDYARHFLSSCTRILGLPTMPNGVEFEGRLAHVGTFPIGIEPQSFIQNLEKESVKQRISQLEQRFGGVKVIVGVDRLDYIKGVPQKLHGLELFLTQHPEWIGKVVLVQLAVPSRQDVEEYQNLRSTVNELVGRINGRFGTVEFMPIHFMHKSLAF…
g8123	GH18(64-387)	N	N	CS pos: 18-19. ALA-AP. Pr: 0.6675	MHLALVSFFVLFSSLALAAPGQSFCALQASSTGSSSVPNPTSSTGPKSRIASACLTTPDTTVIEISNPTKLTEFVNAAHGNNVKALISIGGWTGSQYFSSAVATAEDRTLFVKAVIDLVRDYNLDGVDFDWEYPNGEGIGCNIVSIDDSANYLSFLRELHSKEPELYLSAAVAIHPFMDTNRTPMTDVSAFADVFNHIAIMAYDVWGSWSANETVGPNAPLYDSCAEPESQVGSAASAVKEWTEAGMPSDKIALGVAAYGRGFSVNNIEDFVSNGNHTEFPSDTTTPVGDRLDLPSTDVCGNTTWPSGVFNFWGLVEEGFLDVNGEANEGIQYFYDECSRTPFVYNESSTVMVSFDDARSLEEKGGFIAEMGLAGFTMWNLAGDYEDILVDAITRGMSS…
g8126	CE10(79-248)	N	N		MPSAIASIAPHEVHHGSLQTVFRGIDHPLSTAEAPIHQYRGIKYASVPARFRQSSLFTAFPKYTDATKYGPICPQFKTSKTFEEAMFGLEAADIPKQSLKQNEFDCLNMNITVPAGLTSHSRVPVMAWVHGGADRGSGSNWVYDGGALVRHGMLMGKPVIVVSFNFRLGLFGFAASIPLREDNRAAGEEGTGNYGLRDQRKALEWLHHFIGDFGGDPNNITLFGSATGAADVVSHLLSVSNELKPLFQRAIIQSAVFEPNFPDVAAAGCHLSRVMSALGVSTVEQLRSLDAERLTAYGQALRAVDDGIFFRHDWRTYFHHEDAHHHHHSALLSLSKSPKNPLRSTGMVLPARMQPLIIGDCGEDSLLWSLHASMWTSPAVVRRLKAVCQSMTKGMGVLK…
g8128	GH18(49-169)	N	N	CS pos: 16-17. ALA-SP. Pr: 0.5158	MHLFSPIALFLASALASPLSYPIPKPNTGGSGHLKVVAFPYWINDGSIPNNASFEKYTAVSYAFGLTNPNVSIVELPLAAILSVGGWHGSMYFSSAVATAENRTAFVNTITNLAQDYDLDGIDFVWNPNNQGIGNLFSPNDTANFLLFLQELRKEAGEDLYLTATTQTTPLISKLTSV
g8163	AA5_1(73-285)	N	N		TTGVSAMQLAVVSETTAVIFDKVNSFCASGSFLGNGTFVSIGGNPVVPPAGLDGLQALRLFTPCSDKTIQRHADGTRIPSQFLVDTLNGNHYPIIVYLRDGTIFVAANTEAMIFDWKTNTETRLPGIPNGVRITSPFSAGATLLPLTPENDYTPEVMICGGSTMSDTVRPDTLSSQTPASAQCSRIVLTAEGIAAGWKTESMPEARVMGELSLLPDGRVFIINGAQTGVAGYGNVGDRIGKSNTDNPVFTAVVYDPAAPAGSRFSREGIPASTIPRLYHSTSTLTEH
g8220	CE12(25-256)	CE12	N	CS pos: 22-23. VYA-AP. Pr: 0.7812	MRTFSLGFLGALVASIDALVYAAPTVYLAGDSTMAATGANDGSTAGWGAYIPNYLTLTVVNRAIGGRSARSFTREGRFTSIANEVKSGDYVVIEFGHNDGGSLTPTDNGRTDCGVGAAGYDTTCTTVYKCVFIFLTSMDCTHVLFRSGVTETVLTYQKYLANAAKTYIAKGANVIISSATPNNPWEGGSFSYSPNRFVGYAQDAASASGATFVDHGLYTASLYNRQGAAVVDAYYPNDHTHTSPEGASTVARAFALALEPTNSTLKNYLK
g8303	AA3_2(71-670)	AA8	N		MPYQDGHLNTIGVNLVFVALIVVPLRSQENSPESDTGTFAPLKFIYQAHDLDVAIKLFLSSLAKHTMPSQDTFDYLILGSGSAGSVIATRLAEDPNVSVCILEAGEDLTTQPNFLIPGLGAAILSGPSEADWNIHTVPQDHAKNRSIWMPRQVPSFLLNARPIIVFVRGKTVGGSGTINLAVLGKGHAEEYDSWESMGATGWNWQSLAPYFKKIETFTIGEEDSVEQGMKFDPAIHGSSGPIQRTLPKWKSNVTKPIGDALESVGVKRNPYAYDGDTLGFYPMQLSVHPEHVVRSSSANSYLAPNKEKENLTLLCGAHVTRVLFDRDEAEELVATGVEYSKDGVRKTIKATKEVIISCGAYKTPQLLELSGIGDKNILEAFGVPVLLDLPGVGNNLQDH…
g8355	GH3(38-251)	GH3	GH3		MPTDRSFLTADIPSLVKKLRNEEKIALLGAPNWWNTNAIERLNIPSIRMSDGPNGVRGSSHFVATPAQCLPCATSLAATFDQDIVRKAGVFLGEEAKVKSSVILLAPTCNIQRSPLGGRGFESFSEDPHLSGMMSAAYVQGLQSEGVSASIKHFVGNDQEHERTAAESVMSERALREIYLYPFMLAQKLAKPWAFMTSYGRINGIHVSESSEIMQGILRKEWGFDGIIMSDWYGTYSVDAAINAGLDLEMPGPPRWRTSVLMNQVLTAQKLLPRVLDERVTNMLKFVQRQARRNPEVVYGDGIERSRDSPEARAFCRKLTADGIVVLKNRDGVLPLREGKVKTITIVGPNAKERVISGGGSAQLKATYVITPYDGIKEATPKGIEINYHVGCYAHKYLP…
g8396	GT2_Glycos_transf_2(65-242)	GT2	N		METPTLLLAGALITGGFATLYTLLVIWSPAPIVTRESEKKCRTHKSPVTPTLLSQLSDPSSVDLTVVIPAYNETERLPLMLSSAIDHLTSKKLHSFEILIVDDGSSDDTSDASLKLAGKYPDCDIKIVTLEKNLGKGGAVRHGMLYSSGERLLMVDADGASRFDDLELLWKAMDGIAPNNGAGVVVGSRAHLVKTEAVVKRSFIRNILMYGLHTILRIVGVGHIRDTQCGFKLFSRAAAQQIFPLQHLATWIFDVELLLLAKQLRIPVAEVPIDWHEVPGSKLNVVTASLQMLRDLLVVRANLLLGRWSVKLKSD
g8400	GH16(67-269)	N	N	CS pos: 15-16. GAA-LP. Pr: 0.6867	MMPLVLLALCSFGAALPVPRKEVDKCTPFKTNFKAGSVADQNATSPATAGAFFVATSPPGTFTTGTDGDSLVLRMQRPEGEVKRIPPAEGVSGPGTNDKLGLGATVNMTALLQYGAITFEVKAPKVAGLVTAVVLVGHDNGDEIDVEILGSDTKRFSTNMFSTPAGEEPIYGQFGDIKDLKTPTGDKDIGEFHKYTIDWSPQRIVWSVDGRKGEYIKRRLKKDSDDSKAKNGKSYYPTKPMRVQMGIWDASGNSGSAEWAGGLVDWSKVGNEELERDDSIQSEEATVCTMTDDDDSDESEWETVSYKAPSKRKRRRDSDDDSEYKEKPPSKKELQDKVKQNADELRILISQELEADMEQMKRDNATSKEQDRRTIQKWEKEAKATSATLDALRREHAKL…
g8415	AA9(5-227)	AA9	N	CS pos: 18-19. AHG-NV. Pr: 0.3731	MLALAAALFSGVGVSAHGNVDVLTIGGVTHSGWLINTDPYSNPIPERIMRKIPGNGPVEDVSSIDLQCNRGAEPAPLVAAAKAGDTIDFHWVDWPESHKGPVLTYLAKAPEGTDITTWVPGSDAVWFKIDEAGFADGKWGGTDVLFAQGNTWTSTLPSQLPSGQYLVRHELIALHSAGTAGGAQFYPSCTQIEVTGTATEGPDSSFLVSFPGAYSSSDPGITVNIYQDLSSFSYTIPGPAVWLGDGSAPAPPAITTSQAAPTIPSPSSTNVVAPVPSTSVAVEPPVSSSIPTSVAAPTAPATTVPSAPTTIASPPASTGTSDCNTCMNEYNRCIDNTQPTPDWTGCTALKDTCMDSCSYNRKRMHKKHVHGAHNHGGQY
g8498	GT4(503-676)	N	GT4		MSPSPQDYSFESKPSAAVRRRLSSIATGARRPHVAAAKFSSLTPMWVGIAGSTINDSTEFMVALSVHDGVYTTDYSAVTIPYVVGEIDTTSKDIEKLVLKTLREFSDEHLCKFLGAGVTLSLLRECPNLCTRLWLDLDIVPIVFNIKPYHSDSVTRPNIKHRISTTGSYLPSGADTPTAYVESAQHKSTASLLVPTPNNVAGRLPILRTLDEQADSAARKSILYFGPNNNPRLSIGPRNQVTVDAAGKIHLLDDLDEYKKTVSTGTWNAVVKLADELREKQIKIGFFSSTPQGGGVALMRHALIRFLSALDVDVAWYVPNPSPAVFRTTKNNHNILQGVASPDLRLSKEAKDAFDAWILKNGLRWTAEGGPLAPGGVDVAFIDDPQMPGLIPLIKKLRP…
g8520	GT28(8-128)	N	N		MLAFVTVGSTRFDALVKAALSEQVLSALKQKGYTDLVLQCGDSDFDLGQALSREQTRRIAIHGLEVEIWRFQPSLQETFERSDLVISHAGSGTILDVLRLGKALIVVPNPTLLDNHQEELAFALSDLGHLQSSSAGGLAQAIVDFDSNNVVPFPSFDGARFRNIIDEEMGFED
g8532	CE10(19-175)	N	N		MDNLEIFPNVPYTNHSPNNPLLQFDLYVPRAPSVALKPLICFIHGGAWRSEDKSDHTVLARKLATATGFSVIVANYRLTPQSPSPETQFQHPNHAKDVVEFLNFVIAWSGPPSQPRPFDVGRIYLMGHSCGAHMLGSIFLDSSKVTPSLTPSARVQLAVRGLILSEGIYDIDALLDRFPSYRLWFIEHAFGDKESYGHVNVSALPARSTSMQWLIIHSSDDELIDVTQSETMFRHLRQLYEAVPRADELVYKVVGSYGQHNATLESDDFIEEVAAFIRDGIRSVTM
g8552	GH105(128-350)	GH0	N	CS pos: 16-17. ILA-AS. Pr: 0.3302	MLLAAIASITIPGILAASLSDSQLTSVKDKLAESAQRSWELGTRAQALLEYGAQTYSVFSDTPLPPPSSVTDQSADLSSVFDIARDIVSARQDGDGPQPLMEDGSAADPASNGVAVLLANWTGQGGSGGPDYAKAATEQLQFLLENVPRSNDGAISHRTSQAQLWSDFIYMVPPFFAYYGVLTSNETLVSEAYNQIRLYRDHLRDAGANNLWKHIVLGSGTDEGHWSTGNGWAAAGMLRVLATIQNSQYSDSFSSQKEDLANWTLEIQAAMYNVIDGSNIFRNYPDDDKSFYDAAGTALMASTVYRLSQIWDDQSYIPHAERSRNALYDGSHITSDGWLTPVVNPHSFGSEGSNSAEGQAFVLMMDAAHKGWVDAGSPGNGALQMSISHFSWSLVVALF…
g8563	GH76(400-750)	N	N		MFLQRLTSLLGASQAALELKWMKQFAAKSKIPLADMVARRMKDEPLQYILGTQPFGSLEIRTRAPTLIPRPETEDWTFKLSKIVRPTLTHPISLLDIGTGTGCIPLLLCSLWPQGSVSACGVDISDAALSLARENAALHDIPSDSPSVEKNTFQARRANILHPDFATHVSPPYDVVTSNPPYITFAEFLALPKSISQYEDPKALFGGATEGLDFYYAISRVLATDGFLRDNAVVALEVGEQQGEEVTEMLDLSGQSSDGRDRMLRTRTEIVFLSLLCLTERPPFSLLRTCRQIALSNPLDSRYIHHCIRLQLQLQFLVFDQPPSARFQTILLRLPGSCFILLKDFVCSINHRTRTALDLCVIAYSFSSFGIAVAIAALVVQAQDLGVPESWKNKDNHHS…
g8603	GH79(309-788)	N	N		SSTKTLFSPDTPIGSSWKSQLSHSSEKADIPSLTEKLKPLVSKGKLVLVDNTSSDDIAAFYPIWLKAGINVITPNKKAFSGPFSLYEDILASSKASGARFLNESTVGAGLPIISTLKDLVMTGDKVIKVEGVFSGTMSYIFNQYSTGLPDGPAFSSVEPHPADDLNGFDVARKLTILSRTIAPSSTIESFASVQTASLVPPALEGIPTGDEFIARLPEFDAEFDKMRKEAAKNKQVLRFVGVVDPVNGQVKAGMERYPIDHPFATSLGGSDNIVMFHTERYGARPLIVQGAGAGAAVTAMGVLGDLFNFSIENAFWTAFTGNVTHPSELTRNLFANLRDRTGIPVEVRIGGITADSTFWNETLDTPLSNYITDDGDLINTTIGPQFWDTFDVLPRDTKI…
g8623	CE4(39-160)	CE4	CE4	CS pos: 19-20. VNA-AP. Pr: 0.9422	MFASALLTFCLAALATVNAAPQPVSPAKRQSPSLIYSCTQPNTAAISFDDGPYDYIYDIVNTLNSKGAKGTFFMNGNNWRCMYDQDSQDRIKYAYNNGHQIASHTWSHSNMVDLSWDQLHNEMWRVEQALQRIIGVTPAFIRPPYGNFNDQVLQAAYSRGQNVVIWDFDSGDTVGADAQESKNRYDQVANQRPNTIMALNHEVVASTAYDVLPYAIDRLQSAGYQLVTVAECLGMQPYQNVGQAQTTDVRLHLCSNIAFLTPTTGFLELLDAWLRNEQSSYPDYIYLRITHNNLCPSTLISTVIQRCNGDSQVY
g8668	GH18(79-416)	GH18	GH18		MAPSYERLATDDSGTDPPPSPPKRNLKKTAAFIAAFLTVALVSFELGILYSNSSSNNVEKQPESPPVSGNNSESDMTGKYSVGYFVNWGIYGRKYPPSNIPVKDLTHILYAFANLSPSTGTVALSDPWADQDIHYPGDSWNDSGENLYGNFKAIYKLKQANRHLKLLLSIGGWTYSPSFHPIVVNPALRAEFVRSSVRLLEDYGLDGLDIDYEYPQNDAQALGYVDLLRELRHALDVHSPQHHFLLTIAAPCGVDNYSKLRIAEMDPLLDFWNLMAYDFSGSWDAIANHQANLFGPPVSASGAVSYYVKAGVAPRKLILGIPLYGRSFANTKGPGSAFSGVGAGSWEAGVYDYRALPLPGSHVLRDVNAGASWTYDYGKKEMVSFDSEEVGKWKGEWIR…
g8721	GH29(415-666)	N	GH29	CS pos: 15-16. ANA-LQ. Pr: 0.7969	MLFLSLLVHTLAANALQTTVDFSLFVNNKAAAVEGSLANYDGHNGSYPAEYLPTGTLVDAAINYTLPNFTDMSVNDNINCSGQTVALPQGKYLSFNFLGATDGIAYVNGEFQAIYDDGTIEPLGFVVAPWWLKNPSDGYALSATLVRLLIPDQPNNRSISKHGSLQWYHVQKFQTAGSQLTGVVSIHVFSITLVSTDEVSHPVQPLLNIQNVRSTTKFRVVEDIAVQLYEITLNNFAPTTAGPEAWITRNTSISLHSSSLATVIPGRVQRLRGGDQVRIVVGVVNVDGVEPGTPISDVEVLIDGKKVGKCWDTIAGIPDYYIGDDSLKTHESAEWFDKAKFGLFVHWGIYSVPAWTVSGTQYSEWYWYWQHNPADESSAVWKHHKEVYGEDFLYDDFFP…
[truncated: 136 more rows]

## Sheet: Table S3
Table S3. Distribution of CAZymes in the Flammulina rossica genome and in other fungal genomes.
CAZyme	Family		Basidiomycota																Ascomycota
			F. rosica				F. ononidis	F. fennae	F. elastica	F. velutipes	A. bisporus	C. cinerea	L. bicolor	L. edodes	P. chrysosporium	S. commune	C. neoformans		C. militaris	T. reesei	S. cerevisiae	A. nudulans	N. crassa	B. cinerea
[truncated: 208 more rows]

## Sheet: Table S4
Table S4. Conserved motifs of predicted CAZymes.
[truncated: 78 more rows]
